# Supplementary material for: Impact of c-di-GMP on the Extracellular Proteome of Rhizobium etli
Source: MDPI journal article supplement (doi:10.3390/biology12010044), 2022-12-26
Supplement: s1 [file s1]

Supplementary Materials

# Impact of c-di-GMP on the Extracellular Proteome of *Rhizobium etli*

María J. Lorite <sup>1</sup>, Ariana Casas-Román <sup>1</sup>, Lourdes Girard <sup>2</sup>, Sergio Encarnación <sup>2</sup>, Natalia Díaz-Garrido <sup>3,†</sup>, Josefa Badía <sup>3,4</sup>, Laura Baldomá <sup>3</sup>, Daniel Pérez-Mendoza <sup>1</sup> and Juan Sanjuán <sup>1,\*</sup>

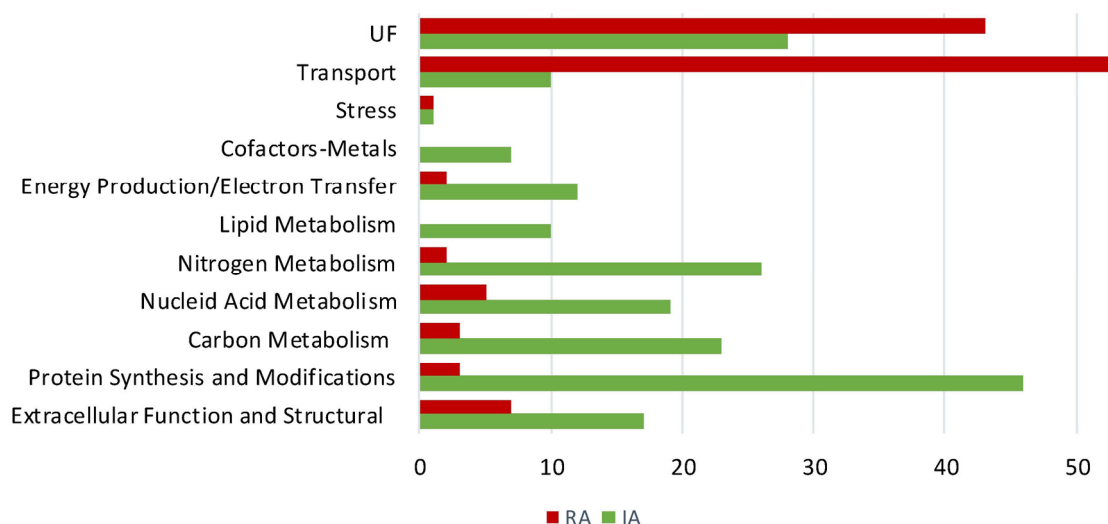

**Figure S1.** Gene Ontology (GO) classification of proteins displaying differential abundance in the supernatants of the high cdG strain LR101. IA increased abundance, RA reduced abundance.

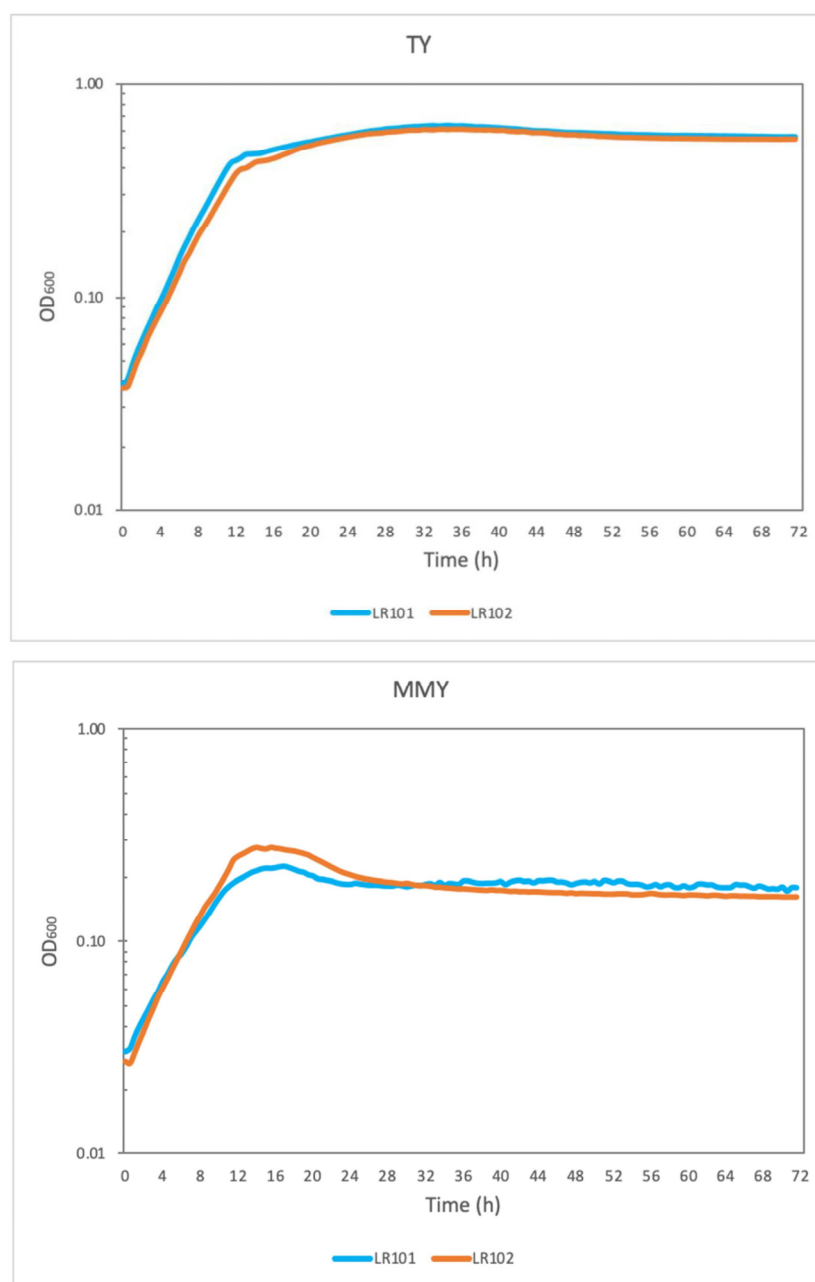

**Figure S2.** Growth curves of the *R. etli* strains LR101 and LR102. Rich medium TY or MMY medium with succinate as the carbon source were used. The cultures were incubated for 72h with continuous shaking at 28 °C, and OD600 was measured every 30 minutes in a Bioscreen C.
