# Supplementary material for: Impact of c-di-GMP on the Extracellular Proteome of Rhizobium etli
Source: Biology (Basel). 2022 Dec 26;12(1):44. doi: 10.3390/biology12010044 (PMC9855851; doi:10.3390/biology12010044)
Supplement: Supplementary file 1 [file biology-12-00044-s001.zip › TableS1-ExtracellularSpots-2D-GE.xlsx]

## Sheet: Hoja1
extra D solo identificadas	3126	eD1
extra D solo identificadas	3208	eD10
extra D solo identificadas	8409	eD100
extra D solo identificadas	7415	eD101
extra D solo identificadas	8501	eD102
extra D solo identificadas	8513	eD103
extra D solo identificadas	8606	eD104
extra D solo identificadas	8609	eD105
extra D solo identificadas	8610	eD106
extra D solo identificadas	7626	eD107
extra D solo identificadas	7627	eD108
extra D solo identificadas	7625	eD109
extra D solo identificadas	6109	eD11
extra D solo identificadas	6611	eD110
extra D solo identificadas	6615	eD111
extra D solo identificadas	6625	eD112
extra D solo identificadas	6528	eD113
extra D solo identificadas	6529	eD114
extra D solo identificadas	6530	eD115
extra D solo identificadas	5613	eD116
extra D solo identificadas	6628	eD117
extra D solo identificadas	5614	eD118
extra D solo identificadas	5627	eD119
extra D solo identificadas	4208	eD12
extra D solo identificadas	5601	eD120
extra D solo identificadas	6708	eD121
extra D solo identificadas	5711	eD122
extra D solo identificadas	6729	eD123
extra D solo identificadas	6731	eD124
extra D solo identificadas	5715	eD125
extra D solo identificadas	5724	eD126
extra D solo identificadas	5725	eD127
extra D solo identificadas	6742	eD128
extra D solo identificadas	6743	eD129
extra D solo identificadas	2203	eD13
extra D solo identificadas	6803	eD130
extra D solo identificadas	4715	eD131
extra D solo identificadas	5718	eD132
extra D solo identificadas	5717	eD133
extra D solo identificadas	4719	eD134
extra D solo identificadas	3642	eD135
extra D solo identificadas	3643	eD136
extra D solo identificadas	3644	eD137
extra D solo identificadas	3601	eD138
extra D solo identificadas	2704	eD139
extra D solo identificadas	4125	eD14
extra D solo identificadas	3703	eD140
extra D solo identificadas	3706	eD141
extra D solo identificadas	3904	eD142
extra D solo identificadas	3830	eD143
extra D solo identificadas	3829	eD144
extra D solo identificadas	4830	eD145
extra D solo identificadas	6828	eD146
extra D solo identificadas	6825	eD147
extra D solo identificadas	6826	eD148
extra D solo identificadas	5802	eD149
extra D solo identificadas	4120	eD15
extra D solo identificadas	4813	eD150
extra D solo identificadas	4812	eD151
extra D solo identificadas	4816	eD152
extra D solo identificadas	6806	eD153
extra D solo identificadas	2804	eD154
extra D solo identificadas	3801	eD155
extra D solo identificadas	7730	eD156
extra D solo identificadas	7721	eD157
extra D solo identificadas	7705	eD158
extra D solo identificadas	4727	eD159
extra D solo identificadas	4121	eD16
extra D solo identificadas	4703	eD160
extra D solo identificadas	4716	eD161
extra D solo identificadas	4621	eD162
extra D solo identificadas	4613	eD163
extra D solo identificadas	4622	eD164
extra D solo identificadas	4623	eD165
extra D solo identificadas	3702	eD166
extra D solo identificadas	3641	eD167
extra D solo identificadas	2806	eD168
extra D solo identificadas	3816	eD169
extra D solo identificadas	6216	eD17
extra D solo identificadas	3819	eD170
extra D solo identificadas	3802	eD171
extra D solo identificadas	4815	eD172
extra D solo identificadas	5805	eD173
extra D solo identificadas	6704	eD174
extra D solo identificadas	6707	eD175
extra D solo identificadas	6711	eD176
extra D solo identificadas	7729	eD177
extra D solo identificadas	8717	eD178
extra D solo identificadas	1502	eD179
extra D solo identificadas	3814	eD179
extra D solo identificadas	6317	eD18
extra D solo identificadas	1501	eD180
extra D solo identificadas	1627	eD181
extra D solo identificadas	3311	eD19
extra D solo identificadas	1213	eD2
extra D solo identificadas	2305	eD20
extra D solo identificadas	2219	eD21
extra D solo identificadas	6209	eD22
extra D solo identificadas	2310	eD23
extra D solo identificadas	2308	eD24
extra D solo identificadas	3334	eD25
extra D solo identificadas	4205	eD251
extra D solo identificadas	5202	eD252
extra D solo identificadas	8202	eD253
extra D solo identificadas	8204	eD254
extra D solo identificadas	8302	eD255
extra D solo identificadas	6315	eD256
extra D solo identificadas	6301	eD257
extra D solo identificadas	6405	eD258
extra D solo identificadas	6413	eD259
extra D solo identificadas	5323	eD26
extra D solo identificadas	7508	eD266
extra D solo identificadas	7603	eD268
extra D solo identificadas	7602	eD269
extra D solo identificadas	5321	eD27
extra D solo identificadas	7703	eD271
extra D solo identificadas	3404	eD274
extra D solo identificadas	3503	eD275
extra D solo identificadas	3611	eD278
extra D solo identificadas	5320	eD28
extra D solo identificadas	2501	eD280
extra D solo identificadas	2609	eD281
extra D solo identificadas	1701	eD283
extra D solo identificadas	1702	eD284
extra D solo identificadas	5322	eD29
extra D solo identificadas	8202	eD3
extra D solo identificadas	2402	eD30
extra D solo identificadas	2406	eD31
extra D solo identificadas	2404	eD32
extra D solo identificadas	3504	eD33
extra D solo identificadas	2414	eD34
extra D solo identificadas	2503	eD35
extra D solo identificadas	2502	eD36
extra D solo identificadas	1513	eD37
extra D solo identificadas	1602	eD38
extra D solo identificadas	1603	eD39
extra D solo identificadas	6214	eD4
extra D solo identificadas	1538	eD40
extra D solo identificadas	1539	eD41
extra D solo identificadas	1518	eD42
extra D solo identificadas	505	eD43
extra D solo identificadas	1535	eD44
extra D solo identificadas	2602	eD45
extra D solo identificadas	1537	eD46
extra D solo identificadas	1610	eD47
extra D solo identificadas	1508	eD48
extra D solo identificadas	1515	eD49
extra D solo identificadas	6215	eD5
extra D solo identificadas	607	eD50
extra D solo identificadas	2606	eD51
extra D solo identificadas	2633	eD52
extra D solo identificadas	2702	eD53
extra D solo identificadas	1707	eD54
extra D solo identificadas	1705	eD55
extra D solo identificadas	2608	eD56
extra D solo identificadas	2521	eD57
extra D solo identificadas	2614	eD58
extra D solo identificadas	2611	eD59
extra D solo identificadas	2202	eD6
extra D solo identificadas	2612	eD60
extra D solo identificadas	2626	eD61
extra D solo identificadas	3523	eD62
extra D solo identificadas	3521	eD63
extra D solo identificadas	3414	eD64
extra D solo identificadas	3520	eD65
extra D solo identificadas	3522	eD66
extra D solo identificadas	3415	eD67
extra D solo identificadas	4519	eD68
extra D solo identificadas	4523	eD69
extra D solo identificadas	3206	eD7
extra D solo identificadas	3610	eD70
extra D solo identificadas	3615	eD71
extra D solo identificadas	4615	eD72
extra D solo identificadas	4605	eD73
extra D solo identificadas	4404	eD74
extra D solo identificadas	4421	eD75
extra D solo identificadas	4514	eD76
extra D solo identificadas	5416	eD77
extra D solo identificadas	4506	eD78
extra D solo identificadas	4508	eD79
extra D solo identificadas	3204	eD8
extra D solo identificadas	4607	eD80
extra D solo identificadas	4609	eD81
extra D solo identificadas	4516	eD82
extra D solo identificadas	5520	eD83
extra D solo identificadas	5418	eD84
extra D solo identificadas	6510	eD85
extra D solo identificadas	6513	eD86
extra D solo identificadas	7316	eD87
extra D solo identificadas	7317	eD88
extra D solo identificadas	7425	eD89
extra D solo identificadas	3202	eD9
extra D solo identificadas	7419	eD90
extra D solo identificadas	7420	eD91
extra D solo identificadas	7423	eD92
extra D solo identificadas	8421	eD93
extra D solo identificadas	7413	eD94
extra D solo identificadas	7417	eD95
extra D solo identificadas	8426	eD96
extra D solo identificadas	8314	eD97
extra D solo identificadas	8407	eD98
extra D solo identificadas	8424	eD99

## Sheet: Hoja2
Spot	Spot nva nomenclatura	Database	Fecha	Nombre de la proteina	gi	Score	Probabilidad	Mw	pI	Buscadas	Macheadas	%cov	URL	SSP	spot PDQ	14_8_celA	14_sn2_7celA	14_10_celA	Promedio LR102	14_9b_celApleD	14_11_celApleD	14_12_celApleD	Promedio LR101
e101	e101	Retli_jun13 (5963 sequences-1861603 residues)	10 Mar 2015 at 02:28:12 GMT	flagellin C protein [Rhizobium etli CFN 42]	gi|86356320	89	8.2e-06	31060	4.62	17	6	0.27	http://132.248.34.208/mascot/cgi/master_results.pl?file=../data/20150309/F034762.dat	8420	e101	8.4	15.5	6.1	10				0
e105	e105	Retli_jun13 (5963 sequences-1861603 residues)	9 Dec 2014 at 00:31:02 GMT	hypothetical protein RHE_CH02456 [Rhizobium etli CFN 42]	gi|86358068	67	0.0012	28048	5.64	12	7	0.26	http://132.248.34.208/mascot/cgi/master_results.pl?file=../data/20141208/F033112.dat	2305	e105	9.3	15.4	6.3	10.33	97.9	8.5		53.2
e106	e106	Retli_jun13 (5963 sequences-1861603 residues)	9 Dec 2014 at 00:45:50 GMT	hypothetical protein RHE_CH00301 [Rhizobium etli CFN 42]	gi|86355958	66	0.0016	39441	6.56	16	6	0.29	http://132.248.34.208/mascot/cgi/master_results.pl?file=../data/20141208/F033136.dat	4304	e106	3.4	1.4	2.4	2.4	0.1	0.1	0.1	0.1
e107	e107	Retli_jun13 (5963 sequences-1861603 residues)	9 Dec 2014 at 01:18:30 GMT	glyceraldehyde 3-phosphate dehydrogenase [Rhizobium etli CFN 42]	gi|86359087	57	0.012	36016	6.87	16	4	0.15	http://132.248.34.208/mascot/cgi/master_results.pl?file=../data/20141208/F033160.dat	4301	e107	6.2	2.4	7.4	5.33	0.4	0.3	0.6	0.43
e108	e108	Retli_jun13 (5963 sequences-1861603 residues)	10 Mar 2015 at 02:50:46 GMT	amino acid ABC transporter substrate-binding protein [Rhizobium etli CFN 42]	gi|86359585	126	1.5e-09	27631	5.56	45	12	0.5	http://132.248.34.208/mascot/cgi/master_results.pl?file=../data/20150309/F034769.dat	4204	e108	1404	1895.6	1457.2	1585.6	1175.6	872	1160.5	1069.37
e109	e109	Retli_jun13 (5963 sequences-1861603 residues)	10 Mar 2016 at 17:39:30 GMT	hydrolase [Rhizobium etli CFN 42]	gi|86358331	63	0.0029	25854	5.49	13	6	0.21	http://132.248.34.208/mascot/cgi/master_results.pl?file=../data/20160310/F042573.dat	4205	e109	20.2	11.2	20	17.13	0.4	3.2	0.4	1.33
e110	e110	Retli_jun13 (5963 sequences-1861603 residues)	10 Mar 2016 at 17:52:17 GMT	amino acid ABC transporter substrate-binding protein [Rhizobium etli CFN 42]	gi|86359585	94	2.4e-06	27631	5.56	17	7	0.36	http://132.248.34.208/mascot/cgi/master_results.pl?file=../data/20160310/F042582.dat	5202	e110	43.7	52	48.9	48.2	3.7	2.9	15.9	7.5
e111	e111	Retli_jun13 (5963 sequences-1861603 residues)	16 Apr 2015 at 20:28:48 GMT	amino acid ABC transporter substrate-binding protein [Rhizobium etli CFN 42]	gi|86358031	82	3.6e-05	27969	5.02	29	10	0.42	http://132.248.34.208/mascot/cgi/master_results.pl?file=../data/20150416/F034928.dat	7301	e111	1380.7	1736.7	1404.4	1507.27	833.9	819.7	894.4	849.33
e112	e112	Retli_jun13 (5963 sequences-1861603 residues)	16 Apr 2015 at 20:30:30 GMT	amino acid ABC transporter- substrate-binding protein [Rhizobium etli CFN 42]	gi|86359543	91	4.8e-06	28915	4.79	34	11	0.39	http://132.248.34.208/mascot/cgi/master_results.pl?file=../data/20150416/F034929.dat	8302	e112	407.4	388.4	482	425.93	81.9	77.2	234.7	131.27
e114	e114	Retli_jun13 (5963 sequences-1861603 residues)	16 Apr 2015 at 21:03:51 GMT	outer membrane lipoproteins carrier protein [Rhizobium etli CFN 42]	gi|86359551	63	0.0032	24065	7.93	21	5	0.18	http://132.248.34.208/mascot/cgi/master_results.pl?file=../data/20150416/F034943.dat	1208	e114	15.5	13.9	16.6	15.33	0.1	0.1	0.6	0.27
e115	e115	Retli_jun13 (5963 sequences-1861603 residues)	25 May 2016 at 21:03:59 GMT	outer membrane protein [Rhizobium etli CFN 42]	gi|86357119	100	6e-07	22322	4.55	23	7	0.36	http://132.248.34.208/mascot/cgi/master_results.pl?file=../data/20160525/F042916.dat	8202	e115	1118.3	4325.5	2238.8	2560.87	420.2	2.6	683.7	368.83
e116	e116	Retli_jun13 (5963 sequences-1861603 residues)	7 Mar 2015 at 01:48:27 GMT	peptidyl prolyl cis-trans isomerase A signal peptide protein [Rhizobium etli CFN 42]	gi|86357733	73	0.00033	20472	6.84	12	5	0.31	http://132.248.34.208/mascot/cgi/master_results.pl?file=../data/20150306/F034635.dat	1202	e116	317.9	300.2	342.4	320.17	78.3	95.2	151.3	108.27
e119	e119	Retli_jun13 (5963 sequences-1861603 residues)	23 Jun 2015 at 22:23:23 GMT	oligopeptide ABC transporter substrate-binding protein [Rhizobium etli CFN 42]	gi|86360005	99	7.3e-07	57942	5.84	31	10	0.29	http://132.248.34.208/mascot/cgi/master_results.pl?file=../data/20150623/F037292.dat	4704	e119	37.9	12.3	13.7	21.3	2.8	3.5	6.3	4.2
e120	e120	Retli_jun13 (5963 sequences-1861603 residues)	23 Jun 2015 at 22:40:38 GMT	metal-dependent hydrolase [Rhizobium etli CFN 42]	gi|86358226	74	0.00024	33073	5.61	12	6	0.31	http://132.248.34.208/mascot/cgi/master_results.pl?file=../data/20150623/F037300.dat	4705	e120	14	9.1	13.4	12.17	0.4	0.7	0.7	0.6
e124	e124	Retli_jun13 (5963 sequences-1861603 residues)	23 Jun 2015 at 23:28:34 GMT	ferrichrome ABC transporter substrate-binding protein [Rhizobium etli CFN 42]	gi|86358289	115	1.9e-08	35126	5.49	31	10	0.31	http://132.248.34.208/mascot/cgi/master_results.pl?file=../data/20150623/F037306.dat	4507	e124	94.5	10.2	73.5	59.4	0.2	0.2	3.4	1.27
e125	e125	Retli_jun13 (5963 sequences-1861603 residues)	24 Jun 2015 at 00:19:51 GMT	hypothetical protein RHE_CH03432 [Rhizobium etli CFN 42]	gi|86359024	85	1.8e-05	34112	6.13	27	9	0.41	http://132.248.34.208/mascot/cgi/master_results.pl?file=../data/20150623/F037328.dat	3308	e125	171	38	117	108.67	9.7	8.1	11.5	9.77
e126	e126	Retli_jun13 (5963 sequences-1861603 residues)	24 Jun 2015 at 00:25:59 GMT	sugar ABC transporter substrate-binding protein [Rhizobium etli CFN 42]	gi|86360563	81	4.7e-05	34553	6.02	20	8	0.35	http://132.248.34.208/mascot/cgi/master_results.pl?file=../data/20150623/F037332.dat	3309	e126	157.2	49.8	125.5	110.83	38.1	32.2	16.7	29
e127	e127	Retli_jun13 (5963 sequences-1861603 residues)	24 Jun 2015 at 01:24:37 GMT	hypothetical protein RHE_CH03508 [Rhizobium etli CFN 42]	gi|86359099	82	3.6e-05	34238	5.91	20	8	0.39	http://132.248.34.208/mascot/cgi/master_results.pl?file=../data/20150623/F037365.dat	4302	e127	378	235.7	266.7	293.47	69.2	71.6	140.7	93.83
e128	e128	Retli_jun13 (5963 sequences-1861603 residues)	24 Jun 2015 at 01:00:34 GMT	sugar ABC transporter- substrate-binding protein [Rhizobium etli CFN 42]	gi|86356148	73	0.00031	34234	6.64	28	7	0.19	http://132.248.34.208/mascot/cgi/master_results.pl?file=../data/20150623/F037350.dat	4303	e128	269.2	176.5	214.6	220.1	47.3	31.9	102.7	60.63
e129	e129	Retli_jun13 (5963 sequences-1861603 residues)	25 May 2016 at 21:26:50 GMT	outer membrane lipoprotein [Rhizobium etli CFN 42]	gi|86355846	83	3.2e-05	34914	5.56	36	14	0.4	http://132.248.34.208/mascot/cgi/master_results.pl?file=../data/20160525/F042930.dat	5304	e129	252.4	23.7	203.9	160	36.2	70.4	34.8	47.13
e130	e130	Retli_jun13 (5963 sequences-1861603 residues)	24 Jun 2015 at 01:03:54 GMT	general L-amino acid ABC transporter- substrate-binding protein [Rhizobium etli CFN 42]	gi|86357519	129	7.5e-10	37753	5.44	29	13	0.35	http://132.248.34.208/mascot/cgi/master_results.pl?file=../data/20150623/F037353.dat	6301	e130	137	44.3	305.3	162.2	30.2	16.9	23.2	23.43
e132	e132	Retli_jun13 (5963 sequences-1861603 residues)	15 Oct 2015 at 22:01:36 GMT	hypothetical protein RHE_CH00301 [Rhizobium etli CFN 42]	gi|86355958	61	0.0053	39455	6.56	27	5	0.23	http://132.248.34.208/mascot/cgi/master_results.pl?file=../data/20151015/F039826.dat	6307	e132	400.7	38.7	80	173.13	17.5	9.8	19.5	15.6
e139	e139	Retli_jun13 (5963 sequences-1861603 residues)	24 May 2016 at 23:48:26 GMT	hydrolase [Rhizobium etli CFN 42]	gi|86358331	57	0.011	25854	5.49	23	6	0.22	http://132.248.34.208/mascot/cgi/master_results.pl?file=../data/20160524/F042795.dat	4201	e139	226.6	70.4	122.9	139.97	15.3	29.2	32.3	25.6
e140	e140	Retli_jun13 (5963 sequences-1861603 residues)	5 Mar 2015 at 01:41:27 GMT	amino acid ABC transporter substrate-binding protein [Rhizobium etli CFN 42]	gi|86357103	71	0.00051	28838	5.83	23	6	0.27	http://132.248.34.208/mascot/cgi/master_results.pl?file=../data/20150304/F034232.dat	2301	e140	9.7	8.2	11.4	9.77	0.7	0.2	1.8	0.9
e144	e144	Retli_jun13 (5963 sequences-1861603 residues)	5 Mar 2015 at 02:13:49 GMT	phosphate ABC transporter- substrate-binding protein [Rhizobium etli CFN 42]	gi|86356163	61	0.0053	36299	5.12	31	6	0.22	http://132.248.34.208/mascot/cgi/master_results.pl?file=../data/20150304/F034252.dat	6505	e144	68.3	34.4	106.4	69.7			0	0
e146	e146	Retli_jun13 (5963 sequences-1861603 residues)	7 Mar 2015 at 01:55:34 GMT	xylose ABC transporter- substrate-binding protein [Rhizobium etli CFN 42]	gi|86358766	65	0.0018	37677	4.77	18	6	0.22	http://132.248.34.208/mascot/cgi/master_results.pl?file=../data/20150306/F034644.dat	7423	e146	3925.4	6363.7	3098.7	4462.6	10272.1	7612.6	11874.8	9919.83
e147	e147	Retli_jun13 (5963 sequences-1861603 residues)	10 Mar 2015 at 01:11:29 GMT	flagellin C protein [Rhizobium etli CFN 42]	gi|86356320	72	0.00035	31060	4.62	17	7	0.23	http://132.248.34.208/mascot/cgi/master_results.pl?file=../data/20150309/F034740.dat	7415	e147	9.1	87.5		48.3	32.8	17.4	51.8	34
e148	e148	Retli_jun13 (5963 sequences-1861603 residues)	7 Mar 2015 at 02:09:58 GMT	flagellin C protein [Rhizobium etli CFN 42]	gi|86356320	73	0.0003	31060	4.62	20	6	0.33	http://132.248.34.208/mascot/cgi/master_results.pl?file=../data/20150306/F034653.dat	7413	e148	2693.6	4048.5	1322.7	2688.27	3819.9	5321.6	4830.4	4657.3
e149	e149	Retli_jun13 (5963 sequences-1861603 residues)	10 Mar 2015 at 00:18:01 GMT	flagellin C protein [Rhizobium etli CFN 42]	gi|86356321	74	0.00025	31081	4.5	20	8	0.36	http://132.248.34.208/mascot/cgi/master_results.pl?file=../data/20150309/F034696.dat	8426	e149	2128.9	3704.3	1807.6	2546.93	18431.9	13257.4	9667.2	13785.5
e150	e150	Retli_jun13 (5963 sequences-1861603 residues)	10 Mar 2015 at 00:40:13 GMT	flagellin C protein [Rhizobium etli CFN 42]	gi|86356321	66	0.0015	31081	4.5	34	10	0.36	http://132.248.34.208/mascot/cgi/master_results.pl?file=../data/20150309/F034715.dat	8407	e150	852.8	155.8	339.2	449.27	1329.6	105.8	2953.8	1463.07
e151	e151	Retli_jun13 (5963 sequences-1861603 residues)	16 Apr 2015 at 21:36:27 GMT	flagellin C protein [Rhizobium etli CFN 42]	gi|86356322	102	3.8e-07	31535	4.45	31	10	0.37	http://132.248.34.208/mascot/cgi/master_results.pl?file=../data/20150416/F034975.dat	8424	e151	164.2	991.8	104.7	420.23	2279.8	2346.9	2000.7	2209.13
e152	e152	Retli_jun13 (5963 sequences-1861603 residues)	7 Mar 2015 at 02:21:12 GMT	multidrug efflux transporter [Rhizobium etli CFN 42]	gi|86359278	72	0.00034	40214	5.19	19	12	0.24	http://132.248.34.208/mascot/cgi/master_results.pl?file=../data/20150306/F034670.dat	8306	e152	3195.2	6408.9	2959.8	4187.97	10228.2	8344		9286.1
e153	e153	Retli_jun13 (5963 sequences-1861603 residues)	10 Mar 2015 at 01:54:04 GMT	thymidine phosphorylase [Rhizobium etli CFN 42]	gi|86355853	55	0.019	45413	5.42	26	6	0.22	http://132.248.34.208/mascot/cgi/master_results.pl?file=../data/20150309/F034755.dat	8304	e153	38.9	849.2	549.5	479.2	30.3	0.3	33.8	21.47
E19	e19	R_etli_291212 (5963 sequences-1861603 residues)	22 Aug 2014 at 23:54:00 GMT	malate dehydrogenase [Rhizobium etli CFN 42]	gi|86359472	96	1.6e-06	33920	5.53	28	9	0.35	http://132.248.34.208/mascot/cgi/master_results.pl?file=../data/20140822/F029186.dat	3504	e19	6.3	3.3	7.9	5.83	17.5	179	409	201.83
e21	e21	Retli_jun13 (5963 sequences-1861603 residues)	25 Aug 2015 at 15:17:58 GMT	transcription elongation factor GreA [Rhizobium etli CFN 42]	gi|86358571	60	0.0061	17465	4.88	27	9	0.53	http://132.248.34.208/mascot/cgi/master_results.pl?file=../data/20150825/F039405.dat	5503	e21	12.8	7	33.6	17.8				0
e249	e249	Retli_jun13 (5963 sequences-1861603 residues)	25 Feb 2016 at 18:59:15 GMT	peptide ABC transporter- substrate-binding protein [Rhizobium etli CFN 42]	gi|86357718	105	1.9e-07	67427	5.7	24	10	0.19	http://132.248.34.208/mascot/cgi/master_results.pl?file=../data/20160225/F042320.dat	3705	e249	39.1	15.6	4.9	19.87	7.6	7.9	14.4	9.97
E25	e25	R_etli_291212 (5963 sequences-1861603 residues)	22 Aug 2014 at 23:09:34 GMT	F0F1 ATP synthase subunit beta [Rhizobium etli CFN 42]	gi|86359451	76	0.00016	50506	4.87	13	7	0.19	http://132.248.34.208/mascot/cgi/master_results.pl?file=../data/20140822/F029165.dat	7517	e25	7.3	5.2		6.25				0
e250	e250	Retli_jun13 (5963 sequences-1861603 residues)	25 Feb 2016 at 18:53:59 GMT	phosphoenolpyruvate carboxykinase [Rhizobium etli CFN 42]	gi|86355705	92	3.9e-06	57925	5.65	20	14	0.22	http://132.248.34.208/mascot/cgi/master_results.pl?file=../data/20160225/F042317.dat	3703	e250	10.1	27.4	7.8	15.1	159.1	178.2	560.1	299.13
e251	e251	Retli_jun13 (5963 sequences-1861603 residues)	25 Feb 2016 at 19:21:52 GMT	dipeptide ABC transporter- substrate-binding protein [Rhizobium etli CFN 42]	gi|86357679	80	6.7e-05	58272	6	27	8	0.14	http://132.248.34.208/mascot/cgi/master_results.pl?file=../data/20160225/F042326.dat	3702	e251	12.5	8.8	9.3	10.2	2.2	2.4	3.6	2.73
e252	e252	Retli_jun13 (5963 sequences-1861603 residues)	25 Feb 2016 at 19:24:24 GMT	phosphoenolpyruvate carboxykinase [Rhizobium etli CFN 42]	gi|86355705	110	6e-08	57925	5.65	19	9	0.23	http://132.248.34.208/mascot/cgi/master_results.pl?file=../data/20160225/F042328.dat	2704	e252	8.9	19.4	5.6	11.3	807.2	794.9	353.2	651.77
e253	e253	Retli_jun13 (5963 sequences-1861603 residues)	25 Feb 2016 at 19:32:19 GMT	peptidoglycan binding protein (involved in cell wall degradation) [Rhizobium etli CFN 42]	gi|86357145	135	1.9e-10	47577	6.56	34	15	0.41	http://132.248.34.208/mascot/cgi/master_results.pl?file=../data/20160225/F042332.dat	3603	e253	71.3	42.2	115.3	76.27	2.2	3.4	34.4	13.33
e254	e254	Retli_jun13 (5963 sequences-1861603 residues)	25 Feb 2016 at 19:37:43 GMT	sugar ABC transporter substrate-binding protein [Rhizobium etli CFN 42]	gi|86360829	78	0.0001	47310	6.08	27	7	0.27	http://132.248.34.208/mascot/cgi/master_results.pl?file=../data/20160225/F042336.dat	3606	e254	93.2	26	76.4	65.2	17.8	24.6	38.4	26.93
E26	e26	R_etli_291212 (5963 sequences-1861603 residues)	22 Aug 2014 at 20:58:25 GMT	acyl-CoA transferases/L-carnitine dehydratase [Rhizobium etli CFN 42]	gi|86358480	57	0.012	39787	4.85	19	7	0.18	http://132.248.34.208/mascot/cgi/master_results.pl?file=../data/20140822/F029072.dat	6509	e26	143.5	4.2	227.6	125.1				0
E27	e27	R_etli_291212 (5963 sequences-1861603 residues)	22 Aug 2014 at 20:32:42 GMT	zinc uptake ABC transporter- substrate-binding protein [Rhizobium etli CFN 42]	gi|86358318	64	0.0022	37715	5.08	25	14	0.25	http://132.248.34.208/mascot/cgi/master_results.pl?file=../data/20140822/F029055.dat	6508	e27	46	40	127	71				0
e28	e28	Retli_jun13 (5963 sequences-1861603 residues)	4 Dec 2014 at 01:19:42 GMT	GTP-binding elongation factor protein (tyrosin phosphorylated protein) [Rhizobium etli CFN 42]	gi|86359496	55	0.018	66711	5.35	26	12	0.16	http://132.248.34.208/mascot/cgi/master_results.pl?file=../data/20141203/F032833.dat	5413	e28	1.1	1.7	3.6	2.13				0
e29	e29	Retli_jun13 (5963 sequences-1861603 residues)	4 Dec 2014 at 01:43:45 GMT	glucose-6-phosphate 1-dehydrogenase [Rhizobium etli CFN 42]	gi|86356355	104	2.4e-07	55381	6.13	33	12	0.29	http://132.248.34.208/mascot/cgi/master_results.pl?file=../data/20141203/F032852.dat	5406	e29	7	1.1	6	4.7				0
e37	e37	Retli_jun13 (5963 sequences-1861603 residues)	29 Jan 2016 at 23:38:22 GMT	esterase/lipase/thioesterase family protein [Rhizobium etli CFN 42]	gi|86357344	65	0.0018	37640	6.46	19	5	0.16	http://132.248.34.208/mascot/cgi/master_results.pl?file=../data/20160129/F041762.dat	4306	e37	9.1	5.7	8.9	7.9		0.7	0.7	0.7
E40 mix1	e40	R_etli_291212 (5963 sequences-1861603 residues)	22 Aug 2014 at 22:12:06 GMT	general L-amino acid ABC transporter, substrate-binding protein [Rhizobium etli CFN 42]	gi|86357519	116	1.5e-08	37753	5.44	33	6	0.2	http://132.248.34.208/mascot/cgi/master_results.pl?file=../data/20140822/F029124.dat	6309	e40	279.6	274	679.6	411.07				0
E40 mix2	e40	R_etli_291212 (5963 sequences-1861603 residues)	22 Aug 2014 at 22:12:06 GMT	zinc ABC transporter substrate-binding protein [Rhizobium etli CFN 42]	gi|86356617	116	1.5e-08	31808	5.09	33	5	0.21	http://132.248.34.208/mascot/cgi/master_results.pl?file=../data/20140822/F029124.dat	6309	e40	279.6	274	679.6	411.07				0
e41	e41	Retli_jun13 (5963 sequences-1861603 residues)	7 Mar 2016 at 22:35:21 GMT	general L-amino acid ABC transporter- substrate-binding protein [Rhizobium etli CFN 42]	gi|86357519	94	2.2e-06	37697	5.44	11	6	0.2	http://132.248.34.208/mascot/cgi/master_results.pl?file=../data/20160307/F042420.dat	6302	e41	4.4	1.3	2	2.57				0
E42	e42	R_etli_291212 (5963 sequences-1861603 residues)	22 Aug 2014 at 18:31:57 GMT	aliphatic sulfonate ABC transporter substrate-binding protein [Rhizobium etli CFN 42]	gi|86360211	79	7.7e-05	34846	5.2	14	10	0.26	http://132.248.34.208/mascot/cgi/master_results.pl?file=../data/20140822/F029038.dat	6316	e42	2.4	2.3	2.1	2.27				0
E43	e43	R_etli_291212 (5963 sequences-1861603 residues)	26 Aug 2014 at 02:27:19 GMT	hemin transport system- hemin-binding protein [Rhizobium etli CFN 42]	gi|86358868	73	0.00034	32560	5.48	42	11	0.32	http://132.248.34.208/mascot/cgi/master_results.pl?file=../data/20140825/F029348.dat	6303	e43	53.3	42.8	34.6	43.57				0
e44	e44	Retli_jun13 (5963 sequences-1861603 residues)	4 Dec 2014 at 01:52:43 GMT	hypothetical protein RHE_CH00301 [Rhizobium etli CFN 42]	gi|86355958	63	0.0032	39441	6.56	29	7	0.36	http://132.248.34.208/mascot/cgi/master_results.pl?file=../data/20141203/F032863.dat	6306	e44	3.9	2.4	6.3	4.2	2.3			2.3
e45	e45	Retli_jun13 (5963 sequences-1861603 residues)	4 Dec 2014 at 01:58:46 GMT	proline/glycine betaine ABC transporter- substrate-binding protein [Rhizobium etli CFN 42]	gi|86358686	53	0.027	34097	4.92	24	7	0.38	http://132.248.34.208/mascot/cgi/master_results.pl?file=../data/20141203/F032869.dat	7314	e45	9.4	3.3	1.8	4.83	0.8	3.7	33	12.5
e46	e46	Retli_jun13 (5963 sequences-1861603 residues)	7 Mar 2016 at 22:48:32 GMT	outer membrane lipoprotein [Rhizobium etli CFN 42]	gi|86355846	71	0.00051	34914	5.56	10	8	0.23	http://132.248.34.208/mascot/cgi/master_results.pl?file=../data/20160307/F042434.dat	4310	e46	4.9	3.4	4.2	4.17			0.1	0.1
e48	e48	Retli_jun13 (5963 sequences-1861603 residues)	7 Mar 2016 at 23:15:17 GMT	hypothetical protein RHE_PD00077 [Rhizobium etli CFN 42]	gi|89255323	60	0.0058	16177	9.23	9	4	0.25	http://132.248.34.208/mascot/cgi/master_results.pl?file=../data/20160307/F042446.dat	4202	e48	53	58.3	283.2	131.5				0
E49	e49	R_etli_291212 (5963 sequences-1861603 residues)	22 Aug 2014 at 20:36:24 GMT	fructose-bisphosphate aldolase [Rhizobium etli CFN 42]	gi|86359091	76	0.00016	37106	5.86	20	8	0.22	http://132.248.34.208/mascot/cgi/master_results.pl?file=../data/20140822/F029057.dat	5211	e49	2.8	4.4	15.2	7.47				0
E5	e5	R_etli_291212 (5963 sequences-1861603 residues)	26 Aug 2014 at 02:21:52 GMT	dipeptide ABC transporter- substrate-binding protein [Rhizobium etli CFN 42]	gi|86359571	78	9e-05	60179	5.23	17	8	0.22	http://132.248.34.208/mascot/cgi/master_results.pl?file=../data/20140825/F029339.dat	6712	e5	10.1	16.9	11.5	12.83	0.6	0.1	2.7	1.13
E52	e52	R_etli_291212 (5963 sequences-1861603 residues)	26 Aug 2014 at 01:55:02 GMT	polysaccharidase [Rhizobium etli CFN 42]	gi|86358212	81	4.5e-05	51501	4.53	26	6	0.21	http://132.248.34.208/mascot/cgi/master_results.pl?file=../data/20140825/F029307.dat	8702	e52	3.9	64.8	21.8	30.17			5.6	5.6
E53	e53	R_etli_291212 (5963 sequences-1861603 residues)	22 Aug 2014 at 22:47:45 GMT	DNA-directed RNA polymerase subunit alpha [Rhizobium etli CFN 42]	gi|86357329	74	0.00025	37358	4.75	17	7	0.24	http://132.248.34.208/mascot/cgi/master_results.pl?file=../data/20140822/F029151.dat	8705	e53	19.1	30.8	5.2	18.37			3.7	3.7
E56	e56	R_etli_291212 (5963 sequences-1861603 residues)	22 Aug 2014 at 04:08:57 GMT	dipeptide ABC transporter- substrate-binding protein [Rhizobium etli CFN 42]	gi|86356385	73	0.00029	58708	5.12	31	9	0.13	http://132.248.34.208/mascot/cgi/master_results.pl?file=../data/20140821/F028986.dat	6707	e56	823.3	508.7	517.5	616.5	27.2		321.9	174.55
e57	e57	Retli_jun13 (5963 sequences-1861603 residues)	8 Dec 2014 at 19:11:13 GMT	dipeptide ABC transporter- substrate-binding protein [Rhizobium etli CFN 42]	gi|86356385	55	0.018	58652	5.12	35	18	0.3	http://132.248.34.208/mascot/cgi/master_results.pl?file=../data/20141208/F032921.dat	6715	e57	41.5	30	13.3	28.27			0.2	0.2
E58	e58	R_etli_291212 (5963 sequences-1861603 residues)	26 Aug 2014 at 02:45:48 GMT	dipeptide ABC transporter- substrate-binding protein [Rhizobium etli CFN 42]	gi|86356385	63	0.0031	58708	5.12	19	14	0.2	http://132.248.34.208/mascot/cgi/master_results.pl?file=../data/20140825/F029369.dat	6704	e58	1963.6	3106.3	1179.4	2083.1	1578.4	1934.6	1620.6	1711.2
E6	e6	SwissProt 2014_07 (546000 sequences-194259968 residues)	22 Aug 2014 at 02:09:39 GMT	Phosphoenolpyruvate carboxykinase [ATP] OS=Rhizobium etli (strain CFN 42 / ATCC 51251) GN=pckA PE=3 SV=1	gi|86356385	140	3.3e-09	58023	5.65	36	16	0.35	http://www.matrixscience.com/cgi/master_results.pl?file=../data/20140822/FTgASxESS.dat	3729	e6	0.5	3.1	3.1	2.23	29.3	16	29.6	24.97
E61	e61	R_etli_291212 (5963 sequences-1861603 residues)	22 Aug 2014 at 21:58:24 GMT	bifunctional 2'-3'-cyclic nucleotide 2'-phosphodiesterase/3'-nucleotidase periplasmic precursor protein [Rhizobium etli CFN 42]	gi|86357396	63	0.0029	71731	5.47	17	7	0.1	http://132.248.34.208/mascot/cgi/master_results.pl?file=../data/20140822/F029114.dat	4810	e61	85.2	39.3	16.7	47.07	10	30.5	14	18.17
E68	e68	R_etli_291212 (5963 sequences-1861603 residues)	22 Aug 2014 at 22:18:14 GMT	sugar ABC transporter substrate-binding protein [Rhizobium etli CFN 42]	gi|86360824	104	2.4e-07	47756	6.68	27	11	0.26	http://132.248.34.208/mascot/cgi/master_results.pl?file=../data/20140822/F029125.dat	2502	e68	37.4	30.1	21.4	29.63	7.9	7.5	9.2	8.2
E69	e69	R_etli_291212 (5963 sequences-1861603 residues)	22 Aug 2014 at 23:01:01 GMT	translocation protein TolB [Rhizobium etli CFN 42]	gi|86359053	135	1.9e-10	47875	6.79	35	17	0.43	http://132.248.34.208/mascot/cgi/master_results.pl?file=../data/20140822/F029164.dat	2609	e69	189.8	57.2	244.2	163.73	3.4	5.4	45.1	17.97
E71	e71	R_etli_291212 (5963 sequences-1861603 residues)	22 Aug 2014 at 21:02:25 GMT	chaperonin GroEL [Rhizobium etli CFN 42]	gi|86356474	86	1.6e-05	57682	5.03	27	10	0.2	http://132.248.34.208/mascot/cgi/master_results.pl?file=../data/20140822/F029077.dat	6744	e71	66.7			66.7				0
E72	e72	R_etli_291212 (5963 sequences-1861603 residues)	23 Aug 2014 at 00:00:40 GMT	chaperonin GroEL [Rhizobium etli CFN 42]	gi|86356474	64	0.0022	57682	5.03	22	9	0.2	http://132.248.34.208/mascot/cgi/master_results.pl?file=../data/20140822/F029193.dat	6738	e72	73.2	83	27.5	61.23				0
e74	e74	Retli_jun13 (5963 sequences-1861603 residues)	11 Mar 2016 at 01:57:17 GMT	sn-glycerol-3-phosphate ABC transporter substrate-binding protein [Rhizobium etli CFN 42]	gi|86360123	68	0.00099	48466	5.95	8	5	0.14	http://132.248.34.208/mascot/cgi/master_results.pl?file=../data/20160310/F042706.dat	2611	e74	150.1	46.5	89.7	95.43	36.9	17.5	24.4	26.27
e76	e76	Retli_jun13 (5963 sequences-1861603 residues)	7 Mar 2016 at 23:45:19 GMT	translocation protein TolB [Rhizobium etli CFN 42]	gi|86359053	70	0.00054	47861	6.79	16	7	0.2	http://132.248.34.208/mascot/cgi/master_results.pl?file=../data/20160307/F042461.dat	3604	e76	11.8	6.5	8.7	9	0.3	0.6		0.45
e77	e77	Retli_jun13 (5963 sequences-1861603 residues)	13 Oct 2015 at 20:19:18 GMT	branched-chain amino acid ABC transporter- substrate-binding protein [Rhizobium etli CFN 42]	gi|86359037	125	1.9e-09	41214	6.03	17	9	0.33	http://132.248.34.208/mascot/cgi/master_results.pl?file=../data/20151013/F039670.dat	3502	e77	22.3	23.1	19.1	21.5		2.3	2.7	2.5
E78	e78	R_etli_291212 (5963 sequences-1861603 residues)	22 Aug 2014 at 22:06:57 GMT	ABC transporter- substrate-binding protein [Rhizobium etli CFN 42]	gi|86357703	66	0.0015	38933	5.94	30	9	0.3	http://132.248.34.208/mascot/cgi/master_results.pl?file=../data/20140822/F029118.dat	3501	e78	1243.4	1531.5	1004.6	1259.83	2021.7	1725.5	1343.3	1696.83
e79	e79	Retli_jun13 (5963 sequences-1861603 residues)	8 Mar 2016 at 00:02:27 GMT	ABC transporter- substrate-binding protein [Rhizobium etli CFN 42]	gi|86357703	91	5e-06	38904	5.94	12	6	0.2	http://132.248.34.208/mascot/cgi/master_results.pl?file=../data/20160307/F042483.dat	3513	e79	12.4		14.8	13.6	2.2	1.7	4.5	2.8
E80	e80	R_etli_291212 (5963 sequences-1861603 residues)	22 Aug 2014 at 22:00:53 GMT	ABC transporter- substrate-binding protein [Rhizobium etli CFN 42]	gi|86357703	94	2.4e-06	38933	5.94	24	9	0.36	http://132.248.34.208/mascot/cgi/master_results.pl?file=../data/20140822/F029115.dat	3503	e80	140.1	22	29	63.7	14.6	14.3	10.9	13.27
e82	e82	Retli_jun13 (5963 sequences-1861603 residues)	14 Oct 2015 at 16:00:25 GMT	hypothetical protein RHE_CH00301 [Rhizobium etli CFN 42]	gi|86355958	71	0.00045	39455	6.56	37	6	0.3	http://132.248.34.208/mascot/cgi/master_results.pl?file=../data/20151014/F039696.dat	3506	e82	8.7	26	22.4	19.03	19	20.3	0.3	13.2
e83	e83	Retli_jun13 (5963 sequences-1861603 residues)	14 Oct 2015 at 16:53:37 GMT	sugar ABC transporter- substrate-binding protein [Rhizobium etli CFN 42]	gi|86357687	86	1.4e-05	45124	5.83	29	9	0.32	http://132.248.34.208/mascot/cgi/master_results.pl?file=../data/20151014/F039712.dat	4501	e83	12.6	10.3	13.5	12.13	3.6	3.2	4.5	3.77
e84	e84	Retli_jun13 (5963 sequences-1861603 residues)	14 Oct 2015 at 18:18:09 GMT	trehalosemaltose ABC transporter sugar-binding protein [Rhizobium etli CFN 42]	gi|86360941	55	0.018	45645	5.53	37	8	0.23	http://132.248.34.208/mascot/cgi/master_results.pl?file=../data/20151014/F039723.dat	4607	e84	46.8	44.5	30.9	40.73	5.7	6.5	20.8	11
e85	e85	Retli_jun13 (5963 sequences-1861603 residues)	14 Oct 2015 at 18:26:26 GMT	LysR family NOD transcriptional regulator protein [Rhizobium etli CFN 42]	gi|21493002	50	0.054	35898	6.02	21	5	0.26	http://132.248.34.208/mascot/cgi/master_results.pl?file=../data/20151014/F039732.dat	4416	e85	23.5	22.5	16.6	20.87	3.5	3.4	1.2	2.7
e87	e87	Retli_jun13 (5963 sequences-1861603 residues)	8 Dec 2014 at 19:19:55 GMT	amino acid ABC transporter- substrate-binding protein [Rhizobium etli CFN 42]	gi|86358919	60	0.0057	38935	4.96	17	6	0.21	http://132.248.34.208/mascot/cgi/master_results.pl?file=../data/20141208/F032932.dat	7606	e87	52.9	40.2	38.5	43.87			2.7	2.7
e88	e88	Retli_jun13 (5963 sequences-1861603 residues)	8 Dec 2014 at 19:30:45 GMT	hypothetical protein RHE_PF00432 [Rhizobium etli CFN 42]	gi|86361162	53	0.032	41455	4.53	26	6	0.22	http://132.248.34.208/mascot/cgi/master_results.pl?file=../data/20141208/F032947.dat	8501	e88	51	23.9	27.6	34.17	21.1	18.6		19.85
e90	e90	Retli_jun13 (5963 sequences-1861603 residues)	14 Oct 2015 at 18:52:50 GMT	tRNA delta(2)-isopentenylpyrophosphate transferase [Rhizobium etli CFN 42]	gi|86358397	58	0.011	32254	5.93	41	9	0.36	http://132.248.34.208/mascot/cgi/master_results.pl?file=../data/20151014/F039756.dat	4402	e90	5.9	15.5	14.3	11.9	3.2	2.7	3.2	3.03
e93	e93	Retli_jun13 (5963 sequences-1861603 residues)	8 Mar 2016 at 00:23:14 GMT	fructose ABC transporter- substrate-binding protein [Rhizobium etli CFN 42]	gi|86356121	65	0.0018	35410	5.22	9	4	0.15	http://132.248.34.208/mascot/cgi/master_results.pl?file=../data/20160307/F042509.dat	6403	e93	968	1059.1	1161	1062.7	827.8	971.8	889.8	896.47
E94	e94	R_etli_291212 (5963 sequences-1861603 residues)	22 Aug 2014 at 23:15:30 GMT	glycine betaine ABC transporter- substrate binding protein [Rhizobium etli CFN 42]	gi|86356141	61	0.0052	31852	5.16	10	4	0.16	http://132.248.34.208/mascot/cgi/master_results.pl?file=../data/20140822/F029169.dat	6405	e94	1030.9	915.9	624.3	857.03	423.4	609.8	767.7	600.3
e96	e96	Retli_jun13 (5963 sequences-1861603 residues)	14 Oct 2015 at 19:17:17 GMT	ABC transporter- substrate-binding protein [Rhizobium etli CFN 42]	gi|86359509	81	5.3e-05	32516	5.08	29	9	0.39	http://132.248.34.208/mascot/cgi/master_results.pl?file=../data/20151014/F039784.dat	7401	e96	837.1	1351	772.9	987	453.1	214.9	890.6	519.53
e97	e97	Retli_jun13 (5963 sequences-1861603 residues)	14 Oct 2015 at 19:48:41 GMT	spermidine/putrescine ABC transporter- substrate-binding protein [Rhizobium etli CFN 42]	gi|86356365	81	4.8e-05	40597	5	43	10	0.44	http://132.248.34.208/mascot/cgi/master_results.pl?file=../data/20151014/F039790.dat	6413	e97	607.3	241.1	380.2	409.53	18.9	61.5	97	59.13
e98	e98	Retli_jun13 (5963 sequences-1861603 residues)	14 Oct 2015 at 20:01:36 GMT	amino acid ABC transporter- substrate-binding protein [Rhizobium etli CFN 42]	gi|86358694	70	0.00064	37622	4.99	19	7	0.29	http://132.248.34.208/mascot/cgi/master_results.pl?file=../data/20151014/F039796.dat	7503	e98	801.8	905.6	785.9	831.1	388.8	498.8	646.9	511.5
e99	e99	Retli_jun13 (5963 sequences-1861603 residues)	8 Mar 2016 at 22:30:59 GMT	xylose ABC transporter- substrate-binding protein [Rhizobium etli CFN 42]	gi|86358773	58	0.009	36117	5.21	18	7	0.2	http://132.248.34.208/mascot/cgi/master_results.pl?file=../data/20160308/F042555.dat	6510	e99	765.3	848.3	874.6	829.4	323	452.9	507.2	427.7
eD10	eD10	Retli_jun13 (5963 sequences-1861603 residues)	25 Nov 2014 at 20:48:52 GMT	oligopeptide ABC transporter ATP-binding protein [Rhizobium etli CFN 42]	gi|86360961	62	0.0039	63034	8.83	23	6	0.22	http://132.248.34.208/mascot/cgi/master_results.pl?file=../data/20141125/F031682.dat	3208	eD10	0.4	0.4	0.5	0.43	3.7	1.8		2.75
eD100	eD100	Retli_jun13 (5963 sequences-1861603 residues)	4 Dec 2014 at 00:54:26 GMT	flagellin C protein [Rhizobium etli CFN 42]	gi|86356322	91	4.7e-06	31535	4.45	30	11	0.43	http://132.248.34.208/mascot/cgi/master_results.pl?file=../data/20141203/F032810.dat	8409	eD100	2.1	4.6	38.3	15	6.1	41	850.2	299.1
D103	eD103	Retli_jun13 (5963 sequences-1861603 residues)	5 Mar 2015 at 02:26:10 GMT	hypothetical protein RHE_CH00301 [Rhizobium etli CFN 42]	gi|86355958	57	0.012	39455	6.56	23	6	0.29	http://132.248.34.208/mascot/cgi/master_results.pl?file=../data/20150304/F034264.dat	8513	eD103				0	4.2	4.2		4.2
eD105b	eD105	Retli_jun13 (5963 sequences-1861603 residues)	9 Dec 2014 at 02:04:24 GMT	chaperonin GroEL [Rhizobium etli CFN 42]	gi|86356474	60	0.0057	57682	5.03	12	5	0.12	http://132.248.34.208/mascot/cgi/master_results.pl?file=../data/20141208/F033212.dat	8609	eD105				0	1.6	0.8		1.2
eD108b	eD108	Retli_jun13 (5963 sequences-1861603 residues)	9 Dec 2014 at 02:02:28 GMT	dipeptide ABC transporter- substrate-binding protein [Rhizobium etli CFN 42]	gi|86359571	73	0.00029	60165	5.23	18	6	0.16	http://132.248.34.208/mascot/cgi/master_results.pl?file=../data/20141208/F033210.dat	7627	eD108				0	12.5	7.2		9.85
D110	eD110	Retli_jun13 (5963 sequences-1861603 residues)	6 Mar 2015 at 23:34:56 GMT	amino acid ABC transporter substrate-binding protein [Rhizobium etli CFN 42]	gi|86359585	108	9.5e-08	27631	5.56	29	10	0.4	http://132.248.34.208/mascot/cgi/master_results.pl?file=../data/20150306/F034538.dat	6611	eD110			0.2	0.2	854	926.1	3	594.37
D111	eD111	Retli_jun13 (5963 sequences-1861603 residues)	5 Mar 2015 at 22:44:11 GMT	DNA polymerase III subunit beta [Rhizobium etli CFN 42]	gi|86355975	71	0.00053	40553	4.92	21	7	0.26	http://132.248.34.208/mascot/cgi/master_results.pl?file=../data/20150305/F034317.dat	6615	eD111	0.5	1.7	1.2	1.13	5.7	2.8		4.25
D114	eD114	Retli_jun13 (5963 sequences-1861603 residues)	11 Mar 2016 at 02:02:04 GMT	sn-glycerol-3-phosphate ABC transporter substrate-binding protein [Rhizobium etli CFN 42]	gi|86360123	70	0.00057	48466	5.95	13	6	0.17	http://132.248.34.208/mascot/cgi/master_results.pl?file=../data/20160310/F042709.dat	6529	eD114				0	1063.5	1093.3		1078.4
D120	eD120	Retli_jun13 (5963 sequences-1861603 residues)	25 May 2016 at 00:24:45 GMT	hypothetical protein RHE_PD00066 [Rhizobium etli CFN 42]	gi|21492895	53	0.029	14920	9.84	29	5	0.5	http://132.248.34.208/mascot/cgi/master_results.pl?file=../data/20160524/F042821.dat	5601	eD120	37.5	17.1	28.8	27.8	85.1	181.1	7.7	91.3
eD121	eD121	Retli_jun13 (5963 sequences-1861603 residues)	27 Nov 2014 at 01:38:12 GMT	dipeptide ABC transporter- substrate-binding protein [Rhizobium etli CFN 42]	gi|86359571	72	0.00042	60179	5.23	30	13	0.33	http://132.248.34.208/mascot/cgi/master_results.pl?file=../data/20141126/F031867.dat	6708	eD121	80.3	18.9	47.5	48.9	20.6	22	4.9	15.83
D122	eD122	Retli_jun13 (5963 sequences-1861603 residues)	5 Mar 2015 at 23:37:21 GMT	chaperonin GroEL [Rhizobium etli CFN 42]	gi|86356474	54	0.025	57682	5.03	24	8	0.17	http://132.248.34.208/mascot/cgi/master_results.pl?file=../data/20150305/F034373.dat	5711	eD122	7.3	4.2	5	5.5	67.1	436.5	262.1	255.23
D123	eD123	Retli_jun13 (5963 sequences-1861603 residues)	5 Mar 2015 at 23:52:59 GMT	hypothetical protein RHE_CH00301 [Rhizobium etli CFN 42]	gi|86355958	63	0.0027	39455	6.56	9	4	0.18	http://132.248.34.208/mascot/cgi/master_results.pl?file=../data/20150305/F034392.dat	6729	eD123				0	302.5	401	138.7	280.73
D124	eD124	Retli_jun13 (5963 sequences-1861603 residues)	6 Mar 2015 at 22:54:19 GMT	chaperonin GroEL [Rhizobium etli CFN 42]	gi|86356474	99	7.9e-07	57682	5.03	36	12	0.29	http://132.248.34.208/mascot/cgi/master_results.pl?file=../data/20150306/F034508.dat	6731	eD124		116	64.4	90.2	10363.3	9584.6	2907.5	7618.47
eD125	eD125	Retli_jun13 (5963 sequences-1861603 residues)	31 Oct 2014 at 01:10:51 GMT	chaperonin GroEL [Rhizobium etli CFN 42]	gi|86356474	72	0.00035	57682	5.03	18	8	0.18	http://132.248.34.208/mascot/cgi/master_results.pl?file=../data/20141030/F031066.dat	5715	eD125				0	1245.8	1299.2		1272.5
D126	eD126	Retli_jun13 (5963 sequences-1861603 residues)	25 May 2016 at 00:27:50 GMT	chaperonin GroEL [Rhizobium etli CFN 42]	gi|86356474	71	0.00048	57682	5.03	17	7	0.16	http://132.248.34.208/mascot/cgi/master_results.pl?file=../data/20160524/F042824.dat	5724	eD126		2.2	1.4	1.8	121.1		59.5	90.3
D127	eD127	Retli_jun13 (5963 sequences-1861603 residues)	6 Mar 2015 at 00:00:25 GMT	phosphate ABC transporter- substrate-binding protein [Rhizobium etli CFN 42]	gi|86356163	60	0.0056	36299	5.12	37	7	0.25	http://132.248.34.208/mascot/cgi/master_results.pl?file=../data/20150305/F034399.dat	5725	eD127				0	11.6	8.3		9.95
eD129b	eD129	Retli_jun13 (5963 sequences-1861603 residues)	9 Dec 2014 at 02:14:22 GMT	translocation protein TolB [Rhizobium etli CFN 42]	gi|86359053	87	1.1e-05	47861	6.79	14	7	0.19	http://132.248.34.208/mascot/cgi/master_results.pl?file=../data/20141208/F033221.dat	6743	eD129				0	4	3.9		3.95
eD13	eD13	Retli_jun13 (5963 sequences-1861603 residues)	25 Nov 2014 at 22:22:30 GMT	phosphoglyceromutase [Rhizobium etli CFN 42]	gi|86355829	89	7.7e-06	23192	5.75	29	8	0.39	http://132.248.34.208/mascot/cgi/master_results.pl?file=../data/20141125/F031695.dat	2203	eD13	1.7		0.2	0.95	7.4	4.5	17.5	9.8
D131	eD131	Retli_jun13 (5963 sequences-1861603 residues)	7 Mar 2015 at 00:34:24 GMT	zinc ABC transporter substrate-binding protein [Rhizobium etli CFN 42]	gi|86356617	79	8.2e-05	31808	5.09	34	7	0.25	http://132.248.34.208/mascot/cgi/master_results.pl?file=../data/20150306/F034584.dat	4715	eD131				0	3.4	3.5	3.5	3.47
D132	eD132	Retli_jun13 (5963 sequences-1861603 residues)	6 Mar 2015 at 00:18:36 GMT	chaperonin GroEL [Rhizobium etli CFN 42]	gi|86356879	96	1.5e-06	57656	5.17	23	11	0.26	http://132.248.34.208/mascot/cgi/master_results.pl?file=../data/20150305/F034412.dat	5718	eD132	4.3	0.7	3.6	2.87	2.5	190.8	60.1	84.47
D133	eD133	Retli_jun13 (5963 sequences-1861603 residues)	7 Mar 2015 at 00:21:37 GMT	autoaggregation protein (adhering protein) [Rhizobium etli CFN 42]	gi|86357999	76	0.00014	30215	4.31	20	7	0.22	http://132.248.34.208/mascot/cgi/master_results.pl?file=../data/20150306/F034575.dat	5717	eD133	3.8	1.3	2	2.37	18.5	2.6	9.6	10.23
D134	eD134	Retli_jun13 (5963 sequences-1861603 residues)	7 Mar 2015 at 01:18:04 GMT	autoaggregation protein (adhering protein) [Rhizobium etli CFN 42]	gi|86357999	64	0.0022	30215	4.31	16	5	0.17	http://132.248.34.208/mascot/cgi/master_results.pl?file=../data/20150306/F034602.dat	4719	eD134	0.6	1.7	1.3	1.2	164.4	9	1.8	58.4
eD139	eD139	Retli_jun13 (5963 sequences-1861603 residues)	28 Nov 2014 at 03:27:39 GMT	phosphoenolpyruvate carboxykinase [Rhizobium etli CFN 42]	gi|86355705	154	2.4e-12	57925	5.65	39	18	0.46	http://132.248.34.208/mascot/cgi/master_results.pl?file=../data/20141127/F032039.dat	2704	eD139	8.9	19.4	5.6	11.3	807.2	794.9	353.2	651.77
eD140	eD140	Retli_jun13 (5963 sequences-1861603 residues)	2 Dec 2014 at 00:30:20 GMT	phosphoenolpyruvate carboxykinase [Rhizobium etli CFN 42]	gi|86355705	94	2.2e-06	57925	5.65	35	12	0.32	http://132.248.34.208/mascot/cgi/master_results.pl?file=../data/20141201/F032167.dat	3703	eD140	10.1	27.4	7.8	15.1	159.1	178.2	560.1	299.13
eD141 mix2	eD141	Retli_jun13 (5963 sequences-1861603 residues)	3 Dec 2014 at 21:21:44 GMT	cobalamin biosynthesis protein [Rhizobium etli CFN 42]	gi|86359403▀	115	1.9e-14	70459	4.69	23	7	0.15	http://132.248.34.208/mascot/cgi/master_results.pl?file=../data/20141203/F032542.dat	3706	eD141	5.7	22.8		14.25	60.6	54.8	191.3	102.23
eD141 mix1	eD141	Retli_jun13 (5963 sequences-1861603 residues)	3 Dec 2014 at 21:21:44 GMT	phosphoenolpyruvate carboxykinase [Rhizobium etli CFN 42]	gi|86355705	115	1.9e-14	57925	5.65	23	10	0.24	http://132.248.34.208/mascot/cgi/master_results.pl?file=../data/20141203/F032542.dat	3706	eD141	5.7	22.8		14.25	60.6	54.8	191.3	102.23
D142	eD142	Retli_jun13 (5963 sequences-1861603 residues)	25 May 2016 at 00:51:48 GMT	hypothetical protein RHE_CH00450 [Rhizobium etli CFN 42]	gi|86356106	60	0.0064	45434	8.88	21	5	0.16	http://132.248.34.208/mascot/cgi/master_results.pl?file=../data/20160524/F042838.dat	3904	eD142				0	393.7		4.5	199.1
D143	eD143	Retli_jun13 (5963 sequences-1861603 residues)	25 May 2016 at 00:55:36 GMT	hypothetical protein RHE_CH00450 [Rhizobium etli CFN 42]	gi|86356106	58	0.0099	45434	8.88	17	5	0.15	http://132.248.34.208/mascot/cgi/master_results.pl?file=../data/20160524/F042841.dat	3830	eD143				0	461.5		3.6	232.55
D144	eD144	Retli_jun13 (5963 sequences-1861603 residues)	25 May 2016 at 00:56:38 GMT	hypothetical protein RHE_CH00450 [Rhizobium etli CFN 42]	gi|86356106	56	0.015	45434	8.88	18	6	0.17	http://132.248.34.208/mascot/cgi/master_results.pl?file=../data/20160524/F042842.dat	3829	eD144				0	3378.1	5473.1		4425.6
eD145	eD145	Retli_jun13 (5963 sequences-1861603 residues)	31 Oct 2014 at 17:13:10 GMT	hypothetical protein RHE_CH00301 [Rhizobium etli CFN 42]	gi|86355958	64	0.0024	39455	6.56	21	6	0.29	http://132.248.34.208/mascot/cgi/master_results.pl?file=../data/20141031/F031154.dat	4830	eD145				0	1277.9	1421.4		1349.65
eD147	eD147	Retli_jun13 (5963 sequences-1861603 residues)	3 Dec 2014 at 21:36:20 GMT	peptide ABC transporter substrate-binding protein [Rhizobium etli CFN 42]	gi|86359973	53	0.028	56160	5.01	22	9	0.2	http://132.248.34.208/mascot/cgi/master_results.pl?file=../data/20141203/F032564.dat	6825	eD147				0	154.2	214.8		184.5
eD149	eD149	Retli_jun13 (5963 sequences-1861603 residues)	31 Oct 2014 at 23:35:43 GMT	protease II protein [Rhizobium etli CFN 42]	gi|86356866	111	4.7e-08	78119	5.1	30	15	0.23	http://132.248.34.208/mascot/cgi/master_results.pl?file=../data/20141031/F031311.dat	5802	eD149	4	6.8	3.5	4.77	165.6	172.9	189	175.83
eD15	eD15	Retli_jun13 (5963 sequences-1861603 residues)	26 Nov 2014 at 18:27:02 GMT	3-hydroxydecanoyl-(acyl carrier protein) dehydratase [Rhizobium etli CFN 42]	gi|86355767	55	0.017	19215	5.35	20	4	0.28	http://132.248.34.208/mascot/cgi/master_results.pl?file=../data/20141126/F031718.dat	4120	eD15	0.1	0.1	0.2	0.13	7.4	8.2	7.8	7.8
D150	eD150	Retli_jun13 (5963 sequences-1861603 residues)	25 May 2016 at 16:49:24 GMT	polynucleotide phosphorylase/polyadenylase [Rhizobium etli CFN 42]	gi|86355771	87	1.2e-05	77491	5.2	16	7	0.12	http://132.248.34.208/mascot/cgi/master_results.pl?file=../data/20160525/F042862.dat	4813	eD150	2.3	11.9	5.4	6.53	325.2	770.7	343.8	479.9
eDr154	eD154	Retli_jun13 (5963 sequences-1861603 residues)	3 Nov 2014 at 17:20:09 GMT	catalase [Rhizobium etli CFN 42]	gi|86360738	65	0.0019	79878	5.71	27	9	0.18	http://132.248.34.208/mascot/cgi/master_results.pl?file=../data/20141103/F031334.dat	2804	eD154	1.4	2	1.4	1.6	8.8	9.4	5.3	7.83
eD155	eD155	Retli_jun13 (5963 sequences; 1861603 residues)	23 Mar 2017 at 00:18:42 GMT	malate synthase G [Rhizobium etli CFN 42]	gi|86355720	63	0.003	80077	5.62	11	9	0.19	http://132.248.34.208/mascot/cgi/master_results.pl?file=../data/20170322/F044272.dat	3801	eD155	1.7	4.1	1.3	2.37	6.9	8.3	16.4	10.53
eD159	eD159	Retli_jun13 (5963 sequences-1861603 residues)	3 Dec 2014 at 18:42:05 GMT	AraC family transcriptional regulator [Rhizobium etli CFN 42]	gi|86360635	51	0.047	42636	6.43	16	6	0.25	http://132.248.34.208/mascot/cgi/master_results.pl?file=../data/20141203/F032437.dat	4727	eD159				0	10.1	14.8	0	8.3
eD16	eD16	Retli_jun13 (5963 sequences-1861603 residues)	28 Nov 2014 at 02:37:47 GMT	cytosine deaminase [Rhizobium etli CFN 42]	gi|86359986	55	0.019	47359	5.48	40	9	0.23	http://132.248.34.208/mascot/cgi/master_results.pl?file=../data/20141127/F031988.dat	4121	eD16				0	47.7	71.2	0.1	39.67
eD160	eD160	Retli_jun13 (5963 sequences-1861603 residues)	2 Dec 2014 at 20:18:01 GMT	LysR family NOD transcriptional regulator protein [Rhizobium etli CFN 42]	gi|21493002	60	0.0054	35842	6.02	31	8	0.27	http://132.248.34.208/mascot/cgi/master_results.pl?file=../data/20141202/F032340.dat	4703	eD160	1.2	1.1	0.6	0.97	25.9	21.5	2.8	16.73
D164	eD164	Retli_jun13 (5963 sequences-1861603 residues)	25 May 2016 at 19:24:33 GMT	hypothetical protein RHE_CH00301 [Rhizobium etli CFN 42]	gi|86355958	65	0.0018	39441	6.56	16	6	0.26	http://132.248.34.208/mascot/cgi/master_results.pl?file=../data/20160525/F042892.dat	4622	eD164				0	9.7	4.7		7.2
eD167	eD167	Retli_jun13 (5963 sequences; 1861603 residues)	23 Mar 2017 at 00:19:12 GMT	3-oxoacyl-(acyl carrier protein) reductase [Rhizobium etli CFN 42]	gi|86356501	54	0.022	27387	6.1	19	5	0.25	http://132.248.34.208/mascot/cgi/master_results.pl?file=../data/20170322/F044273.dat	3641	eD167				0	4.4	7.6		6
eD170	eD170	Retli_jun13 (5963 sequences-1861603 residues)	1 Dec 2014 at 18:48:23 GMT	cobalt-precorrin-6x reductase [Rhizobium etli CFN 42]	gi|86360725	65	0.0018	27506	9.92	11	5	0.36	http://132.248.34.208/mascot/cgi/master_results.pl?file=../data/20141201/F032070.dat	3819	eD170	0.6	1.1	0.7	0.8	5.2	4.4	7.7	5.77
D172	eD172	Retli_jun13 (5963 sequences-1861603 residues)	25 May 2016 at 20:37:46 GMT	polynucleotide phosphorylase/polyadenylase [Rhizobium etli CFN 42]	gi|86355771	69	0.0008	77491	5.2	20	5	0.09	http://132.248.34.208/mascot/cgi/master_results.pl?file=../data/20160525/F042906.dat	4815	eD172	3.8	7.3	3.1	4.73	21.3	5	111.7	46
D173	eD173	Retli_jun13 (5963 sequences-1861603 residues)	25 May 2016 at 19:40:14 GMT	protease II protein [Rhizobium etli CFN 42]	gi|86356866	58	0.0099	78119	5.1	15	5	0.07	http://132.248.34.208/mascot/cgi/master_results.pl?file=../data/20160525/F042900.dat	5805	eD173	1.4	2.1	1.3	1.6	4.3	4.5	2.6	3.8
eD175	eD175	Retli_jun13 (5963 sequences-1861603 residues)	31 Oct 2014 at 20:56:26 GMT	dipeptide ABC transporter- substrate-binding protein [Rhizobium etli CFN 42]	gi|86356385	60	0.0061	58652	5.12	20	7	0.17	http://132.248.34.208/mascot/cgi/master_results.pl?file=../data/20141031/F031231.dat	6707	eD175	823.3	508.7	517.5	616.5	27.2		321.9	174.55
eDr179	eD179	Retli_jun13 (5963 sequences-1861603 residues)	3 Nov 2014 at 18:22:38 GMT	glyceraldehyde 3-phosphate dehydrogenase [Rhizobium etli CFN 42]	gi|86359087	124	2.4e-09	36016	6.87	24	11	0.5	http://132.248.34.208/mascot/cgi/master_results.pl?file=../data/20141103/F031385.dat	1502	eD179	11.3	4.8		8.05	85	94.7	396.5	192.07
eDr180	eD180	Retli_jun13 (5963 sequences-1861603 residues)	3 Nov 2014 at 18:31:21 GMT	glyceraldehyde 3-phosphate dehydrogenase [Rhizobium etli CFN 42]	gi|86359087	71	0.00044	36016	6.87	14	12	0.26	http://132.248.34.208/mascot/cgi/master_results.pl?file=../data/20141103/F031392.dat	1501	eD180	16.8	2.2	0	6.33	1136.7	1035		1085.85
eD19	eD19	Retli_jun13 (5963 sequences-1861603 residues)	26 Nov 2014 at 18:40:04 GMT	hydroxyacylgluthatione hydrolase [Rhizobium etli CFN 42]	gi|86359395	96	1.6e-06	28826	5.42	34	9	0.44	http://132.248.34.208/mascot/cgi/master_results.pl?file=../data/20141126/F031726.dat	3311	eD19		3.7	0.4	2.05	18.5	14.5	27.1	20.03
D2	eD2	Retli_jun13 (5963 sequences-1861603 residues)	27 Jan 2016 at 20:25:25 GMT	nucleoside diphosphate kinase [Rhizobium etli CFN 42]	gi|86357110	88	9.5e-06	15256	5.94	23	8	0.4	http://132.248.34.208/mascot/cgi/master_results.pl?file=../data/20160127/F041596.dat	1213	eD2	7.2	13.2	3.7	8.03	190.1	156	132.1	159.4
eD20	eD20	Retli_jun13 (5963 sequences-1861603 residues)	24 Oct 2014 at 10:31:50 GMT	hypothetical protein RHE_CH02456 [Rhizobium etli CFN 42]	gi|86358068	66	0.0015	28048	5.64	16	5	0.19	http://132.248.34.208/mascot/cgi/master_results.pl?file=../data/20141024/F030706.dat	2305	eD20	9.3	15.4	6.3	10.33	97.9	8.5		53.2
eD21	eD21	Retli_jun13 (5963 sequences-1861603 residues)	28 Nov 2014 at 03:02:50 GMT	elongation factor Tu [Rhizobium etli CFN 42]	gi|86357289	61	0.0047	42782	5.29	32	7	0.21	http://132.248.34.208/mascot/cgi/master_results.pl?file=../data/20141127/F032018.dat	2219	eD21				0	24	63	43.2	43.4
eD23mix22	eD23	Retli_jun13 (5963 sequences-1861603 residues)	26 Nov 2014 at 20:12:18 GMT	oxidoreductase [Rhizobium etli CFN 42]	gi|86359505	70	0.00056	31420	5.75	20	5	0.23	http://132.248.34.208/mascot/cgi/master_results.pl?file=../data/20141126/F031761.dat	2310	eD23	2.7	2.6	0.2	1.83	18.6	17.9	14.3	16.93
eD25	eD25	Retli_jun13 (5963 sequences-1861603 residues)	3 Dec 2014 at 22:17:01 GMT	hypothetical protein RHE_CH02559 [Rhizobium etli CFN 42]	gi|86358168	72	0.00042	30125	5.93	29	6	0.32	http://132.248.34.208/mascot/cgi/master_results.pl?file=../data/20141203/F032616.dat	3334	eD25				0	33.8	37.8		35.8
d252	eD252	Retli_jun13 (5963 sequences-1861603 residues)	23 Feb 2016 at 23:19:09 GMT	amino acid ABC transporter substrate-binding protein [Rhizobium etli CFN 42]	gi|86359585	68	0.0009	27631	5.56	14	5	0.26	http://132.248.34.208/mascot/cgi/master_results.pl?file=../data/20160223/F042085.dat	5202	eD252	43.7	52	48.9	48.2	3.7	2.9	15.9	7.5
d253	eD253	Retli_jun13 (5963 sequences-1861603 residues)	24 Feb 2016 at 18:09:12 GMT	outer membrane protein [Rhizobium etli CFN 42]	gi|86357119	55	0.017	22322	4.55	14	6	0.36	http://132.248.34.208/mascot/cgi/master_results.pl?file=../data/20160224/F042101.dat	8202	eD253	1118.3	4325.5	2238.8	2560.87	420.2	2.6	683.7	368.83
d254	eD254	Retli_jun13 (5963 sequences-1861603 residues)	24 Feb 2016 at 18:19:32 GMT	insertion sequence transposase [Rhizobium etli CFN 42]	gi|89255399	59	0.0079	27573	11.19	14	6	0.32	http://132.248.34.208/mascot/cgi/master_results.pl?file=../data/20160224/F042110.dat	8204	eD254	226.4	1250.3	589.9	688.87	133.4	461.7	117.2	237.43
d255	eD255	Retli_jun13 (5963 sequences-1861603 residues)	24 Feb 2016 at 18:23:44 GMT	amino acid ABC transporter- substrate-binding protein [Rhizobium etli CFN 42]	gi|86359543	70	0.00064	28915	4.79	18	6	0.18	http://132.248.34.208/mascot/cgi/master_results.pl?file=../data/20160224/F042114.dat	8302	eD255	407.4	388.4	482	425.93	81.9	77.2	234.7	131.27
d256	eD256	Retli_jun13 (5963 sequences-1861603 residues)	24 Feb 2016 at 18:38:45 GMT	hypothetical protein RHE_CH00301 [Rhizobium etli CFN 42]	gi|86355958	55	0.018	39455	6.56	22	5	0.25	http://132.248.34.208/mascot/cgi/master_results.pl?file=../data/20160224/F042131.dat	6315	eD256	683.5	1795.1	1650.4	1376.33	37.5	35.2		36.35
d257	eD257	Retli_jun13 (5963 sequences-1861603 residues)	24 Feb 2016 at 19:20:15 GMT	general L-amino acid ABC transporter- substrate-binding protein [Rhizobium etli CFN 42]	gi|86357519	94	2.4e-06	37697	5.44	21	8	0.21	http://132.248.34.208/mascot/cgi/master_results.pl?file=../data/20160224/F042147.dat	6301	eD257	137	44.3	305.3	162.2	30.2	16.9	23.2	23.43
d258	eD258	Retli_jun13 (5963 sequences-1861603 residues)	24 Feb 2016 at 18:49:06 GMT	alpha-glucoside ABC transporter- substrate-binding protein [Rhizobium etli CFN 42]	gi|86356347	85	1.9e-05	49195	4.91	20	7	0.18	http://132.248.34.208/mascot/cgi/master_results.pl?file=../data/20160224/F042138.dat	6405	eD258	1030.9	915.9	624.3	857.03	423.4	609.8	767.7	600.3
d266	eD266	Retli_jun13 (5963 sequences-1861603 residues)	24 Feb 2016 at 23:47:51 GMT	spermidine/putrescine ABC transporter- substrate-binding protein [Rhizobium etli CFN 42]	gi|86356365	70	0.00065	40569	5	19	6	0.2	http://132.248.34.208/mascot/cgi/master_results.pl?file=../data/20160224/F042210.dat	7508	eD266	20.6	7.6	21.9	16.7	3.3	1.6	0.5	1.8
d268 mix1	eD268	Retli_jun13 (5963 sequences-1861603 residues)	25 Feb 2016 at 00:08:45 GMT	alpha-glucoside ABC transporter, substrate-binding protein [Rhizobium etli CFN 42]	gi|86356347	81	2.4e-10	49195	4.91	26	7	0.16	http://132.248.34.208/mascot/cgi/master_results.pl?file=../data/20160224/F042237.dat	7603	eD268	62.7	70.8	63.6	65.7	196.6	248.4	65.8	170.27
d268 mix2	eD268	Retli_jun13 (5963 sequences-1861603 residues)	25 Feb 2016 at 00:08:45 GMT	phosphopyruvate hydratase [Rhizobium etli CFN 42]	gi|86356347	81	2.4e-10	44868	4.75	26	5	0.12	http://132.248.34.208/mascot/cgi/master_results.pl?file=../data/20160224/F042237.dat	7603	eD268	62.7	70.8	63.6	65.7	196.6	248.4	65.8	170.27
d269	eD269	Retli_jun13 (5963 sequences-1861603 residues)	25 Feb 2016 at 00:12:10 GMT	alpha-glucoside ABC transporter- substrate-binding protein [Rhizobium etli CFN 42]	gi|86356347	82	4.2e-05	49195	4.91	31	10	0.23	http://132.248.34.208/mascot/cgi/master_results.pl?file=../data/20160224/F042239.dat	7602	eD269	517.6	394.9	345.3	419.27	1938.5	2006.7	543.9	1496.37
eD27	eD27	Retli_jun13 (5963 sequences-1861603 residues)	26 Nov 2014 at 21:32:01 GMT	N-acetylglucosaminyltransferase [Rhizobium etli CFN 42]	gi|21492687	56	0.014	49515	8.85	22	6	0.18	http://132.248.34.208/mascot/cgi/master_results.pl?file=../data/20141126/F031809.dat	5321	eD27				0	7.3	8.2		7.75
d271	eD271	Retli_jun13 (5963 sequences-1861603 residues)	25 Feb 2016 at 17:05:38 GMT	sugar ABC transporter- ATP-binding protein [Rhizobium etli CFN 42]	gi|86356147	67	0.0012	56392	7.32	19	6	0.17	http://132.248.34.208/mascot/cgi/master_results.pl?file=../data/20160225/F042241.dat	7703	eD271	6.5	41	12.3	19.93	7.2	3.4	3.1	4.57
d274	eD274	Retli_jun13 (5963 sequences-1861603 residues)	25 Feb 2016 at 17:29:24 GMT	fructose-bisphosphate aldolase [Rhizobium etli CFN 42]	gi|86359091	78	9.7e-05	37064	5.86	16	5	0.19	http://132.248.34.208/mascot/cgi/master_results.pl?file=../data/20160225/F042254.dat	3404	eD274	23.3	19.9	11.1	18.1	10.2	6.6	5	7.27
d275	eD275	Retli_jun13 (5963 sequences-1861603 residues)	25 Feb 2016 at 17:35:00 GMT	ABC transporter- substrate-binding protein [Rhizobium etli CFN 42]	gi|86357703	55	0.018	38904	5.94	18	5	0.17	http://132.248.34.208/mascot/cgi/master_results.pl?file=../data/20160225/F042259.dat	3503	eD275	140.1	22	29	63.7	14.6	14.3	10.9	13.27
d278	eD278	Retli_jun13 (5963 sequences-1861603 residues)	25 Feb 2016 at 17:42:11 GMT	xylose isomerase [Rhizobium etli CFN 42]	gi|86359238	81	4.8e-05	49170	5.48	12	7	0.14	http://132.248.34.208/mascot/cgi/master_results.pl?file=../data/20160225/F042268.dat	3611	eD278	3.1	5.8	3.3	4.07	18.3	42.8	43.2	34.77
eD28	eD28	Retli_jun13 (5963 sequences-1861603 residues)	28 Nov 2014 at 01:48:00 GMT	hypothetical protein RHE_PF00461 [Rhizobium etli CFN 42]	gi|86361191	77	0.00013	43358	6.32	31	9	0.26	http://132.248.34.208/mascot/cgi/master_results.pl?file=../data/20141127/F031953.dat	5320	eD28				0	103.2	46.3		74.75
d280	eD280	Retli_jun13 (5963 sequences-1861603 residues)	25 Feb 2016 at 17:48:09 GMT	branched-chain amino acid aminotransferase [Rhizobium etli CFN 42]	gi|86358335	71	0.00053	39819	5.89	9	5	0.14	http://132.248.34.208/mascot/cgi/master_results.pl?file=../data/20160225/F042272.dat	2501	eD280	2.6	4.2	1.7	2.83	16.2	16.9	11.9	15
d281	eD281	Retli_jun13 (5963 sequences-1861603 residues)	25 Feb 2016 at 17:56:17 GMT	translocation protein TolB [Rhizobium etli CFN 42]	gi|86359053	127	1.2e-09	47861	6.79	24	10	0.29	http://132.248.34.208/mascot/cgi/master_results.pl?file=../data/20160225/F042275.dat	2609	eD281	189.8	57.2	244.2	163.73	3.4	5.4	45.1	17.97
D284	eD284	Retli_jun13 (5963 sequences-1861603 residues)	28 Jan 2016 at 01:05:26 GMT	glucose-6-phosphate isomerase [Rhizobium etli CFN 42]	gi|86356133	63	0.0033	58581	6.25	14	6	0.11	http://132.248.34.208/mascot/cgi/master_results.pl?file=../data/20160127/F041751.dat	1702	eD284	5.6	6.4	2.7	4.9	18.9	20.1	10.9	16.63
eD29	eD29	Retli_jun13 (5963 sequences-1861603 residues)	31 Oct 2014 at 21:58:50 GMT	chromosome partition protein [Rhizobium etli CFN 42]	gi|86356646	54	0.023	127155	5.12	21	9	0.09	http://132.248.34.208/mascot/cgi/master_results.pl?file=../data/20141031/F031281.dat	5322	eD29				0	21.1	5.3		13.2
D30	eD30	Retli_jun13 (5963 sequences-1861603 residues)	10 Mar 2016 at 20:14:05 GMT	fructose-bisphosphate aldolase [Rhizobium etli CFN 42]	gi|86359091	140	6e-11	37064	5.86	20	12	0.35	http://132.248.34.208/mascot/cgi/master_results.pl?file=../data/20160310/F042621.dat	2402	eD30	64.6	33.7	20	39.43	2942.3	2925.6	1365.7	2411.2
eD31	eD31	Retli_jun13 (5963 sequences-1861603 residues)	28 Nov 2014 at 01:52:41 GMT	fructose-bisphosphate aldolase [Rhizobium etli CFN 42]	gi|86359091	111	4.7e-08	37064	5.86	32	12	0.3	http://132.248.34.208/mascot/cgi/master_results.pl?file=../data/20141127/F031954.dat	2406	eD31	3.9	4.9	3.4	4.07	99.5	83.7	43.1	75.43
eD32	eD32	Retli_jun13 (5963 sequences-1861603 residues)	2 Dec 2014 at 00:37:19 GMT	cysteine synthase [Rhizobium etli CFN 42]	gi|86355982	107	1.2e-07	33573	5.73	36	9	0.37	http://132.248.34.208/mascot/cgi/master_results.pl?file=../data/20141201/F032172.dat	2404	eD32	2.7	4.6	1.9	3.07	44.6	104.5	25.2	58.1
eD33	eD33	Retli_jun13 (5963 sequences-1861603 residues)	31 Oct 2014 at 22:08:32 GMT	malate dehydrogenase [Rhizobium etli CFN 42]	gi|86359472	57	0.011	33850	5.53	26	8	0.18	http://132.248.34.208/mascot/cgi/master_results.pl?file=../data/20141031/F031288.dat	3504	eD33	6.3	3.3	7.9	5.83	17.5	179	409	201.83
eD35	eD35	Retli_jun13 (5963 sequences-1861603 residues)	26 Nov 2014 at 21:44:06 GMT	acetylornithine transaminase [Rhizobium etli CFN 42]	gi|86356170	91	4.5e-06	42574	5.87	16	6	0.19	http://132.248.34.208/mascot/cgi/master_results.pl?file=../data/20141126/F031822.dat	2503	eD35	1.6	2.3	1.4	1.77	7.8	7.4	10.6	8.6
eD36	eD36	Retli_jun13 (5963 sequences-1861603 residues)	26 Nov 2014 at 22:00:45 GMT	sugar ABC transporter substrate-binding protein [Rhizobium etli CFN 42]	gi|86360824	109	7.5e-08	47756	6.68	34	12	0.32	http://132.248.34.208/mascot/cgi/master_results.pl?file=../data/20141126/F031829.dat	2502	eD36	37.4	30.1	21.4	29.63	7.9	7.5	9.2	8.2
D4	eD4	Retli_jun13 (5963 sequences-1861603 residues)	10 Mar 2016 at 17:57:43 GMT	LysR family transcriptional regulator [Rhizobium etli CFN 42]	gi|86360342	55	0.019	33410	6.99	7	4	0.14	http://132.248.34.208/mascot/cgi/master_results.pl?file=../data/20160310/F042586.dat	6214	eD4				0	2432	2093.1	5.8	1510.3
eD45	eD45	Retli_jun13 (5963 sequences-1861603 residues)	3 Dec 2014 at 22:36:29 GMT	aspartate aminotransferase [Rhizobium etli CFN 42]	gi|86358600	83	2.9e-05	43842	5.8	25	9	0.27	http://132.248.34.208/mascot/cgi/master_results.pl?file=../data/20141203/F032657.dat	2602	eD45	4.5	8.9	4.8	6.07	56	60.9	33.8	50.23
eD48	eD48	Retli_jun13 (5963 sequences-1861603 residues)	2 Dec 2014 at 01:24:15 GMT	O-succinylhomoserine sulfhydrylase [Rhizobium etli CFN 42]	gi|86356176	117	1.2e-08	42927	6.04	37	13	0.34	http://132.248.34.208/mascot/cgi/master_results.pl?file=../data/20141201/F032220.dat	1508	eD48	1.9	2	1.6	1.83	18.7	17.3	8.1	14.7
eD49	eD49	Retli_jun13 (5963 sequences-1861603 residues)	2 Dec 2014 at 18:12:32 GMT	glucokinase [Rhizobium etli CFN 42]	gi|86355832	104	2.4e-07	36575	5.92	22	7	0.38	http://132.248.34.208/mascot/cgi/master_results.pl?file=../data/20141202/F032254.dat	1515	eD49	2.7	1.1	0.6	1.47	7.9	7.9	6.3	7.37
eD50	eD50	Retli_jun13 (5963 sequences-1861603 residues)	3 Dec 2014 at 23:01:42 GMT	sugar ABC transporter- substrate-binding protein [Rhizobium etli CFN 42]	gi|86357192	65	0.0021	48116	5.4	25	15	0.35	http://132.248.34.208/mascot/cgi/master_results.pl?file=../data/20141203/F032687.dat	607	eD50				0	48.2	2.4	0	16.87
eD51	eD51	Retli_jun13 (5963 sequences-1861603 residues)	2 Dec 2014 at 18:33:05 GMT	argininosuccinate synthase [Rhizobium etli CFN 42]	gi|86359504	122	3.8e-09	45185	5.81	42	15	0.4	http://132.248.34.208/mascot/cgi/master_results.pl?file=../data/20141202/F032264.dat	2606	eD51	3.1	3.3	1.7	2.7	13.4	24.2	1.6	13.07
eD52	eD52	Retli_jun13 (5963 sequences-1861603 residues)	2 Dec 2014 at 19:29:17 GMT	methylmalonate-semialdehyde dehydrogenase (acylating) protein [Rhizobium etli CFN 42]	gi|86356380	56	0.014	53836	5.93	22	7	0.21	http://132.248.34.208/mascot/cgi/master_results.pl?file=../data/20141202/F032290.dat	2633	eD52	0.6	0.7	0.9	0.73	7.1	6	5.4	6.17
eD54	eD54	Retli_jun13 (5963 sequences-1861603 residues)	2 Dec 2014 at 19:50:51 GMT	fumarate hydratase class I protein [Rhizobium etli CFN 42]	gi|86358000	81	5e-05	55227	6.16	16	6	0.17	http://132.248.34.208/mascot/cgi/master_results.pl?file=../data/20141202/F032323.dat	1707	eD54	0.5	0.5	0.4	0.47	6.8	6	4	5.6
eD55	eD55	Retli_jun13 (5963 sequences-1861603 residues)	3 Dec 2014 at 23:09:34 GMT	dihydroxy-acid dehydratase [Rhizobium etli CFN 42]	gi|86358761	90	6e-06	63046	5.92	26	8	0.16	http://132.248.34.208/mascot/cgi/master_results.pl?file=../data/20141203/F032698.dat	1705	eD55	0.8	1.1	0.8	0.9	8.1	9.2	5.2	7.5
d56	eD56	Retli_jun13 (5963 sequences-1861603 residues)	21 Oct 2015 at 17:53:28 GMT	two-component response regulator protein [Rhizobium etli CFN 42]	gi|86355704	53	0.032	28099	5.56	16	5	0.27	http://132.248.34.208/mascot/cgi/master_results.pl?file=../data/20151021/F039878.dat	2608	eD56	25.5	35.6	25.9	29	698.5	663.8	445.4	602.57
eD57	eD57	Retli_jun13 (5963 sequences-1861603 residues)	3 Dec 2014 at 19:49:04 GMT	serine acetyltransferase [Rhizobium etli CFN 42]	gi|86357524	71	0.00047	30515	6.36	20	6	0.26	http://132.248.34.208/mascot/cgi/master_results.pl?file=../data/20141203/F032484.dat	2521	eD57	0.1	0.3	0.3	0.23	33.2	9.8	1	14.67
eD58	eD58	Retli_jun13 (5963 sequences-1861603 residues)	3 Dec 2014 at 19:56:44 GMT	serine acetyltransferase [Rhizobium etli CFN 42]	gi|86357524	61	0.0044	30515	6.36	20	7	0.26	http://132.248.34.208/mascot/cgi/master_results.pl?file=../data/20141203/F032492.dat	2614	eD58	2.6	4.8	6.4	4.6	35.2	50.1	38.2	41.17
D6	eD6	Retli_jun13 (5963 sequences-1861603 residues)	10 Mar 2016 at 18:20:12 GMT	superoxide dismutase [Rhizobium etli CFN 42]	gi|86356843	74	0.00027	22447	5.83	9	5	0.53	http://132.248.34.208/mascot/cgi/master_results.pl?file=../data/20160310/F042596.dat	2202	eD6	58.3	64.1	34.9	52.43	4568.8	3777.5	1627.6	3324.63
d62	eD62	Retli_jun13 (5963 sequences-1861603 residues)	21 Oct 2015 at 18:28:07 GMT	hypothetical protein RHE_CH00301 [Rhizobium etli CFN 42]	gi|86355958	52	0.037	39455	6.56	17	5	0.25	http://132.248.34.208/mascot/cgi/master_results.pl?file=../data/20151021/F039889.dat	3523	eD62				0	6032.6	4308.5		5170.55
D63	eD63	Retli_jun13 (5963 sequences-1861603 residues)	10 Mar 2016 at 23:18:23 GMT	plasmid partitioning protein RepAf2 [Rhizobium etli CFN 42]	gi|86360945	62	0.0035	44161	5.73	15	4	0.14	http://132.248.34.208/mascot/cgi/master_results.pl?file=../data/20160310/F042634.dat	3521	eD63				0	2245.7	1720.1		1982.9
eD64	eD64	Retli_jun13 (5963 sequences-1861603 residues)	30 Oct 2014 at 00:18:07 GMT	chaperonin GroEL [Rhizobium etli CFN 42]	gi|86356879	60	0.0054	57656	5.17	18	6	0.13	http://132.248.34.208/mascot/cgi/master_results.pl?file=../data/20141029/F030892.dat	3414	eD64				0	16.5	130.3		73.4
eD65	eD65	Retli_jun13 (5963 sequences-1861603 residues)	3 Dec 2014 at 23:18:48 GMT	L-lactate dehydrogenase (cytochrome) protein [Rhizobium etli CFN 42]	gi|86356082	62	0.0039	42641	7.68	19	7	0.27	http://132.248.34.208/mascot/cgi/master_results.pl?file=../data/20141203/F032707.dat	3520	eD65				0	7.7	9.3	0.9	5.97
eD66	eD66	Retli_jun13 (5963 sequences-1861603 residues)	30 Oct 2014 at 02:10:14 GMT	amino acid ABC transporter substrate-binding protein [Rhizobium etli CFN 42]	gi|86361037	64	0.0022	36126	5.38	17	6	0.27	http://132.248.34.208/mascot/cgi/master_results.pl?file=../data/20141029/F030926.dat	3522	eD66				0	35.2	22.1		28.65
eD67	eD67	Retli_jun13 (5963 sequences-1861603 residues)	3 Dec 2014 at 23:30:00 GMT	chaperonin GroEL [Rhizobium etli CFN 42]	gi|86356879	60	0.0067	57656	5.17	17	7	0.14	http://132.248.34.208/mascot/cgi/master_results.pl?file=../data/20141203/F032724.dat	3415	eD67				0	45.6	51.2		48.4
eD68	eD68	Retli_jun13 (5963 sequences-1861603 residues)	3 Dec 2014 at 23:22:52 GMT	phosphoserine aminotransferase [Rhizobium etli CFN 42]	gi|86359046	123	3e-09	42656	5.4	34	13	0.41	http://132.248.34.208/mascot/cgi/master_results.pl?file=../data/20141203/F032715.dat	4519	eD68	1	0.9	1.3	1.07	44.9	40.1	64.3	49.77
eD69	eD69	Retli_jun13 (5963 sequences-1861603 residues)	3 Dec 2014 at 23:38:08 GMT	glyceraldehyde 3-phosphate dehydrogenase [Rhizobium etli CFN 42]	gi|86359087	55	0.02	36016	6.87	24	5	0.27	http://132.248.34.208/mascot/cgi/master_results.pl?file=../data/20141203/F032731.dat	4523	eD69				0	6.3	22.8	0	9.7
eD7	eD7	Retli_jun13 (5963 sequences-1861603 residues)	31 Oct 2014 at 22:39:38 GMT	peptidyl prolyl cis-trans isomerase B signal peptide protein [Rhizobium etli CFN 42]	gi|86357734	54	0.022	18636	5.63	20	4	0.21	http://132.248.34.208/mascot/cgi/master_results.pl?file=../data/20141031/F031297.dat	3206	eD7	2.4	4.7	3.2	3.43	270.5	262.9	160.9	231.43
eD70	eD70	Retli_jun13 (5963 sequences-1861603 residues)	3 Dec 2014 at 23:55:38 GMT	adenylosuccinate synthetase [Rhizobium etli CFN 42]	gi|86358942	147	1.2e-11	46579	5.4	32	13	0.39	http://132.248.34.208/mascot/cgi/master_results.pl?file=../data/20141203/F032760.dat	3610	eD70	1.6	2.7	2.6	2.3	46.3	189.9	46	94.07
eD71	eD71	Retli_jun13 (5963 sequences-1861603 residues)	3 Dec 2014 at 21:09:43 GMT	3-oxoacyl-(acyl carrier protein) synthase II [Rhizobium etli CFN 42]	gi|86357083	104	2.4e-07	44361	5.36	25	10	0.34	http://132.248.34.208/mascot/cgi/master_results.pl?file=../data/20141203/F032533.dat	3615	eD71	0.5	0.7	0.7	0.63	15	15.9	14.6	15.17
eD72	eD72	Retli_jun13 (5963 sequences-1861603 residues)	3 Dec 2014 at 20:20:14 GMT	xylose isomerase [Rhizobium etli CFN 42]	gi|86359238	57	0.013	49170	5.48	19	6	0.14	http://132.248.34.208/mascot/cgi/master_results.pl?file=../data/20141203/F032522.dat	4615	eD72	0.7	0.6	0.3	0.53	16.1	16	0.2	10.77
eD73	eD73	Retli_jun13 (5963 sequences-1861603 residues)	3 Dec 2014 at 23:57:47 GMT	elongation factor Tu [Rhizobium etli CFN 42]	gi|86357289	86	1.5e-05	42782	5.29	40	10	0.28	http://132.248.34.208/mascot/cgi/master_results.pl?file=../data/20141203/F032762.dat	4605	eD73	5.5	10	11.2	8.9	11.6	98.7	2	37.43
eD74 mix1	eD74	Retli_jun13 (5963 sequences-1861603 residues)	3 Dec 2014 at 20:38:03 GMT	cysteine synthase A [Rhizobium etli CFN 42]	gi|86357405	136	1.5e-10	36599	5.28	20	7	0.25	http://132.248.34.208/mascot/cgi/master_results.pl?file=../data/20170324/F044291.dat	4404	eD74		1.7	1.2	1.45	5.1	5.7	4	4.93
eD74 mix2	eD74	Retli_jun13 (5963 sequences-1861603 residues)	3 Dec 2014 at 20:38:03 GMT	oxidoreductase [Rhizobium etli CFN 42]	gi|86356464	136	1.5e-10	38299	5.34	20	5	0.18	http://132.248.34.208/mascot/cgi/master_results.pl?file=../data/20170324/F044291.dat	4404	eD74		1.7	1.2	1.45	5.1	5.7	4	4.93
eD75	eD75	Retli_jun13 (5963 sequences-1861603 residues)	2 Dec 2014 at 20:53:26 GMT	tRNA delta(2)-isopentenylpyrophosphate transferase [Rhizobium etli CFN 42]	gi|86358397	60	0.0067	32254	5.93	14	6	0.32	http://132.248.34.208/mascot/cgi/master_results.pl?file=../data/20141202/F032379.dat	4421	eD75				0	3	2.6	5.5	3.7
eD77	eD77	Retli_jun13 (5963 sequences-1861603 residues)	2 Dec 2014 at 21:04:22 GMT	N6-hydroxylysine O-acetyltransferase [Rhizobium etli CFN 42]	gi|86361189	76	0.00016	37798	6.41	27	8	0.26	http://132.248.34.208/mascot/cgi/master_results.pl?file=../data/20141202/F032392.dat	5416	eD77				0	15.3	10.1	0	8.47
D8	eD8	Retli_jun13 (5963 sequences-1861603 residues)	10 Mar 2016 at 18:42:06 GMT	peptidyl prolyl cis-trans isomerase B signal peptide protein [Rhizobium etli CFN 42]	gi|86357734	87	1.3e-05	18636	5.63	11	6	0.39	http://132.248.34.208/mascot/cgi/master_results.pl?file=../data/20160310/F042613.dat	3204	eD8	8.4	14.1	6.3	9.6	172.9	180.9	169.3	174.37
eD87	eD87	Retli_jun13 (5963 sequences-1861603 residues)	4 Dec 2014 at 00:11:03 GMT	flagellin C protein [Rhizobium etli CFN 42]	gi|86356320	65	0.002	31060	4.62	35	13	0.47	http://132.248.34.208/mascot/cgi/master_results.pl?file=../data/20141203/F032776.dat	7316	eD87	2.6	18.4	0	7	6.4	51.2	8.9	22.17
eD88mix1	eD88	Retli_jun13 (5963 sequences-1861603 residues)	30 Oct 2014 at 02:49:15 GMT	flagellin C protein [Rhizobium etli CFN 42]	gi|86356320▀	135	1.9e-10	31060	4.62	21	5	0.23	http://132.248.34.208/mascot/cgi/master_results.pl?file=../data/20141029/F030951.dat	7317	eD88	1720.6	424.5	521.5	888.87	305.3	141	2603	1016.43
eD88mix2	eD88	Retli_jun13 (5963 sequences-1861603 residues)	30 Oct 2014 at 02:49:15 GMT	nitrate/sulfonate/bicarbonate ABC transporter, substrate-binding protein [Rhizobium etli CFN 42]	gi|86359447	135	1.9e-10	35879	4.93	21	6	0.22	http://132.248.34.208/mascot/cgi/master_results.pl?file=../data/20141029/F030951.dat	7317	eD88	1720.6	424.5	521.5	888.87	305.3	141	2603	1016.43
eD89	eD89	Retli_jun13 (5963 sequences-1861603 residues)	28 Nov 2014 at 03:05:02 GMT	flagellin C protein [Rhizobium etli CFN 42]	gi|86356320	61	0.0046	31060	4.62	22	7	0.28	http://132.248.34.208/mascot/cgi/master_results.pl?file=../data/20141127/F032020.dat	7425	eD89	5264.7	8619.2	4419.2	6101.03	23673.8	20039.3		21856.5
D91	eD91	Retli_jun13 (5963 sequences-1861603 residues)	11 Mar 2016 at 00:47:57 GMT	flagellin C protein [Rhizobium etli CFN 42]	gi|86356320	87	1.3e-05	31060	4.62	14	8	0.33	http://132.248.34.208/mascot/cgi/master_results.pl?file=../data/20160310/F042671.dat	7420	eD91	7.2		15.6	11.4	41.6	20.7	0.2	20.83
D92	eD92	Retli_jun13 (5963 sequences-1861603 residues)	11 Mar 2016 at 00:57:38 GMT	xylose ABC transporter- substrate-binding protein [Rhizobium etli CFN 42]	gi|86358766	71	0.00051	37677	4.77	12	6	0.25	http://132.248.34.208/mascot/cgi/master_results.pl?file=../data/20160310/F042675.dat	7423	eD92	3925.4	6363.7	3098.7	4462.6	10272.1	7612.6	11874.8	9919.83
D93	eD93	Retli_jun13 (5963 sequences-1861603 residues)	6 Mar 2015 at 01:41:16 GMT	xylose ABC transporter- substrate-binding protein [Rhizobium etli CFN 42]	gi|86358766	58	0.0095	37677	4.77	22	6	0.18	http://132.248.34.208/mascot/cgi/master_results.pl?file=../data/20150305/F034482.dat	8421	eD93	269.4	949.5	1112.9	777.27	429.6		521.3	475.45
D94	eD94	Retli_jun13 (5963 sequences-1861603 residues)	11 Mar 2016 at 01:15:59 GMT	flagellin C protein [Rhizobium etli CFN 42]	gi|86356320	61	0.0043	31060	4.62	13	5	0.17	http://132.248.34.208/mascot/cgi/master_results.pl?file=../data/20160310/F042686.dat	7413	eD94	2693.6	4048.5	1322.7	2688.27	3819.9	5321.6	4830.4	4657.3
D95	eD95	Retli_jun13 (5963 sequences-1861603 residues)	11 Mar 2016 at 01:28:31 GMT	flagellin C protein [Rhizobium etli CFN 42]	gi|86356320	64	0.0026	31060	4.62	12	5	0.17	http://132.248.34.208/mascot/cgi/master_results.pl?file=../data/20160310/F042690.dat	7417	eD95	82.2	61.4	11.7	51.77	39.6		26	32.8
D96	eD96	Retli_jun13 (5963 sequences-1861603 residues)	6 Mar 2015 at 23:49:28 GMT	flagellin C protein [Rhizobium etli CFN 42]	gi|86356321	62	0.0034	31081	4.5	23	7	0.34	http://132.248.34.208/mascot/cgi/master_results.pl?file=../data/20150306/F034550.dat	8426	eD96	2128.9	3704.3	1807.6	2546.93	18431.9	13257.4	9667.2	13785.5
eD97	eD97	Retli_jun13 (5963 sequences-1861603 residues)	4 Dec 2014 at 00:14:54 GMT	flagellin C protein [Rhizobium etli CFN 42]	gi|86356321	69	0.00082	31081	4.5	37	7	0.32	http://132.248.34.208/mascot/cgi/master_results.pl?file=../data/20141203/F032779.dat	8314	eD97				0	841.1	1171.8	2785.4	1599.43
eD98	eD98	Retli_jun13 (5963 sequences-1861603 residues)	4 Dec 2014 at 00:29:27 GMT	flagellin C protein [Rhizobium etli CFN 42]	gi|86356321	59	0.0084	31081	4.5	23	9	0.36	http://132.248.34.208/mascot/cgi/master_results.pl?file=../data/20141203/F032791.dat	8407	eD98	852.8	155.8	339.2	449.27	1329.6	105.8	2953.8	1463.07
D99	eD99	Retli_jun13 (5963 sequences-1861603 residues)	6 Mar 2015 at 23:30:42 GMT	ABC transporter substrate-binding protein [Rhizobium etli CFN 42]	gi|86358493	96	1.5e-06	38964	4.97	28	10	0.37	http://132.248.34.208/mascot/cgi/master_results.pl?file=../data/20150306/F034535.dat	8424	eD99	164.2	991.8	104.7	420.23	2279.8	2346.9	2000.7	2209.13
eD99	eD99	Retli_jun13 (5963 sequences-1861603 residues)	4 Dec 2014 at 00:45:12 GMT	flagellin C protein [Rhizobium etli CFN 42]	gi|86356322	81	4.3e-05	31535	4.45	38	8	0.32	http://132.248.34.208/mascot/cgi/master_results.pl?file=../data/20141203/F032801.dat	8424	eD99	164.2	991.8	104.7	420.23	2279.8	2346.9	2000.7	2209.13
