# Supplementary material for: Impact of c-di-GMP on the Extracellular Proteome of Rhizobium etli
Source: Biology (Basel). 2022 Dec 26;12(1):44. doi: 10.3390/biology12010044 (PMC9855851; doi:10.3390/biology12010044)
Supplement: Supplementary file 1 [file biology-12-00044-s001.zip › TableS2-Extracellular-iTRAQ.xlsx]

## Sheet: ident_peptides
scan_id	rt	mz	charge	isotopic_peak	mass_error	missed_cleavages	specific_termini	flank_left	peptide	flank_right	mods	is_decoy	proteinGroup	inferredIDs	inferredCoords	FDR_spectrum	FDR_peptide	FDR_protein	IDs	score_M1	score_M2	score_O1	score_O2	score_T1	score_T2	score_Y1	score_Y2
35669@20170914_03_MJLorite_iTRAQ.cmpd.rclb.mgf	117.18	687.848	4	0	0.0093	0	2	PVEK	ETLDQVPEQYRPADGMWTGIAAR	TTVF	MOD:01485 E1	0	2055	Q2K2Y6	Q2K2Y6{110-132}	0	0.0001	0.0002	Q2K2Y6	66.06						106.321
53408@20170914_03_MJLorite_iTRAQ.cmpd.rclb.mgf	170.95	732.893	4	0	0.0123	0	2	IRAK	QYQAVTVAEPLNLQGWQLVDELNR	AFAG	MOD:01485 Q1	0	4359	Q2K1J3	Q2K1J3{294-317}	0	0.0001	0.0002	Q2K1J3	60.68						83.6816
45212@20170914_03_MJLorite_iTRAQ.cmpd.rclb.mgf	145.2	733.382	4	0	0.0048	0	2	GAGR	VANADPDGYTVLLHHIGMATSATLYR	KLAY	MOD:01485 V1	0	8013	Q2K4P7	Q2K4P7{81-106}	0	0.0001	0.0002	Q2K4P7	116.72						106.508
39280@20170914_03_MJLorite_iTRAQ.cmpd.rclb.mgf	127.77	689.886	4	0	0.0044	0	2	SSLK	GVGYGTAAQPLPIVTGQDAEIPSVK	SIIA	MOD:01485 G1;MOD:01485 K25	0	5613	Q2K5F5	Q2K5F5{249-273}	0	0.0001	0.0002	Q2K5F5	99.43						88.1695
25018@20170914_03_MJLorite_iTRAQ.cmpd.rclb.mgf	85.93	640.684	3	0	0.0045	0	2		TSINTNSSAQAALQTLR	NVNQ	MOD:01485 T1	0	5239	Q2KCF1	Q2KCF1{2-18}	0	0.0001	0.0002	Q2KCF1	90.43						109.115
25479@20170914_03_MJLorite_iTRAQ.cmpd.rclb.mgf	87.3	416.231	4	0	-0.0006	0	2	GIEK	AGSAEDAEAVAAALK	GGME	MOD:01485 A1;MOD:01485 K15	0	5167	Q2K5M7	Q2K5M7{314-328}	0	0.0001	0.0002	Q2K5M7	74.55						52.1577
27719@20170914_03_MJLorite_iTRAQ.cmpd.rclb.mgf	93.87	644.001	3	0	0.0058	0	2	RVGK	AADNAAYWSIATTMR	SDNK	MOD:01485 A1;MOD:01485 Y7	0	5239	Q2KCF0	Q2KCF0{40-54}	0	0.0001	0.0002	Q2KCF0	59.14						100.856
54860@20170914_03_MJLorite_iTRAQ.cmpd.rclb.mgf	175.22	913.117	3	0	-0.0009	0	2	FHVK	ADGSFTYDLTADLDAGVTYTEVLR	YYKI	MOD:01485 A1	0	201	Q2K1Q3	Q2K1Q3{184-207}	0	0.0001	0.0002	Q2K1Q3	95.43						139.879
36214@20170914_03_MJLorite_iTRAQ.cmpd.rclb.mgf	118.78	957.17	3	0	0.0186	0	2	VAQK	MSEDLGQQVIVQNVAGAGGNLGAGNVAR	AEPD	MOD:01485 M1	0	3525	Q2K4H2	Q2K4H2{61-88}	0	0.0001	0.0002	Q2K4H2	92.52						150.449
28937@20170914_03_MJLorite_iTRAQ.cmpd.rclb.mgf	97.45	559.302	4	0	0.007	1	2	CCAK	MGDVADDKEVLGAGVSGGLR	KEDT	MOD:01485 M1;MOD:01485 K8	0	876	Q2K1K6	Q2K1K6{199-218}	0	0.0001	0.0002	Q2K1K6	59.8						74.952
56073@20170914_03_MJLorite_iTRAQ.cmpd.rclb.mgf	179.03	568.496	5	0	0.0031	0	2	EKFK	AAGFNPEAYTLYSYAAMQAIAGAAK	AAGS	MOD:01485 A1;MOD:01485 K25	0	3055	Q2K502	Q2K502{289-313}	0	0.0001	0.0002	Q2K502	58.6						70.7809
50901@20170914_03_MJLorite_iTRAQ.cmpd.rclb.mgf	161.88	743.573	5	0	0.0041	0	2	NIVK	QLQAAGYGTDLQYGDDDIPNQLSQIENMVTK	GVKV	MOD:01485 Q1;MOD:01485 K31	0	5613	Q2K5F5	Q2K5F5{52-82}	0	0.0001	0.0002	Q2K5F5	82.46						94.0557
64429@20170914_03_MJLorite_iTRAQ.cmpd.rclb.mgf	205.18	882.952	4	0	0.0071	0	2	DTDR	VLGGHIVGFGAGEMIHEIAVLMEFGGSSEDLGR	SCHA	MOD:01485 V1	0	5902	Q2K3F8	Q2K3F8{410-442}	0	0.0001	0.0002	Q2K3F8	63.31						98.9752
49847@20170914_03_MJLorite_iTRAQ.cmpd.rclb.mgf	158.78	701.396	4	0	-0.0044	1	2	LIAK	MKEAGVSIIYWGGLHTEAGLIIR	QAAD	MOD:01485 M1;MOD:01485 K2	0	3055	Q2K502	Q2K502{211-233}	0	0.0001	0.0002	Q2K502	68.46						77.589
44596@20170914_03_MJLorite_iTRAQ.cmpd.rclb.mgf	143.42	461.521	4	0	0.0066	0	2	EAFK	YLVDYDAIGATLIK	GIGE	MOD:01485 Y1;MOD:01485 K14	0	3376	Q2K350	Q2K350{326-339}	0	0.0001	0.0002	Q2K350	59.79						56.6497
59664@20170914_03_MJLorite_iTRAQ.cmpd.rclb.mgf	190.02	702.599	4	0	0.0098	0	2	LAAR	TFNAGFNTVEFTSSALVDMAFHTR	EAVE	MOD:01485 T1	0	7004	Q2K3C4	Q2K3C4{549-572}	0	0.0001	0.0002	Q2K3C4	91.84						94.5043
43398@20170914_03_MJLorite_iTRAQ.cmpd.rclb.mgf	139.9	551.822	4	0	0.0037	1	2	GCVR	LLNQDIIDLYDRVPTK	APIV	MOD:01485 L1;MOD:01485 K16	0	5887	Q2KB13	Q2KB13{222-237}	0	0.0001	0.0002	Q2KB13	70.76						62.4957
56710@20170914_03_MJLorite_iTRAQ.cmpd.rclb.mgf	181.32	695.143	4	0	0.0054	0	2	KSVK	EGVIGATSQQYPLLMASLGIEAIK	KFAD	MOD:01485 E1;MOD:01485 K24	0	5517	Q2KD00	Q2KD00{269-292}	0	0.0001	0.0002	Q2KD00	99.38						124.743
26014@20170914_03_MJLorite_iTRAQ.cmpd.rclb.mgf	88.87	815.388	3	0	0.0104	0	2	QVER	FAGGQYEIESDQLTEEQEAR	HVA	MOD:01485 F1	0	3309	Q2K2R0	Q2K2R0{303-322}	0	0.0001	0.0002	Q2K2R0	107.36						123.282
56353@20170914_03_MJLorite_iTRAQ.cmpd.rclb.mgf	180.27	757.629	4	0	0.004	0	2	ALEK	AGWSVNDLDLVEANEAFAAQACAVTK	DLGW	MOD:00110 C22;MOD:01485 A1;MOD:01485 K26	0	8991	Q2K324	Q2K324{304-329}	0	0.0001	0.0002	Q2K324	76.24						108.517
17943@20170914_03_MJLorite_iTRAQ.cmpd.rclb.mgf	65.17	743.904	4	0	0.0059	1	2	SAPK	ADAAPAKAEAAPAAAPAPTAAPAAVSAGGNR	TFSS	MOD:01485 A1;MOD:01485 K7	0	4223	Q2K8W5	Q2K8W5{107-137}	0	0.0001	0.0002	Q2K8W5	61.89						72.6326
20955@20170914_03_MJLorite_iTRAQ.cmpd.rclb.mgf	74.02	479.018	4	0	0.0041	0	2	GKRK	ALYEPVHGSAPDIAGK	GIAN	MOD:01485 A1;MOD:01485 K16	0	2899	Q2K2V0	Q2K2V0{283-298}	0	0.0001	0.0002	Q2K2V0	61.94						65.3554
27812@20170914_03_MJLorite_iTRAQ.cmpd.rclb.mgf	94.13	664.333	3	0	0.0143	0	2	NQVK	LVTMPSSSSEQFSQYR	LWLA	MOD:01485 L1	0	2994	Q2JZ85	Q2JZ85{57-72}	0	0.0001	0.0002	Q2JZ85	65.55						83.282
39111@20170914_03_MJLorite_iTRAQ.cmpd.rclb.mgf	127.25	689.886	4	0	0.0044	0	2	SSLK	GVGYGTAAQPLPIVTGQDAEIPSVK	SIIA	MOD:01485 G1;MOD:01485 K25	0	5613	Q2K5F5	Q2K5F5{249-273}	0	0.0001	0.0002	Q2K5F5	93.91						92.0069
58380@20170914_03_MJLorite_iTRAQ.cmpd.rclb.mgf	186.22	1009.78	4	1	0.0251	0	2	AINR	EVIGPQILGTGELPAYSWVPPGTANYGEPAYVSWK	DLPY	MOD:01485 E1;MOD:01485 K35	0	2364	Q2K5M4	Q2K5M4{311-345}	0	0.0001	0.0002	Q2K5M4	62.75						86.451
25387@20170914_03_MJLorite_iTRAQ.cmpd.rclb.mgf	87.03	420.244	4	0	-0.0018	0	2	YRAR	AAALSMIPTSTGAAK	AVGL	MOD:01485 A1;MOD:01485 K15	0	9080	Q2K4I4	Q2K4I4{202-216}	0	0.0001	0.0002	Q2K4I4	81.35						56.9056
64627@20170914_03_MJLorite_iTRAQ.cmpd.rclb.mgf	206.38	625.596	4	0	0.0003	0	2	GGDR	VTGDHMGMLGTIINALALATSLR	KLNI	MOD:01485 V1	0	9737	Q2K8Y5	Q2K8Y5{72-94}	0	0.0001	0.0002	Q2K8Y5	86.83						69.0267
26565@20170914_03_MJLorite_iTRAQ.cmpd.rclb.mgf	90.48	516.284	4	0	0.0005	0	2	ILAK	GNVIQGTDQLLSADSQK	QKED	MOD:01485 G1;MOD:01485 K17	0	2233	Q2K7E8	Q2K7E8{362-378}	0	0.0001	0.0002	Q2K7E8	64.8						51.6518
38872@20170914_03_MJLorite_iTRAQ.cmpd.rclb.mgf	126.57	673.349	4	0	0.0068	0	2	SVGK	VAFVVSTEGGMDIEAVAHDTPEK	IQTI	MOD:01485 V1;MOD:01485 K23	0	1104	Q2K3F0	Q2K3F0{131-153}	0	0.0001	0.0002	Q2K3F0	68.16						71.7176
31957@20170914_03_MJLorite_iTRAQ.cmpd.rclb.mgf	106.3	405.243	4	0	0.0008	0	2	SDNK	ALSAVSDALGVGAAK	VDTA	MOD:01485 A1;MOD:01485 K15	0	5239	Q2KCF1	Q2KCF1{59-73}	0	0.0001	0.0002	Q2KCF1	71.69						58.9574
59659@20170914_03_MJLorite_iTRAQ.cmpd.rclb.mgf	190.02	605.564	4	0	0.0001	0	2	NAAK	LWMEYLYSDEGQLGWLK	GYCH	MOD:01485 L1;MOD:01485 K17	0	2394	Q2K678	Q2K678{289-305}	0	0.0001	0.0002	Q2K678	62.15						89.0909
25277@20170914_03_MJLorite_iTRAQ.cmpd.rclb.mgf	86.72	560.316	4	0	0.0041	0	2	GQMK	ALQVGHEIAAQQVAQMQK	LRGL	MOD:01485 A1;MOD:01485 K18	0	478	Q2K2Q6	Q2K2Q6{199-216}	0	0.0001	0.0002	Q2K2Q6	69.9						67.7033
22214@20170914_03_MJLorite_iTRAQ.cmpd.rclb.mgf	77.72	523.044	4	0	0.005	0	2	EGEK	ITSVNNQEVSTPADVVK	VLNQ	MOD:01485 I1;MOD:01485 K17	0	5777	Q2KAN8	Q2KAN8{479-495}	0	0.0001	0.0002	Q2KAN8	63.33						70.6171
40382@20170914_03_MJLorite_iTRAQ.cmpd.rclb.mgf	131.03	656.862	4	0	-0.0011	0	2	ADKK	VVVGYQTDALPSSVAIANGEFAK	KTGY	MOD:01485 V1;MOD:01485 K23	0	4710	Q2K163	Q2K163{30-52}	0	0.0001	0.0002	Q2K163	98.68						72.4485
59705@20170914_03_MJLorite_iTRAQ.cmpd.rclb.mgf	190.13	813.185	4	0	-0.0022	0	2	TTPK	YQELSTALQQAIQESLLGQSTPEDALK	SAAE	MOD:01485 Y1;MOD:01485 K27	0	9432	Q2K4U9	Q2K4U9{378-404}	0	0.0001	0.0002	Q2K4U9	66.68						110.431
53285@20170914_03_MJLorite_iTRAQ.cmpd.rclb.mgf	170.58	702.141	4	0	0.0044	0	2	KTFR	SGAQATFIVFQTPEEGIGIPVDLK	GFAE	MOD:01485 S1;MOD:01485 K24	0	2314	Q2KBM4	Q2KBM4{231-254}	0	0.0001	0.0002	Q2KBM4	62.25						89.7718
64667@20170914_03_MJLorite_iTRAQ.cmpd.rclb.mgf	206.72	913.115	3	0	-0.0079	0	2	FHVK	ADGSFTYDLTADLDAGVTYTEVLR	YYKI	MOD:01485 A1	0	201	Q2K1Q3	Q2K1Q3{184-207}	0	0.0001	0.0002	Q2K1Q3	60.05						96.4319
64815@20170914_03_MJLorite_iTRAQ.cmpd.rclb.mgf	210.82	831.428	3	0	0.0114	0	2	DESK	TNYGYTVGAGVEAFVTNNITTR	LEYR	MOD:01485 T1	0	5698	Q2KA52	Q2KA52{153-174}	0	0.0001	0.0002	Q2KA52	85.26						107.742
36682@20170914_03_MJLorite_iTRAQ.cmpd.rclb.mgf	120.17	669.699	3	1	0.0044	0	2	AIPR	GGVLEVTLENPEFDAK	FTLT	MOD:01485 G1;MOD:01485 K16	0	9719	Q2K4Y7	Q2K4Y7{133-148}	0	0.0001	0.0002	Q2K4Y7	60.96						102.083
21972@20170914_03_MJLorite_iTRAQ.cmpd.rclb.mgf	77.02	473.012	4	0	-0.0061	0	2	APAR	QIAENAGDEASIVVGK	ILDK	MOD:01485 Q1;MOD:01485 K16	0	6161	Q2KBZ7	Q2KBZ7{452-467}	0	0.0001	0.0002	Q2KBZ7	78.74						62.4945
40923@20170914_03_MJLorite_iTRAQ.cmpd.rclb.mgf	132.62	654.866	4	0	-0.0083	0	2	SAGR	TAVGSFNGAFATVPAHELGAAVIK	GALA	MOD:01485 T1;MOD:01485 K24	0	8991	Q2K324	Q2K324{14-37}	0	0.0001	0.0002	Q2K324	99.4						110.122
50955@20170914_03_MJLorite_iTRAQ.cmpd.rclb.mgf	162.05	665.125	4	0	0.0118	0	2	AGER	ILDVISAAGGLTTNNIETNVTLQR	RGRT	MOD:01485 I1	0	180	Q2K587	Q2K587{205-228}	0	0.0001	0.0002	Q2K587	87.17						76.9017
63884@20170914_03_MJLorite_iTRAQ.cmpd.rclb.mgf	203.47	657.011	3	0	0.0105	0	2	IAGK	GIANPIAMIASFAMCLR	YSFN	MOD:00110 C15;MOD:01485 G1	0	2899	Q2K2V0	Q2K2V0{299-315}	0	0.0001	0.0002	Q2K2V0	73.97						108.441
31740@20170914_03_MJLorite_iTRAQ.cmpd.rclb.mgf	105.67	879.74	3	0	0.0052	0	2	GYIR	FQVDVGDQPLNGSASNDSDWDAR	TRGQ	MOD:01485 F1	0	6045	Q2K7H2;Q2KAI4	Q2K7H2{65-87};Q2KAI4{65-87}	0	0.0001	0.0002	Q2K7H2;Q2KAI4	122.57						154.965
45769@20170914_03_MJLorite_iTRAQ.cmpd.rclb.mgf	146.85	559.065	4	0	0.0004	0	2	PILK	QGNVPMVIMNAATSAIVTK	SPLV	MOD:01485 Q1;MOD:01485 K19	0	2946	Q2K4N4	Q2K4N4{111-129}	0	0.0001	0.0002	Q2K4N4	66.3						70.194
52464@20170914_03_MJLorite_iTRAQ.cmpd.rclb.mgf	167.7	689.361	2	0	-0.0025	0	2	PGAR	QAFLLASVENFR	VAEI	MOD:00040 Q1	0	2718	Q2K547	Q2K547{97-108}	0	0.0001	0.0002	Q2K547	58.8						96.8072
45205@20170914_03_MJLorite_iTRAQ.cmpd.rclb.mgf	145.18	645.369	3	0	0.0013	0	2		TSILTNVAAMAALQTLR	GIND	MOD:01485 T1;MOD:00719 M10	0	5239	Q2KCE9	Q2KCE9{2-18}	0	0.0001	0.0002	Q2KCE9	73.58						106.603
36486@20170914_03_MJLorite_iTRAQ.cmpd.rclb.mgf	119.58	957.168	3	0	0.0127	0	2	VAQK	MSEDLGQQVIVQNVAGAGGNLGAGNVAR	AEPD	MOD:01485 M1	0	3525	Q2K4H2	Q2K4H2{61-88}	0	0.0001	0.0002	Q2K4H2	106.28						158.32
43772@20170914_03_MJLorite_iTRAQ.cmpd.rclb.mgf	140.98	751.408	3	0	-0.0005	0	2		AESYDVIIIGSGPGGYVAAIR	ASQL	MOD:01485 A1	0	7963	O05940	O05940{2-22}	0	0.0001	0.0002	O05940	91.29						114.094
46179@20170914_03_MJLorite_iTRAQ.cmpd.rclb.mgf	148.03	837.209	4	0	0.0063	0	2	EAVR	AAITDATAAILIEPVQGEGGVRPATTEFMK	ALRR	MOD:01485 A1;MOD:01485 K30	0	7757	Q2KCV1	Q2KCV1{171-200}	0	0.0001	0.0002	Q2KCV1	70.65						120.068
39753@20170914_03_MJLorite_iTRAQ.cmpd.rclb.mgf	129.18	689.885	4	0	0.0024	0	2	SSLK	GVGYGTAAQPLPIVTGQDAEIPSVK	SIIA	MOD:01485 G1;MOD:01485 K25	0	5613	Q2K5F5	Q2K5F5{249-273}	0	0.0001	0.0002	Q2K5F5	77.47						96.0457
52357@20170914_03_MJLorite_iTRAQ.cmpd.rclb.mgf	167	736.15	4	0	-0.0008	0	2	DVLK	DVPTAVEAGLPGFEVGIWHGIYTPK	GTPA	MOD:01485 D1;MOD:01485 K25	0	8013	Q2K4P7	Q2K4P7{235-259}	0	0.0001	0.0002	Q2K4P7	72.1						122.52
46981@20170914_03_MJLorite_iTRAQ.cmpd.rclb.mgf	150.38	751.362	4	0	-0.0009	0	2	VPYK	GTGPAMTDLLGGQVDIMCDQTTNTTK	QIKG	MOD:00110 C18;MOD:01485 G1;MOD:01485 K26	0	8013	Q2K4P7	Q2K4P7{187-212}	0	0.0001	0.0002	Q2K4P7	92.34						95.9864
17938@20170914_03_MJLorite_iTRAQ.cmpd.rclb.mgf	65.15	581.295	4	0	0.0048	0	2	LVVR	LTNDSPNNSDPAIAEGYQK	LFVD	MOD:01485 L1;MOD:01485 K19	0	6895	Q2JY83	Q2JY83{45-63}	0	0.0001	0.0002	Q2JY83	64.82						70.4474
48229@20170914_03_MJLorite_iTRAQ.cmpd.rclb.mgf	154.03	588.308	4	0	0.0027	0	2	ISTR	IELQENFVGALSDSIDSGVGR	LVDA	MOD:01485 I1	0	5239	Q2KCE9	Q2KCE9{240-260}	0	0.0001	0.0002	Q2KCE9	82.51						75.7572
31684@20170914_03_MJLorite_iTRAQ.cmpd.rclb.mgf	105.5	779.077	3	0	0.0105	0	2	KKHK	AVAEIPEGAVIGVPNDPSNEGR	ALRV	MOD:01485 A1	0	5940	Q2K283	Q2K283{133-154}	0	0.0001	0.0002	Q2K283	85.25						120.621
43235@20170914_03_MJLorite_iTRAQ.cmpd.rclb.mgf	139.42	790.373	4	0	-0.0036	0	2	IQQR	TAAYDPGNEYAVDYMWGTDGIGYNVK	KVAE	MOD:01485 T1;MOD:01485 K26	0	189	Q2KCA6	Q2KCA6{117-142}	0	0.0001	0.0002	Q2KCA6	110.13						86.9785
59194@20170914_03_MJLorite_iTRAQ.cmpd.rclb.mgf	188.62	600.329	4	0	0.0098	0	2	TYVR	EGIEIYGNLFDDLTQAALK	VDRP	MOD:01485 E1;MOD:01485 K19	0	3818	Q2K709	Q2K709{303-321}	0	0.0001	0.0002	Q2K709	79.1						79.1332
56965@20170914_03_MJLorite_iTRAQ.cmpd.rclb.mgf	182.05	855.455	5	1	0.0057	0	2	VDAK	YSSSENYEQQIVIDTQAGSPPNVAILPQPGLLADLAGK	GFLT	MOD:01485 Y1;MOD:01485 K38	0	4702	Q2KCC4	Q2KCC4{85-122}	0	0.0001	0.0002	Q2KCC4	70.89						102.781
19203@20170914_03_MJLorite_iTRAQ.cmpd.rclb.mgf	68.87	695.85	4	0	0.0044	0	2	KFNR	TLIDVNGHTDSTGSLQHNQDLSQR	RALS	MOD:01485 T1	0	998	Q2K6F8	Q2K6F8{143-166}	0	0.0001	0.0002	Q2K6F8	81.78						109.271
28757@20170914_03_MJLorite_iTRAQ.cmpd.rclb.mgf	96.92	565.772	4	0	0.0068	0	2	STLK	AASLTADQFDSEEGTMSSLR	SMSE	MOD:01485 A1	0	478	Q2K2Q6	Q2K2Q6{168-187}	0	0.0001	0.0002	Q2K2Q6	87.57						81.6814
46790@20170914_03_MJLorite_iTRAQ.cmpd.rclb.mgf	149.82	589.543	4	0	-0.0005	0	2	LSSR	IDSQEDFVSALSDSIDSGIGR	LVDA	MOD:01485 I1	0	5239	Q2KCF1	Q2KCF1{239-259}	0	0.0001	0.0002	Q2KCF1	75.31						76.7159
43423@20170914_03_MJLorite_iTRAQ.cmpd.rclb.mgf	139.97	900.486	4	0	0.0001	0	2	APIK	IGSYGTGAAPVIHSGGDGIHSLYASNIVIENLK	ISNT	MOD:01485 I1;MOD:01485 K33	0	1972	Q2K708	Q2K708{67-99}	0	0.0001	0.0002	Q2K708	85.58						112.231
28515@20170914_03_MJLorite_iTRAQ.cmpd.rclb.mgf	96.22	537.551	4	0	0.0042	1	2	FLPK	GQLGALDENPYKLDVAR	AKEL	MOD:01485 G1;MOD:01485 K12	0	3376	Q2K350	Q2K350{352-368}	0	0.0001	0.0002	Q2K350	58.82						77.5484
50075@20170914_03_MJLorite_iTRAQ.cmpd.rclb.mgf	159.45	1008.2	3	0	0.0134	0	2	ADGK	MAQLNQQPLGTGPFTFVAYQPDAVIR	YKAN	MOD:01485 M1;MOD:00719 M1	0	474	Q2KC86	Q2KC86{196-221}	0	0.0001	0.0002	Q2KC86	74.32						123.378
48936@20170914_03_MJLorite_iTRAQ.cmpd.rclb.mgf	156.12	572.301	4	0	-0.005	0	2	GAAK	VDTAYTAMDSAIDVVGEIK	AKLV	MOD:01485 V1;MOD:01485 K19	0	5239	Q2KCF1	Q2KCF1{74-92}	0	0.0001	0.0002	Q2KCF1	64.97						73.8526
61391@20170914_03_MJLorite_iTRAQ.cmpd.rclb.mgf	195.13	859.228	4	0	0.0087	1	2	ESSK	LSALQTQQQLAVQSLSIANSSSQTILSLFRG		MOD:01485 L1	0	5239	Q2KCF0	Q2KCF0{272-302}	0	0.0001	0.0002	Q2KCF0	104.73						110.678
41979@20170914_03_MJLorite_iTRAQ.cmpd.rclb.mgf	135.72	772.387	4	0	0.0096	0	2	GDTR	NYDIAGNYIHDGAWGVAVSAAGTTTYVR	EGIE	MOD:01485 N1	0	3818	Q2K709	Q2K709{275-302}	0	0.0001	0.0002	Q2K709	78.09						110.21
32372@20170914_03_MJLorite_iTRAQ.cmpd.rclb.mgf	107.52	751.368	4	0	0.0106	0	2	DAAK	AMVDQGVDVLTQHTDTTAPMQVAEER	GIHA	MOD:01485 A1;MOD:00719 M2	0	10500	Q2K8G8	Q2K8G8{204-229}	0	0.0001	0.0002	Q2K8G8	63.25						125.913
29736@20170914_03_MJLorite_iTRAQ.cmpd.rclb.mgf	99.78	1224.6	2	0	-0.0023	0	2	FLTK	QVDANNGAVTDVQGTYGTFHVK	ADGS	MOD:00040 Q1;MOD:01485 K22	0	201	Q2K1Q3	Q2K1Q3{162-183}	0	0.0001	0.0002	Q2K1Q3	76.28						129.764
46144@20170914_03_MJLorite_iTRAQ.cmpd.rclb.mgf	147.93	766.395	4	0	0.0182	0	2	VVTR	DVLLEEVWGYNSGVTTHTLETHVYR	LRQK	MOD:01485 D1	0	986	Q2K373	Q2K373{177-201}	0	0.0001	0.0002	Q2K373	83.39						89.8569
47762@20170914_03_MJLorite_iTRAQ.cmpd.rclb.mgf	152.67	796.156	4	0	0.0081	0	2	ELAK	WKPYLGDGFEAQTYSDSQNLFTLGR	AAIY	MOD:01485 W1;MOD:01485 Y4	0	8161	Q2K670	Q2K670{234-258}	0	0.0001	0.0002	Q2K670	68.11						77.4864
48661@20170914_03_MJLorite_iTRAQ.cmpd.rclb.mgf	155.28	770.397	4	0	0.0001	0	2	QEVK	IGYDGIVFATDSSNPDVAYVPADIYK	ALAA	MOD:01485 Y3;MOD:01485 K26	0	7138	Q2KCV8	Q2KCV8{109-134}	0	0.0001	0.0002	Q2KCV8	109.79						100.709
62992@20170914_03_MJLorite_iTRAQ.cmpd.rclb.mgf	200.15	843.198	4	0	0.0117	0	2	NIAR	QWYDTEQVDAIMELTTSSVALAVQAIAK	EKKK	MOD:01485 Q1;MOD:01485 K28	0	8393	Q2K0R6	Q2K0R6{89-116}	0	0.0001	0.0002	Q2K0R6	97.07						89.0608
38663@20170914_03_MJLorite_iTRAQ.cmpd.rclb.mgf	125.95	635.089	4	0	0.0016	0	2	GAVR	HPLSTQDFSSFLLQAQSSGAK	VIGL	MOD:01485 H1;MOD:01485 K21	0	8393	Q2K0R6	Q2K0R6{201-221}	0	0.0001	0.0002	Q2K0R6	64.09						61.156
36668@20170914_03_MJLorite_iTRAQ.cmpd.rclb.mgf	120.13	513.034	4	0	-0.0009	0	2	TVMR	SDSTNLGTIGDALGLGAAK	VDAT	MOD:01485 S1;MOD:01485 K19	0	9402	Q2KCE8	Q2KCE8{77-95}	0	0.0001	0.0002	Q2KCE8	59						66.4199
44010@20170914_03_MJLorite_iTRAQ.cmpd.rclb.mgf	141.68	719.616	4	0	0.0025	0	2	VAMK	AVNAGEVEGAVIYHYYWFGDQAK	TGEN	MOD:01485 A1;MOD:01485 K23	0	2055	Q2K2Y6	Q2K2Y6{212-234}	0	0.0001	0.0002	Q2K2Y6	106.68						99.1154
62093@20170914_03_MJLorite_iTRAQ.cmpd.rclb.mgf	197.28	934.223	4	0	0.0022	0	2	DGAK	GVQAMTDILAANPDLDAFGIMGGWPLFGAPQPYR	DLFK	MOD:01485 G1	0	321	Q2K5C9	Q2K5C9{212-245}	0	0.0001	0.0002	Q2K5C9	64.93						104.634
60621@20170914_03_MJLorite_iTRAQ.cmpd.rclb.mgf	192.83	693.537	6	0	0.0077	0	2	QGLK	ATLVSGDGIVSNELASIAGDAVAGTLNTFGPDPTLNPANK	ELVE	MOD:01485 A1;MOD:01485 K40	0	3055	Q2K502	Q2K502{242-281}	0	0.0001	0.0002	Q2K502	73.75						65.7678
55698@20170914_03_MJLorite_iTRAQ.cmpd.rclb.mgf	177.68	885.868	5	0	-0.0057	0	2	NPLR	SVANDAAYVSDVVGSIAGPVVLVGHSYGGQVISTAANGHGNVK	SLVY	MOD:01485 S1;MOD:01485 K43	0	1676	Q2K6P0	Q2K6P0{64-106}	0	0.0001	0.0002	Q2K6P0	72.32						114.426
45391@20170914_03_MJLorite_iTRAQ.cmpd.rclb.mgf	145.73	733.382	4	0	0.0045	0	2	GAGR	VANADPDGYTVLLHHIGMATSATLYR	KLAY	MOD:01485 V1	0	8013	Q2K4P7	Q2K4P7{81-106}	0	0.0001	0.0002	Q2K4P7	82.55						117.45
58447@20170914_03_MJLorite_iTRAQ.cmpd.rclb.mgf	186.43	679.885	4	0	0.0009	1	2	IQKK	FLANSPFVIIFQQTEVAGYRK	NLKD	MOD:01485 F1;MOD:01485 K21	0	3376	Q2K350	Q2K350{505-525}	0	0.0001	0.0002	Q2K350	65.81						74.6535
29571@20170914_03_MJLorite_iTRAQ.cmpd.rclb.mgf	99.32	579.809	4	0	-0.002	1	2	LLGR	LGVTVDFVDPSDHDEVRK	ALPG	MOD:01485 L1;MOD:01485 K18	0	7001	Q2JYI5	Q2JYI5{131-148}	0	0.0001	0.0002	Q2JYI5	60.7						64.4724
43763@20170914_03_MJLorite_iTRAQ.cmpd.rclb.mgf	140.97	650.831	4	0	-0.0011	0	2	IADK	YGDGQATTGLNMMTDLITANPK	LVGV	MOD:01485 Y1;MOD:01485 K22	0	8759	Q2KCX3	Q2KCX3{202-223}	0	0.0001	0.0002	Q2KCX3	66.24						88.1095
36384@20170914_03_MJLorite_iTRAQ.cmpd.rclb.mgf	119.28	722.613	4	0	0.0095	0	2	FTAK	SAAELNFVEPDETGTSFEENATIK	AVAS	MOD:01485 S1;MOD:01485 K24	0	644	Q2KDA3	Q2KDA3{35-58}	0	0.0001	0.0002	Q2KDA3	61.02						80.699
32653@20170914_03_MJLorite_iTRAQ.cmpd.rclb.mgf	108.35	481.021	4	0	0.0041	0	2	PQAK	TDTEAALNAATTVLNK	HADV	MOD:01485 T1;MOD:01485 K16	0	4310	Q2K3Y6	Q2K3Y6{200-215}	0	0.0001	0.0002	Q2K3Y6	78.08						69.6809
60429@20170914_03_MJLorite_iTRAQ.cmpd.rclb.mgf	192.27	906.216	4	0	-0.0006	0	2	RLIR	DSANVDYYATFDNFQVGVLQANSIVDGLGLK	DGKG	MOD:01485 D1;MOD:01485 K31	0	5613	Q2K5F5	Q2K5F5{120-150}	0	0.0001	0.0002	Q2K5F5	104.01						131.482
46217@20170914_03_MJLorite_iTRAQ.cmpd.rclb.mgf	148.15	549.557	4	0	0.0027	0	2	ADTK	IGTDLGLTNEWAYNIVK	NVGN	MOD:01485 I1;MOD:01485 K17	0	6573	Q2K902	Q2K902{291-307}	0	0.0001	0.0002	Q2K902	63.91						66.6526
6900@20170914_03_MJLorite_iTRAQ.cmpd.rclb.mgf	32.75	522.514	4	0	0.0044	0	2	KWQK	DTGETVTIQASHGGSGAQAR	SVID	MOD:01485 D1	0	5704	Q2K0P9	Q2K0P9{59-78}	0	0.0001	0.0002	Q2K0P9	72.86						90.705
50793@20170914_03_MJLorite_iTRAQ.cmpd.rclb.mgf	161.57	969.52	3	0	0.0106	0	2	EVQR	LQAAEPVALDQMVGMASTGYLPVEK	RAEV	MOD:01485 L1;MOD:01485 K25	0	5084	Q2K7U8	Q2K7U8{155-179}	0	0.0001	0.0002	Q2K7U8	58.67						124.081
45795@20170914_03_MJLorite_iTRAQ.cmpd.rclb.mgf	146.92	1133.92	3	0	-0.0022	0	2	FTTR	TTDSNQLLASGTYINTSPTLVEINMTSLVR	KTQS	MOD:01485 T1;MOD:00719 M25	0	2636	Q2K4C6	Q2K4C6{61-90}	0	0.0001	0.0002	Q2K4C6	97.86						131.401
52195@20170914_03_MJLorite_iTRAQ.cmpd.rclb.mgf	165.97	697.379	3	0	-0.0138	0	2	DYPK	LAQLWWQAIGDASSGAK	TAQE	MOD:01485 L1;MOD:01485 K17	0	10603	Q2K1V1	Q2K1V1{478-494}	0	0.0001	0.0002	Q2K1V1	66.87						117.118
56527@20170914_03_MJLorite_iTRAQ.cmpd.rclb.mgf	180.78	695.143	4	0	0.0053	0	2	KSVK	EGVIGATSQQYPLLMASLGIEAIK	KFAD	MOD:01485 E1;MOD:01485 K24	0	5517	Q2KD00	Q2KD00{269-292}	0	0.0001	0.0002	Q2KD00	108.19						125.117
57043@20170914_03_MJLorite_iTRAQ.cmpd.rclb.mgf	182.28	755.64	4	0	0.0098	0	2	KTSK	NHGAAYIASFPIPEVVMGINSFEQGAR	SVDP	MOD:01485 N1	0	10500	Q2K8G8	Q2K8G8{150-176}	0	0.0001	0.0002	Q2K8G8	101.16						74.3417
59823@20170914_03_MJLorite_iTRAQ.cmpd.rclb.mgf	190.48	873.784	3	0	-0.0021	0	2		AFELPELPYDYEALAPFMSK	ETLE	MOD:01485 A1;MOD:01485 K20	0	3834	Q2KAX8	Q2KAX8{2-21}	0	0.0001	0.0002	Q2KAX8	79.95						113.826
44688@20170914_03_MJLorite_iTRAQ.cmpd.rclb.mgf	143.68	531.054	4	0	-0.0057	0	2	KLAR	IDITSIEDNVTATSLIK	SGEF	MOD:01485 I1;MOD:01485 K17	0	10529	Q2K1V9	Q2K1V9{253-269}	0	0.0001	0.0002	Q2K1V9	59.12						70.8144
60422@20170914_03_MJLorite_iTRAQ.cmpd.rclb.mgf	192.25	842.709	4	0	0.0107	0	2	VAQK	AVAGILPSLPDIVGVVTQGGDGYGAAQAIAATDR	KMPI	MOD:01485 A1	0	353	Q2JYG5	Q2JYG5{205-238}	0	0.0001	0.0002	Q2JYG5	73.87						108.935
42827@20170914_03_MJLorite_iTRAQ.cmpd.rclb.mgf	138.22	555.29	4	0	0.0018	0	2	TNFK	LTYLTGGDDVFGPDFGGAK	VYTN	MOD:01485 L1;MOD:01485 K19	0	9188	Q2K5N5	Q2K5N5{215-233}	0	0.0001	0.0002	Q2K5N5	78.05						73.0105
51390@20170914_03_MJLorite_iTRAQ.cmpd.rclb.mgf	163.38	929.215	4	0	0.006	0	2	NIVK	QLQAAGYGTDLQYGDDDIPNQLSQIENMVTK	GVKV	MOD:01485 Q1;MOD:01485 K31	0	5613	Q2K5F5	Q2K5F5{52-82}	0	0.0001	0.0002	Q2K5F5	124.99						123.266
49928@20170914_03_MJLorite_iTRAQ.cmpd.rclb.mgf	159.03	586.803	4	0	-0.003	0	2	GAAK	VDTAYTAMDSAIDVVDEIK	AKLV	MOD:01485 V1;MOD:01485 K19	0	5239	Q2K133	Q2K133{74-92}	0	0.0001	0.0002	Q2K133	60.44						73.9358
48011@20170914_03_MJLorite_iTRAQ.cmpd.rclb.mgf	153.38	985.504	3	0	0.001	0	2	ETVR	LGGDVVVGAEVPADVTFQTIPDYEYR	YTRI	MOD:01485 L1	0	3301	Q2K5V7	Q2K5V7{157-182}	0	0.0001	0.0002	Q2K5V7	66.56						131.475
41776@20170914_03_MJLorite_iTRAQ.cmpd.rclb.mgf	135.13	508.017	4	0	0.0023	0	2	AMLK	NLTFSLDMENQIMGK	ILDD	MOD:01485 N1;MOD:01485 K15	0	9188	Q2K5N5	Q2K5N5{255-269}	0	0.0001	0.0002	Q2K5N5	70.99						60.0203
58663@20170914_03_MJLorite_iTRAQ.cmpd.rclb.mgf	187.07	753.393	4	0	0.001	0	2	ALYK	LFTQLFGSTAVQIPEPTSPYAWEQR	ATLN	MOD:01485 L1	0	2718	Q2K547	Q2K547{59-83}	0	0.0001	0.0002	Q2K547	67.42						79.3875
56379@20170914_03_MJLorite_iTRAQ.cmpd.rclb.mgf	180.33	710.368	4	0	0.0032	0	2	EKFK	AAGFNPEAYTLYSYAAMQAIAGAAK	AAGS	MOD:01485 A1;MOD:01485 K25	0	3055	Q2K502	Q2K502{289-313}	0	0.0001	0.0002	Q2K502	88.09						94.5853
55713@20170914_03_MJLorite_iTRAQ.cmpd.rclb.mgf	177.73	707.137	4	0	0.0018	0	2	DWGR	VIFIASESGFNIPVEMIHYGVSK	TADI	MOD:01485 V1;MOD:01485 K23	0	8138	Q2KBC9	Q2KBC9{136-158}	0	0.0001	0.0002	Q2KBC9	65.65						93.3922
43252@20170914_03_MJLorite_iTRAQ.cmpd.rclb.mgf	139.47	620.829	4	0	-0.0032	0	2	DFLK	SPIAHEVWMAQSSFLTPYK	GVST	MOD:01485 S1;MOD:01485 Y18	0	4702	Q2KCC4	Q2KCC4{365-383}	0	0.0001	0.0002	Q2KCC4	60.75						63.6115
37562@20170914_03_MJLorite_iTRAQ.cmpd.rclb.mgf	122.73	726.375	4	0	0.0077	0	2	TGYK	AVSTSFSSLVLPSSGGNYNSGGVQTSVR	QAVS	MOD:01485 A1	0	1654	Q2KCE1	Q2KCE1{38-65}	0	0.0001	0.0002	Q2KCE1	79.78						93.8742
45030@20170914_03_MJLorite_iTRAQ.cmpd.rclb.mgf	144.68	733.382	4	0	0.0045	0	2	GAGR	VANADPDGYTVLLHHIGMATSATLYR	KLAY	MOD:01485 V1	0	8013	Q2K4P7	Q2K4P7{81-106}	0	0.0001	0.0002	Q2K4P7	116.76						110.805
47809@20170914_03_MJLorite_iTRAQ.cmpd.rclb.mgf	152.8	645.371	3	0	0.0063	0	2		TSILTNVAAMAALQTLR	GIND	MOD:01485 T1;MOD:00719 M10	0	5239	Q2KCE9	Q2KCE9{2-18}	0	0.0001	0.0002	Q2KCE9	71.03						109.089
61478@20170914_03_MJLorite_iTRAQ.cmpd.rclb.mgf	195.48	859.229	4	0	0.009	1	2	ESSK	LSALQTQQQLAVQSLSIANSSSQTILSLFRG		MOD:01485 L1	0	5239	Q2KCF0	Q2KCF0{272-302}	0	0.0001	0.0002	Q2KCF0	68.92						91.6465
30291@20170914_03_MJLorite_iTRAQ.cmpd.rclb.mgf	101.42	677.004	3	0	-0.007	0	2	GLDR	TMADGDSFLFGDHTVK	VIET	MOD:01485 T1;MOD:01485 K16	0	8183	Q2K3M6	Q2K3M6{93-108}	0	0.0001	0.0002	Q2K3M6	79.67						114.889
7831@20170914_03_MJLorite_iTRAQ.cmpd.rclb.mgf	35.48	521.272	4	0	0.0004	1	2	NAVK	TATATGADTSGALDEREK	VLKQ	MOD:01485 T1;MOD:01485 K18	0	3383	Q2KCE0	Q2KCE0{179-196}	0	0.0001	0.0002	Q2KCE0	68.22						54.9487
47777@20170914_03_MJLorite_iTRAQ.cmpd.rclb.mgf	152.72	597.082	4	0	0.0027	0	2	RFPR	FGNYAGQTLAHELGHALGLK	HAHE	MOD:01485 F1;MOD:01485 K20	0	7968	Q2KC98	Q2KC98{149-168}	0	0.0001	0.0002	Q2KC98	86.67						76.6008
25899@20170914_03_MJLorite_iTRAQ.cmpd.rclb.mgf	88.53	416.233	4	0	0.0043	0	2	GIEK	AGSAEDAEAVAAALK	GGME	MOD:01485 A1;MOD:01485 K15	0	5167	Q2K5M7	Q2K5M7{314-328}	0	0.0001	0.0002	Q2K5M7	76.68						51.5426
63449@20170914_03_MJLorite_iTRAQ.cmpd.rclb.mgf	201.88	712.153	4	0	-0.0031	0	2	KVVR	TALQDAASVASLLITTEAMIAELPK	KDAP	MOD:01485 T1;MOD:01485 K25	0	6161	Q2KBZ7	Q2KBZ7{502-526}	0	0.0001	0.0002	Q2KBZ7	96.35						86.3197
31820@20170914_03_MJLorite_iTRAQ.cmpd.rclb.mgf	105.9	650.681	3	0	0.0045	0	2		TSINTNNSAMAALQTLR	SINS	MOD:01485 T1	0	5239	Q2K133	Q2K133{2-18}	0	0.0001	0.0002	Q2K133	83.9						115.246
34467@20170914_03_MJLorite_iTRAQ.cmpd.rclb.mgf	113.67	747.127	4	1	0.0147	0	2	TFGK	THGAGDPSFIGAEPEGGAIEDQGLGWK	SSFG	MOD:01485 T1;MOD:01485 K27	0	5718	Q2JZT8	Q2JZT8{264-290}	0	0.0001	0.0002	Q2JZT8	72.22						91.4448
28322@20170914_03_MJLorite_iTRAQ.cmpd.rclb.mgf	95.63	772.899	4	0	0.0055	2	2	GAEK	FKAETGIAYRDFEPTGDTQGEQAIR	NFAS	MOD:01485 F1;MOD:01485 K2	0	2076	Q2KDS5	Q2KDS5{50-74}	0	0.0001	0.0002	Q2KDS5	82.68						75.865
36112@20170914_03_MJLorite_iTRAQ.cmpd.rclb.mgf	118.5	667.021	3	0	0.0133	0	2	ALEK	GTIDAAEFVGPYDDLK	LGFH	MOD:01485 G1;MOD:01485 K16	0	2578	Q2K462	Q2K462{211-226}	0	0.0001	0.0002	Q2K462	68.21						109.415
23145@20170914_03_MJLorite_iTRAQ.cmpd.rclb.mgf	80.45	509.512	4	0	0.0039	0	2	TGIK	VVYDTFDSNETVETK	LLAG	MOD:01485 V1;MOD:01485 K15	0	189	Q2KCA6	Q2KCA6{54-68}	0	0.0001	0.0002	Q2KCA6	60.16						67.0043
42872@20170914_03_MJLorite_iTRAQ.cmpd.rclb.mgf	138.35	775.404	4	0	0.0038	1	2	DYFK	ANNLQYNPVVFEKLDEVNAAYDAGR	CDVY	MOD:01485 A1;MOD:01485 K13	0	6573	Q2K902	Q2K902{173-197}	0	0.0001	0.0002	Q2K902	65.42						99.2418
61623@20170914_03_MJLorite_iTRAQ.cmpd.rclb.mgf	195.9	683.642	4	0	-0.0015	0	2	VLPR	VAALLDVAQVSEIIEVVSPDTFK	RPIY	MOD:01485 V1;MOD:01485 K23	0	2103	Q2JYP2	Q2JYP2{102-124}	0	0.0001	0.0002	Q2JYP2	76.96						118.625
40523@20170914_03_MJLorite_iTRAQ.cmpd.rclb.mgf	131.45	576.067	4	0	0.0045	0	2	LEIR	GLAGVFVDDEISAGIHEGVK	QFPQ	MOD:01485 G1;MOD:01485 K20	0	353	Q2JYG5	Q2JYG5{163-182}	0	0.0001	0.0002	Q2JYG5	69.68						79.5921
34336@20170914_03_MJLorite_iTRAQ.cmpd.rclb.mgf	113.28	575.57	4	0	-0.0029	0	2	ILVK	VNQIGSLTETLDAVNTAHK	AAYT	MOD:01485 V1;MOD:01485 K19	0	10555	Q2K8W9	Q2K8W9{337-355}	0	0.0001	0.0002	Q2K8W9	86.79						90.4347
47353@20170914_03_MJLorite_iTRAQ.cmpd.rclb.mgf	151.45	948.489	3	0	-0.0056	0	2	EGGK	GDFAILSATTTSTNQNIWIDQMK	KQLK	MOD:01485 G1;MOD:01485 K23	0	1153	Q2K0S9	Q2K0S9{153-175}	0	0.0001	0.0002	Q2K0S9	68.64						109.857
53219@20170914_03_MJLorite_iTRAQ.cmpd.rclb.mgf	170.4	599.315	4	0	0.006	0	2	ISKR	IELQENFVSALSDSIDSGIGR	LVDA	MOD:01485 I1	0	5239	Q2KCF0	Q2KCF0{239-259}	0	0.0001	0.0002	Q2KCF0	69.56						78.9632
60365@20170914_03_MJLorite_iTRAQ.cmpd.rclb.mgf	192.07	851.971	4	1	-0.0123	0	2	ESSK	LSALQTQQQLAIQSLSIANSSSQNILSLFR	G	MOD:01485 L1	0	5239	Q2K133	Q2K133{272-301}	0	0.0001	0.0002	Q2K133	60.45						115.9
60200@20170914_03_MJLorite_iTRAQ.cmpd.rclb.mgf	191.6	659.848	4	0	0.0052	0	2	IALK	AGLGEIEIDESELQAAFEDLAK	RFRG	MOD:01485 A1;MOD:01485 K22	0	88	Q2K2P3	Q2K2P3{37-58}	0	0.0001	0.0002	Q2K2P3	100.27						83.7879
15245@20170914_03_MJLorite_iTRAQ.cmpd.rclb.mgf	57.25	623.334	3	1	0.0019	0	2	SMGR	AAVPSGASTGAHEAVELR	DGGK	MOD:01485 A1	0	10555	Q2K8W9	Q2K8W9{35-52}	0	0.0001	0.0002	Q2K8W9	69.11						77.5858
57972@20170914_03_MJLorite_iTRAQ.cmpd.rclb.mgf	185.02	704.622	4	0	0.0025	0	2	LPDR	GSAGAALEADEIQLAAFSAVPLADLDR	ISKV	MOD:01485 G1	0	10010	Q2K249	Q2K249{241-267}	0	0.0001	0.0002	Q2K249	58.85						110.164
42950@20170914_03_MJLorite_iTRAQ.cmpd.rclb.mgf	138.58	600.541	4	0	0.0004	0	2	YAGK	VDGDSESQVAAIESCIADGAK	GILL	MOD:00110 C15;MOD:01485 V1;MOD:01485 K21	0	5517	Q2KD00	Q2KD00{65-85}	0	0.0001	0.0002	Q2KD00	77.24						91.8749
54027@20170914_03_MJLorite_iTRAQ.cmpd.rclb.mgf	172.78	579.803	4	0	-0.0065	0	2	GAAK	VDTAYSAMDSAIDVISEIK	AKIV	MOD:01485 V1;MOD:01485 K19	0	5239	Q2KCE9	Q2KCE9{74-92}	0	0.0001	0.0002	Q2KCE9	78.76						77.1959
24892@20170914_03_MJLorite_iTRAQ.cmpd.rclb.mgf	85.57	578.818	4	0	0.0068	0	2	AETK	ASATTEAAADPAVVAVHDSLK	IFTD	MOD:01485 A1;MOD:01485 K21	0	1972	Q2K708	Q2K708{371-391}	0	0.0001	0.0002	Q2K708	95.6						95.2579
38928@20170914_03_MJLorite_iTRAQ.cmpd.rclb.mgf	126.73	651.076	4	0	0.005	0	2	LITK	HAYQAGAGLVSAFYSDEETTLAR	FQYG	MOD:01485 H1	0	9869	Q2KDI3	Q2KDI3{54-76}	0	0.0001	0.0002	Q2KDI3	97.89						90.4137
24560@20170914_03_MJLorite_iTRAQ.cmpd.rclb.mgf	84.6	599.571	4	0	0.0061	0	2	GDPR	TANQAVQGVYAAGLSASGGDAAK	AGEE	MOD:01485 T1;MOD:01485 K23	0	2394	Q2K678	Q2K678{181-203}	0	0.0001	0.0002	Q2K678	123.7						101.941
61570@20170914_03_MJLorite_iTRAQ.cmpd.rclb.mgf	195.75	878.222	4	0	0.0045	0	2	NINK	GNIQPLPIAVTDFLQGDMGAQVSQVIAADLQR	SGLF	MOD:01485 G1	0	9537	Q2K4L8	Q2K4L8{37-68}	0	0.0001	0.0002	Q2K4L8	97.63						113.804
28272@20170914_03_MJLorite_iTRAQ.cmpd.rclb.mgf	95.5	549.801	4	0	-0.0037	0	2	GLSR	FVSDALSASERPELTSAK	VIIS	MOD:01485 F1;MOD:01485 K18	0	2103	Q2JYP2	Q2JYP2{177-194}	0	0.0001	0.0002	Q2JYP2	59.5						86.0321
51742@20170914_03_MJLorite_iTRAQ.cmpd.rclb.mgf	164.47	600.589	4	0	0.0072	0	2	AKMK	EAGVSIIYWGGLHTEAGLIIR	QAAD	MOD:01485 E1	0	3055	Q2K502	Q2K502{213-233}	0	0.0001	0.0002	Q2K502	62.28						81.0398
56507@20170914_03_MJLorite_iTRAQ.cmpd.rclb.mgf	180.72	774.808	5	0	0.0085	0	2	DTVR	TTLASYTLGSDLENLTYSGTVAFTGTGNSLANTIK	GGAG	MOD:01485 T1;MOD:01485 K35	0	6947	Q2KC97	Q2KC97{546-580,1149-1183}	0	0.0001	0.0002	Q2KC97	119.93						94.373
21284@20170914_03_MJLorite_iTRAQ.cmpd.rclb.mgf	74.98	549.803	4	0	0.0059	0	2	NGQR	IPQPANPDGPATTTTIEGK	YGTL	MOD:01485 I1;MOD:01485 K19	0	3114	Q2K4M9	Q2K4M9{48-66}	0	0.0001	0.0002	Q2K4M9	70.83						53.2115
42739@20170914_03_MJLorite_iTRAQ.cmpd.rclb.mgf	137.97	600.541	4	0	0.0007	0	2	YAGK	VDGDSESQVAAIESCIADGAK	GILL	MOD:00110 C15;MOD:01485 V1;MOD:01485 K21	0	5517	Q2KD00	Q2KD00{65-85}	0	0.0001	0.0002	Q2KD00	64.91						98.3796
45546@20170914_03_MJLorite_iTRAQ.cmpd.rclb.mgf	146.18	796.145	4	0	-0.0011	1	2	FNLR	GAVFADAGTLFGNDVDLRGDGIEGEDASLR	ASVG	MOD:01485 G1	0	2957	Q2K8Y0	Q2K8Y0{707-736}	0	0.0001	0.0002	Q2K8Y0	67.48						96.2535
9994@20170914_03_MJLorite_iTRAQ.cmpd.rclb.mgf	41.82	662.314	4	0	0.0123	0	2	QYGR	HNLSAVGQEGNDNYGATYQHGNR	NVAG	MOD:01485 H1	0	2383	Q2K0F5	Q2K0F5{69-91}	0	0.0001	0.0002	Q2K0F5	85.95						83.161
43840@20170914_03_MJLorite_iTRAQ.cmpd.rclb.mgf	141.18	867.442	3	0	0.0084	0	2	IADK	YGDGQATTGLNMMTDLITANPK	LVGV	MOD:01485 Y1;MOD:01485 K22	0	8759	Q2KCX3	Q2KCX3{202-223}	0	0.0001	0.0002	Q2KCX3	79.56						131.417
60364@20170914_03_MJLorite_iTRAQ.cmpd.rclb.mgf	192.07	851.971	4	1	-0.0123	0	2	ESSK	LSALQTQQQLAIQSLSIANSSSQNILSLFR	G	MOD:01485 L1	0	5239	Q2K133	Q2K133{272-301}	0	0.0001	0.0002	Q2K133	60.98						120.296
16506@20170914_03_MJLorite_iTRAQ.cmpd.rclb.mgf	60.95	750.88	2	0	0.0025	0	2		AEAAPLYDTYSR	APLR	MOD:01485 A1	0	7757	Q2KCV1	Q2KCV1{2-13}	0	0.0001	0.0002	Q2KCV1	61.27						150.015
54687@20170914_03_MJLorite_iTRAQ.cmpd.rclb.mgf	174.72	574.592	4	0	0.0027	0	2	PLSK	TPLSLLLAQHIDLSAGMVK	GVKE	MOD:01485 T1;MOD:01485 K19	0	6831	Q2K370	Q2K370{123-141}	0	0.0001	0.0002	Q2K370	99.13						83.32
21110@20170914_03_MJLorite_iTRAQ.cmpd.rclb.mgf	74.48	549.803	4	0	0.0064	0	2	NGQR	IPQPANPDGPATTTTIEGK	YGTL	MOD:01485 I1;MOD:01485 K19	0	3114	Q2K4M9	Q2K4M9{48-66}	0	0.0001	0.0002	Q2K4M9	67.58						58.7415
64617@20170914_03_MJLorite_iTRAQ.cmpd.rclb.mgf	206.27	906.218	4	0	0.0086	0	2	RLIR	DSANVDYYATFDNFQVGVLQANSIVDGLGLK	DGKG	MOD:01485 D1;MOD:01485 K31	0	5613	Q2K5F5	Q2K5F5{120-150}	0	0.0001	0.0002	Q2K5F5	69.09						108.274
53366@20170914_03_MJLorite_iTRAQ.cmpd.rclb.mgf	170.83	581.332	4	0	0.0035	0	2	LTAK	NIPAEAFTLNAYAAVEVLK	AGIE	MOD:01485 N1;MOD:01485 K19	0	5167	Q2K5M7	Q2K5M7{290-308}	0	0.0001	0.0002	Q2K5M7	83.26						91.8359
21432@20170914_03_MJLorite_iTRAQ.cmpd.rclb.mgf	75.42	473.005	4	0	0.0053	0	2	EKAR	GITISTAHVEYETPAR	HYAH	MOD:01485 G1	0	9836	Q2K9N2	Q2K9N2{55-70}	0	0.0001	0.0002	Q2K9L8;Q2K9N2	77.62						75.7162
50534@20170914_03_MJLorite_iTRAQ.cmpd.rclb.mgf	160.82	686.349	4	0	0.0093	0	2	FAPK	ILDTGIYDEVVTVTNDEAFEQAR	LVAR	MOD:01485 I1	0	1546	Q2KDD9	Q2KDD9{241-263}	0	0.0001	0.0002	Q2KDD9	73.02						76.0596
48710@20170914_03_MJLorite_iTRAQ.cmpd.rclb.mgf	155.43	638.339	4	0	0.0011	1	2	SISK	RIELQENFVSALSDSIDSGIGR	LVDA	MOD:01485 R1	0	5239	Q2KCF0	Q2KCF0{238-259}	0	0.0001	0.0002	Q2KCF0	64.7						80.3588
21850@20170914_03_MJLorite_iTRAQ.cmpd.rclb.mgf	76.65	473.012	4	0	-0.0061	0	2	APAR	QIAENAGDEASIVVGK	ILDK	MOD:01485 Q1;MOD:01485 K16	0	6161	Q2KBZ7	Q2KBZ7{452-467}	0	0.0001	0.0002	Q2KBZ7	94.04						64.5522
26469@20170914_03_MJLorite_iTRAQ.cmpd.rclb.mgf	90.2	490.517	4	0	-0.0011	0	2	AEER	GIHAFGQASDMIAAGPK	AQLT	MOD:01485 G1;MOD:01485 K17	0	10500	Q2K8G8	Q2K8G8{230-246}	0	0.0001	0.0002	Q2K8G8	62.51						57.2071
34412@20170914_03_MJLorite_iTRAQ.cmpd.rclb.mgf	113.5	767.094	3	0	0.009	0	2	ILVK	VNQIGSLTETLDAVNTAHK	AAYT	MOD:01485 V1;MOD:01485 K19	0	10555	Q2K8W9	Q2K8W9{337-355}	0	0.0001	0.0002	Q2K8W9	86.61						124.668
45533@20170914_03_MJLorite_iTRAQ.cmpd.rclb.mgf	146.15	622.59	4	0	-0.0032	0	2	SALK	NLTLLTPEVQASDAWLGGGEK	AGAG	MOD:01485 N1;MOD:01485 K21	0	4710	Q2K163	Q2K163{276-296}	0	0.0001	0.0002	Q2K163	58.72						81.0211
56066@20170914_03_MJLorite_iTRAQ.cmpd.rclb.mgf	178.98	913.117	3	0	-0.0026	0	2	FHVK	ADGSFTYDLTADLDAGVTYTEVLR	YYKI	MOD:01485 A1	0	201	Q2K1Q3	Q2K1Q3{184-207}	0	0.0001	0.0002	Q2K1Q3	105.33						147.847
61337@20170914_03_MJLorite_iTRAQ.cmpd.rclb.mgf	194.97	844.973	4	0	0.0089	0	2	ESSK	LSALQTQQQLAVQSLSIANSSSQTILSLFR	G	MOD:01485 L1	0	5239	Q2KCF0	Q2KCF0{272-301}	0	0.0001	0.0002	Q2KCF0	60.67						127.111
45678@20170914_03_MJLorite_iTRAQ.cmpd.rclb.mgf	146.58	565.294	4	0	-0.0007	0	2	GAAK	VDTAYSAMDSAIDVVGDIK	AKLV	MOD:01485 V1;MOD:01485 K19	0	5239	Q2KCF0	Q2KCF0{74-92}	0	0.0001	0.0002	Q2KCF0	72.48						72.4309
62649@20170914_03_MJLorite_iTRAQ.cmpd.rclb.mgf	198.93	778.196	4	0	0.0048	0	2	ALEK	AGILPLAVGGQPWQAAGAFDVLMVAIAGK	DTFN	MOD:01485 A1;MOD:01485 K29	0	2233	Q2K7E8	Q2K7E8{175-203}	0	0.0001	0.0002	Q2K7E8	87.08						103.406
64799@20170914_03_MJLorite_iTRAQ.cmpd.rclb.mgf	210.02	906.47	4	1	0.0162	0	2	RLIR	DSANVDYYATFDNFQVGVLQANSIVDGLGLK	DGKG	MOD:01485 D1;MOD:01485 K31	0	5613	Q2K5F5	Q2K5F5{120-150}	0	0.0001	0.0002	Q2K5F5	71.31						126.768
22083@20170914_03_MJLorite_iTRAQ.cmpd.rclb.mgf	77.33	661.383	2	1	-0.0105	0	2	GPFK	LTSIDIDAGK	ITFE	MOD:01485 L1;MOD:01485 K10	0	10529	Q2K1V9	Q2K1V9{225-234}	0	0.0001	0.0002	Q2K1V9	69.99						111.752
42836@20170914_03_MJLorite_iTRAQ.cmpd.rclb.mgf	138.23	643.331	4	0	0.0057	0	2	NIEK	GFDASLAGTGSSDLPDIPAEFSK	TPFV	MOD:01485 G1;MOD:01485 K23	0	7659	Q2K8D8	Q2K8D8{91-113}	0	0.0001	0.0002	Q2K8D8	80.86						90.7836
60732@20170914_03_MJLorite_iTRAQ.cmpd.rclb.mgf	193.15	1039.8	4	0	0.0068	0	2	QGLK	ATLVSGDGIVSNELASIAGDAVAGTLNTFGPDPTLNPANK	ELVE	MOD:01485 A1;MOD:01485 K40	0	3055	Q2K502	Q2K502{242-281}	0	0.0001	0.0002	Q2K502	75.46						125.327
43147@20170914_03_MJLorite_iTRAQ.cmpd.rclb.mgf	139.15	805.768	3	0	-0.0075	0	2		PINITMPALSPTMEEGNLAK	WLVK	MOD:01485 P1;MOD:01485 K20	0	4223	Q2K8W5	Q2K8W5{2-21}	0	0.0001	0.0002	Q2K8W5	79.46						122.947
37898@20170914_03_MJLorite_iTRAQ.cmpd.rclb.mgf	123.72	448.503	4	0	0.0055	0	2	GMEK	NVLIVSVDGGCPGVK	SVKE	MOD:00110 C11;MOD:01485 N1;MOD:01485 K15	0	5517	Q2KD00	Q2KD00{251-265}	0	0.0001	0.0002	Q2KD00	64.21						58.657
50857@20170914_03_MJLorite_iTRAQ.cmpd.rclb.mgf	161.77	600.588	4	0	0.0032	0	2	AKMK	EAGVSIIYWGGLHTEAGLIIR	QAAD	MOD:01485 E1	0	3055	Q2K502	Q2K502{213-233}	0	0.0001	0.0002	Q2K502	73.99						87.1867
45714@20170914_03_MJLorite_iTRAQ.cmpd.rclb.mgf	146.68	638.587	4	0	-0.0005	0	2	LMTK	TAPPGVSGFNWAEAQSAFLQGK	IGMW	MOD:01485 T1;MOD:01485 K22	0	376	Q2JZJ7	Q2JZJ7{256-277}	0	0.0001	0.0002	Q2JZJ7	69.83						88.3981
24506@20170914_03_MJLorite_iTRAQ.cmpd.rclb.mgf	84.45	640.685	3	0	0.0091	0	2		TSINTNSSAQAALQTLR	NVNQ	MOD:01485 T1	0	5239	Q2KCF1	Q2KCF1{2-18}	0	0.0001	0.0002	Q2KCF1	91.68						100.538
47518@20170914_03_MJLorite_iTRAQ.cmpd.rclb.mgf	151.95	751.89	4	0	0.0027	0	2	HGKR	NAALIGAGIGALAGGAIGNYMDQQEAELR	AQLE	MOD:01485 N1;MOD:00719 M21	0	998	Q2K6F8	Q2K6F8{60-88}	0	0.0001	0.0002	Q2K6F8	69.38						93.0059
60349@20170914_03_MJLorite_iTRAQ.cmpd.rclb.mgf	192.03	546.083	4	0	-0.0038	0	2	ARNK	IALIGSGMIGGTLAHLAGLK	ELGD	MOD:01485 I1;MOD:01485 K20	0	1302	Q2K3E9	Q2K3E9{6-25}	0	0.0001	0.0002	Q2K3E9	80.57						95.5922
35088@20170914_03_MJLorite_iTRAQ.cmpd.rclb.mgf	115.48	652.585	4	0	0.0054	0	2	FKAK	YGLEVNELNPDAGSGDEVEAIK	ANKG	MOD:01485 Y1;MOD:01485 K22	0	2394	Q2K678	Q2K678{64-85}	0	0.0001	0.0002	Q2K678	90.94						91.1815
60596@20170914_03_MJLorite_iTRAQ.cmpd.rclb.mgf	192.75	832.043	5	0	0.0119	0	2	QGLK	ATLVSGDGIVSNELASIAGDAVAGTLNTFGPDPTLNPANK	ELVE	MOD:01485 A1;MOD:01485 K40	0	3055	Q2K502	Q2K502{242-281}	0	0.0001	0.0002	Q2K502	88.64						92.6535
40876@20170914_03_MJLorite_iTRAQ.cmpd.rclb.mgf	132.48	465.017	4	0	0.0003	0	2	DMVK	ALISQALFFNESTK	VAA	MOD:01485 A1;MOD:01485 K14	0	2718	Q2K547	Q2K547{248-261}	0	0.0001	0.0002	Q2K547	69.22						54.2677
49149@20170914_03_MJLorite_iTRAQ.cmpd.rclb.mgf	156.73	638.34	4	0	0.0028	1	2	SISK	RIELQENFVSALSDSIDSGIGR	LVDA	MOD:01485 R1	0	5239	Q2KCF0	Q2KCF0{238-259}	0	0.0001	0.0002	Q2KCF0	78.05						64.4715
61188@20170914_03_MJLorite_iTRAQ.cmpd.rclb.mgf	194.53	851.726	4	0	0.0084	0	2	ESSK	LSALQTQQQLAIQSLSIANSSSQNILSLFR	G	MOD:01485 L1	0	5239	Q2K133	Q2K133{272-301}	0	0.0001	0.0002	Q2K133	118.46						114.64
53181@20170914_03_MJLorite_iTRAQ.cmpd.rclb.mgf	170.28	865.749	3	0	0.0087	0	2	KDGK	MLATVEQYGAQMAVMGIDYGMR	ELAG	MOD:01485 M1;MOD:00719 M15	0	3790	Q2KCK8	Q2KCK8{283-304}	0	0.0001	0.0002	Q2KCK8	68.29						121.235
42938@20170914_03_MJLorite_iTRAQ.cmpd.rclb.mgf	138.53	789.655	4	0	-0.0025	0	2	FEQK	TFQQLQASGGMILNSDQAPDVLEYNK	GNAT	MOD:01485 T1;MOD:01485 K26	0	898	Q2K239	Q2K239{66-91}	0	0.0001	0.0002	Q2K239	114.64						98.0556
41196@20170914_03_MJLorite_iTRAQ.cmpd.rclb.mgf	133.42	756.419	3	0	0.0066	0	2		TIYQNLIAGEWVGTNATK	NINP	MOD:01485 T1;MOD:01485 K18	0	3487	Q2K5F9	Q2K5F9{2-19}	0	0.0001	0.0002	Q2K5F9	89.79						125.041
31569@20170914_03_MJLorite_iTRAQ.cmpd.rclb.mgf	105.18	531.529	4	0	0.0021	0	2	FVSK	EVLEDPAVYPTDEVMK	GLFT	MOD:01485 E1;MOD:01485 K16	0	189	Q2KCA6	Q2KCA6{323-338}	0	0.0001	0.0002	Q2KCA6	70.03						66.9543
44240@20170914_03_MJLorite_iTRAQ.cmpd.rclb.mgf	142.37	599.088	4	0	0.004	0	2	REYK	VSFLAPLGLSTESEASAAGVAK	LIEQ	MOD:01485 V1;MOD:01485 K22	0	10479	Q2KBK4	Q2KBK4{205-226}	0	0.0001	0.0002	Q2KBK4	107.04						83.7881
45852@20170914_03_MJLorite_iTRAQ.cmpd.rclb.mgf	147.08	831.426	3	0	0.0049	0	2	DESK	TNYGYTVGAGVEAFVTNNITTR	LEYR	MOD:01485 T1	0	5698	Q2KA52	Q2KA52{153-174}	0	0.0001	0.0002	Q2KA52	123.99						129.112
51726@20170914_03_MJLorite_iTRAQ.cmpd.rclb.mgf	164.42	767.209	5	1	-0.0154	0	2	DGVK	FVIGHFNSGVSIPASEVYAENGILEITPAATNPK	FTER	MOD:01485 F1;MOD:01485 K34	0	3055	Q2K502	Q2K502{94-127}	0	0.0001	0.0002	Q2K502	58.56						66.5398
51562@20170914_03_MJLorite_iTRAQ.cmpd.rclb.mgf	163.95	638.339	4	0	0.0005	1	2	SISK	RIELQENFVSALSDSIDSGIGR	LVDA	MOD:01485 R1	0	5239	Q2KCF0	Q2KCF0{238-259}	0	0.0001	0.0002	Q2KCF0	77.88						68.4597
33957@20170914_03_MJLorite_iTRAQ.cmpd.rclb.mgf	112.18	747.368	4	0	0.0074	0	2	DAAK	AMVDQGVDVLTQHTDTTAPMQVAEER	GIHA	MOD:01485 A1	0	10500	Q2K8G8	Q2K8G8{204-229}	0	0.0001	0.0002	Q2K8G8	148.95						111.599
54748@20170914_03_MJLorite_iTRAQ.cmpd.rclb.mgf	174.9	584.592	4	0	0.0019	0	2	TDAK	VDAVLSPYDGLSIGIISSLK	GVGY	MOD:01485 V1;MOD:01485 K20	0	5613	Q2K5F5	Q2K5F5{229-248}	0	0.0001	0.0002	Q2K5F5	92.83						78.7081
61778@20170914_03_MJLorite_iTRAQ.cmpd.rclb.mgf	196.37	757.912	4	0	-0.0051	0	2	AKTK	ALASAFETLGLTNALFIGGAELDGNFK	LAAQ	MOD:01485 A1;MOD:01485 K27	0	3095	Q2K9L5	Q2K9L5{137-163}	0	0.0001	0.0002	Q2K9L5	64.97						111.215
51030@20170914_03_MJLorite_iTRAQ.cmpd.rclb.mgf	162.27	929.215	4	0	0.0074	0	2	NIVK	QLQAAGYGTDLQYGDDDIPNQLSQIENMVTK	GVKV	MOD:01485 Q1;MOD:01485 K31	0	5613	Q2K5F5	Q2K5F5{52-82}	0	0.0001	0.0002	Q2K5F5	137.14						123.327
21307@20170914_03_MJLorite_iTRAQ.cmpd.rclb.mgf	75.07	430.5	4	0	0.0023	0	2	PSVK	SIIAGEQHSTIFK	DTRE	MOD:01485 S1;MOD:01485 K13	0	5613	Q2K5F5	Q2K5F5{274-286}	0	0.0001	0.0002	Q2K5F5	76.38						91.1096
51263@20170914_03_MJLorite_iTRAQ.cmpd.rclb.mgf	162.98	636.36	4	0	0.0003	0	2	MDVR	NTQPVTGIAESIQQTLAQAGVK	LEII	MOD:01485 N1;MOD:01485 K22	0	3376	Q2K350	Q2K350{390-411}	0	0.0001	0.0002	Q2K350	97.58						85.0025
55874@20170914_03_MJLorite_iTRAQ.cmpd.rclb.mgf	178.25	635.372	3	0	0.0096	0	2	FNEK	DMSLLEINPLIVMK	NGHL	MOD:01485 D1;MOD:01485 K14	0	1104	Q2K3F0	Q2K3F0{202-215}	0	0.0001	0.0002	Q2K3F0	82.1						94.6519
56520@20170914_03_MJLorite_iTRAQ.cmpd.rclb.mgf	180.75	968.258	4	0	0.0095	0	2	DTVR	TTLASYTLGSDLENLTYSGTVAFTGTGNSLANTIK	GGAG	MOD:01485 T1;MOD:01485 K35	0	6947	Q2KC97	Q2KC97{546-580,1149-1183}	0	0.0001	0.0002	Q2KC97	116.78						132.79
50482@20170914_03_MJLorite_iTRAQ.cmpd.rclb.mgf	160.65	707.363	4	0	-0.0014	0	2	VVRK	AITAGEIDIYPEYTGNAGFFFNK	ADDA	MOD:01485 A1;MOD:01485 K23	0	8956	Q2KCY0	Q2KCY0{67-89}	0	0.0001	0.0002	Q2KCY0	66.21						88.9186
49672@20170914_03_MJLorite_iTRAQ.cmpd.rclb.mgf	158.27	784.166	4	0	-0.0065	0	2	ELTK	NQIDQGADVIYAAAGATGLGVLQTAADNK	KLSI	MOD:01485 N1;MOD:01485 K29	0	2076	Q2KDS5	Q2KDS5{201-229}	0	0.0001	0.0002	Q2KDS5	91						85.0884
55021@20170914_03_MJLorite_iTRAQ.cmpd.rclb.mgf	175.7	634.849	4	0	0.0061	0	2	AFMR	NSGEGIPLLLDAGHLAFAGGDVLR	AIDN	MOD:01485 N1	0	4354	Q2KAJ0	Q2KAJ0{172-195}	0	0.0001	0.0002	Q2KAJ0	62.13						94.9387
44597@20170914_03_MJLorite_iTRAQ.cmpd.rclb.mgf	143.42	534.045	4	0	0.0029	0	2	DAWK	VGLTVDYQIVDNFYAK	ASVQ	MOD:01485 V1;MOD:01485 K16	0	6045	Q2K7H2;Q2KAI4	Q2K7H2{300-315};Q2KAI4{300-315}	0	0.0001	0.0002	Q2K7H2;Q2KAI4	74.82						73.3343
57539@20170914_03_MJLorite_iTRAQ.cmpd.rclb.mgf	183.73	938.746	4	0	0.0036	0	2	LDMK	ATDLDLEITEATPANVEQAGATTVPAHLLYDIVR	KLSD	MOD:01485 A1	0	5744	Q2KDE6	Q2KDE6{46-79}	0	0.0001	0.0002	Q2KDE6	65.1						86.7478
62387@20170914_03_MJLorite_iTRAQ.cmpd.rclb.mgf	198.15	828.446	4	0	0.0197	0	2	YGER	IAWHGGFDEVPPGFTLIAANELFDAIPIR	QFVR	MOD:01485 I1	0	2117	Q2K5V0	Q2K5V0{137-165}	0	0.0001	0.0002	Q2K5V0	62.57						75.6859
60338@20170914_03_MJLorite_iTRAQ.cmpd.rclb.mgf	192	906.216	4	0	0.0027	0	2	RLIR	DSANVDYYATFDNFQVGVLQANSIVDGLGLK	DGKG	MOD:01485 D1;MOD:01485 K31	0	5613	Q2K5F5	Q2K5F5{120-150}	0	0.0001	0.0002	Q2K5F5	83.64						125.951
53157@20170914_03_MJLorite_iTRAQ.cmpd.rclb.mgf	170.22	564.57	4	0	0.0001	0	2	LAGR	LGLADQLVDHIEATVSSAK	TTLS	MOD:01485 L1;MOD:01485 K19	0	2196	Q2K447	Q2K447{216-234}	0	0.0001	0.0002	Q2K447	67.9						79.1896
61154@20170914_03_MJLorite_iTRAQ.cmpd.rclb.mgf	194.42	807.003	5	1	0.0164	0	2	MTTR	QSSFSYEELIACAHGELFGPGNAQLPLPPMLMVHR	ITDI	MOD:00110 C12;MOD:01485 Q1	0	5519	Q2KE04	Q2KE04{5-39}	0	0.0001	0.0002	Q2KE04	80.29						108.399
52370@20170914_03_MJLorite_iTRAQ.cmpd.rclb.mgf	167.08	510.297	3	0	-0.0142	0	2	QAEK	LVSMFIANFAK	FEDH	MOD:01485 L1;MOD:01485 K11	0	7556	Q2KE66	Q2KE66{505-515}	0	0.0001	0.0002	Q2KE66	61.08						72.3437
23826@20170914_03_MJLorite_iTRAQ.cmpd.rclb.mgf	82.43	960.52	2	0	0.0011	0	2		TSINTNSSAQAALQTLR	NVNQ	MOD:01485 T1	0	5239	Q2KCF1	Q2KCF1{2-18}	0	0.0001	0.0002	Q2KCF1	87.26						157.305
60470@20170914_03_MJLorite_iTRAQ.cmpd.rclb.mgf	192.38	661.365	5	0	0.0005	0	2	ISPK	GVIALIQDTNAVVEDNVLTGGGFGISAQAGK	TIAI	MOD:01485 G1;MOD:01485 K31	0	1972	Q2K708	Q2K708{209-239}	0	0.0001	0.0002	Q2K708	99.37						88.8349
50947@20170914_03_MJLorite_iTRAQ.cmpd.rclb.mgf	162.03	600.588	4	0	0.0047	0	2	AKMK	EAGVSIIYWGGLHTEAGLIIR	QAAD	MOD:01485 E1	0	3055	Q2K502	Q2K502{213-233}	0	0.0001	0.0002	Q2K502	62.84						77.4114
58120@20170914_03_MJLorite_iTRAQ.cmpd.rclb.mgf	185.47	704.623	4	0	0.003	0	2	LPDR	GSAGAALEADEIQLAAFSAVPLADLDR	ISKV	MOD:01485 G1	0	10010	Q2K249	Q2K249{241-267}	0	0.0001	0.0002	Q2K249	74.72						113.846
51096@20170914_03_MJLorite_iTRAQ.cmpd.rclb.mgf	162.47	619.813	6	0	0.0116	0	2	NIVK	QLQAAGYGTDLQYGDDDIPNQLSQIENMVTK	GVKV	MOD:01485 Q1;MOD:01485 K31	0	5613	Q2K5F5	Q2K5F5{52-82}	0	0.0001	0.0002	Q2K5F5	61.11						57.1225
60248@20170914_03_MJLorite_iTRAQ.cmpd.rclb.mgf	191.73	906.216	4	0	0.0026	0	2	RLIR	DSANVDYYATFDNFQVGVLQANSIVDGLGLK	DGKG	MOD:01485 D1;MOD:01485 K31	0	5613	Q2K5F5	Q2K5F5{120-150}	0	0.0001	0.0002	Q2K5F5	78.25						116.891
47561@20170914_03_MJLorite_iTRAQ.cmpd.rclb.mgf	152.07	867.464	3	1	0.0039	0	2	GNDR	AALLNEVTNWPTYYPSSLSGK	QIAE	MOD:01485 A1;MOD:01485 K21	0	5835	Q2JZD7	Q2JZD7{187-207}	0	0.0001	0.0002	Q2JZD7	69.46						123.487
42476@20170914_03_MJLorite_iTRAQ.cmpd.rclb.mgf	137.18	650.103	4	0	-0.0018	1	2	GFAK	DKVTFTGQEFSALLPSVANER	FDVA	MOD:01485 D1;MOD:01485 K2	0	6463	Q2JZ41	Q2JZ41{85-105}	0	0.0001	0.0002	Q2JZ41	62.12						100.365
35469@20170914_03_MJLorite_iTRAQ.cmpd.rclb.mgf	116.62	574.556	4	0	-0.0068	0	2	AASR	VDVSDPVAAWAEHNANLAK	RSAW	MOD:01485 V1;MOD:01485 K19	0	9869	Q2KDI3	Q2KDI3{187-205}	0	0.0001	0.0002	Q2KDI3	89.19						107.133
64807@20170914_03_MJLorite_iTRAQ.cmpd.rclb.mgf	210.37	775.431	5	1	0.0035	0	2	AVPK	EMLTVVDKPIIQYVVDEALEAGIEHLVFVTGR	NKHI	MOD:01485 E1;MOD:01485 K8	0	7180	Q2K4B9	Q2K4B9{31-62}	0	0.0001	0.0002	Q2K4B9	66.01						85.3047
34614@20170914_03_MJLorite_iTRAQ.cmpd.rclb.mgf	114.1	629.332	4	0	0.0041	0	2	QGVK	ADAVAAGASAAAADEALAGAEIDPK	VLSR	MOD:01485 A1;MOD:01485 K25	0	2517	Q2K699	Q2K699{51-75}	0	0.0001	0.0002	Q2K699	95.77						96.6699
18910@20170914_03_MJLorite_iTRAQ.cmpd.rclb.mgf	68.02	408.983	4	0	-0.0047	0	2	AMQK	VGNEGVITVEEAK	TAET	MOD:01485 V1;MOD:01485 K13	0	6161	Q2KAU2;Q2KBZ7	Q2KAU2{169-181};Q2KBZ7{169-181}	0	0.0001	0.0002	Q2KAU2;Q2KBZ7	59.58						43.0834
42921@20170914_03_MJLorite_iTRAQ.cmpd.rclb.mgf	138.5	643.331	4	0	0.0058	0	2	NIEK	GFDASLAGTGSSDLPDIPAEFSK	TPFV	MOD:01485 G1;MOD:01485 K23	0	7659	Q2K8D8	Q2K8D8{91-113}	0	0.0001	0.0002	Q2K8D8	80.69						82.5065
56291@20170914_03_MJLorite_iTRAQ.cmpd.rclb.mgf	180.08	710.368	4	0	0.0031	0	2	EKFK	AAGFNPEAYTLYSYAAMQAIAGAAK	AAGS	MOD:01485 A1;MOD:01485 K25	0	3055	Q2K502	Q2K502{289-313}	0	0.0001	0.0002	Q2K502	75.1						86.2229
39933@20170914_03_MJLorite_iTRAQ.cmpd.rclb.mgf	129.72	696.125	4	0	0.0014	0	2	MFFR	QAAGAGGPQLYSIDLTGYNEQLVK	TPSY	MOD:01485 Q1;MOD:01485 K24	0	9537	Q2K4L8	Q2K4L8{398-421}	0	0.0001	0.0002	Q2K4L8	82.51						90.2575
51694@20170914_03_MJLorite_iTRAQ.cmpd.rclb.mgf	164.33	743.573	5	0	0.0026	0	2	NIVK	QLQAAGYGTDLQYGDDDIPNQLSQIENMVTK	GVKV	MOD:01485 Q1;MOD:01485 K31	0	5613	Q2K5F5	Q2K5F5{52-82}	0	0.0001	0.0002	Q2K5F5	62.94						82.5967
49420@20170914_03_MJLorite_iTRAQ.cmpd.rclb.mgf	157.53	638.339	4	0	-0.0006	1	2	SISK	RIELQENFVSALSDSIDSGIGR	LVDA	MOD:01485 R1	0	5239	Q2KCF0	Q2KCF0{238-259}	0	0.0001	0.0002	Q2KCF0	76.63						72.6547
29352@20170914_03_MJLorite_iTRAQ.cmpd.rclb.mgf	98.67	556.047	4	0	-0.0012	0	2	VGAR	FAELGTAPSSDADATPAALK	AKLE	MOD:01485 F1;MOD:01485 K20	0	8013	Q2K4P7	Q2K4P7{286-305}	0	0.0001	0.0002	Q2K4P7	93.71						79.8525
39501@20170914_03_MJLorite_iTRAQ.cmpd.rclb.mgf	128.45	604.579	4	0	0.0066	0	2	KANK	GNTGPQAPDVIDVGLSFGPSAK	KDGL	MOD:01485 G1;MOD:01485 K22	0	2394	Q2K678	Q2K678{89-110}	0	0.0001	0.0002	Q2K678	60.12						76.0203
55988@20170914_03_MJLorite_iTRAQ.cmpd.rclb.mgf	178.68	672.38	4	0	0.002	0	2	ACRR	SGKPVVVATQMLESMISAPVPTR	AEVS	MOD:01485 S1;MOD:01485 K3	0	110	Q2K4D8	Q2K4D8{269-291}	0	0.0001	0.0002	Q2K4D8	73.36						73.4911
59133@20170914_03_MJLorite_iTRAQ.cmpd.rclb.mgf	188.43	553.56	4	0	0.0038	0	2	FASR	GFNPVVAVSFAWTSAIEK	VAAE	MOD:01485 G1;MOD:01485 K18	0	2076	Q2KDS5	Q2KDS5{80-97}	0	0.0001	0.0002	Q2KDS5	75.64						73.6612
33275@20170914_03_MJLorite_iTRAQ.cmpd.rclb.mgf	110.17	854.668	4	0	0.0117	0	2	NVTK	TGEHTDGNGIIIDDFQSTQASGNPNYTFK	TLVD	MOD:01485 T1;MOD:01485 K29	0	8866	Q2K908	Q2K908{189-217}	0	0.0001	0.0002	Q2K908	68.01						93.832
43336@20170914_03_MJLorite_iTRAQ.cmpd.rclb.mgf	139.72	514.304	4	0	0.0056	1	2		AVSANRLELLQIADAVAR	EKVI	MOD:01485 A1	0	7463	Q2KDZ3	Q2KDZ3{2-19}	0	0.0001	0.0002	Q2KDZ3	58.62						70.2352
49776@20170914_03_MJLorite_iTRAQ.cmpd.rclb.mgf	158.58	589.821	4	0	0.0153	0	2	SMGR	VVIFAGGTGNPFFTTDSAAALR	AAEM	MOD:01485 V1	0	9737	Q2K8Y5	Q2K8Y5{129-150}	0	0.0001	0.0002	Q2K8Y5	67.81						90.7916
49837@20170914_03_MJLorite_iTRAQ.cmpd.rclb.mgf	158.77	595.328	4	0	-0.0021	1	2	EAVR	ATENDGIVFLDEIDKIAAR	DGGM	MOD:01485 A1;MOD:01485 K15	0	4853	Q2KE54	Q2KE54{238-256}	0	0.0001	0.0002	Q2KE54	60.77						74.7481
46671@20170914_03_MJLorite_iTRAQ.cmpd.rclb.mgf	149.48	598.347	4	0	0.0045	0	2	TPGR	SVLIEPTSGNTGIALAFAAAAK	GYRL	MOD:01485 S1;MOD:01485 K22	0	1546	Q2KDD9	Q2KDD9{75-96}	0	0.0001	0.0002	Q2KDD9	81.54						87.852
51502@20170914_03_MJLorite_iTRAQ.cmpd.rclb.mgf	163.77	634.322	4	0	0.0075	0	2	GTIK	SGALEGSNVDLAGELTEMIEAQR	SYTA	MOD:01485 S1	0	1654	Q2KCE1	Q2KCE1{388-410}	0	0.0001	0.0002	Q2KCE1	98.23						75.9075
30813@20170914_03_MJLorite_iTRAQ.cmpd.rclb.mgf	102.95	775.414	4	0	0.0024	0	2	GVFK	GNLDSGANIAPVAPATLPSANAATTTADTK	KFSM	MOD:01485 G1;MOD:01485 K30	0	1654	Q2KCE1	Q2KCE1{166-195}	0	0.0001	0.0002	Q2KCE1	93.01						121.797
56593@20170914_03_MJLorite_iTRAQ.cmpd.rclb.mgf	180.97	774.808	5	0	0.0086	0	2	DTVR	TTLASYTLGSDLENLTYSGTVAFTGTGNSLANTIK	GGAG	MOD:01485 T1;MOD:01485 K35	0	6947	Q2KC97	Q2KC97{546-580,1149-1183}	0	0.0001	0.0002	Q2KC97	113.7						101.469
52398@20170914_03_MJLorite_iTRAQ.cmpd.rclb.mgf	167.25	640.037	3	0	-0.0001	0	2		TSILTNVAAMAALQTLR	GIND	MOD:01485 T1	0	5239	Q2KCE9	Q2KCE9{2-18}	0	0.0001	0.0002	Q2KCE9	74.31						112.442
24769@20170914_03_MJLorite_iTRAQ.cmpd.rclb.mgf	85.22	578.818	4	0	0.0067	0	2	AETK	ASATTEAAADPAVVAVHDSLK	IFTD	MOD:01485 A1;MOD:01485 K21	0	1972	Q2K708	Q2K708{371-391}	0	0.0001	0.0002	Q2K708	86.51						81.6867
44235@20170914_03_MJLorite_iTRAQ.cmpd.rclb.mgf	142.33	1197.17	2	0	0.0024	0	2	REYK	VSFLAPLGLSTESEASAAGVAK	LIEQ	MOD:01485 V1;MOD:01485 K22	0	10479	Q2KBK4	Q2KBK4{205-226}	0	0.0001	0.0002	Q2KBK4	84.37						155.093
47910@20170914_03_MJLorite_iTRAQ.cmpd.rclb.mgf	153.1	754.752	3	1	-0.0025	0	2	LAER	AHGAAAVDLVTVLEENVGPVR	CAVR	MOD:01485 A1	0	7594	Q2K6P6	Q2K6P6{89-109}	0	0.0001	0.0002	Q2K6P6	74.49						125.73
54490@20170914_03_MJLorite_iTRAQ.cmpd.rclb.mgf	174.13	747.892	4	0	0.0055	0	2	HGKR	NAALIGAGIGALAGGAIGNYMDQQEAELR	AQLE	MOD:01485 N1	0	998	Q2K6F8	Q2K6F8{60-88}	0	0.0001	0.0002	Q2K6F8	154.57						112.893
39544@20170914_03_MJLorite_iTRAQ.cmpd.rclb.mgf	128.57	689.885	4	0	0.0028	0	2	SSLK	GVGYGTAAQPLPIVTGQDAEIPSVK	SIIA	MOD:01485 G1;MOD:01485 K25	0	5613	Q2K5F5	Q2K5F5{249-273}	0	0.0001	0.0002	Q2K5F5	93.23						91.3593
56429@20170914_03_MJLorite_iTRAQ.cmpd.rclb.mgf	180.48	1020.01	4	0	0.0234	1	2	GSGK	STLSYVLSGREDYEVTEGDILYNGESILELDPAER	AAKG	MOD:01485 S1	0	801	Q2K805	Q2K805{43-77}	0	0.0001	0.0002	Q2K805	64.12						118.265
54162@20170914_03_MJLorite_iTRAQ.cmpd.rclb.mgf	173.17	759.891	4	1	0.0207	0	2	KTSK	NHGAAYIASFPIPEVVMGINSFEQGAR	SVDP	MOD:01485 N1;MOD:00719 M17	0	10500	Q2K8G8	Q2K8G8{150-176}	0	0.0001	0.0002	Q2K8G8	70.91						73.2888
45706@20170914_03_MJLorite_iTRAQ.cmpd.rclb.mgf	146.67	437.246	4	0	-0.0006	0	2	GEVR	DAVEAALNLLDEGK	ARVA	MOD:01485 D1;MOD:01485 K14	0	6399	Q2KD46	Q2KD46{33-46}	0	0.0001	0.0002	Q2KD46	72.67						70.1087
17939@20170914_03_MJLorite_iTRAQ.cmpd.rclb.mgf	65.15	595.525	5	1	0.0058	1	2	SAPK	ADAAPAKAEAAPAAAPAPTAAPAAVSAGGNR	TFSS	MOD:01485 A1;MOD:01485 K7	0	4223	Q2K8W5	Q2K8W5{107-137}	0	0.0001	0.0002	Q2K8W5	60.53						48.8386
45223@20170914_03_MJLorite_iTRAQ.cmpd.rclb.mgf	145.23	952.473	3	0	-0.0132	0	2	VIQR	NILENPAWYTAYTPYQPEISQGR	LEAL	MOD:01485 N1	0	1202	Q2K813	Q2K813{105-127}	0	0.0001	0.0002	Q2K813	91.18						113.592
39472@20170914_03_MJLorite_iTRAQ.cmpd.rclb.mgf	128.37	581.552	4	0	0.0022	0	2	ITGK	AGGQIMGDWAQGEFALAGQK	AGTD	MOD:01485 A1;MOD:01485 K20	0	2233	Q2K7E8	Q2K7E8{257-276}	0	0.0001	0.0002	Q2K7E8	103.65						73.0108
45120@20170914_03_MJLorite_iTRAQ.cmpd.rclb.mgf	144.93	645.369	3	0	0.0012	0	2		TSILTNVAAMAALQTLR	GIND	MOD:01485 T1;MOD:00719 M10	0	5239	Q2KCE9	Q2KCE9{2-18}	0	0.0001	0.0002	Q2KCE9	79.52						105.221
34231@20170914_03_MJLorite_iTRAQ.cmpd.rclb.mgf	112.98	767.086	3	0	-0.0141	0	2	ILVK	VNQIGSLTETLDAVNTAHK	AAYT	MOD:01485 V1;MOD:01485 K19	0	10555	Q2K8W9	Q2K8W9{337-355}	0	0.0001	0.0002	Q2K8W9	67.94						103.105
47831@20170914_03_MJLorite_iTRAQ.cmpd.rclb.mgf	152.85	831.428	3	0	0.0105	0	2	DESK	TNYGYTVGAGVEAFVTNNITTR	LEYR	MOD:01485 Y3	0	5698	Q2KA52	Q2KA52{153-174}	0	0.0001	0.0002	Q2KA52	99.13						126.957
30966@20170914_03_MJLorite_iTRAQ.cmpd.rclb.mgf	103.4	1033.55	3	0	0.0045	0	2	GVFK	GNLDSGANIAPVAPATLPSANAATTTADTK	KFSM	MOD:01485 G1;MOD:01485 K30	0	1654	Q2KCE1	Q2KCE1{166-195}	0	0.0001	0.0002	Q2KCE1	70.39						137.149
58719@20170914_03_MJLorite_iTRAQ.cmpd.rclb.mgf	187.22	700.654	4	0	-0.0003	0	2	FKQK	GLTPLALGAIDTSGQHLLASLAYTK	ADDA	MOD:01485 G1;MOD:01485 K25	0	898	Q2K239	Q2K239{186-210}	0	0.0001	0.0002	Q2K239	84.92						118.567
52429@20170914_03_MJLorite_iTRAQ.cmpd.rclb.mgf	167.47	706.642	4	0	-0.0046	0	2	AVLK	NAIDLGEFLQKPVAFVGYGGVGGAR	AVEH	MOD:01485 N1;MOD:01485 K11	0	1059	Q2K339	Q2K339{94-118}	0	0.0001	0.0002	Q2K339	66.78						106.624
44418@20170914_03_MJLorite_iTRAQ.cmpd.rclb.mgf	142.88	599.088	4	0	0.0041	0	2	REYK	VSFLAPLGLSTESEASAAGVAK	LIEQ	MOD:01485 V1;MOD:01485 K22	0	10479	Q2KBK4	Q2KBK4{205-226}	0	0.0001	0.0002	Q2KBK4	79.53						81.9525
53387@20170914_03_MJLorite_iTRAQ.cmpd.rclb.mgf	170.88	846.696	4	0	0.0058	0	2	FTTR	TTDSNQLLASGTYINTSPTLVEINMTSLVR	KTQS	MOD:01485 T1	0	2636	Q2K4C6	Q2K4C6{61-90}	0	0.0001	0.0002	Q2K4C6	71.31						104.491
50926@20170914_03_MJLorite_iTRAQ.cmpd.rclb.mgf	161.97	720.895	4	0	0.004	0	2	NFGK	IATESGAELVGTDGFDQSIQLVLTK	RADA	MOD:01485 I1;MOD:01485 K25	0	4137	Q2K336	Q2K336{155-179}	0	0.0001	0.0002	Q2K336	86.13						94.0715
7596@20170914_03_MJLorite_iTRAQ.cmpd.rclb.mgf	34.78	646.36	2	0	-0.0004	0	2		SNSSVVIASAGR	TAVG	MOD:01485 S1	0	8991	Q2K324	Q2K324{2-13}	0	0.0001	0.0002	Q2K324	61.83						150.666
55766@20170914_03_MJLorite_iTRAQ.cmpd.rclb.mgf	177.88	584.593	4	0	0.004	0	2	TDAK	VDAVLSPYDGLSIGIISSLK	GVGY	MOD:01485 V1;MOD:01485 K20	0	5613	Q2K5F5	Q2K5F5{229-248}	0	0.0001	0.0002	Q2K5F5	88.22						73.7427
43241@20170914_03_MJLorite_iTRAQ.cmpd.rclb.mgf	139.42	918.815	3	0	-0.004	0	2	RGVR	GGSAVTPSSTNLALEPGDISPEELIR	SIGN	MOD:01485 G1	0	5998	Q2KBY4	Q2KBY4{339-364}	0	0.0001	0.0002	Q2KBY4	80.78						144.698
57222@20170914_03_MJLorite_iTRAQ.cmpd.rclb.mgf	182.82	755.64	4	0	0.0099	0	2	KTSK	NHGAAYIASFPIPEVVMGINSFEQGAR	SVDP	MOD:01485 N1	0	10500	Q2K8G8	Q2K8G8{150-176}	0	0.0001	0.0002	Q2K8G8	100.02						84.5219
54307@20170914_03_MJLorite_iTRAQ.cmpd.rclb.mgf	173.6	747.892	4	0	0.0056	0	2	HGKR	NAALIGAGIGALAGGAIGNYMDQQEAELR	AQLE	MOD:01485 N1	0	998	Q2K6F8	Q2K6F8{60-88}	0	0.0001	0.0002	Q2K6F8	136						105.64
55742@20170914_03_MJLorite_iTRAQ.cmpd.rclb.mgf	177.82	663.099	4	1	0.005	0	2	IAER	AYDAGSVMEPLTASGVHAALAAVFR	AASR	MOD:01485 A1	0	1640	Q2K5H9	Q2K5H9{25-49}	0	0.0001	0.0002	Q2K5H9	81.57						106.607
35533@20170914_03_MJLorite_iTRAQ.cmpd.rclb.mgf	116.8	645.349	3	0	0.0032	0	2		TSINTNNAAMAALQTLR	GINQ	MOD:01485 T1	0	5239	Q2KCF0	Q2KCF0{2-18}	0	0.0001	0.0002	Q2KCF0	95.38						108.904
53119@20170914_03_MJLorite_iTRAQ.cmpd.rclb.mgf	170.1	867.696	4	0	0.0051	1	2	AMQK	VGNEGVITVEEAKTAETELEVVEGMQFDR	GYLS	MOD:01485 V1;MOD:01485 K13	0	6161	Q2KAU2;Q2KBZ7	Q2KAU2{169-197};Q2KBZ7{169-197}	0	0.0001	0.0002	Q2KAU2;Q2KBZ7	59.85						132.684
52478@20170914_03_MJLorite_iTRAQ.cmpd.rclb.mgf	167.78	640.037	3	0	-0.0013	0	2		TSILTNVAAMAALQTLR	GIND	MOD:01485 T1	0	5239	Q2KCE9	Q2KCE9{2-18}	0	0.0001	0.0002	Q2KCE9	82.85						111.535
29105@20170914_03_MJLorite_iTRAQ.cmpd.rclb.mgf	97.93	742.384	3	0	0.0173	0	2	EWAR	AMQPSSALSNAAEWTSTGK	VVNT	MOD:01485 A1;MOD:01485 K19	0	10415	Q2KCE4	Q2KCE4{315-333}	0	0.0001	0.0002	Q2KCE4	59.7						109.027
50948@20170914_03_MJLorite_iTRAQ.cmpd.rclb.mgf	162.03	621.128	5	0	0.0042	0	2	NACR	ETIEAIETVLKPGHTFGDVFDMHAR	IMDE	MOD:01485 E1;MOD:01485 K11	0	9001	Q2K5U8	Q2K5U8{271-295}	0	0.0001	0.0002	Q2K5U8	71.37						73.7783
48766@20170914_03_MJLorite_iTRAQ.cmpd.rclb.mgf	155.6	572.301	4	0	-0.004	0	2	GAAK	VDTAYTAMDSAIDVVGEIK	AKLV	MOD:01485 V1;MOD:01485 K19	0	5239	Q2KCF1	Q2KCF1{74-92}	0	0.0001	0.0002	Q2KCF1	65.29						70.8587
43224@20170914_03_MJLorite_iTRAQ.cmpd.rclb.mgf	139.38	653.34	4	0	-0.0016	0	2	SLQK	LAVLPDETAVYFGHEYTLSNAR	FALT	MOD:01485 L1	0	8183	Q2K3M6	Q2K3M6{159-180}	0	0.0001	0.0002	Q2K3M6	68.93						65.0151
55496@20170914_03_MJLorite_iTRAQ.cmpd.rclb.mgf	177.1	581.089	4	0	-0.0076	0	2	SGMR	GYVLGISGGVDSLTAALLAQK	AVRE	MOD:01485 Y2;MOD:01485 K21	0	6900	Q2KAY6	Q2KAY6{45-65}	0	0.0001	0.0002	Q2KAY6	71.23						70.4659
39883@20170914_03_MJLorite_iTRAQ.cmpd.rclb.mgf	129.55	919.504	3	0	-0.0179	0	2	SSLK	GVGYGTAAQPLPIVTGQDAEIPSVK	SIIA	MOD:01485 G1;MOD:01485 K25	0	5613	Q2K5F5	Q2K5F5{249-273}	0	0.0001	0.0002	Q2K5F5	66.44						137.151
48291@20170914_03_MJLorite_iTRAQ.cmpd.rclb.mgf	154.2	687.383	4	0	0.0048	0	2	HLER	IIGETGVVPVINQIELHPDFQQR	AAQE	MOD:01485 I1	0	8377	Q2K375	Q2K375{175-197}	0	0.0001	0.0002	Q2K375	73.78						79.1848
61635@20170914_03_MJLorite_iTRAQ.cmpd.rclb.mgf	195.93	841.81	3	0	-0.0096	0	2	VPMR	VTPEEIDAAIEAVPAEVLGALK	LAAL	MOD:01485 V1;MOD:01485 K22	0	7186	Q2KCN8	Q2KCN8{68-89}	0	0.0001	0.0002	Q2KCN8	68.49						116.077
35766@20170914_03_MJLorite_iTRAQ.cmpd.rclb.mgf	117.47	975.512	2	0	-0.0083	0	2		TSINTNNAAMAALQTLR	GINQ	MOD:01485 T1;MOD:00719 M10	0	5239	Q2KCF0	Q2KCF0{2-18}	0	0.0001	0.0002	Q2KCF0	84.99						140.282
57903@20170914_03_MJLorite_iTRAQ.cmpd.rclb.mgf	184.83	475.759	4	0	0.0047	0	2	HEYR	LLAYLMHHMGEVVSR	TELV	MOD:01485 L1	0	6982	Q2KAP5	Q2KAP5{157-171}	0	0.0001	0.0002	Q2KAP5	63.68						87.8225
62998@20170914_03_MJLorite_iTRAQ.cmpd.rclb.mgf	200.27	731.392	4	0	0.005	0	2	LTVK	FTLNHPEAPFLADLAMDFASIVSK	EYAD	MOD:01485 F1;MOD:01485 K24	0	474	Q2KC86	Q2KC86{161-184}	0	0.0001	0.0002	Q2KC86	74.08						66.0661
44840@20170914_03_MJLorite_iTRAQ.cmpd.rclb.mgf	144.12	596.841	4	0	-0.0054	0	2	VEVR	KPEVDATLVAQSIAQQLER	RVAF	MOD:01485 K1;MOD:01485 K1	0	2418	Q2K9L0	Q2K9L0{108-126}	0	0.0001	0.0002	Q2K9L0	71.65						52.6335
52436@20170914_03_MJLorite_iTRAQ.cmpd.rclb.mgf	167.52	640.037	3	0	-0.0013	0	2		TSILTNVAAMAALQTLR	GIND	MOD:01485 T1	0	5239	Q2KCE9	Q2KCE9{2-18}	0	0.0001	0.0002	Q2KCE9	84.56						113.79
59225@20170914_03_MJLorite_iTRAQ.cmpd.rclb.mgf	188.7	596.332	4	0	-0.0036	0	2	IATR	VMQQAFDYLDAPILTIAGK	DVPM	MOD:01485 V1;MOD:01485 K19	0	1883	Q2K8W6	Q2K8W6{415-433}	0	0.0001	0.0002	Q2K8W6	96.5						77.3168
53077@20170914_03_MJLorite_iTRAQ.cmpd.rclb.mgf	169.98	705.882	4	0	0.0086	0	2	EGQR	YDFGPVTVQSTVEGVGSDQLLPLVR	TKEG	MOD:01485 Y1	0	2957	Q2K8Y0	Q2K8Y0{278-302}	0	0.0001	0.0002	Q2K8Y0	75.57						78.5889
45649@20170914_03_MJLorite_iTRAQ.cmpd.rclb.mgf	146.5	615.318	4	0	-0.0009	0	2	DKFK	ADFANAGATQFGSGWAWVSVK	NGKL	MOD:01485 A1;MOD:01485 K21	0	3834	Q2KAX8	Q2KAX8{113-133}	0	0.0001	0.0002	Q2KAX8	64.99						79.837
45933@20170914_03_MJLorite_iTRAQ.cmpd.rclb.mgf	147.32	692.389	3	0	0.0003	0	2	TDLR	ASVSLVIAGLAAEGETTVSR	VYHL	MOD:01485 A1	0	5525	Q2KCP0	Q2KCP0{384-403}	0	0.0001	0.0002	Q2KCP0	63.67						112.678
59097@20170914_03_MJLorite_iTRAQ.cmpd.rclb.mgf	188.32	913.121	3	0	0.0092	0	2	FHVK	ADGSFTYDLTADLDAGVTYTEVLR	YYKI	MOD:01485 A1	0	201	Q2K1Q3	Q2K1Q3{184-207}	0	0.0001	0.0002	Q2K1Q3	62.6						95.4939
33946@20170914_03_MJLorite_iTRAQ.cmpd.rclb.mgf	112.15	609.317	4	0	0.0025	0	2	SYTR	TNIEIHDNTFDDLSEAALK	VDRP	MOD:01485 T1;MOD:01485 K19	0	1972	Q2K708	Q2K708{298-316}	0	0.0001	0.0002	Q2K708	63.57						71.8358
61071@20170914_03_MJLorite_iTRAQ.cmpd.rclb.mgf	194.15	676.128	4	0	0.0054	0	2	AQAR	SVIDGLDADVVTLALEGDIDAIAK	KTGK	MOD:01485 S1;MOD:01485 K24	0	5704	Q2K0P9	Q2K0P9{79-102}	0	0.0001	0.0002	Q2K0P9	84.6						116.925
29690@20170914_03_MJLorite_iTRAQ.cmpd.rclb.mgf	99.67	650.681	3	0	0.0041	0	2		TSINTNNAAMAALQTLR	GINQ	MOD:01485 T1;MOD:00719 M10	0	5239	Q2KCF0	Q2KCF0{2-18}	0	0.0001	0.0002	Q2KCF0	79.8						110.206
38943@20170914_03_MJLorite_iTRAQ.cmpd.rclb.mgf	126.77	879.46	3	0	0.0015	0	2	DESK	TNYGYTVGAGVEAFVTNNITTR	LEYR	MOD:01485 T1;MOD:01485 Y5	0	5698	Q2KA52	Q2KA52{153-174}	0	0.0001	0.0002	Q2KA52	71.46						141.728
40424@20170914_03_MJLorite_iTRAQ.cmpd.rclb.mgf	131.15	968.497	3	0	0.0224	0	2	PITK	ADGSEGAATGATLTDAQIVAMDWHVK	GVTT	MOD:01485 A1;MOD:01485 K26	0	3307	Q2K1D3	Q2K1D3{333-358}	0	0.0001	0.0002	Q2K1D3	106.27						125.997
56701@20170914_03_MJLorite_iTRAQ.cmpd.rclb.mgf	181.28	968.258	4	0	0.0095	0	2	DTVR	TTLASYTLGSDLENLTYSGTVAFTGTGNSLANTIK	GGAG	MOD:01485 T1;MOD:01485 K35	0	6947	Q2KC97	Q2KC97{546-580,1149-1183}	0	0.0001	0.0002	Q2KC97	117.67						122.893
58071@20170914_03_MJLorite_iTRAQ.cmpd.rclb.mgf	185.32	831.763	3	1	0.014	0	2	DESK	TNYGYTVGAGVEAFVTNNITTR	LEYR	MOD:01485 T1	0	5698	Q2KA52	Q2KA52{153-174}	0	0.0001	0.0002	Q2KA52	60.68						123.309
43574@20170914_03_MJLorite_iTRAQ.cmpd.rclb.mgf	140.4	1023	4	0	0.0053	0	2		ASPIHATDDSATFQETDVISGNLLSNDSSDNGHLFLR	AFDG	MOD:01485 A1	0	201	Q2K1Q3	Q2K1Q3{2-38}	0	0.0001	0.0002	Q2K1Q3	69.28						126.939
35906@20170914_03_MJLorite_iTRAQ.cmpd.rclb.mgf	117.88	645.349	3	0	0.0032	0	2		TSINTNNAAMAALQTLR	GINQ	MOD:01485 T1	0	5239	Q2KCF0	Q2KCF0{2-18}	0	0.0001	0.0002	Q2KCF0	74.88						109.841
55339@20170914_03_MJLorite_iTRAQ.cmpd.rclb.mgf	176.62	945.976	4	0	0.0082	0	2		AIHATDDTATFLETDVISGNLLSNDTSDGNLFLR	AFDQ	MOD:01485 A1	0	5138	Q2K591	Q2K591{2-35}	0	0.0001	0.0002	Q2K591	83.1						141.406
36490@20170914_03_MJLorite_iTRAQ.cmpd.rclb.mgf	119.6	545.101	5	0	0.0057	0	2	DNKK	LSIGVDSNQNHLHPGSVLTSMVK	RVDL	MOD:01485 L1;MOD:01485 K23	0	2076	Q2KDS5	Q2KDS5{231-253}	0	0.0001	0.0002	Q2KDS5	73.93						73.7301
63615@20170914_03_MJLorite_iTRAQ.cmpd.rclb.mgf	202.67	602.126	4	0	-0.0023	0	2	LIAR	LHQAGAISVVAADILALTLLK	SPGE	MOD:01485 L1;MOD:01485 K21	0	1202	Q2K813	Q2K813{239-259}	0	0.0001	0.0002	Q2K813	63.73						75.3557
63513@20170914_03_MJLorite_iTRAQ.cmpd.rclb.mgf	202.18	906.217	4	0	0.0036	0	2	RLIR	DSANVDYYATFDNFQVGVLQANSIVDGLGLK	DGKG	MOD:01485 D1;MOD:01485 K31	0	5613	Q2K5F5	Q2K5F5{120-150}	0	0.0001	0.0002	Q2K5F5	93.05						116.424
32316@20170914_03_MJLorite_iTRAQ.cmpd.rclb.mgf	107.35	1038.58	2	0	0.0073	0	2		AEITDPENTIILETTK	GKVV	MOD:01485 A1;MOD:01485 K16	0	2976	Q2K8D7	Q2K8D7{2-17}	0	0.0001	0.0002	Q2K8D7	114.78						169.856
25480@20170914_03_MJLorite_iTRAQ.cmpd.rclb.mgf	87.3	420.244	4	0	-0.0018	0	2	YRAR	AAALSMIPTSTGAAK	AVGL	MOD:01485 A1;MOD:01485 K15	0	9080	Q2K4I4	Q2K4I4{202-216}	0	0.0001	0.0002	Q2K4I4	77.82						54.3514
50652@20170914_03_MJLorite_iTRAQ.cmpd.rclb.mgf	161.17	661.344	4	0	0.0013	0	2	GFLK	DASLTDPSLVESDFAEAGLAFAK	DADG	MOD:01485 D1;MOD:01485 K23	0	376	Q2JZJ7	Q2JZJ7{126-148}	0	0.0001	0.0002	Q2JZJ7	114.76						88.4217
31962@20170914_03_MJLorite_iTRAQ.cmpd.rclb.mgf	106.32	545.016	4	0	0.0022	0	2	TGYK	GFDWGAWHDGDDAAIQK	EADG	MOD:01485 G1;MOD:01485 K17	0	3114	Q2K4M9	Q2K4M9{148-164}	0	0.0001	0.0002	Q2K4M9	86.34						66.7068
47988@20170914_03_MJLorite_iTRAQ.cmpd.rclb.mgf	153.33	588.307	4	0	-0.0013	0	2	ISTR	IELQENFVGALSDSIDSGVGR	LVDA	MOD:01485 I1	0	5239	Q2KCE9	Q2KCE9{240-260}	0	0.0001	0.0002	Q2KCE9	83.07						72.7306
58773@20170914_03_MJLorite_iTRAQ.cmpd.rclb.mgf	187.38	562.845	4	1	-0.0194	0	2	KILR	VLAPLGVLLPNGLGLNVDGK	DIGR	MOD:01485 V1;MOD:01485 K20	0	2314	Q2KBM4	Q2KBM4{181-200}	0	0.0001	0.0002	Q2KBM4	58.74						75.2134
30975@20170914_03_MJLorite_iTRAQ.cmpd.rclb.mgf	103.43	548.056	4	0	0.0115	0	2	TELK	ADHFAAGQLVDVTGTTIGK	GFAG	MOD:01485 A1;MOD:01485 K19	0	8971	Q2K9L6	Q2K9L6{99-117}	0	0.0001	0.0002	Q2K9L6	73.05						64.0516
46988@20170914_03_MJLorite_iTRAQ.cmpd.rclb.mgf	150.4	839.675	4	0	0.0001	1	2	QKLR	GLVSQQMTMMGTWLQTEQTDKDLAQAR	REKF	MOD:01485 G1;MOD:01485 K21	0	478	Q2K2Q6	Q2K2Q6{219-245}	0	0.0001	0.0002	Q2K2Q6	62.04						115.355
60644@20170914_03_MJLorite_iTRAQ.cmpd.rclb.mgf	192.88	1039.8	4	0	0.0068	0	2	QGLK	ATLVSGDGIVSNELASIAGDAVAGTLNTFGPDPTLNPANK	ELVE	MOD:01485 A1;MOD:01485 K40	0	3055	Q2K502	Q2K502{242-281}	0	0.0001	0.0002	Q2K502	88.05						129.22
31412@20170914_03_MJLorite_iTRAQ.cmpd.rclb.mgf	104.72	751.368	4	0	0.0125	0	2	DAAK	AMVDQGVDVLTQHTDTTAPMQVAEER	GIHA	MOD:01485 A1;MOD:00719 M2	0	10500	Q2K8G8	Q2K8G8{204-229}	0	0.0001	0.0002	Q2K8G8	75.59						110.621
64789@20170914_03_MJLorite_iTRAQ.cmpd.rclb.mgf	209.28	906.217	4	0	0.0033	0	2	RLIR	DSANVDYYATFDNFQVGVLQANSIVDGLGLK	DGKG	MOD:01485 D1;MOD:01485 K31	0	5613	Q2K5F5	Q2K5F5{120-150}	0	0.0001	0.0002	Q2K5F5	89.13						125.929
31802@20170914_03_MJLorite_iTRAQ.cmpd.rclb.mgf	105.85	772.395	4	0	0.0075	0	2	LFLR	QFGNTSVNGDPTATTNIAGTYGTFHVK	ADGS	MOD:01485 Q1;MOD:01485 K27	0	5138	Q2K591	Q2K591{154-180}	0	0.0001	0.0002	Q2K591	103.46						94.2548
55027@20170914_03_MJLorite_iTRAQ.cmpd.rclb.mgf	175.72	701.636	4	0	0.003	0	2	NLRR	SIALSVEDGVVATYIHNAVSDGLGK	LGVL	MOD:01485 S1;MOD:01485 K25	0	6902	Q2K8Y6	Q2K8Y6{142-166}	0	0.0001	0.0002	Q2K8Y6	101.73						120.031
55390@20170914_03_MJLorite_iTRAQ.cmpd.rclb.mgf	176.78	748.161	4	0	0.0056	0	2	GAVR	ASESVGIPATNIIGVGIGGAESAINEFK	KPAA	MOD:01485 A1;MOD:01485 K28	0	4310	Q2K3Y6	Q2K3Y6{238-265}	0	0.0001	0.0002	Q2K3Y6	75.57						107.851
39677@20170914_03_MJLorite_iTRAQ.cmpd.rclb.mgf	128.97	527.277	4	0	0.0012	0	2	AANK	TGVGVFGLSFYENNADK	LKVA	MOD:01485 T1;MOD:01485 K17	0	7138	Q2KCV8	Q2KCV8{241-257}	0	0.0001	0.0002	Q2KCV8	59.85						71.9429
32715@20170914_03_MJLorite_iTRAQ.cmpd.rclb.mgf	108.53	562.558	4	0	0.0023	0	2	RMSK	GTNVQDWNQATNLVITGK	AGGQ	MOD:01485 G1;MOD:01485 K18	0	2233	Q2K7E8	Q2K7E8{239-256}	0	0.0001	0.0002	Q2K7E8	66.74						65.4256
30424@20170914_03_MJLorite_iTRAQ.cmpd.rclb.mgf	101.82	817.077	3	1	0.0192	0	2	FLTK	QVDANNGAVTDVQGTYGTFHVK	ADGS	MOD:00040 Q1;MOD:01485 K22	0	201	Q2K1Q3	Q2K1Q3{162-183}	0	0.0001	0.0002	Q2K1Q3	79.51						101.517
31332@20170914_03_MJLorite_iTRAQ.cmpd.rclb.mgf	104.48	510.682	5	0	-0.0021	1	2	TLGR	IMNVIGEPVDEAGPLNTAHKR	AIHQ	MOD:01485 I1;MOD:01485 K20	0	8381	Q2K3H0	Q2K3H0{93-113}	0	0.0001	0.0002	Q2K3H0	80.1						43.0793
61588@20170914_03_MJLorite_iTRAQ.cmpd.rclb.mgf	195.8	1145.3	3	0	0.0087	1	2	ESSK	LSALQTQQQLAVQSLSIANSSSQTILSLFRG		MOD:01485 L1	0	5239	Q2KCF0	Q2KCF0{272-302}	0	0.0001	0.0002	Q2KCF0	58.7						134.399
53337@20170914_03_MJLorite_iTRAQ.cmpd.rclb.mgf	170.75	600.589	4	0	0.0085	0	2	AKMK	EAGVSIIYWGGLHTEAGLIIR	QAAD	MOD:01485 E1	0	3055	Q2K502	Q2K502{213-233}	0	0.0001	0.0002	Q2K502	59.06						70.0226
45901@20170914_03_MJLorite_iTRAQ.cmpd.rclb.mgf	147.23	736.051	3	0	0.0022	0	2	IEAK	QTDAIVTDVLDSSISNDLR	KKYL	MOD:01485 Q1	0	1713	Q2K589	Q2K589{296-314}	0	0.0001	0.0002	Q2K589	80.46						124.424
14736@20170914_03_MJLorite_iTRAQ.cmpd.rclb.mgf	55.75	795.9	2	0	0.0001	0	2		TIYYVNSATGSDR	NGGT	MOD:01485 T1	0	1972	Q2K708	Q2K708{2-14}	0	0.0001	0.0002	Q2K708	59.13						155.549
6339@20170914_03_MJLorite_iTRAQ.cmpd.rclb.mgf	31.13	365.2	4	0	0.001	0	2		ASTNFRPLHDR	VVVR	MOD:01485 A1	0	2834	Q2KBZ6	Q2KBZ6{2-12}	0	0.0001	0.0002	Q2KBZ6	71.17						51.1214
42953@20170914_03_MJLorite_iTRAQ.cmpd.rclb.mgf	138.58	643.331	4	0	0.0058	0	2	NIEK	GFDASLAGTGSSDLPDIPAEFSK	TPFV	MOD:01485 G1;MOD:01485 K23	0	7659	Q2K8D8	Q2K8D8{91-113}	0	0.0001	0.0002	Q2K8D8	99.9						84.8703
43640@20170914_03_MJLorite_iTRAQ.cmpd.rclb.mgf	140.6	601.086	4	0	-0.0009	1	2	MTAR	NLFLLPGDGIGPEAMGEVRK	IIAY	MOD:01485 N1;MOD:01485 K20	0	2899	Q2K2V0	Q2K2V0{5-24}	0	0.0001	0.0002	Q2K2V0	84.57						52.8742
21157@20170914_03_MJLorite_iTRAQ.cmpd.rclb.mgf	74.62	430.501	4	0	0.0024	0	2	PSVK	SIIAGEQHSTIFK	DTRE	MOD:01485 S1;MOD:01485 K13	0	5613	Q2K5F5	Q2K5F5{274-286}	0	0.0001	0.0002	Q2K5F5	70.12						86.3093
59751@20170914_03_MJLorite_iTRAQ.cmpd.rclb.mgf	190.28	702.599	4	0	0.0093	0	2	LAAR	TFNAGFNTVEFTSSALVDMAFHTR	EAVE	MOD:01485 T1	0	7004	Q2K3C4	Q2K3C4{549-572}	0	0.0001	0.0002	Q2K3C4	94.82						82.0735
44747@20170914_03_MJLorite_iTRAQ.cmpd.rclb.mgf	143.85	518.277	4	0	0.0022	0	2	KDER	DFAAQVDAVENFVTQK	YDII	MOD:01485 D1;MOD:01485 K16	0	3790	Q2KCK8	Q2KCK8{89-104}	0	0.0001	0.0002	Q2KCK8	78.5						60.5065
37256@20170914_03_MJLorite_iTRAQ.cmpd.rclb.mgf	121.83	655.586	4	0	0.0017	0	2	EMWK	TLNANDALGHYPDWSSPTMLK	TIDD	MOD:01485 T1;MOD:01485 K21	0	6614	Q2K9X9	Q2K9X9{390-410}	0	0.0001	0.0002	Q2K9X9	66.19						89.7436
64733@20170914_03_MJLorite_iTRAQ.cmpd.rclb.mgf	207.68	906.215	4	0	-0.0028	0	2	RLIR	DSANVDYYATFDNFQVGVLQANSIVDGLGLK	DGKG	MOD:01485 D1;MOD:01485 K31	0	5613	Q2K5F5	Q2K5F5{120-150}	0	0.0001	0.0002	Q2K5F5	82.93						125.887
37977@20170914_03_MJLorite_iTRAQ.cmpd.rclb.mgf	123.95	678.129	4	0	0.0018	0	2	LLQK	DPSINVIHTINEPAAVGAYQALK	AVGM	MOD:01485 D1;MOD:01485 K23	0	5517	Q2KD00	Q2KD00{222-244}	0	0.0001	0.0002	Q2KD00	73.44						92.5836
54852@20170914_03_MJLorite_iTRAQ.cmpd.rclb.mgf	175.2	782.89	4	1	0.0193	1	2	YYKK	YFAEAADEKTYQTLDEAFQDLASGR	IDYV	MOD:01485 Y1;MOD:01485 Y11	0	876	Q2K1K6	Q2K1K6{148-172}	0	0.0001	0.0002	Q2K1K6	58.73						122.27
36757@20170914_03_MJLorite_iTRAQ.cmpd.rclb.mgf	120.4	511.278	4	0	0.001	0	2	GKVK	IGILNDQSGVYADFGGK	SSVE	MOD:01485 I1;MOD:01485 K17	0	8393	Q2K0R6	Q2K0R6{31-47}	0	0.0001	0.0002	Q2K0R6	91.98						67.8858
55101@20170914_03_MJLorite_iTRAQ.cmpd.rclb.mgf	175.92	852.948	4	0	0.0049	0	2	DWTK	ATITLEGAYAPWNLTNADGTLGGFEPELAK	VLCE	MOD:01485 A1;MOD:01485 K30	0	1971	Q2K072	Q2K072{29-58}	0	0.0001	0.0002	Q2K072	94.69						128.148
44988@20170914_03_MJLorite_iTRAQ.cmpd.rclb.mgf	144.55	555.54	4	0	0.0012	0	2	ADVK	SLVWYVPENFEEAGYK	IPTT	MOD:01485 S1;MOD:01485 K16	0	4702	Q2KCC4	Q2KCC4{172-187}	0	0.0001	0.0002	Q2KCC4	58.7						65.6787
34126@20170914_03_MJLorite_iTRAQ.cmpd.rclb.mgf	112.68	589.072	4	0	0.0141	0	2	GLVR	GQQVIDTGAPISVPVGDETLGR	IMNV	MOD:01485 G1	0	8381	Q2K3H0	Q2K3H0{71-92}	0	0.0001	0.0002	Q2K3H0	61.14						73.9055
34585@20170914_03_MJLorite_iTRAQ.cmpd.rclb.mgf	114.02	616.841	4	0	-0.0067	0	2	DYLR	QALAGIGIDAEIVNADAAAHQK	AVYT	MOD:01485 Q1;MOD:01485 K22	0	10010	Q2K249	Q2K249{395-416}	0	0.0001	0.0002	Q2K249	61.27						84.5736
21382@20170914_03_MJLorite_iTRAQ.cmpd.rclb.mgf	75.27	549.803	4	0	0.0059	0	2	NGQR	IPQPANPDGPATTTTIEGK	YGTL	MOD:01485 I1;MOD:01485 K19	0	3114	Q2K4M9	Q2K4M9{48-66}	0	0.0001	0.0002	Q2K4M9	73.68						62.7258
33932@20170914_03_MJLorite_iTRAQ.cmpd.rclb.mgf	112.1	765.627	4	0	0.0073	0	2	GNAR	DYDISGNHIHDGAWGVAVSGPIGASYTR	TNIE	MOD:01485 D1	0	1972	Q2K708	Q2K708{270-297}	0	0.0001	0.0002	Q2K708	107.4						107.249
51621@20170914_03_MJLorite_iTRAQ.cmpd.rclb.mgf	164.12	592.005	3	0	0.0084	0	2		TSILTNVAAMAALQTLR	GIND		0	5239	Q2KCE9	Q2KCE9{2-18}	0	0.0001	0.0002	Q2KCE9	87.5						67.4958
45934@20170914_03_MJLorite_iTRAQ.cmpd.rclb.mgf	147.32	709.386	4	0	0.0102	0	2	EKAK	IELSSSQQTEINLPFITADASGPK	HLTL	MOD:01485 I1;MOD:01485 K24	0	7691	Q2KDW6	Q2KDW6{266-289}	0	0.0001	0.0002	Q2KDW6	67.95						100.289
48261@20170914_03_MJLorite_iTRAQ.cmpd.rclb.mgf	154.12	638.34	4	0	0.0049	1	2	SISK	RIELQENFVSALSDSIDSGIGR	LVDA	MOD:01485 R1	0	5239	Q2KCF0	Q2KCF0{238-259}	0	0.0001	0.0002	Q2KCF0	82.57						64.7687
41352@20170914_03_MJLorite_iTRAQ.cmpd.rclb.mgf	133.87	879.952	2	1	-0.0124	0	2	TGSK	LDPNDTDAILEELR	MNGG	MOD:01485 L1	0	7410	Q2K686	Q2K686{231-244}	0	0.0001	0.0002	Q2K686	70.44						148.829
59008@20170914_03_MJLorite_iTRAQ.cmpd.rclb.mgf	188.07	924.985	2	0	0.0034	0	2	DGCR	QVGTVEMGEAILAEFK	ALSA	MOD:00040 Q1;MOD:01485 K16	0	2899	Q2K2V0	Q2K2V0{351-366}	0	0.0001	0.0002	Q2K2V0	72.94						112.75
57786@20170914_03_MJLorite_iTRAQ.cmpd.rclb.mgf	184.48	651.109	4	0	0.0042	0	2	VRGR	VGYDMNPFLLYGTAGLALGNVK	VSDG	MOD:01485 V1;MOD:01485 K22	0	5698	Q2KA52	Q2KA52{121-142}	0	0.0001	0.0002	Q2KA52	80.68						79.4805
46247@20170914_03_MJLorite_iTRAQ.cmpd.rclb.mgf	148.23	511.785	4	0	0.008	0	2	GYDR	LIENPAAFYITFDNK	EVGR	MOD:01485 L1;MOD:01485 K15	0	10540	Q2K5E8	Q2K5E8{115-129}	0	0.0001	0.0002	Q2K5E8	72.64						61.8223
49066@20170914_03_MJLorite_iTRAQ.cmpd.rclb.mgf	156.48	638.34	4	0	0.0022	1	2	SISK	RIELQENFVSALSDSIDSGIGR	LVDA	MOD:01485 R1	0	5239	Q2KCF0	Q2KCF0{238-259}	0	0.0001	0.0002	Q2KCF0	59.79						63.7641
26727@20170914_03_MJLorite_iTRAQ.cmpd.rclb.mgf	90.97	649.331	3	0	-0.0001	0	2	RVEK	ASDNAAYWSIATTMR	SDNK	MOD:01485 A1;MOD:01485 Y7	0	5239	Q2KCE9;Q2KCF1	Q2KCE9{40-54};Q2KCF1{40-54}	0	0.0001	0.0002	Q2KCE9;Q2KCF1	74.06						99.1359
41390@20170914_03_MJLorite_iTRAQ.cmpd.rclb.mgf	134	593.07	4	0	0.006	0	2	LVDK	AIGEAGDYDSVSVILQTASGK	QAVI	MOD:01485 A1;MOD:01485 K21	0	2880	Q2K5F0	Q2K5F0{201-221}	0	0.0001	0.0002	Q2K5F0	90.9						89.4106
55878@20170914_03_MJLorite_iTRAQ.cmpd.rclb.mgf	178.25	710.368	4	0	0.0021	0	2	EKFK	AAGFNPEAYTLYSYAAMQAIAGAAK	AAGS	MOD:01485 A1;MOD:01485 K25	0	3055	Q2K502	Q2K502{289-313}	0	0.0001	0.0002	Q2K502	91.18						89.5956
34832@20170914_03_MJLorite_iTRAQ.cmpd.rclb.mgf	114.73	837.676	4	0	0.0078	1	2	DLGR	QQVQAEFGDKIETPYLENVPEGPDAER	AIER	MOD:01485 Q1;MOD:01485 Y15	0	10500	Q2K8G8	Q2K8G8{52-78}	0	0.0001	0.0002	Q2K8G8	69.11						114.153
34192@20170914_03_MJLorite_iTRAQ.cmpd.rclb.mgf	112.87	625.586	4	0	0.0026	0	2	IQVR	LGEHNIDVLEGNEQFINAAK	IITH	MOD:01485 L1;MOD:01485 K20	0	450	P00761	P00761{58-77}	0	0.0001	0.0002	P00761	69.04						60.6488
31807@20170914_03_MJLorite_iTRAQ.cmpd.rclb.mgf	105.87	462.275	4	1	0.0013	0	2	SGAK	VIGLANAGLDTSNAIK	QAAE	MOD:01485 V1;MOD:01485 K16	0	8393	Q2K0R6	Q2K0R6{222-237}	0	0.0001	0.0002	Q2K0R6	84.53						58.4683
58261@20170914_03_MJLorite_iTRAQ.cmpd.rclb.mgf	185.87	1016.27	4	1	-0.0117	0	2	KKLK	IYSADVSTADIQEITEEGSPWVATVATNPAVVGAVSIR	AAAL	MOD:01485 Y2	0	3902	Q2K245	Q2K245{250-287}	0	0.0001	0.0002	Q2K245	58.96						87.8159
57335@20170914_03_MJLorite_iTRAQ.cmpd.rclb.mgf	183.15	610.103	4	0	-0.0001	0	2	MKK	ALITGVTGQDGSYLAELLLSK	GYEV	MOD:01485 A1;MOD:01485 K21	0	9052	Q2KC60	Q2KC60{4-24}	0	0.0001	0.0002	Q2KC60	82.96						90.7847
24520@20170914_03_MJLorite_iTRAQ.cmpd.rclb.mgf	84.48	480.765	4	0	0.0074	0	2		TSINTNSSAQAALQTLR	NVNQ	MOD:01485 T1	0	5239	Q2KCF1	Q2KCF1{2-18}	0	0.0001	0.0002	Q2KCF1	67.06						60.7978
45768@20170914_03_MJLorite_iTRAQ.cmpd.rclb.mgf	146.85	549.801	4	0	-0.0058	0	2	TEIR	VPTLGESVSEATVGTWFK	KVGD	MOD:01485 V1;MOD:01485 K18	0	8114	Q2K3F3	Q2K3F3{7-24}	0	0.0001	0.0002	Q2K3F3	58.54						55.3562
59478@20170914_03_MJLorite_iTRAQ.cmpd.rclb.mgf	189.43	867.51	3	0	0.0034	0	2	ANPK	LVGVFASNLILAQGVGQAIAENK	LGDK	MOD:01485 L1;MOD:01485 K23	0	8759	Q2KCX3	Q2KCX3{224-246}	0	0.0001	0.0002	Q2KCX3	66.41						132.519
49866@20170914_03_MJLorite_iTRAQ.cmpd.rclb.mgf	158.85	561.319	5	0	-0.0016	1	2	LIAK	MKEAGVSIIYWGGLHTEAGLIIR	QAAD	MOD:01485 M1;MOD:01485 K2	0	3055	Q2K502	Q2K502{211-233}	0	0.0001	0.0002	Q2K502	62.56						67.211
58147@20170914_03_MJLorite_iTRAQ.cmpd.rclb.mgf	185.55	704.623	4	0	0.0031	0	2	LPDR	GSAGAALEADEIQLAAFSAVPLADLDR	ISKV	MOD:01485 G1	0	10010	Q2K249	Q2K249{241-267}	0	0.0001	0.0002	Q2K249	65.43						94.3726
38187@20170914_03_MJLorite_iTRAQ.cmpd.rclb.mgf	124.55	678.129	4	0	0.0018	0	2	LLQK	DPSINVIHTINEPAAVGAYQALK	AVGM	MOD:01485 D1;MOD:01485 K23	0	5517	Q2KD00	Q2KD00{222-244}	0	0.0001	0.0002	Q2KD00	89.47						93.9991
43764@20170914_03_MJLorite_iTRAQ.cmpd.rclb.mgf	140.97	666.629	4	0	0.0015	0	2	GEQK	VSNTAGGAALGALGGALVGVAVGGGGHGK	RNAA	MOD:01485 V1;MOD:01485 K29	0	998	Q2K6F8	Q2K6F8{30-58}	0	0.0001	0.0002	Q2K6F8	88.92						120.57
42694@20170914_03_MJLorite_iTRAQ.cmpd.rclb.mgf	137.82	775.404	4	0	0.0038	1	2	DYFK	ANNLQYNPVVFEKLDEVNAAYDAGR	CDVY	MOD:01485 A1;MOD:01485 K13	0	6573	Q2K902	Q2K902{173-197}	0	0.0001	0.0002	Q2K902	71.32						91.3044
32419@20170914_03_MJLorite_iTRAQ.cmpd.rclb.mgf	107.65	664.58	4	0	0.014	0	2	NQLR	SIVDQGQSISFSMGNADDVLQQR	FQSY	MOD:01485 S1;MOD:00719 M13	0	478	Q2K2Q6	Q2K2Q6{108-130}	0	0.0001	0.0002	Q2K2Q6	101.41						84.5649
49890@20170914_03_MJLorite_iTRAQ.cmpd.rclb.mgf	158.92	831.424	3	0	-0.0012	0	2	DESK	TNYGYTVGAGVEAFVTNNITTR	LEYR	MOD:01485 T1	0	5698	Q2KA52	Q2KA52{153-174}	0	0.0001	0.0002	Q2KA52	80.68						130.135
56644@20170914_03_MJLorite_iTRAQ.cmpd.rclb.mgf	181.12	638.621	4	0	0.0029	0	2	KTGR	SIAGNALAIGGLAAIAGLGYQAYK	NYQA	MOD:01485 S1;MOD:01485 K24	0	2196	Q2K447	Q2K447{56-79}	0	0.0001	0.0002	Q2K447	62.77						92.2754
25723@20170914_03_MJLorite_iTRAQ.cmpd.rclb.mgf	88.02	526.285	4	0	0.0065	1	2	TELK	LYPTADEYKLDVSSGR	VDAV	MOD:01485 Y2;MOD:01485 K9	0	3015	Q2K7J0	Q2K7J0{160-175}	0	0.0001	0.0002	Q2K7J0	58.66						66.2204
47719@20170914_03_MJLorite_iTRAQ.cmpd.rclb.mgf	152.53	572.303	4	0	0.0009	0	2	GAAK	VDTAYTAMDSAIDVVGEIK	AKLV	MOD:01485 V1;MOD:01485 K19	0	5239	Q2KCF1	Q2KCF1{74-92}	0	0.0001	0.0002	Q2KCF1	62.73						72.4311
34686@20170914_03_MJLorite_iTRAQ.cmpd.rclb.mgf	114.3	895.471	2	0	0.0103	0	2		TSINTNNAAMAALQTLR	GINQ		0	5239	Q2KCF0	Q2KCF0{2-18}	0	0.0001	0.0002	Q2KCF0	67.96						104.45
64819@20170914_03_MJLorite_iTRAQ.cmpd.rclb.mgf	211.22	906.217	4	0	0.0062	0	2	RLIR	DSANVDYYATFDNFQVGVLQANSIVDGLGLK	DGKG	MOD:01485 D1;MOD:01485 K31	0	5613	Q2K5F5	Q2K5F5{120-150}	0	0.0001	0.0002	Q2K5F5	87.15						125.32
24776@20170914_03_MJLorite_iTRAQ.cmpd.rclb.mgf	85.23	640.685	3	0	0.0073	0	2		TSINTNSSAQAALQTLR	NVNQ	MOD:01485 T1	0	5239	Q2KCF1	Q2KCF1{2-18}	0	0.0001	0.0002	Q2KCF1	96.09						105.009
14824@20170914_03_MJLorite_iTRAQ.cmpd.rclb.mgf	56.02	687.379	2	0	-0.0049	0	2		AAVQETIDQVR	LIDV	MOD:01485 A1	0	7360	Q2K803	Q2K803{2-12}	0	0.0001	0.0002	Q2K803	61.66						123.602
57370@20170914_03_MJLorite_iTRAQ.cmpd.rclb.mgf	183.25	765.139	4	0	0.0006	0	2	AAVR	EFFGSSQLSQFMDQVNPLSEITHK	RRLS	MOD:01485 E1;MOD:01485 K24	0	4923	Q2K9M4	Q2K9M4{514-537}	0	0.0001	0.0002	Q2K9M4	67.23						83.305
27712@20170914_03_MJLorite_iTRAQ.cmpd.rclb.mgf	93.85	583.061	4	0	0.0099	0	2	PVPK	AGDQGYISDHPDIGVALNAK	STHA	MOD:01485 A1;MOD:01485 K20	0	8161	Q2K670	Q2K670{290-309}	0	0.0001	0.0002	Q2K670	94.03						72.9746
57314@20170914_03_MJLorite_iTRAQ.cmpd.rclb.mgf	183.08	755.64	4	0	0.01	0	2	KTSK	NHGAAYIASFPIPEVVMGINSFEQGAR	SVDP	MOD:01485 N1	0	10500	Q2K8G8	Q2K8G8{150-176}	0	0.0001	0.0002	Q2K8G8	95.55						83.4525
43921@20170914_03_MJLorite_iTRAQ.cmpd.rclb.mgf	141.42	685.868	4	0	-0.0039	0	2	REFR	AGAANETVDINAIPADAMVLDVGPK	SVEA	MOD:01485 A1;MOD:01485 K25	0	9884	Q2K4I1	Q2K4I1{294-318}	0	0.0001	0.0002	Q2K4I1	74.88						104.775
38156@20170914_03_MJLorite_iTRAQ.cmpd.rclb.mgf	124.47	702.09	4	0	0.0093	0	2	DQYK	AAYGHVLSGDYGTAEEEFNQYIAR	YPSS	MOD:01485 A1	0	4009	Q2K4M0	Q2K4M0{131-154}	0	0.0001	0.0002	Q2K4M0	64.27						84.0366
29822@20170914_03_MJLorite_iTRAQ.cmpd.rclb.mgf	100.05	816.739	3	0	0.006	0	2	FLTK	QVDANNGAVTDVQGTYGTFHVK	ADGS	MOD:00040 Q1;MOD:01485 K22	0	201	Q2K1Q3	Q2K1Q3{162-183}	0	0.0001	0.0002	Q2K1Q3	79.2						102.235
57572@20170914_03_MJLorite_iTRAQ.cmpd.rclb.mgf	183.83	1137.26	3	0	0.0201	0	2	GGNK	VSEMSLTIYGDTIADGQHISLAALGAVDFVR	FDIQ	MOD:01485 V1;MOD:00719 M4	0	6636	Q2K890	Q2K890{219-249}	0	0.0001	0.0002	Q2K890	62.35						104.695
45893@20170914_03_MJLorite_iTRAQ.cmpd.rclb.mgf	147.22	639.863	4	0	0.0027	0	2	VVPK	TGVVAGVYVQAISAFAPHPNAAK	LWME	MOD:01485 T1;MOD:01485 K23	0	2394	Q2K678	Q2K678{266-288}	0	0.0001	0.0002	Q2K678	95.53						82.7115
52919@20170914_03_MJLorite_iTRAQ.cmpd.rclb.mgf	169.52	625.857	4	0	0.008	0	2	PKVK	TIGYLYNSGEANSVSLLAVLK	AEAE	MOD:01485 T1;MOD:01485 K21	0	5726	Q2K3B2	Q2K3B2{156-176}	0	0.0001	0.0002	Q2K3B2	101.64						82.7364
31409@20170914_03_MJLorite_iTRAQ.cmpd.rclb.mgf	104.7	638.102	4	0	0.0021	1	2	TLGR	IMNVIGEPVDEAGPLNTAHKR	AIHQ	MOD:01485 I1;MOD:01485 K20	0	8381	Q2K3H0	Q2K3H0{93-113}	0	0.0001	0.0002	Q2K3H0	68.61						63.3414
32542@20170914_03_MJLorite_iTRAQ.cmpd.rclb.mgf	108.02	614.341	3	0	-0.0002	0	2		TQITVGVVDDHPLFR	EGVT	MOD:01485 T1	0	10228	Q2K9F7	Q2K9F7{2-16}	0	0.0001	0.0002	Q2K9F7	67.8						91.5038
32255@20170914_03_MJLorite_iTRAQ.cmpd.rclb.mgf	107.17	975.518	2	0	0.0035	0	2		TSINTNNAAMAALQTLR	GINQ	MOD:01485 T1;MOD:00719 M10	0	5239	Q2KCF0	Q2KCF0{2-18}	0	0.0001	0.0002	Q2KCF0	85						121.732
48049@20170914_03_MJLorite_iTRAQ.cmpd.rclb.mgf	153.5	645.369	3	0	-0.0001	0	2		TSILTNVAAMAALQTLR	GIND	MOD:01485 T1;MOD:00719 M10	0	5239	Q2KCE9	Q2KCE9{2-18}	0	0.0001	0.0002	Q2KCE9	63.12						104.63
40485@20170914_03_MJLorite_iTRAQ.cmpd.rclb.mgf	131.33	1167.3	3	0	0.0114	0	2	RVSR	GGTPQYVQAPIAAPAFAAPAAAATPAAAAAAPAAAPGR	NPAN	MOD:01485 G1	0	6597	Q2K925	Q2K925{42-79}	0	0.0001	0.0002	Q2K925	87.83						158.005
61355@20170914_03_MJLorite_iTRAQ.cmpd.rclb.mgf	195.02	519.296	4	0	0.0008	0	2	NPEK	MIADLEDVFILLHEK	KLSN	MOD:01485 M1;MOD:01485 K15	0	6161	Q2KBZ7	Q2KBZ7{211-225}	0	0.0001	0.0002	Q2KBZ7	71.91						60.511
34762@20170914_03_MJLorite_iTRAQ.cmpd.rclb.mgf	114.53	625.669	3	0	0.0005	1	2		SERLEDIAVQMVAGGR	GLLA	MOD:01485 S1	0	4233	Q2K4I0	Q2K4I0{2-17}	0	0.0001	0.0002	Q2K4I0	85.93						92.3301
59104@20170914_03_MJLorite_iTRAQ.cmpd.rclb.mgf	188.35	600.329	4	0	0.0098	0	2	TYVR	EGIEIYGNLFDDLTQAALK	VDRP	MOD:01485 E1;MOD:01485 K19	0	3818	Q2K709	Q2K709{303-321}	0	0.0001	0.0002	Q2K709	78.56						80.8435
56972@20170914_03_MJLorite_iTRAQ.cmpd.rclb.mgf	182.07	1068.82	4	0	0.011	0	2	VDAK	YSSSENYEQQIVIDTQAGSPPNVAILPQPGLLADLAGK	GFLT	MOD:01485 Y1;MOD:01485 K38	0	4702	Q2KCC4	Q2KCC4{85-122}	0	0.0001	0.0002	Q2KCC4	69.81						130.676
52223@20170914_03_MJLorite_iTRAQ.cmpd.rclb.mgf	166.1	1002.86	3	0	0.0042	0	2	ADGK	MAQLNQQPLGTGPFTFVAYQPDAVIR	YKAN	MOD:01485 M1	0	474	Q2KC86	Q2KC86{196-221}	0	0.0001	0.0002	Q2KC86	91.76						133.181
57634@20170914_03_MJLorite_iTRAQ.cmpd.rclb.mgf	184.03	628.902	5	0	0.0051	0	2	ELIR	AGFETLTEAGYAPEMAYFECLHEVK	LIVD	MOD:00110 C20;MOD:01485 A1;MOD:01485 K25	0	6117	Q2K6M2	Q2K6M2{209-233}	0	0.0001	0.0002	Q2K6M2	65.23						61.9372
35560@20170914_03_MJLorite_iTRAQ.cmpd.rclb.mgf	116.88	574.556	4	0	-0.0067	0	2	AASR	VDVSDPVAAWAEHNANLAK	RSAW	MOD:01485 V1;MOD:01485 K19	0	9869	Q2KDI3	Q2KDI3{187-205}	0	0.0001	0.0002	Q2KDI3	87.26						90.2365
45557@20170914_03_MJLorite_iTRAQ.cmpd.rclb.mgf	146.22	565.294	4	0	-0.0003	0	2	GAAK	VDTAYSAMDSAIDVVGDIK	AKLV	MOD:01485 V1;MOD:01485 K19	0	5239	Q2KCF0	Q2KCF0{74-92}	0	0.0001	0.0002	Q2KCF0	87.45						73.2613
46000@20170914_03_MJLorite_iTRAQ.cmpd.rclb.mgf	147.52	809.686	4	0	0.0061	1	2	DAFK	ATLNAGGITEVVNDAITPGDKDFSALTTR	IKSE	MOD:01485 A1;MOD:01485 K21	0	5167	Q2K5M7	Q2K5M7{181-209}	0	0.0001	0.0002	Q2K5M7	74.06						113.209
44475@20170914_03_MJLorite_iTRAQ.cmpd.rclb.mgf	143.03	1235.12	2	0	-0.001	0	2	PWNK	YVEGGSYEYAAGMGFPELIK	SVEK	MOD:01485 Y1;MOD:01485 K20	0	474	Q2KC86	Q2KC86{130-149}	0	0.0001	0.0002	Q2KC86	78.09						149.931
55464@20170914_03_MJLorite_iTRAQ.cmpd.rclb.mgf	176.98	1193.13	4	0	0.0072	0	2	EQHR	AEIGVPVVTYESTASVVPADPQPAPGDELIGPVGAVETITPPETVR	TYIE	MOD:01485 A1	0	3301	Q2K5V7	Q2K5V7{99-144}	0	0.0001	0.0002	Q2K5V7	61.86						110.941
47160@20170914_03_MJLorite_iTRAQ.cmpd.rclb.mgf	150.9	751.363	4	0	0.0038	0	2	VPYK	GTGPAMTDLLGGQVDIMCDQTTNTTK	QIKG	MOD:00110 C18;MOD:01485 G1;MOD:01485 K26	0	8013	Q2K4P7	Q2K4P7{187-212}	0	0.0001	0.0002	Q2K4P7	92.81						95.2994
45346@20170914_03_MJLorite_iTRAQ.cmpd.rclb.mgf	145.6	504.795	4	0	0.0031	0	2	NGNK	LAAEAGLADLSLEEVVK	KSFG	MOD:01485 L1;MOD:01485 K17	0	3834	Q2KAX8	Q2KAX8{42-58}	0	0.0001	0.0002	Q2KAX8	99.98						77.7694
32013@20170914_03_MJLorite_iTRAQ.cmpd.rclb.mgf	106.47	841.399	3	0	0.0229	0	2	SSLK	TNLPDATSFSSSYQTWSDTNR	DTIA	MOD:01485 T1	0	478	Q2K2Q6	Q2K2Q6{139-159}	0	0.0001	0.0002	Q2K2Q6	86.95						112.847
56606@20170914_03_MJLorite_iTRAQ.cmpd.rclb.mgf	181	968.258	4	0	0.0095	0	2	DTVR	TTLASYTLGSDLENLTYSGTVAFTGTGNSLANTIK	GGAG	MOD:01485 T1;MOD:01485 K35	0	6947	Q2KC97	Q2KC97{546-580,1149-1183}	0	0.0001	0.0002	Q2KC97	86.49						118.195
44779@20170914_03_MJLorite_iTRAQ.cmpd.rclb.mgf	143.95	623.571	4	0	0.0005	0	2		ASTLHSFASAADLAGSLADTVADR	LSAA	MOD:01485 A1	0	938	Q2KCB7	Q2KCB7{2-25}	0	0.0001	0.0002	Q2KCB7	77.09						78.974
38748@20170914_03_MJLorite_iTRAQ.cmpd.rclb.mgf	126.2	593.304	5	0	0.0058	0	2	VVKK	SFGTNAGLFNNAAQHYNHIHFWK	WMKK	MOD:01485 S1;MOD:01485 K23	0	3834	Q2KAX8	Q2KAX8{60-82}	0	0.0001	0.0002	Q2KAX8	59.6						106.036
34022@20170914_03_MJLorite_iTRAQ.cmpd.rclb.mgf	112.37	765.627	4	0	0.0073	0	2	GNAR	DYDISGNHIHDGAWGVAVSGPIGASYTR	TNIE	MOD:01485 D1	0	1972	Q2K708	Q2K708{270-297}	0	0.0001	0.0002	Q2K708	103.8						107.444
51164@20170914_03_MJLorite_iTRAQ.cmpd.rclb.mgf	162.65	695.617	4	0	0.0078	0	2	ALAR	AGVDAGEVDEVILGQVLAAGEGQNPAR	QAAI	MOD:01485 A1	0	8991	Q2K324	Q2K324{43-69}	0	0.0001	0.0002	Q2K324	103.29						94.0703
47552@20170914_03_MJLorite_iTRAQ.cmpd.rclb.mgf	152.05	751.89	4	0	0.0047	0	2	HGKR	NAALIGAGIGALAGGAIGNYMDQQEAELR	AQLE	MOD:01485 N1;MOD:00719 M21	0	998	Q2K6F8	Q2K6F8{60-88}	0	0.0001	0.0002	Q2K6F8	99.73						99.8852
38049@20170914_03_MJLorite_iTRAQ.cmpd.rclb.mgf	124.17	536.795	4	0	0.0055	0	2	TKDK	AGWVENAAQEPALVAAMK	TGHS	MOD:01485 A1;MOD:01485 K18	0	8943	Q2K3B0	Q2K3B0{115-132}	0	0.0001	0.0002	Q2K3B0	61.81						74.4135
55699@20170914_03_MJLorite_iTRAQ.cmpd.rclb.mgf	177.68	892.231	4	0	0.0117	1	2	RHWR	RNDALVGGAVGLATGLIVGSAIANANNGPVYDEPR	YIDP	MOD:01485 R1	0	6036	Q2K5W3	Q2K5W3{34-68}	0	0.0001	0.0002	Q2K5W3	97.01						123.992
46833@20170914_03_MJLorite_iTRAQ.cmpd.rclb.mgf	149.95	751.361	4	0	-0.0067	0	2	VPYK	GTGPAMTDLLGGQVDIMCDQTTNTTK	QIKG	MOD:00110 C18;MOD:01485 G1;MOD:01485 K26	0	8013	Q2K4P7	Q2K4P7{187-212}	0	0.0001	0.0002	Q2K4P7	71.18						94.0429
61835@20170914_03_MJLorite_iTRAQ.cmpd.rclb.mgf	196.53	720.896	4	0	0.001	0	2	QTIR	FAVGLEEPELLWNDLQQALHAAK	R	MOD:01485 F1;MOD:01485 K23	0	7001	Q2JYI5	Q2JYI5{372-394}	0	0.0001	0.0002	Q2JYI5	83.83						111.232
61902@20170914_03_MJLorite_iTRAQ.cmpd.rclb.mgf	196.72	854.734	4	0	0.0054	0	2	ESSK	LTALQTQQQLAIQSLSIANSSAQNILTLFR	S	MOD:01485 L1	0	5239	Q2KCE9	Q2KCE9{273-302}	0	0.0001	0.0002	Q2KCE9	116.84						118.667
49858@20170914_03_MJLorite_iTRAQ.cmpd.rclb.mgf	158.82	810.65	4	0	0.0054	0	2	GADR	LIGGTGDDTYIVDNAGDLVTEAADAGTDTVR	TALS	MOD:01485 L1	0	6947	Q2KC97	Q2KC97{945-975,1548-1578}	0	0.0001	0.0002	Q2KC97	87.58						116.67
50893@20170914_03_MJLorite_iTRAQ.cmpd.rclb.mgf	161.87	638.339	4	0	0.0006	1	2	SISK	RIELQENFVSALSDSIDSGIGR	LVDA	MOD:01485 R1	0	5239	Q2KCF0	Q2KCF0{238-259}	0	0.0001	0.0002	Q2KCF0	62.17						60.9941
15923@20170914_03_MJLorite_iTRAQ.cmpd.rclb.mgf	59.25	521.964	3	0	-0.0044	0	2	ALER	ADIRPSVEGGFK	ELLA	MOD:01485 A1;MOD:01485 K12	0	7180	Q2K4B9	Q2K4B9{277-288}	0	0.0001	0.0002	Q2K4B9	59.47						83.0898
51043@20170914_03_MJLorite_iTRAQ.cmpd.rclb.mgf	162.3	665.125	4	0	0.0111	0	2	AGER	ILDVISAAGGLTTNNIETNVTLQR	RGRT	MOD:01485 I1	0	180	Q2K587	Q2K587{205-228}	0	0.0001	0.0002	Q2K587	91.46						81.315
10085@20170914_03_MJLorite_iTRAQ.cmpd.rclb.mgf	42.08	662.314	4	0	0.0119	0	2	QYGR	HNLSAVGQEGNDNYGATYQHGNR	NVAG	MOD:01485 H1	0	2383	Q2K0F5	Q2K0F5{69-91}	0	0.0001	0.0002	Q2K0F5	81.64						80.022
51314@20170914_03_MJLorite_iTRAQ.cmpd.rclb.mgf	163.17	619.812	6	0	0.0058	0	2	NIVK	QLQAAGYGTDLQYGDDDIPNQLSQIENMVTK	GVKV	MOD:01485 Q1;MOD:01485 K31	0	5613	Q2K5F5	Q2K5F5{52-82}	0	0.0001	0.0002	Q2K5F5	66.81						54.2484
50201@20170914_03_MJLorite_iTRAQ.cmpd.rclb.mgf	159.83	638.34	4	0	0.0034	1	2	SISK	RIELQENFVSALSDSIDSGIGR	LVDA	MOD:01485 R1	0	5239	Q2KCF0	Q2KCF0{238-259}	0	0.0001	0.0002	Q2KCF0	58.96						72.6544
26206@20170914_03_MJLorite_iTRAQ.cmpd.rclb.mgf	89.43	516.283	4	0	0.0002	0	2	ILAK	GNVIQGTDQLLSADSQK	QKED	MOD:01485 G1;MOD:01485 K17	0	2233	Q2K7E8	Q2K7E8{362-378}	0	0.0001	0.0002	Q2K7E8	77.01						60.7566
35647@20170914_03_MJLorite_iTRAQ.cmpd.rclb.mgf	117.13	484.263	4	0	-0.0003	0	2		TSINTNNAAMAALQTLR	GINQ	MOD:01485 T1	0	5239	Q2KCF0	Q2KCF0{2-18}	0	0.0001	0.0002	Q2KCF0	87.1						66.3171
9508@20170914_03_MJLorite_iTRAQ.cmpd.rclb.mgf	40.4	494.001	4	0	0.0025	1	2	AQIK	AQIEETTSDYDREK	LQER	MOD:01485 A1;MOD:01485 K14	0	6161	Q2JYW6;Q2KAU2;Q2KBZ7	Q2JYW6{351-364};Q2KAU2{351-364};Q2KBZ7{351-364}	0	0.0001	0.0002	Q2JYW6;Q2KAU2;Q2KBZ7	62.46						47.1794
55516@20170914_03_MJLorite_iTRAQ.cmpd.rclb.mgf	177.15	831.424	3	0	-0.002	0	2	DESK	TNYGYTVGAGVEAFVTNNITTR	LEYR	MOD:01485 Y3	0	5698	Q2KA52	Q2KA52{153-174}	0	0.0001	0.0002	Q2KA52	62.47						107.491
47447@20170914_03_MJLorite_iTRAQ.cmpd.rclb.mgf	151.75	501.037	4	0	0.0071	0	2	KDAK	VGFLDLTPSQPTVDVLR	DQGF	MOD:01485 V1	0	5517	Q2KD00	Q2KD00{156-172}	0	0.0001	0.0002	Q2KD00	66.99						72.1468
59375@20170914_03_MJLorite_iTRAQ.cmpd.rclb.mgf	189.15	650.884	4	0	0.0027	0	2	ANPK	LVGVFASNLILAQGVGQAIAENK	LGDK	MOD:01485 L1;MOD:01485 K23	0	8759	Q2KCX3	Q2KCX3{224-246}	0	0.0001	0.0002	Q2KCX3	91.17						87.7639
45948@20170914_03_MJLorite_iTRAQ.cmpd.rclb.mgf	147.37	549.557	4	0	0.0026	0	2	ADTK	IGTDLGLTNEWAYNIVK	NVGN	MOD:01485 I1;MOD:01485 K17	0	6573	Q2K902	Q2K902{291-307}	0	0.0001	0.0002	Q2K902	65.78						68.1449
44963@20170914_03_MJLorite_iTRAQ.cmpd.rclb.mgf	144.48	616.573	4	0	-0.0061	0	2	SYAK	IIAEGGSAGGMLMGAVANMAPEK	FAGI	MOD:01485 I1;MOD:01485 K23	0	4291	Q2KAV5	Q2KAV5{548-570}	0	0.0001	0.0002	Q2KAV5	93.77						96.4096
55185@20170914_03_MJLorite_iTRAQ.cmpd.rclb.mgf	176.17	807.384	4	0	0.004	0	2	NGNK	LMNEFYATQGMYALPAGNTGAQMGGWFR	KEIN	MOD:01485 L1	0	2578	Q2K462	Q2K462{138-165}	0	0.0001	0.0002	Q2K462	77.81						115.129
40387@20170914_03_MJLorite_iTRAQ.cmpd.rclb.mgf	131.05	707.863	4	0	0.002	0	2	AQDK	NYTIGVSIPAADHGWTSGVVFHAER	IAKK	MOD:01485 N1	0	1534	Q2K437	Q2K437{25-49}	0	0.0001	0.0002	Q2K437	83.22						93.3199
46640@20170914_03_MJLorite_iTRAQ.cmpd.rclb.mgf	149.38	589.544	4	0	0.005	0	2	LSSR	IDSQEDFVSALSDSIDSGIGR	LVDA	MOD:01485 I1	0	5239	Q2KCF1	Q2KCF1{239-259}	0	0.0001	0.0002	Q2KCF1	86.66						81.299
65157@20170914_03_MJLorite_iTRAQ.cmpd.rclb.mgf	236.2	701.396	4	0	-0.0054	1	2	LIAK	MKEAGVSIIYWGGLHTEAGLIIR	QAAD	MOD:01485 M1;MOD:01485 K2	0	3055	Q2K502	Q2K502{211-233}	0	0.0001	0.0002	Q2K502	70.25						81.7037
43650@20170914_03_MJLorite_iTRAQ.cmpd.rclb.mgf	140.63	693.631	4	0	0.001	0	2	KPDR	GGADIFVHISAVQASGLAGLTENQK	VSFD	MOD:01485 G1;MOD:01485 K25	0	7097	Q2K5W4	Q2K5W4{24-48}	0	0.0001	0.0002	Q2K5W4	82.63						87.5641
39020@20170914_03_MJLorite_iTRAQ.cmpd.rclb.mgf	127	689.886	4	0	0.0046	0	2	SSLK	GVGYGTAAQPLPIVTGQDAEIPSVK	SIIA	MOD:01485 G1;MOD:01485 K25	0	5613	Q2K5F5	Q2K5F5{249-273}	0	0.0001	0.0002	Q2K5F5	102.05						95.4989
43272@20170914_03_MJLorite_iTRAQ.cmpd.rclb.mgf	139.52	782.619	4	0	0.0043	0	2	DKLK	ITPGVQYYGDIYEAGDDFSDNDAWK	VGLT	MOD:01485 I1;MOD:01485 K25	0	6045	Q2K7H2	Q2K7H2{275-299}	0	0.0001	0.0002	Q2K7H2	90.74						81.1805
48351@20170914_03_MJLorite_iTRAQ.cmpd.rclb.mgf	154.38	638.34	4	0	0.0045	1	2	SISK	RIELQENFVSALSDSIDSGIGR	LVDA	MOD:01485 R1	0	5239	Q2KCF0	Q2KCF0{238-259}	0	0.0001	0.0002	Q2KCF0	76.01						63.3437
53027@20170914_03_MJLorite_iTRAQ.cmpd.rclb.mgf	169.83	867.695	4	0	0.0048	1	2	AMQK	VGNEGVITVEEAKTAETELEVVEGMQFDR	GYLS	MOD:01485 V1;MOD:01485 K13	0	6161	Q2KAU2;Q2KBZ7	Q2KAU2{169-197};Q2KBZ7{169-197}	0	0.0001	0.0002	Q2KAU2;Q2KBZ7	81.44						151.06
57133@20170914_03_MJLorite_iTRAQ.cmpd.rclb.mgf	182.55	755.64	4	0	0.0098	0	2	KTSK	NHGAAYIASFPIPEVVMGINSFEQGAR	SVDP	MOD:01485 N1	0	10500	Q2K8G8	Q2K8G8{150-176}	0	0.0001	0.0002	Q2K8G8	113.18						91.1796
56956@20170914_03_MJLorite_iTRAQ.cmpd.rclb.mgf	182.03	755.64	4	0	0.0098	0	2	KTSK	NHGAAYIASFPIPEVVMGINSFEQGAR	SVDP	MOD:01485 N1	0	10500	Q2K8G8	Q2K8G8{150-176}	0	0.0001	0.0002	Q2K8G8	106.5						85.1696
62283@20170914_03_MJLorite_iTRAQ.cmpd.rclb.mgf	197.85	645.851	4	0	0.002	0	2	DSTR	HNIETQEALADLIAAAESIASIR	ERTG	MOD:01485 H1	0	10120	Q2K484	Q2K484{509-531}	0	0.0001	0.0002	Q2K484	116						101.361
38793@20170914_03_MJLorite_iTRAQ.cmpd.rclb.mgf	126.33	785.72	3	0	-0.0023	0	2	LSSR	IDSQEDFVSALSDSIDSGIGR	LVDA	MOD:01485 I1	0	5239	Q2KCF1	Q2KCF1{239-259}	0	0.0001	0.0002	Q2KCF1	79.88						114.162
53459@20170914_03_MJLorite_iTRAQ.cmpd.rclb.mgf	171.1	654.357	4	0	0.0047	0	2	TLGR	AAIYPAGSWEIALFNTQAQFK	MGAF	MOD:01485 A1;MOD:01485 K21	0	8161	Q2K670	Q2K670{259-279}	0	0.0001	0.0002	Q2K670	68.25						71.8115
56077@20170914_03_MJLorite_iTRAQ.cmpd.rclb.mgf	179.05	710.368	4	0	0.0024	0	2	EKFK	AAGFNPEAYTLYSYAAMQAIAGAAK	AAGS	MOD:01485 A1;MOD:01485 K25	0	3055	Q2K502	Q2K502{289-313}	0	0.0001	0.0002	Q2K502	76.25						89.0877
47236@20170914_03_MJLorite_iTRAQ.cmpd.rclb.mgf	151.13	501.037	4	0	0.0084	0	2	KDAK	VGFLDLTPSQPTVDVLR	DQGF	MOD:01485 V1	0	5517	Q2KD00	Q2KD00{156-172}	0	0.0001	0.0002	Q2KD00	69.39						76.4123
43302@20170914_03_MJLorite_iTRAQ.cmpd.rclb.mgf	139.6	911.204	4	0	0.0022	1	2	GNVK	VSDGTSDESKTNYGYTVGAGVEAFVTNNITTR	LEYR	MOD:01485 V1;MOD:01485 K10	0	5698	Q2KA52	Q2KA52{143-174}	0	0.0001	0.0002	Q2KA52	61.03						86.9482
40322@20170914_03_MJLorite_iTRAQ.cmpd.rclb.mgf	130.85	726.621	4	0	0.0061	0	2	PITK	ADGSEGAATGATLTDAQIVAMDWHVK	GVTT	MOD:01485 A1;MOD:01485 K26	0	3307	Q2K1D3	Q2K1D3{333-358}	0	0.0001	0.0002	Q2K1D3	77.02						100.287
54018@20170914_03_MJLorite_iTRAQ.cmpd.rclb.mgf	172.73	823.072	6	0	0.01	0	2	ADGK	GGTDVGSLSIGVHTPPQGQYSFDFEDAPTEYPGLPDIASGYAGFK	FGDK	MOD:01485 G1;MOD:01485 K45	0	6636	Q2K890	Q2K890{104-148}	0	0.0001	0.0002	Q2K890	60.22						87.4584
60259@20170914_03_MJLorite_iTRAQ.cmpd.rclb.mgf	191.77	546.083	4	0	-0.0038	0	2	ARNK	IALIGSGMIGGTLAHLAGLK	ELGD	MOD:01485 I1;MOD:01485 K20	0	1302	Q2K3E9	Q2K3E9{6-25}	0	0.0001	0.0002	Q2K3E9	66.09						83.7057
58201@20170914_03_MJLorite_iTRAQ.cmpd.rclb.mgf	185.68	939.157	3	0	-0.0071	0	2	LPDR	GSAGAALEADEIQLAAFSAVPLADLDR	ISKV	MOD:01485 G1	0	10010	Q2K249	Q2K249{241-267}	0	0.0001	0.0002	Q2K249	79.48						128.681
29904@20170914_03_MJLorite_iTRAQ.cmpd.rclb.mgf	100.28	650.681	3	0	0.0037	0	2		TSINTNNAAMAALQTLR	GINQ	MOD:01485 T1;MOD:00719 M10	0	5239	Q2KCF0	Q2KCF0{2-18}	0	0.0001	0.0002	Q2KCF0	85.27						116.95
28997@20170914_03_MJLorite_iTRAQ.cmpd.rclb.mgf	97.63	562.804	4	0	0.0051	0	2	GDAK	IIVAGGQESMSMAPHAVHLR	GGVK	MOD:01485 I1	0	8991	Q2K324	Q2K324{111-130}	0	0.0001	0.0002	Q2K324	67.02						74.4931
55916@20170914_03_MJLorite_iTRAQ.cmpd.rclb.mgf	178.42	618.838	4	0	-0.0038	0	2	YKNR	TDVLMMVFDKPASVAGVFTR	SKCP	MOD:01485 T1;MOD:01485 K10	0	7928	Q2K3R9	Q2K3R9{37-56}	0	0.0001	0.0002	Q2K3R9	58.47						81.8517
42316@20170914_03_MJLorite_iTRAQ.cmpd.rclb.mgf	136.72	460.282	4	0	-0.0041	0	2	KLAR	GLEHLSELALVQLK	EVLD	MOD:01485 G1;MOD:01485 K14	0	4334	Q2KCV4	Q2KCV4{124-137}	0	0.0001	0.0002	Q2KCV4	58.52						51.145
60817@20170914_03_MJLorite_iTRAQ.cmpd.rclb.mgf	193.4	937.189	3	0	0.0041	0	2	AASR	LDVVQAEGLVQSTLAEIPGLETNIR	VSAH	MOD:01485 L1	0	7622	Q2K4R6	Q2K4R6{212-236}	0	0.0001	0.0002	Q2K4R6	63.13						151.562
52720@20170914_03_MJLorite_iTRAQ.cmpd.rclb.mgf	168.93	754.777	3	1	-0.011	0	2	NTGR	IIAGGVAAGVVGGLIGGAIANGGPR	YVDE	MOD:01485 I1	0	8825	Q2K013	Q2K013{36-60}	0	0.0001	0.0002	Q2K013	60.58						112.088
29605@20170914_03_MJLorite_iTRAQ.cmpd.rclb.mgf	99.42	650.681	3	0	0.0041	0	2		TSINTNNAAMAALQTLR	GINQ	MOD:01485 T1;MOD:00719 M10	0	5239	Q2KCF0	Q2KCF0{2-18}	0	0.0001	0.0002	Q2KCF0	76.87						107.422
41423@20170914_03_MJLorite_iTRAQ.cmpd.rclb.mgf	134.08	634.819	4	0	0.0106	0	2	RAAK	ADIQVFQNMTGTTGAAWNDPVR	GGEL	MOD:01485 A1	0	2076	Q2KDS5	Q2KDS5{173-194}	0	0.0001	0.0002	Q2KDS5	67.59						76.0792
57666@20170914_03_MJLorite_iTRAQ.cmpd.rclb.mgf	184.13	651.109	4	0	0.0042	0	2	VRGR	VGYDMNPFLLYGTAGLALGNVK	VSDG	MOD:01485 V1;MOD:01485 K22	0	5698	Q2KA52	Q2KA52{121-142}	0	0.0001	0.0002	Q2KA52	83.17						90.4193
33977@20170914_03_MJLorite_iTRAQ.cmpd.rclb.mgf	112.23	599.076	4	0	-0.0016	0	2	TLGR	IMNVIGEPVDEAGPLNTAHK	RAIH	MOD:01485 I1;MOD:01485 K20	0	8381	Q2K3H0	Q2K3H0{93-112}	0	0.0001	0.0002	Q2K3H0	62.62						70.2472
41302@20170914_03_MJLorite_iTRAQ.cmpd.rclb.mgf	133.73	595.591	4	0	0.0116	0	2	DQQK	LNVQASEPVAINNTFVLIHR	SEEN	MOD:01485 L1	0	6989	Q2K0L8	Q2K0L8{212-231}	0	0.0001	0.0002	Q2K0L8	68.29						72.1701
51208@20170914_03_MJLorite_iTRAQ.cmpd.rclb.mgf	162.78	929.215	4	0	0.0062	0	2	NIVK	QLQAAGYGTDLQYGDDDIPNQLSQIENMVTK	GVKV	MOD:01485 Q1;MOD:01485 K31	0	5613	Q2K5F5	Q2K5F5{52-82}	0	0.0001	0.0002	Q2K5F5	113.91						126.155
57300@20170914_03_MJLorite_iTRAQ.cmpd.rclb.mgf	183.03	978.985	4	0	0.0217	0	2	DDIK	MYYAEYGEGDPILFIHGGLGNTGVWGHQIAEFAR	DHLV	MOD:01485 M1	0	4306	Q2KDZ8	Q2KDZ8{52-85}	0	0.0001	0.0002	Q2KDZ8	67.58						111.016
47437@20170914_03_MJLorite_iTRAQ.cmpd.rclb.mgf	151.7	868.943	4	0	0.0037	0	2	QAFR	TSPGSTVAAQGAITAAQDVANSLNNASQSVQDVR	ANAD	MOD:01485 T1	0	3383	Q2KCE0	Q2KCE0{116-149}	0	0.0001	0.0002	Q2KCE0	96.25						122.395
64608@20170914_03_MJLorite_iTRAQ.cmpd.rclb.mgf	206.2	625.596	4	0	-0.0002	0	2	GGDR	VTGDHMGMLGTIINALALATSLR	KLNI	MOD:01485 V1	0	9737	Q2K8Y5	Q2K8Y5{72-94}	0	0.0001	0.0002	Q2K8Y5	61.17						108.385
44416@20170914_03_MJLorite_iTRAQ.cmpd.rclb.mgf	142.88	534.045	4	0	0.0029	0	2	DAWK	VGLTVDYQIVDNFYAK	ASVQ	MOD:01485 V1;MOD:01485 K16	0	6045	Q2K7H2;Q2KAI4	Q2K7H2{300-315};Q2KAI4{300-315}	0	0.0001	0.0002	Q2K7H2;Q2KAI4	72.2						70.4153
28597@20170914_03_MJLorite_iTRAQ.cmpd.rclb.mgf	96.45	411.736	4	0	0.0017	0	2	LGEK	VVLELADDAGEPK	QGVS	MOD:01485 V1;MOD:01485 K13	0	5167	Q2K5M7	Q2K5M7{65-77}	0	0.0001	0.0002	Q2K5M7	79.22						40.9263
31318@20170914_03_MJLorite_iTRAQ.cmpd.rclb.mgf	104.43	638.102	4	0	0.0021	1	2	TLGR	IMNVIGEPVDEAGPLNTAHKR	AIHQ	MOD:01485 I1;MOD:01485 K20	0	8381	Q2K3H0	Q2K3H0{93-113}	0	0.0001	0.0002	Q2K3H0	78.58						51.6256
24200@20170914_03_MJLorite_iTRAQ.cmpd.rclb.mgf	83.55	559.789	4	0	0.0026	0	2	GASR	AAVDAGYAPNDWQVGQTGK	VVAP	MOD:01485 A1;MOD:01485 K19	0	2103	Q2JYP2	Q2JYP2{229-247}	0	0.0001	0.0002	Q2JYP2	59.51						87.8669
25779@20170914_03_MJLorite_iTRAQ.cmpd.rclb.mgf	88.18	416.233	4	0	0.0043	0	2	GIEK	AGSAEDAEAVAAALK	GGME	MOD:01485 A1;MOD:01485 K15	0	5167	Q2K5M7	Q2K5M7{314-328}	0	0.0001	0.0002	Q2K5M7	81.07						56.2282
44637@20170914_03_MJLorite_iTRAQ.cmpd.rclb.mgf	143.52	622.33	4	0	0.0083	0	2	LGRR	HLMVNIPAAYVEAVEDGSVATR	HTAV	MOD:01485 H1	0	6383	Q2KA26	Q2KA26{198-219}	0	0.0001	0.0002	Q2KA26	91.03						77.611
45540@20170914_03_MJLorite_iTRAQ.cmpd.rclb.mgf	146.17	669.104	4	0	0.0025	0	2	KKLR	EFDGYIFTVAEYNHAPTAVLK	NAID	MOD:01485 E1;MOD:01485 K21	0	1059	Q2K339	Q2K339{73-93}	0	0.0001	0.0002	Q2K339	73.44						96.5048
49403@20170914_03_MJLorite_iTRAQ.cmpd.rclb.mgf	157.48	756.397	4	0	0.0013	0	2	ADGK	MAQLNQQPLGTGPFTFVAYQPDAVIR	YKAN	MOD:01485 M1;MOD:00719 M1	0	474	Q2KC86	Q2KC86{196-221}	0	0.0001	0.0002	Q2KC86	87.82						80.3782
39003@20170914_03_MJLorite_iTRAQ.cmpd.rclb.mgf	126.93	880.44	3	0	0.0148	0	2	NQLR	SIVDQGQSISFSMGNADDVLQQR	FQSY	MOD:01485 S1	0	478	Q2K2Q6	Q2K2Q6{108-130}	0	0.0001	0.0002	Q2K2Q6	119.01						128.173
50736@20170914_03_MJLorite_iTRAQ.cmpd.rclb.mgf	161.42	519.808	4	0	0.0001	0	2	HYQR	LLDYIVPDTVHVLYK	GQVI	MOD:01485 L1;MOD:01485 K15	0	801	Q2K805	Q2K805{209-223}	0	0.0001	0.0002	Q2K805	67.21						67.7012
56006@20170914_03_MJLorite_iTRAQ.cmpd.rclb.mgf	178.77	568.496	5	0	0.0027	0	2	EKFK	AAGFNPEAYTLYSYAAMQAIAGAAK	AAGS	MOD:01485 A1;MOD:01485 K25	0	3055	Q2K502	Q2K502{289-313}	0	0.0001	0.0002	Q2K502	66.69						60.0181
18058@20170914_03_MJLorite_iTRAQ.cmpd.rclb.mgf	65.5	581.296	4	0	0.0067	0	2	LVVR	LTNDSPNNSDPAIAEGYQK	LFVD	MOD:01485 L1;MOD:01485 K19	0	6895	Q2JY83	Q2JY83{45-63}	0	0.0001	0.0002	Q2JY83	69.91						67.0063
34499@20170914_03_MJLorite_iTRAQ.cmpd.rclb.mgf	113.77	715.055	3	0	-0.0171	0	2	VDAK	GDGPTQVNQIQDLLTQK	IDAL	MOD:01485 G1;MOD:01485 K17	0	3146	Q2K7K6	Q2K7K6{66-82}	0	0.0001	0.0002	Q2K7K6	59.74						112.123
55477@20170914_03_MJLorite_iTRAQ.cmpd.rclb.mgf	177.03	748.161	4	0	0.0057	0	2	GAVR	ASESVGIPATNIIGVGIGGAESAINEFK	KPAA	MOD:01485 A1;MOD:01485 K28	0	4310	Q2K3Y6	Q2K3Y6{238-265}	0	0.0001	0.0002	Q2K3Y6	92.8						111.812
18788@20170914_03_MJLorite_iTRAQ.cmpd.rclb.mgf	67.65	387.215	4	0	-0.007	0	2	DIAR	NLEPGDIDAVSK	NADL	MOD:01485 N1;MOD:01485 K12	0	3376	Q2K350	Q2K350{278-289}	0	0.0001	0.0002	Q2K350	59.1						41.5007
29999@20170914_03_MJLorite_iTRAQ.cmpd.rclb.mgf	100.57	751.367	4	0	0.0085	0	2	DAAK	AMVDQGVDVLTQHTDTTAPMQVAEER	GIHA	MOD:01485 A1;MOD:00719 M2	0	10500	Q2K8G8	Q2K8G8{204-229}	0	0.0001	0.0002	Q2K8G8	107.31						116.317
44360@20170914_03_MJLorite_iTRAQ.cmpd.rclb.mgf	142.72	623.822	4	0	0.0054	0	2	DESK	TNYGYTVGAGVEAFVTNNITTR	LEYR	MOD:01485 T1	0	5698	Q2KA52	Q2KA52{153-174}	0	0.0001	0.0002	Q2KA52	75.92						67.2473
59463@20170914_03_MJLorite_iTRAQ.cmpd.rclb.mgf	189.4	556.553	4	0	0.0058	0	2	GLTK	SDAASAVDAVFDVVQAELK	NKGD	MOD:01485 S1;MOD:01485 K19	0	2382	Q2K9U4	Q2K9U4{19-37}	0	0.0001	0.0002	Q2K9U4	72.01						98.73
25368@20170914_03_MJLorite_iTRAQ.cmpd.rclb.mgf	86.98	560.316	4	0	0.0041	0	2	GQMK	ALQVGHEIAAQQVAQMQK	LRGL	MOD:01485 A1;MOD:01485 K18	0	478	Q2K2Q6	Q2K2Q6{199-216}	0	0.0001	0.0002	Q2K2Q6	63.4						62.1783
55938@20170914_03_MJLorite_iTRAQ.cmpd.rclb.mgf	178.52	710.368	4	0	0.0021	0	2	EKFK	AAGFNPEAYTLYSYAAMQAIAGAAK	AAGS	MOD:01485 A1;MOD:01485 K25	0	3055	Q2K502	Q2K502{289-313}	0	0.0001	0.0002	Q2K502	84.83						86.1206
40096@20170914_03_MJLorite_iTRAQ.cmpd.rclb.mgf	130.2	437.013	4	0	0.0022	0	2	DMQK	ALAADAVLFGAVGGPK	WDSV	MOD:01485 A1;MOD:01485 K16	0	2899	Q2K2V0	Q2K2V0{64-79}	0	0.0001	0.0002	Q2K2V0	96.21						72.8919
61682@20170914_03_MJLorite_iTRAQ.cmpd.rclb.mgf	196.08	710.618	4	0	-0.0076	0	2	RSTR	SQQPFGYDLMTSDYVALLDFLK	IDKV	MOD:01485 S1;MOD:01485 K22	0	4306	Q2KDZ8	Q2KDZ8{103-124}	0	0.0001	0.0002	Q2KDZ8	71.37						78.1818
64832@20170914_03_MJLorite_iTRAQ.cmpd.rclb.mgf	212.57	831.761	3	1	0.0092	0	2	DESK	TNYGYTVGAGVEAFVTNNITTR	LEYR	MOD:01485 T1	0	5698	Q2KA52	Q2KA52{153-174}	0	0.0001	0.0002	Q2KA52	98.14						128.196
54700@20170914_03_MJLorite_iTRAQ.cmpd.rclb.mgf	174.75	785.648	4	1	0.0045	0	2	LNVK	SALELSGASVCVQSGTTTELNLADYFK	ANNL	MOD:00110 C11;MOD:01485 S1;MOD:01485 K27	0	6573	Q2K902	Q2K902{146-172}	0	0.0001	0.0002	Q2K902	83.33						112.292
62163@20170914_03_MJLorite_iTRAQ.cmpd.rclb.mgf	197.5	726.155	4	0	0.0022	1	2	QRYK	ALQDIIAILGMDELSEEDKLAVAR	ARKI	MOD:01485 A1;MOD:01485 K19	0	8381	Q2K3H0	Q2K3H0{382-405}	0	0.0001	0.0002	Q2K3H0	59.06						85.4835
62074@20170914_03_MJLorite_iTRAQ.cmpd.rclb.mgf	197.23	726.155	4	0	0.0038	1	2	QRYK	ALQDIIAILGMDELSEEDKLAVAR	ARKI	MOD:01485 A1;MOD:01485 K19	0	8381	Q2K3H0	Q2K3H0{382-405}	0	0.0001	0.0002	Q2K3H0	91.68						76.0214
60199@20170914_03_MJLorite_iTRAQ.cmpd.rclb.mgf	191.6	626.602	4	0	0.0083	0	2	MRR	VVVTGLGIVSSIGSDAAEVTESLR	QAKS	MOD:01485 V1	0	4370	Q2KE03	Q2KE03{4-27}	0	0.0001	0.0002	Q2KE03	92.46						94.9749
25567@20170914_03_MJLorite_iTRAQ.cmpd.rclb.mgf	87.57	420.244	4	0	-0.0011	0	2	YRAR	AAALSMIPTSTGAAK	AVGL	MOD:01485 A1;MOD:01485 K15	0	9080	Q2K4I4	Q2K4I4{202-216}	0	0.0001	0.0002	Q2K4I4	67.12						53.5625
47542@20170914_03_MJLorite_iTRAQ.cmpd.rclb.mgf	152.02	655.115	4	0	0.0086	1	2	TKVK	FTPLSAANRFPALQSGEIDVLAR	NTTW	MOD:01485 F1	0	6573	Q2K902	Q2K902{87-109}	0	0.0001	0.0002	Q2K902	59.17						100.842
34554@20170914_03_MJLorite_iTRAQ.cmpd.rclb.mgf	113.92	676.584	4	0	0.0059	0	2	LNTK	NAGEHPLYWQGPSLGIDYGGQGSR	VMML	MOD:01485 N1	0	2136	Q2K4Y6	Q2K4Y6{100-123}	0	0.0001	0.0002	Q2K4Y6	81.82						68.3583
61651@20170914_03_MJLorite_iTRAQ.cmpd.rclb.mgf	195.98	662.635	4	0	0.0006	0	2	DTMK	LFVFGTPGGSQVNLVALLDNLGK	GASG	MOD:01485 L1;MOD:01485 K23	0	4921	Q2K9W7	Q2K9W7{272-294}	0	0.0001	0.0002	Q2K9W7	69.32						88.902
42303@20170914_03_MJLorite_iTRAQ.cmpd.rclb.mgf	136.67	706.392	4	0	0.0001	0	2	AAAK	SLIGDRPIELEVDGGVTVETAPAIAR	AGGN	MOD:01485 S1	0	1448	Q2K7Y6	Q2K7Y6{163-188}	0	0.0001	0.0002	Q2K7Y6	66.91						72.4436
59873@20170914_03_MJLorite_iTRAQ.cmpd.rclb.mgf	190.63	688.397	4	0	-0.0052	0	2	RTFK	VGPETVLLFHAAAGGVGLIAGQWAK	ALGA	MOD:01485 V1;MOD:01485 K25	0	3174	Q2K8H2	Q2K8H2{139-163}	0	0.0001	0.0002	Q2K8H2	87						85.1413
54847@20170914_03_MJLorite_iTRAQ.cmpd.rclb.mgf	175.18	701.636	4	0	0.0029	0	2	NLRR	SIALSVEDGVVATYIHNAVSDGLGK	LGVL	MOD:01485 S1;MOD:01485 K25	0	6902	Q2K8Y6	Q2K8Y6{142-166}	0	0.0001	0.0002	Q2K8Y6	99.35						120.673
54506@20170914_03_MJLorite_iTRAQ.cmpd.rclb.mgf	174.18	618.563	4	0	0.0008	0	2	AEMK	AECSFVSTDWDGIIPALNAK	KFDM	MOD:00110 C3;MOD:01485 A1;MOD:01485 K20	0	3015	Q2K7J0	Q2K7J0{67-86}	0	0.0001	0.0002	Q2K7J0	73.11						74.2628
36950@20170914_03_MJLorite_iTRAQ.cmpd.rclb.mgf	120.95	686.864	4	0	0.0009	0	2	VVAK	HIFDGSDIAANPANNTLVGTGPFK	FAEH	MOD:01485 H1;MOD:01485 K24	0	10010	Q2K249	Q2K249{180-203}	0	0.0001	0.0002	Q2K249	59.82						101.86
34212@20170914_03_MJLorite_iTRAQ.cmpd.rclb.mgf	112.93	575.569	4	0	-0.0064	0	2	ILVK	VNQIGSLTETLDAVNTAHK	AAYT	MOD:01485 V1;MOD:01485 K19	0	10555	Q2K8W9	Q2K8W9{337-355}	0	0.0001	0.0002	Q2K8W9	60.8						91.6067
42242@20170914_03_MJLorite_iTRAQ.cmpd.rclb.mgf	136.5	764.613	4	0	0.0018	0	2	DKLK	ITPGVQYYSDYGIDGNDFADGDAWK	VGLT	MOD:01485 I1;MOD:01485 K25	0	6045	Q2KAI4	Q2KAI4{275-299}	0	0.0001	0.0002	Q2KAI4	72.73						97.2358
48106@20170914_03_MJLorite_iTRAQ.cmpd.rclb.mgf	153.67	572.303	4	0	0.0024	0	2	GAAK	VDTAYTAMDSAIDVVGEIK	AKLV	MOD:01485 V1;MOD:01485 K19	0	5239	Q2KCF1	Q2KCF1{74-92}	0	0.0001	0.0002	Q2KCF1	63.92						73.2378
53695@20170914_03_MJLorite_iTRAQ.cmpd.rclb.mgf	171.78	1148.3	4	0	0.0101	0	2	GSDR	HTYGFGGQVFTGYNWQAGQIVYGVESDLGYSGDDVSSGGVK	NKYG	MOD:01485 H1;MOD:01485 K41	0	5698	Q2KA52	Q2KA52{68-108}	0	0.0001	0.0002	Q2KA52	74.04						157.544
6350@20170914_03_MJLorite_iTRAQ.cmpd.rclb.mgf	31.15	457.228	4	0	0.0015	1	2	NVLR	TCGRDDQQAEVAAK	YVLK	MOD:00110 C2;MOD:01485 T1;MOD:01485 K14	0	5167	Q2K5M7	Q2K5M7{138-151}	0	0.0001	0.0002	Q2K5M7	61.06						51.4905
36972@20170914_03_MJLorite_iTRAQ.cmpd.rclb.mgf	121.02	570.572	4	0	0.0094	0	2	QTNR	VAYIGSSNIDAGLQAAEIAK	KAMP	MOD:01485 V1;MOD:01485 K20	0	3891	Q2JZ78	Q2JZ78{127-146}	0	0.0001	0.0002	Q2JZ78	62.47						84.1793
24593@20170914_03_MJLorite_iTRAQ.cmpd.rclb.mgf	84.7	640.685	3	0	0.0089	0	2		TSINTNSSAQAALQTLR	NVNQ	MOD:01485 T1	0	5239	Q2KCF1	Q2KCF1{2-18}	0	0.0001	0.0002	Q2KCF1	89.03						108.904
28712@20170914_03_MJLorite_iTRAQ.cmpd.rclb.mgf	96.78	754.029	3	0	0.0138	0	2	STLK	AASLTADQFDSEEGTMSSLR	SMSE	MOD:01485 A1	0	478	Q2K2Q6	Q2K2Q6{168-187}	0	0.0001	0.0002	Q2K2Q6	99.25						118.226
36727@20170914_03_MJLorite_iTRAQ.cmpd.rclb.mgf	120.3	408.747	4	0	-0.0013	0	2	SDNK	ALSAVSDALGLGAAK	VDTA	MOD:01485 A1;MOD:01485 K15	0	5239	Q2K133;Q2KCE9;Q2KCF0	Q2K133{59-73};Q2KCE9{59-73};Q2KCF0{59-73}	0	0.0001	0.0002	Q2K133;Q2KCE9;Q2KCF0	65.63						67.4678
50195@20170914_03_MJLorite_iTRAQ.cmpd.rclb.mgf	159.8	929.213	4	0	0.0012	0	2	NIVK	QLQAAGYGTDLQYGDDDIPNQLSQIENMVTK	GVKV	MOD:01485 Q1;MOD:01485 K31	0	5613	Q2K5F5	Q2K5F5{52-82}	0	0.0001	0.0002	Q2K5F5	76.51						124.567
50646@20170914_03_MJLorite_iTRAQ.cmpd.rclb.mgf	161.15	519.808	4	0	0.0001	0	2	HYQR	LLDYIVPDTVHVLYK	GQVI	MOD:01485 L1;MOD:01485 K15	0	801	Q2K805	Q2K805{209-223}	0	0.0001	0.0002	Q2K805	62.41						66.579
32654@20170914_03_MJLorite_iTRAQ.cmpd.rclb.mgf	108.35	497.291	4	0	-0.0067	0	2	EAMR	HLVVGADLGDVLAHPGK	FWRH	MOD:01485 H1;MOD:01485 K17	0	1989	Q2JZW8	Q2JZW8{71-87}	0	0.0001	0.0002	Q2JZW8	76.85						48.7065
63535@20170914_03_MJLorite_iTRAQ.cmpd.rclb.mgf	202.4	712.153	4	0	-0.003	0	2	KVVR	TALQDAASVASLLITTEAMIAELPK	KDAP	MOD:01485 T1;MOD:01485 K25	0	6161	Q2KBZ7	Q2KBZ7{502-526}	0	0.0001	0.0002	Q2KBZ7	84.53						86.9136
47827@20170914_03_MJLorite_iTRAQ.cmpd.rclb.mgf	152.85	788.399	4	0	0.0211	0	2	DLTK	TTLSSYGLTNNVENLTFIGSGDFAGTGNR	LANT	MOD:01485 T1	0	6947	Q2KC97	Q2KC97{380-408}	0	0.0001	0.0002	Q2KC97	103.92						110.807
58293@20170914_03_MJLorite_iTRAQ.cmpd.rclb.mgf	185.98	515.317	4	0	0.0002	0	2	DGTR	AFIAGVPVWGTLIGLQK	KGRA	MOD:01485 A1;MOD:01485 K17	0	4241	Q2K4A7	Q2K4A7{102-118}	0	0.0001	0.0002	Q2K4A7	59.25						70.3703
54641@20170914_03_MJLorite_iTRAQ.cmpd.rclb.mgf	174.58	779.119	3	0	-0.0046	0	2	TDAK	VDAVLSPYDGLSIGIISSLK	GVGY	MOD:01485 V1;MOD:01485 K20	0	5613	Q2K5F5	Q2K5F5{229-248}	0	0.0001	0.0002	Q2K5F5	79.66						124.518
56009@20170914_03_MJLorite_iTRAQ.cmpd.rclb.mgf	178.78	609.834	4	0	0.0026	1	2	ASGK	SVSDTIKDAIATIGENMNLR	RSIA	MOD:01485 S1;MOD:01485 K7	0	6902	Q2K8Y6	Q2K8Y6{121-140}	0	0.0001	0.0002	Q2K8Y6	62.66						56.4201
58888@20170914_03_MJLorite_iTRAQ.cmpd.rclb.mgf	187.72	924.985	2	0	0.0034	0	2	DGCR	QVGTVEMGEAILAEFK	ALSA	MOD:00040 Q1;MOD:01485 K16	0	2899	Q2K2V0	Q2K2V0{351-366}	0	0.0001	0.0002	Q2K2V0	72.43						112.721
41012@20170914_03_MJLorite_iTRAQ.cmpd.rclb.mgf	132.88	654.866	4	0	-0.0083	0	2	SAGR	TAVGSFNGAFATVPAHELGAAVIK	GALA	MOD:01485 T1;MOD:01485 K24	0	8991	Q2K324	Q2K324{14-37}	0	0.0001	0.0002	Q2K324	95.39						114.225
7416@20170914_03_MJLorite_iTRAQ.cmpd.rclb.mgf	34.27	646.36	2	0	-0.0004	0	2		SNSSVVIASAGR	TAVG	MOD:01485 S1	0	8991	Q2K324	Q2K324{2-13}	0	0.0001	0.0002	Q2K324	79.83						169.12
49239@20170914_03_MJLorite_iTRAQ.cmpd.rclb.mgf	157	596.836	4	0	0.0024	0	2	EERR	QVIDFTIPYAATPAAFATAK	DSPL	MOD:01485 Q1;MOD:01485 K20	0	1971	Q2K072	Q2K072{102-121}	0	0.0001	0.0002	Q2K072	69.58						78.2916
51860@20170914_03_MJLorite_iTRAQ.cmpd.rclb.mgf	164.8	1238.61	3	0	-0.0034	0	2	NIVK	QLQAAGYGTDLQYGDDDIPNQLSQIENMVTK	GVKV	MOD:01485 Q1;MOD:01485 K31	0	5613	Q2K5F5	Q2K5F5{52-82}	0	0.0001	0.0002	Q2K5F5	78.54						141.588
50807@20170914_03_MJLorite_iTRAQ.cmpd.rclb.mgf	161.62	727.64	4	1	0.0023	0	2	EVQR	LQAAEPVALDQMVGMASTGYLPVEK	RAEV	MOD:01485 L1;MOD:01485 K25	0	5084	Q2K7U8	Q2K7U8{155-179}	0	0.0001	0.0002	Q2K7U8	93.81						104.424
55463@20170914_03_MJLorite_iTRAQ.cmpd.rclb.mgf	176.98	1111.54	3	0	0.0141	0	2	FGDK	LDGNLWTVAESGGNEYVVTNPYNPFFER	VDGK	MOD:01485 L1	0	6636	Q2K890	Q2K890{153-180}	0	0.0001	0.0002	Q2K890	94.05						151.681
52196@20170914_03_MJLorite_iTRAQ.cmpd.rclb.mgf	165.97	718.41	3	0	0.0109	0	2	DANK	IVWLTPSPANNTWALAVR	NDVA	MOD:01485 I1	0	8956	Q2KCY0	Q2KCY0{115-132}	0	0.0001	0.0002	Q2KCY0	59.55						86.6784
45466@20170914_03_MJLorite_iTRAQ.cmpd.rclb.mgf	145.95	493.88	5	0	0.0053	0	2	PNIR	DGAAIAFAHGLNVHFGLIEPK	ASVD	MOD:01485 D1;MOD:01485 K21	0	6117	Q2K6M2	Q2K6M2{100-120}	0	0.0001	0.0002	Q2K6M2	73.09						46.6
55076@20170914_03_MJLorite_iTRAQ.cmpd.rclb.mgf	175.87	534.057	4	0	0.002	0	2	HMAK	VAFIGLGVMGFPMAGHLK	TKGG	MOD:01485 V1;MOD:01485 K18	0	5929	Q2K7H5	Q2K7H5{152-169}	0	0.0001	0.0002	Q2K7H5	63.36						61.0888
47987@20170914_03_MJLorite_iTRAQ.cmpd.rclb.mgf	153.33	572.303	4	0	0.0006	0	2	GAAK	VDTAYTAMDSAIDVVGEIK	AKLV	MOD:01485 V1;MOD:01485 K19	0	5239	Q2KCF1	Q2KCF1{74-92}	0	0.0001	0.0002	Q2KCF1	59.96						70.2287
34873@20170914_03_MJLorite_iTRAQ.cmpd.rclb.mgf	114.87	560.794	4	0	0.0048	0	2	AAGK	DLFAQDLVGGAEEGHALPTR	VITE	MOD:01485 D1	0	7556	Q2KE66	Q2KE66{106-125}	0	0.0001	0.0002	Q2KE66	71.56						75.7251
53548@20170914_03_MJLorite_iTRAQ.cmpd.rclb.mgf	171.37	654.357	4	0	0.0048	0	2	TLGR	AAIYPAGSWEIALFNTQAQFK	MGAF	MOD:01485 A1;MOD:01485 K21	0	8161	Q2K670	Q2K670{259-279}	0	0.0001	0.0002	Q2K670	61.51						80.7129
56229@20170914_03_MJLorite_iTRAQ.cmpd.rclb.mgf	179.88	584.593	4	0	0.0024	0	2	TDAK	VDAVLSPYDGLSIGIISSLK	GVGY	MOD:01485 V1;MOD:01485 K20	0	5613	Q2K5F5	Q2K5F5{229-248}	0	0.0001	0.0002	Q2K5F5	71.58						74.7909
25936@20170914_03_MJLorite_iTRAQ.cmpd.rclb.mgf	88.65	522.035	4	0	0.0019	0	2	QANR	LSTVSDNIANVNTTGYK	AVST	MOD:01485 L1;MOD:01485 K17	0	1654	Q2KCE1	Q2KCE1{21-37}	0	0.0001	0.0002	Q2KCE1	71.73						78.1653
61710@20170914_03_MJLorite_iTRAQ.cmpd.rclb.mgf	196.17	697.394	3	0	0.0011	0	2	RRQR	ISVVPGVLMFGMVQEALR	FSTL	MOD:01485 I1	0	8390	Q2JYI2	Q2JYI2{246-263}	0	0.0001	0.0002	Q2JYI2	71.75						95.3343
53851@20170914_03_MJLorite_iTRAQ.cmpd.rclb.mgf	172.27	661.886	4	0	-0.0003	0	2	EHAK	VIGGSADGVVVGTAIVNQVATSLTK	DGKA	MOD:01485 V1;MOD:01485 K25	0	6394	Q2KE81	Q2KE81{223-247}	0	0.0001	0.0002	Q2KE81	106.36						118.538
51641@20170914_03_MJLorite_iTRAQ.cmpd.rclb.mgf	164.17	929.215	4	0	0.0077	0	2	NIVK	QLQAAGYGTDLQYGDDDIPNQLSQIENMVTK	GVKV	MOD:01485 Q1;MOD:01485 K31	0	5613	Q2K5F5	Q2K5F5{52-82}	0	0.0001	0.0002	Q2K5F5	119.34						120.936
54048@20170914_03_MJLorite_iTRAQ.cmpd.rclb.mgf	172.83	851.169	4	0	-0.0024	0	2	DIFK	AMSEGESNATVELTPNMAGPAFDALDAYLK	DKKA	MOD:01485 A1;MOD:01485 K30	0	9273	Q2K8G7	Q2K8G7{257-286}	0	0.0001	0.0002	Q2K8G7	86.65						114.42
51722@20170914_03_MJLorite_iTRAQ.cmpd.rclb.mgf	164.42	732.665	4	0	0.0018	0	2	YLVK	GAVSNAINMPSITAEEAPILKPFIR	LADV	MOD:01485 G1;MOD:01485 K21	0	8774	Q2K4M6	Q2K4M6{308-332}	0	0.0001	0.0002	Q2K4M6	87.58						61.6615
59224@20170914_03_MJLorite_iTRAQ.cmpd.rclb.mgf	188.7	591.835	4	0	0.0012	0	2	MAEK	GQPDIAPEAWIDLLPDVVK	KGTE	MOD:01485 G1;MOD:01485 K19	0	9385	Q2JYN6	Q2JYN6{76-94}	0	0.0001	0.0002	Q2JYN6	67.13						71.0091
41899@20170914_03_MJLorite_iTRAQ.cmpd.rclb.mgf	135.48	583.814	4	0	-0.0029	0	2	RTIK	APDDLYLTAVTSDLVHEGK	VAGD	MOD:01485 A1;MOD:01485 K19	0	9273	Q2K8G7	Q2K8G7{118-136}	0	0.0001	0.0002	Q2K8G7	59.61						69.2701
31567@20170914_03_MJLorite_iTRAQ.cmpd.rclb.mgf	105.17	405.243	4	0	-0.0001	0	2	SDNK	ALSAVSDALGVGAAK	VDTA	MOD:01485 A1;MOD:01485 K15	0	5239	Q2KCF1	Q2KCF1{59-73}	0	0.0001	0.0002	Q2KCF1	63.14						66.9283
44634@20170914_03_MJLorite_iTRAQ.cmpd.rclb.mgf	143.52	618.065	4	0	0.0027	0	2	PWNK	YVEGGSYEYAAGMGFPELIK	SVEK	MOD:01485 Y1;MOD:01485 K20	0	474	Q2KC86	Q2KC86{130-149}	0	0.0001	0.0002	Q2KC86	71.73						84.3673
53876@20170914_03_MJLorite_iTRAQ.cmpd.rclb.mgf	172.33	579.803	4	0	-0.0066	0	2	GAAK	VDTAYSAMDSAIDVISEIK	AKIV	MOD:01485 V1;MOD:01485 K19	0	5239	Q2KCE9	Q2KCE9{74-92}	0	0.0001	0.0002	Q2KCE9	98.58						77.1124
50738@20170914_03_MJLorite_iTRAQ.cmpd.rclb.mgf	161.42	661.344	4	0	0.0014	0	2	GFLK	DASLTDPSLVESDFAEAGLAFAK	DADG	MOD:01485 D1;MOD:01485 K23	0	376	Q2JZJ7	Q2JZJ7{126-148}	0	0.0001	0.0002	Q2JZJ7	101.79						92.5408
31866@20170914_03_MJLorite_iTRAQ.cmpd.rclb.mgf	106.03	1168.11	2	0	0.0094	0	2	KKHK	AVAEIPEGAVIGVPNDPSNEGR	ALRV	MOD:01485 A1	0	5940	Q2K283	Q2K283{133-154}	0	0.0001	0.0002	Q2K283	67						131.332
51100@20170914_03_MJLorite_iTRAQ.cmpd.rclb.mgf	162.47	694.874	4	0	0.0061	0	2	AAAR	GETALGIVFMHDAVAQTAEGFPVK	SVAP	MOD:01485 G1;MOD:01485 K24	0	638	Q2K8C6	Q2K8C6{217-240}	0	0.0001	0.0002	Q2K8C6	73.06						104.26
35172@20170914_03_MJLorite_iTRAQ.cmpd.rclb.mgf	115.73	569.293	4	0	0.0016	0	2	NPIK	ISLEGFTGAYDGEPVSESK	LADT	MOD:01485 I1;MOD:01485 K19	0	6893	Q2K8F2	Q2K8F2{166-184}	0	0.0001	0.0002	Q2K8F2	83.71						71.5324
51279@20170914_03_MJLorite_iTRAQ.cmpd.rclb.mgf	163.05	929.215	4	0	0.0061	0	2	NIVK	QLQAAGYGTDLQYGDDDIPNQLSQIENMVTK	GVKV	MOD:01485 Q1;MOD:01485 K31	0	5613	Q2K5F5	Q2K5F5{52-82}	0	0.0001	0.0002	Q2K5F5	122.84						114.385
43012@20170914_03_MJLorite_iTRAQ.cmpd.rclb.mgf	138.77	622.809	4	0	0.0025	0	2	GLPK	HYQAALTDACAFANTNMLAK	YDMK	MOD:00110 C10;MOD:01485 H1;MOD:01485 K20	0	2578	Q2K462	Q2K462{263-282}	0	0.0001	0.0002	Q2K462	85.01						81.8504
50136@20170914_03_MJLorite_iTRAQ.cmpd.rclb.mgf	159.65	540.825	4	0	-0.005	0	2	KGVK	VLVIASIDGTTLSDVLQK	AHDA	MOD:01485 V1;MOD:01485 K18	0	5613	Q2K5F5	Q2K5F5{86-103}	0	0.0001	0.0002	Q2K5F5	59.04						65.6437
42185@20170914_03_MJLorite_iTRAQ.cmpd.rclb.mgf	136.32	706.392	4	0	0.0005	0	2	AAAK	SLIGDRPIELEVDGGVTVETAPAIAR	AGGN	MOD:01485 S1	0	1448	Q2K7Y6	Q2K7Y6{163-188}	0	0.0001	0.0002	Q2K7Y6	65.88						76.9256
36369@20170914_03_MJLorite_iTRAQ.cmpd.rclb.mgf	119.25	500.515	4	0	0.0007	0	2	ALEK	GTIDAAEFVGPYDDLK	LGFH	MOD:01485 G1;MOD:01485 K16	0	2578	Q2K462	Q2K462{211-226}	0	0.0001	0.0002	Q2K462	68.54						61.159
40566@20170914_03_MJLorite_iTRAQ.cmpd.rclb.mgf	131.57	766.42	4	0	0.0092	0	2	EFAK	FITSPDVQAEYELQGGAGLTPLRPSK	KVDE	MOD:01485 F1;MOD:01485 K26	0	3023	Q2K111	Q2K111{309-334}	0	0.0001	0.0002	Q2K111	77.72						81.9953
58659@20170914_03_MJLorite_iTRAQ.cmpd.rclb.mgf	187.05	698.862	4	0	0.0119	0	2	LAPR	LAADLYGLEIVAENVEDTENNVTR	FVIL	MOD:01485 L1	0	10400	Q2KDY0	Q2KDY0{153-176}	0	0.0001	0.0002	Q2KDY0	91.69						75.7583
32621@20170914_03_MJLorite_iTRAQ.cmpd.rclb.mgf	108.25	562.558	4	0	0.0023	0	2	RMSK	GTNVQDWNQATNLVITGK	AGGQ	MOD:01485 G1;MOD:01485 K18	0	2233	Q2K7E8	Q2K7E8{239-256}	0	0.0001	0.0002	Q2K7E8	65.76						77.9991
56471@20170914_03_MJLorite_iTRAQ.cmpd.rclb.mgf	180.62	710.368	4	0	0.0035	0	2	EKFK	AAGFNPEAYTLYSYAAMQAIAGAAK	AAGS	MOD:01485 A1;MOD:01485 K25	0	3055	Q2K502	Q2K502{289-313}	0	0.0001	0.0002	Q2K502	76.23						100.323
48080@20170914_03_MJLorite_iTRAQ.cmpd.rclb.mgf	153.6	689.851	4	0	0.0029	1	2	AGEK	ADDGTLLGMNFYVEGVDDKLPAQ		MOD:01485 A1;MOD:01485 K19	0	10500	Q2K8G8	Q2K8G8{336-358}	0	0.0001	0.0002	Q2K8G8	67.8						80.9967
35719@20170914_03_MJLorite_iTRAQ.cmpd.rclb.mgf	117.33	645.349	3	0	0.0033	0	2		TSINTNNAAMAALQTLR	GINQ	MOD:01485 T1	0	5239	Q2KCF0	Q2KCF0{2-18}	0	0.0001	0.0002	Q2KCF0	93.66						108.904
43830@20170914_03_MJLorite_iTRAQ.cmpd.rclb.mgf	141.15	685.868	4	0	-0.004	0	2	REFR	AGAANETVDINAIPADAMVLDVGPK	SVEA	MOD:01485 A1;MOD:01485 K25	0	9884	Q2K4I1	Q2K4I1{294-318}	0	0.0001	0.0002	Q2K4I1	76.62						96.4584
38346@20170914_03_MJLorite_iTRAQ.cmpd.rclb.mgf	125.02	996.999	2	0	0.0077	0	2		SSYDYDLFVIGGGSGGVR	AARV	MOD:01485 S1	0	8461	Q2K7M9	Q2K7M9{2-19}	0	0.0001	0.0002	Q2K7M9	67.79						151.803
61626@20170914_03_MJLorite_iTRAQ.cmpd.rclb.mgf	195.92	736.915	4	0	0.0021	0	2	KALR	SFIAQGVDAILIAPVVETGWDDVLK	EAKE	MOD:01485 S1;MOD:01485 K25	0	9273	Q2K8G7	Q2K8G7{76-100}	0	0.0001	0.0002	Q2K8G7	109.03						92.8529
49963@20170914_03_MJLorite_iTRAQ.cmpd.rclb.mgf	159.13	638.339	4	0	-0.0015	1	2	SISK	RIELQENFVSALSDSIDSGIGR	LVDA	MOD:01485 R1	0	5239	Q2KCF0	Q2KCF0{238-259}	0	0.0001	0.0002	Q2KCF0	68.15						63.4929
50386@20170914_03_MJLorite_iTRAQ.cmpd.rclb.mgf	160.38	707.363	4	0	-0.0017	0	2	VVRK	AITAGEIDIYPEYTGNAGFFFNK	ADDA	MOD:01485 A1;MOD:01485 K23	0	8956	Q2KCY0	Q2KCY0{67-89}	0	0.0001	0.0002	Q2KCY0	91.08						94.8186
44353@20170914_03_MJLorite_iTRAQ.cmpd.rclb.mgf	142.68	911.205	4	0	0.0069	1	2	GNVK	VSDGTSDESKTNYGYTVGAGVEAFVTNNITTR	LEYR	MOD:01485 V1;MOD:01485 K10	0	5698	Q2KA52	Q2KA52{143-174}	0	0.0001	0.0002	Q2KA52	71.72						104.235
55325@20170914_03_MJLorite_iTRAQ.cmpd.rclb.mgf	176.58	754.775	3	1	-0.016	0	2	NTGR	IIAGGVAAGVVGGLIGGAIANGGPR	YVDE	MOD:01485 I1	0	8825	Q2K013	Q2K013{36-60}	0	0.0001	0.0002	Q2K013	62.51						113.276
58346@20170914_03_MJLorite_iTRAQ.cmpd.rclb.mgf	186.12	906.176	3	0	-0.0032	1	2	IQKK	FLANSPFVIIFQQTEVAGYRK	NLKD	MOD:01485 F1;MOD:01485 K21	0	3376	Q2K350	Q2K350{505-525}	0	0.0001	0.0002	Q2K350	67.1						83.8454
24639@20170914_03_MJLorite_iTRAQ.cmpd.rclb.mgf	84.83	480.764	4	0	0.0019	0	2		TSINTNSSAQAALQTLR	NVNQ	MOD:01485 T1	0	5239	Q2KCF1	Q2KCF1{2-18}	0	0.0001	0.0002	Q2KCF1	64.68						66.1892
49930@20170914_03_MJLorite_iTRAQ.cmpd.rclb.mgf	159.03	592.557	4	0	-0.0001	1	2	ADLK	GQPLTIFGPWRGEDEAFFR	SVLA	MOD:01485 G1	0	4702	Q2KCC4	Q2KCC4{51-69}	0	0.0001	0.0002	Q2KCC4	63.47						65.8968
51290@20170914_03_MJLorite_iTRAQ.cmpd.rclb.mgf	163.08	743.573	5	0	0.0046	0	2	NIVK	QLQAAGYGTDLQYGDDDIPNQLSQIENMVTK	GVKV	MOD:01485 Q1;MOD:01485 K31	0	5613	Q2K5F5	Q2K5F5{52-82}	0	0.0001	0.0002	Q2K5F5	84.88						88.1362
50008@20170914_03_MJLorite_iTRAQ.cmpd.rclb.mgf	159.27	861.422	3	0	0.019	0	2	SGAR	LPDPFAVATQYAFNPDNSDEAR	LGSY	MOD:01485 L1	0	7348	Q2JZ57	Q2JZ57{422-443}	0	0.0001	0.0002	Q2JZ57	73.93						123.248
59967@20170914_03_MJLorite_iTRAQ.cmpd.rclb.mgf	190.92	767.398	5	0	0.0107	0	2	DQNK	FIAPVVGYYSDTSGNVLSLPFNSSTPIMYYNK	DVFK	MOD:01485 F1;MOD:01485 K32	0	7374	Q2K1C6	Q2K1C6{121-152}	0	0.0001	0.0002	Q2K1C6	68.23						105.068
8132@20170914_03_MJLorite_iTRAQ.cmpd.rclb.mgf	36.37	613.556	4	0	-0.0001	0	2		AVDATSSVTSSTSTSSSSSAQSK	ATLN	MOD:01485 A1;MOD:01485 K23	0	4239	Q2KCD6	Q2KCD6{2-24}	0	0.0001	0.0002	Q2KCD6	76.55						86.1527
48969@20170914_03_MJLorite_iTRAQ.cmpd.rclb.mgf	156.22	552.805	4	0	0.011	0	2	QYPK	SQDAAYVQYLIGLTYSK	QIVD	MOD:01485 S1;MOD:01485 K17	0	2784	Q2K6D0	Q2K6D0{120-136}	0	0.0001	0.0002	Q2K6D0	61.38						67.1365
43866@20170914_03_MJLorite_iTRAQ.cmpd.rclb.mgf	141.27	807.418	3	0	0.0103	0	2	HPVR	IATVVNFPAGDMEVADVAAETR	EAIA	MOD:01485 I1	0	5146	Q2KDR9	Q2KDR9{70-91}	0	0.0001	0.0002	Q2KDR9	77.35						122.862
54377@20170914_03_MJLorite_iTRAQ.cmpd.rclb.mgf	173.8	884.489	3	1	-0.0137	0	2	PNTK	VFFLESPTNPTLEVVDISGVAK	LANQ	MOD:01485 V1;MOD:01485 K22	0	8618	Q2KCU5	Q2KCU5{149-170}	0	0.0001	0.0002	Q2KCU5	66.18						128.394
44349@20170914_03_MJLorite_iTRAQ.cmpd.rclb.mgf	142.67	834.433	3	0	0.0122	0	2	QTLK	TANPSVPVMTLDADLAAEDSALR	KTYL	MOD:01485 T1	0	321	Q2K5C9	Q2K5C9{106-128}	0	0.0001	0.0002	Q2K5C9	73.87						121.046
46191@20170914_03_MJLorite_iTRAQ.cmpd.rclb.mgf	148.08	607.579	4	0	0.0044	0	2	PLAR	IVSWATAGVDPSIMGTGPIPASR	KALE	MOD:01485 I1	0	8991	Q2K324	Q2K324{276-298}	0	0.0001	0.0002	Q2K324	74.93						87.9958
56694@20170914_03_MJLorite_iTRAQ.cmpd.rclb.mgf	181.27	855.257	5	0	0.0152	0	2	VDAK	YSSSENYEQQIVIDTQAGSPPNVAILPQPGLLADLAGK	GFLT	MOD:01485 Y1;MOD:01485 K38	0	4702	Q2KCC4	Q2KCC4{85-122}	0	0.0001	0.0002	Q2KCC4	64.47						98.6536
60108@20170914_03_MJLorite_iTRAQ.cmpd.rclb.mgf	191.32	1228.17	2	1	-0.0123	0	2	RVAR	LLDAQLTTFGQIVDASYLVSR	LRLI	MOD:01485 L1	0	9001	Q2K5U8	Q2K5U8{128-148}	0	0.0001	0.0002	Q2K5U8	66.2						140.66
55926@20170914_03_MJLorite_iTRAQ.cmpd.rclb.mgf	178.47	913.119	3	0	0.0047	0	2	FHVK	ADGSFTYDLTADLDAGVTYTEVLR	YYKI	MOD:01485 A1	0	201	Q2K1Q3	Q2K1Q3{184-207}	0	0.0001	0.0002	Q2K1Q3	112.26						143.13
39593@20170914_03_MJLorite_iTRAQ.cmpd.rclb.mgf	128.72	581.551	4	0	-0.0002	0	2	ITGK	AGGQIMGDWAQGEFALAGQK	AGTD	MOD:01485 A1;MOD:01485 K20	0	2233	Q2K7E8	Q2K7E8{257-276}	0	0.0001	0.0002	Q2K7E8	81.42						75.4007
41925@20170914_03_MJLorite_iTRAQ.cmpd.rclb.mgf	135.55	1029.51	3	0	0.0128	0	2	GDTR	NYDIAGNYIHDGAWGVAVSAAGTTTYVR	EGIE	MOD:01485 N1	0	3818	Q2K709	Q2K709{275-302}	0	0.0001	0.0002	Q2K709	81.7						144.485
60886@20170914_03_MJLorite_iTRAQ.cmpd.rclb.mgf	193.6	1135.31	3	0	0.0296	0	2	ESSK	LSALQTQQQLAIQSLSIANSSSQNILSLFR	G	MOD:01485 L1	0	5239	Q2K133	Q2K133{272-301}	0	0.0001	0.0002	Q2K133	72.63						126.527
39092@20170914_03_MJLorite_iTRAQ.cmpd.rclb.mgf	127.2	880.44	3	0	0.0137	0	2	NQLR	SIVDQGQSISFSMGNADDVLQQR	FQSY	MOD:01485 S1	0	478	Q2K2Q6	Q2K2Q6{108-130}	0	0.0001	0.0002	Q2K2Q6	110.7						128.343
43877@20170914_03_MJLorite_iTRAQ.cmpd.rclb.mgf	141.3	527.037	4	0	0.0021	0	2	AGPK	AQLTAIVDTWGTYYSK	RVHA	MOD:01485 A1;MOD:01485 K16	0	10500	Q2K8G8	Q2K8G8{247-262}	0	0.0001	0.0002	Q2K8G8	60.47						56.1292
54806@20170914_03_MJLorite_iTRAQ.cmpd.rclb.mgf	175.07	501.02	4	0	-0.0004	0	2	MPGK	IGAGAFWTGMVDFVGGK	SAEE	MOD:01485 I1;MOD:01485 K17	0	4702	Q2KCC4	Q2KCC4{420-436}	0	0.0001	0.0002	Q2KCC4	77.88						69.8195
64794@20170914_03_MJLorite_iTRAQ.cmpd.rclb.mgf	209.75	906.47	4	1	0.0162	0	2	RLIR	DSANVDYYATFDNFQVGVLQANSIVDGLGLK	DGKG	MOD:01485 D1;MOD:01485 K31	0	5613	Q2K5F5	Q2K5F5{120-150}	0	0.0001	0.0002	Q2K5F5	97.99						121.287
59105@20170914_03_MJLorite_iTRAQ.cmpd.rclb.mgf	188.35	650.884	4	0	0.0024	0	2	ANPK	LVGVFASNLILAQGVGQAIAENK	LGDK	MOD:01485 L1;MOD:01485 K23	0	8759	Q2KCX3	Q2KCX3{224-246}	0	0.0001	0.0002	Q2KCX3	99.13						78.4101
62193@20170914_03_MJLorite_iTRAQ.cmpd.rclb.mgf	197.58	735.391	4	0	0.0054	0	2	IIQR	AASVEEIANLVTYLASPLASATTGASMR	VDGG	MOD:01485 A1	0	8138	Q2KBC9	Q2KBC9{227-254}	0	0.0001	0.0002	Q2KBC9	106.98						91.8511
20770@20170914_03_MJLorite_iTRAQ.cmpd.rclb.mgf	73.48	504.019	4	0	0.0068	0	2	SEVK	LSEAAAGNLTYGEETAK	SLKL	MOD:01485 L1;MOD:01485 K17	0	4642	Q2K4R4	Q2K4R4{297-313}	0	0.0001	0.0002	Q2K4R4	66.66						73.7819
32496@20170914_03_MJLorite_iTRAQ.cmpd.rclb.mgf	107.88	975.512	2	0	-0.0079	0	2		TSINTNNAAMAALQTLR	GINQ	MOD:01485 T1;MOD:00719 M10	0	5239	Q2KCF0	Q2KCF0{2-18}	0	0.0001	0.0002	Q2KCF0	102.58						150.498
24926@20170914_03_MJLorite_iTRAQ.cmpd.rclb.mgf	85.67	640.684	3	0	0.0064	0	2		TSINTNSSAQAALQTLR	NVNQ	MOD:01485 T1	0	5239	Q2KCF1	Q2KCF1{2-18}	0	0.0001	0.0002	Q2KCF1	100.06						106.129
39666@20170914_03_MJLorite_iTRAQ.cmpd.rclb.mgf	128.92	689.885	4	0	0.0024	0	2	SSLK	GVGYGTAAQPLPIVTGQDAEIPSVK	SIIA	MOD:01485 G1;MOD:01485 K25	0	5613	Q2K5F5	Q2K5F5{249-273}	0	0.0001	0.0002	Q2K5F5	85.09						97.1614
44394@20170914_03_MJLorite_iTRAQ.cmpd.rclb.mgf	142.82	634.101	4	0	0.0009	0	2	ESGR	TDIEVVAINDLGPVETNAHLLR	YDSI	MOD:01485 T1	0	9080	Q2K4I4	Q2K4I4{27-48}	0	0.0001	0.0002	Q2K4I4	63.19						75.4474
38863@20170914_03_MJLorite_iTRAQ.cmpd.rclb.mgf	126.53	593.304	5	0	0.0058	0	2	VVKK	SFGTNAGLFNNAAQHYNHIHFWK	WMKK	MOD:01485 S1;MOD:01485 K23	0	3834	Q2KAX8	Q2KAX8{60-82}	0	0.0001	0.0002	Q2KAX8	67.56						97.2998
41391@20170914_03_MJLorite_iTRAQ.cmpd.rclb.mgf	134	595.591	4	0	0.0116	0	2	DQQK	LNVQASEPVAINNTFVLIHR	SEEN	MOD:01485 L1	0	6989	Q2K0L8	Q2K0L8{212-231}	0	0.0001	0.0002	Q2K0L8	71.71						67.6362
35447@20170914_03_MJLorite_iTRAQ.cmpd.rclb.mgf	116.55	645.349	3	0	0.0031	0	2		TSINTNNAAMAALQTLR	GINQ	MOD:01485 T1	0	5239	Q2KCF0	Q2KCF0{2-18}	0	0.0001	0.0002	Q2KCF0	93.95						108.903
56800@20170914_03_MJLorite_iTRAQ.cmpd.rclb.mgf	181.58	695.143	4	0	0.0054	0	2	KSVK	EGVIGATSQQYPLLMASLGIEAIK	KFAD	MOD:01485 E1;MOD:01485 K24	0	5517	Q2KD00	Q2KD00{269-292}	0	0.0001	0.0002	Q2KD00	82.49						116.021
59200@20170914_03_MJLorite_iTRAQ.cmpd.rclb.mgf	188.63	650.884	4	0	0.0025	0	2	ANPK	LVGVFASNLILAQGVGQAIAENK	LGDK	MOD:01485 L1;MOD:01485 K23	0	8759	Q2KCX3	Q2KCX3{224-246}	0	0.0001	0.0002	Q2KCX3	116.05						79.1301
24992@20170914_03_MJLorite_iTRAQ.cmpd.rclb.mgf	85.87	653.091	4	0	0.0108	0	2	FLTK	QVDANNGAVTDVQGTYGTFHVK	ADGS	MOD:01485 Q1;MOD:01485 K22	0	201	Q2K1Q3	Q2K1Q3{162-183}	0	0.0001	0.0002	Q2K1Q3	109.52						70.0188
54269@20170914_03_MJLorite_iTRAQ.cmpd.rclb.mgf	173.48	643.873	4	0	0.0025	0	2	DPAK	ADAIGGFLVENGILVDANGVVLK	EKPD	MOD:01485 A1;MOD:01485 K23	0	9495	Q2K3H4	Q2K3H4{299-321}	0	0.0001	0.0002	Q2K3H4	68.3						93.1693
50823@20170914_03_MJLorite_iTRAQ.cmpd.rclb.mgf	161.65	929.215	4	0	0.0062	0	2	NIVK	QLQAAGYGTDLQYGDDDIPNQLSQIENMVTK	GVKV	MOD:01485 Q1;MOD:01485 K31	0	5613	Q2K5F5	Q2K5F5{52-82}	0	0.0001	0.0002	Q2K5F5	80.07						126.104
46551@20170914_03_MJLorite_iTRAQ.cmpd.rclb.mgf	149.13	598.347	4	0	0.0043	0	2	TPGR	SVLIEPTSGNTGIALAFAAAAK	GYRL	MOD:01485 S1;MOD:01485 K22	0	1546	Q2KDD9	Q2KDD9{75-96}	0	0.0001	0.0002	Q2KDD9	93.31						85.84
36907@20170914_03_MJLorite_iTRAQ.cmpd.rclb.mgf	120.83	408.747	4	0	-0.0007	0	2	SDNK	ALSAVSDALGLGAAK	VDTA	MOD:01485 A1;MOD:01485 K15	0	5239	Q2K133;Q2KCE9;Q2KCF0	Q2K133{59-73};Q2KCE9{59-73};Q2KCF0{59-73}	0	0.0001	0.0002	Q2K133;Q2KCE9;Q2KCF0	64						67.3222
39642@20170914_03_MJLorite_iTRAQ.cmpd.rclb.mgf	128.85	880.442	3	0	0.021	0	2	NQLR	SIVDQGQSISFSMGNADDVLQQR	FQSY	MOD:01485 S1	0	478	Q2K2Q6	Q2K2Q6{108-130}	0	0.0001	0.0002	Q2K2Q6	67.39						112.442
53007@20170914_03_MJLorite_iTRAQ.cmpd.rclb.mgf	169.78	625.857	4	0	0.0076	0	2	PKVK	TIGYLYNSGEANSVSLLAVLK	AEAE	MOD:01485 T1;MOD:01485 K21	0	5726	Q2K3B2	Q2K3B2{156-176}	0	0.0001	0.0002	Q2K3B2	90.13						88.5574
44937@20170914_03_MJLorite_iTRAQ.cmpd.rclb.mgf	144.4	645.369	3	0	0.001	0	2		TSILTNVAAMAALQTLR	GIND	MOD:01485 T1;MOD:00719 M10	0	5239	Q2KCE9	Q2KCE9{2-18}	0	0.0001	0.0002	Q2KCE9	77.96						106.598
24899@20170914_03_MJLorite_iTRAQ.cmpd.rclb.mgf	85.58	653.091	4	0	0.0108	0	2	FLTK	QVDANNGAVTDVQGTYGTFHVK	ADGS	MOD:01485 Q1;MOD:01485 K22	0	201	Q2K1Q3	Q2K1Q3{162-183}	0	0.0001	0.0002	Q2K1Q3	79.22						77.9836
59910@20170914_03_MJLorite_iTRAQ.cmpd.rclb.mgf	190.73	800.413	4	0	0.0033	0	2	VVGK	AAPFAQGSTPIIVAWDYNAMSWGESLK	GNPP	MOD:01485 A1;MOD:01485 K27	0	2394	Q2K678	Q2K678{228-254}	0	0.0001	0.0002	Q2K678	97.02						99.3704
61010@20170914_03_MJLorite_iTRAQ.cmpd.rclb.mgf	193.97	642.352	4	0	-0.0035	0	2	QGLK	APLDGAPYLYAAQTLVDWVSK	GYIS	MOD:01485 A1;MOD:01485 K21	0	898	Q2K239	Q2K239{224-244}	0	0.0001	0.0002	Q2K239	80.65						88.1524
63010@20170914_03_MJLorite_iTRAQ.cmpd.rclb.mgf	200.4	626.587	4	0	-0.0006	0	2	TVDK	AYAPSFVLNCLTATVASVVDK	KLVL	MOD:00110 C10;MOD:01485 Y2;MOD:01485 K21	0	3376	Q2K350	Q2K350{167-187}	0	0.0001	0.0002	Q2K350	96.27						102.683
62915@20170914_03_MJLorite_iTRAQ.cmpd.rclb.mgf	199.72	731.392	4	0	0.005	0	2	LTVK	FTLNHPEAPFLADLAMDFASIVSK	EYAD	MOD:01485 F1;MOD:01485 K24	0	474	Q2KC86	Q2KC86{161-184}	0	0.0001	0.0002	Q2KC86	70.35						74.2803
54579@20170914_03_MJLorite_iTRAQ.cmpd.rclb.mgf	174.4	747.892	4	0	0.0054	0	2	HGKR	NAALIGAGIGALAGGAIGNYMDQQEAELR	AQLE	MOD:01485 N1	0	998	Q2K6F8	Q2K6F8{60-88}	0	0.0001	0.0002	Q2K6F8	102.17						111.386
54002@20170914_03_MJLorite_iTRAQ.cmpd.rclb.mgf	172.7	687.375	4	0	0.0014	0	2	RGLK	NANTPVWTTLLLGYGSSPLGPDGK	LRTT	MOD:01485 N1;MOD:01485 K24	0	376	Q2JZJ7	Q2JZJ7{211-234}	0	0.0001	0.0002	Q2JZJ7	82.61						90.673
40188@20170914_03_MJLorite_iTRAQ.cmpd.rclb.mgf	130.47	518.31	3	0	0.0048	0	2	EHLR	LIFVEMGAASVK	TGVH	MOD:01485 L1;MOD:01485 K12	0	1059	Q2K339	Q2K339{125-136}	0	0.0001	0.0002	Q2K339	59.2						84.2237
42312@20170914_03_MJLorite_iTRAQ.cmpd.rclb.mgf	136.7	911.205	4	0	0.0085	1	2	GNVK	VSDGTSDESKTNYGYTVGAGVEAFVTNNITTR	LEYR	MOD:01485 V1;MOD:01485 Y15	0	5698	Q2KA52	Q2KA52{143-174}	0	0.0001	0.0002	Q2KA52	77.95						136.942
53788@20170914_03_MJLorite_iTRAQ.cmpd.rclb.mgf	172.08	579.803	4	0	-0.0066	0	2	GAAK	VDTAYSAMDSAIDVISEIK	AKIV	MOD:01485 V1;MOD:01485 K19	0	5239	Q2KCE9	Q2KCE9{74-92}	0	0.0001	0.0002	Q2KCE9	99.19						72.4809
55110@20170914_03_MJLorite_iTRAQ.cmpd.rclb.mgf	175.97	634.849	4	0	0.0061	0	2	AFMR	NSGEGIPLLLDAGHLAFAGGDVLR	AIDN	MOD:01485 N1	0	4354	Q2KAJ0	Q2KAJ0{172-195}	0	0.0001	0.0002	Q2KAJ0	82.25						89.901
62535@20170914_03_MJLorite_iTRAQ.cmpd.rclb.mgf	198.58	838.815	3	1	-0.0223	0	2	VSSK	IDTEGTLLGNVIALALEANGIK	TQDR	MOD:01485 I1;MOD:01485 K22	0	8956	Q2KCY0	Q2KCY0{30-51}	0	0.0001	0.0002	Q2KCY0	103.58						143.058
54450@20170914_03_MJLorite_iTRAQ.cmpd.rclb.mgf	174.02	663.373	4	0	0.0028	0	2	PNTK	VFFLESPTNPTLEVVDISGVAK	LANQ	MOD:01485 V1;MOD:01485 K22	0	8618	Q2KCU5	Q2KCU5{149-170}	0	0.0001	0.0002	Q2KCU5	61.73						89.5783
7505@20170914_03_MJLorite_iTRAQ.cmpd.rclb.mgf	34.52	646.36	2	0	-0.0004	0	2		SNSSVVIASAGR	TAVG	MOD:01485 S1	0	8991	Q2K324	Q2K324{2-13}	0	0.0001	0.0002	Q2K324	89.07						175.971
62467@20170914_03_MJLorite_iTRAQ.cmpd.rclb.mgf	198.38	753.426	4	0	-0.0007	0	2	RMRK	FFEEVALLSQSFVINPDLTVAAAIK	EAEK	MOD:01485 F1;MOD:01485 K25	0	6902	Q2K8Y6	Q2K8Y6{243-267}	0	0.0001	0.0002	Q2K8Y6	70.78						98.6939
51010@20170914_03_MJLorite_iTRAQ.cmpd.rclb.mgf	162.22	694.874	4	0	0.0067	0	2	AAAR	GETALGIVFMHDAVAQTAEGFPVK	SVAP	MOD:01485 G1;MOD:01485 K24	0	638	Q2K8C6	Q2K8C6{217-240}	0	0.0001	0.0002	Q2K8C6	70.79						104.144
51013@20170914_03_MJLorite_iTRAQ.cmpd.rclb.mgf	162.22	720.895	4	0	0.0041	0	2	NFGK	IATESGAELVGTDGFDQSIQLVLTK	RADA	MOD:01485 I1;MOD:01485 K25	0	4137	Q2K336	Q2K336{155-179}	0	0.0001	0.0002	Q2K336	91.75						114.063
58258@20170914_03_MJLorite_iTRAQ.cmpd.rclb.mgf	185.87	989.487	4	0	0.002	0	2	LDGK	AGADMLIGAAGNDTYIVDDAGDVVTEGLNEGTDWIK	TALS	MOD:01485 A1;MOD:01485 K36	0	6947	Q2KC97	Q2KC97{592-627,1195-1230}	0	0.0001	0.0002	Q2KC97	70.32						121.43
62374@20170914_03_MJLorite_iTRAQ.cmpd.rclb.mgf	198.12	674.398	4	0	-0.0003	0	2	EITR	EALGVIGIITPWNFPIAIPAWK	IAPA	MOD:01485 E1;MOD:01485 K22	0	3487	Q2K5F9	Q2K5F9{136-157}	0	0.0001	0.0002	Q2K5F9	65.74						103.301
42520@20170914_03_MJLorite_iTRAQ.cmpd.rclb.mgf	137.3	864.944	4	0	0.0147	1	2	GIYK	FATAWQEQNPDYKIEITASSAGIPYPDR	LKEV	MOD:01485 F1;MOD:01485 K13	0	6989	Q2K0L8	Q2K0L8{156-183}	0	0.0001	0.0002	Q2K0L8	73						120.774
37529@20170914_03_MJLorite_iTRAQ.cmpd.rclb.mgf	122.63	740.416	4	0	0.0057	0	2	FGGK	VLGVPVEIVDADHQNKPDIASNIAR	QWYD	MOD:01485 V1;MOD:01485 K16	0	8393	Q2K0R6	Q2K0R6{64-88}	0	0.0001	0.0002	Q2K0R6	95.29						96.0758
24985@20170914_03_MJLorite_iTRAQ.cmpd.rclb.mgf	85.85	578.818	4	0	0.0068	0	2	AETK	ASATTEAAADPAVVAVHDSLK	IFTD	MOD:01485 A1;MOD:01485 K21	0	1972	Q2K708	Q2K708{371-391}	0	0.0001	0.0002	Q2K708	64.26						92.4631
37441@20170914_03_MJLorite_iTRAQ.cmpd.rclb.mgf	122.37	740.416	4	0	0.0057	0	2	FGGK	VLGVPVEIVDADHQNKPDIASNIAR	QWYD	MOD:01485 V1;MOD:01485 K16	0	8393	Q2K0R6	Q2K0R6{64-88}	0	0.0001	0.0002	Q2K0R6	110.84						100.433
61082@20170914_03_MJLorite_iTRAQ.cmpd.rclb.mgf	194.18	851.726	4	0	0.0084	0	2	ESSK	LSALQTQQQLAIQSLSIANSSSQNILSLFR	G	MOD:01485 L1	0	5239	Q2K133	Q2K133{272-301}	0	0.0001	0.0002	Q2K133	128.69						128.222
22387@20170914_03_MJLorite_iTRAQ.cmpd.rclb.mgf	78.23	387.224	4	0	-0.0073	0	2	HFLR	SEAGVIGTLDPAK	ADAI	MOD:01485 S1;MOD:01485 K13	0	9495	Q2K3H4	Q2K3H4{286-298}	0	0.0001	0.0002	Q2K3H4	58.43						61.4263
37262@20170914_03_MJLorite_iTRAQ.cmpd.rclb.mgf	121.85	761.373	4	0	0.0051	0	2	VEFK	HGGTEIEPGLADSWSVSADGTEYTFK	LHPG	MOD:01485 H1;MOD:01485 K26	0	474	Q2KC86	Q2KC86{64-89}	0	0.0001	0.0002	Q2KC86	91.08						79.115
48393@20170914_03_MJLorite_iTRAQ.cmpd.rclb.mgf	154.5	770.397	4	0	0	0	2	QEVK	IGYDGIVFATDSSNPDVAYVPADIYK	ALAA	MOD:01485 I1;MOD:01485 K26	0	7138	Q2KCV8	Q2KCV8{109-134}	0	0.0001	0.0002	Q2KCV8	75.79						98.6565
45125@20170914_03_MJLorite_iTRAQ.cmpd.rclb.mgf	144.95	733.382	4	0	0.0048	0	2	GAGR	VANADPDGYTVLLHHIGMATSATLYR	KLAY	MOD:01485 V1	0	8013	Q2K4P7	Q2K4P7{81-106}	0	0.0001	0.0002	Q2K4P7	92.33						103.79
31837@20170914_03_MJLorite_iTRAQ.cmpd.rclb.mgf	105.95	405.244	4	0	0.001	0	2	SDNK	ALSAVSDALGVGAAK	VDTA	MOD:01485 A1;MOD:01485 K15	0	5239	Q2KCF1	Q2KCF1{59-73}	0	0.0001	0.0002	Q2KCF1	70.95						59.72
64833@20170914_03_MJLorite_iTRAQ.cmpd.rclb.mgf	212.82	831.42	3	0	-0.0126	0	2	DESK	TNYGYTVGAGVEAFVTNNITTR	LEYR	MOD:01485 T1	0	5698	Q2KA52	Q2KA52{153-174}	0	0.0001	0.0002	Q2KA52	119.11						129.425
49175@20170914_03_MJLorite_iTRAQ.cmpd.rclb.mgf	156.8	1144.09	2	1	-0.0176	0	2	GAAK	VDTAYTAMDSAIDVVGEIK	AKLV	MOD:01485 V1;MOD:01485 K19	0	5239	Q2KCF1	Q2KCF1{74-92}	0	0.0001	0.0002	Q2KCF1	66.85						128.209
53288@20170914_03_MJLorite_iTRAQ.cmpd.rclb.mgf	170.6	732.893	4	0	0.0123	0	2	IRAK	QYQAVTVAEPLNLQGWQLVDELNR	AFAG	MOD:01485 Q1	0	4359	Q2K1J3	Q2K1J3{294-317}	0	0.0001	0.0002	Q2K1J3	65.9						92.6737
62371@20170914_03_MJLorite_iTRAQ.cmpd.rclb.mgf	198.12	645.851	4	0	0.002	0	2	DSTR	HNIETQEALADLIAAAESIASIR	ERTG	MOD:01485 H1	0	10120	Q2K484	Q2K484{509-531}	0	0.0001	0.0002	Q2K484	90.66						109.603
59690@20170914_03_MJLorite_iTRAQ.cmpd.rclb.mgf	190.1	614.341	4	0	0.0049	0	2	ANVR	AAPVSGADEIASLLVEQVTGQVR	WRET	MOD:01485 A1	0	6072	Q2KA91	Q2KA91{238-260}	0	0.0001	0.0002	Q2KA91	84.64						81.4962
34567@20170914_03_MJLorite_iTRAQ.cmpd.rclb.mgf	113.97	454.274	4	0	0.0013	0	2	PEGR	ILQLNPSSNELIGK	MCLT	MOD:01485 I1;MOD:01485 K14	0	1153	Q2K0S9	Q2K0S9{125-138}	0	0.0001	0.0002	Q2K0S9	64.79						62.6138
31520@20170914_03_MJLorite_iTRAQ.cmpd.rclb.mgf	105.03	673.671	3	0	0.0134	0	2	STSR	MLDPMVVGEEHYEVAR	KVQS	MOD:01485 M1	0	8381	Q2K3H0	Q2K3H0{356-371}	0	0.0001	0.0002	Q2K3H0	78.37						102.404
20968@20170914_03_MJLorite_iTRAQ.cmpd.rclb.mgf	74.05	638.354	3	0	-0.0001	0	2	GKRK	ALYEPVHGSAPDIAGK	GIAN	MOD:01485 A1;MOD:01485 K16	0	2899	Q2K2V0	Q2K2V0{283-298}	0	0.0001	0.0002	Q2K2V0	58.47						120.681
11032@20170914_03_MJLorite_iTRAQ.cmpd.rclb.mgf	44.87	503.943	3	0	0.0046	0	2	KPEK	SASLASGSADIDK	ILVT	MOD:01485 S1;MOD:01485 K13	0	3746	Q2KD62	Q2KD62{74-86}	0	0.0001	0.0002	Q2KD62	58.57						85.9098
34243@20170914_03_MJLorite_iTRAQ.cmpd.rclb.mgf	113.02	551.065	4	0	-0.0004	0	2	TPEK	IQTIAIDPETGVTAADVAK	ISAA	MOD:01485 I1;MOD:01485 K19	0	1104	Q2K3F0	Q2K3F0{154-172}	0	0.0001	0.0002	Q2K3F0	94.14						66.3699
44443@20170914_03_MJLorite_iTRAQ.cmpd.rclb.mgf	142.95	948.179	3	0	0.008	0	2	AVTK	DLGWDPAIVNVNGGAIAIGHPIGASGAR	VLNT	MOD:01485 D1	0	8991	Q2K324	Q2K324{330-357}	0	0.0001	0.0002	Q2K324	91.28						133.878
32204@20170914_03_MJLorite_iTRAQ.cmpd.rclb.mgf	107.03	545.016	4	0	0.0021	0	2	TGYK	GFDWGAWHDGDDAAIQK	EADG	MOD:01485 G1;MOD:01485 K17	0	3114	Q2K4M9	Q2K4M9{148-164}	0	0.0001	0.0002	Q2K4M9	64.91						62.0156
24222@20170914_03_MJLorite_iTRAQ.cmpd.rclb.mgf	83.62	492.511	4	0	0.0022	0	2	SVLK	SAGFPAENIYDAPQAK	TDTE	MOD:01485 S1;MOD:01485 K16	0	4310	Q2K3Y6	Q2K3Y6{184-199}	0	0.0001	0.0002	Q2K3Y6	71.21						66.8412
26562@20170914_03_MJLorite_iTRAQ.cmpd.rclb.mgf	90.48	490.517	4	0	-0.0015	0	2	AEER	GIHAFGQASDMIAAGPK	AQLT	MOD:01485 G1;MOD:01485 K17	0	10500	Q2K8G8	Q2K8G8{230-246}	0	0.0001	0.0002	Q2K8G8	66.6						67.9434
31145@20170914_03_MJLorite_iTRAQ.cmpd.rclb.mgf	103.93	738.071	3	0	0.0116	0	2	SMSK	DLGQQIVVENVGGAGGTLGAGR	VANA	MOD:01485 D1	0	8013	Q2K4P7	Q2K4P7{59-80}	0	0.0001	0.0002	Q2K4P7	89.11						135.6
23998@20170914_03_MJLorite_iTRAQ.cmpd.rclb.mgf	82.95	606.663	3	0	-0.0031	0	2	FAWK	DVPVAGGGGDAAMTALK	AMVA	MOD:01485 D1;MOD:01485 K17	0	456	Q2K9G8	Q2K9G8{61-77}	0	0.0001	0.0002	Q2K3X2;Q2K9G8	61.12						111.136
31482@20170914_03_MJLorite_iTRAQ.cmpd.rclb.mgf	104.93	530.036	4	0	-0.001	0	2	GAAR	LAVAGDNPMLLSEQDAGK	VGRA	MOD:01485 L1;MOD:01485 K18	0	9869	Q2KDI3	Q2KDI3{107-124}	0	0.0001	0.0002	Q2KDI3	66.5						65.7437
47297@20170914_03_MJLorite_iTRAQ.cmpd.rclb.mgf	151.3	572.303	4	0	0.0018	0	2	GAAK	VDTAYTAMDSAIDVVGEIK	AKLV	MOD:01485 V1;MOD:01485 K19	0	5239	Q2KCF1	Q2KCF1{74-92}	0	0.0001	0.0002	Q2KCF1	72.38						64.7702
32136@20170914_03_MJLorite_iTRAQ.cmpd.rclb.mgf	106.82	975.52	2	0	0.009	0	2		TSINTNNAAMAALQTLR	GINQ	MOD:01485 T1;MOD:00719 M10	0	5239	Q2KCF0	Q2KCF0{2-18}	0	0.0001	0.0002	Q2KCF0	97.22						157.732
29263@20170914_03_MJLorite_iTRAQ.cmpd.rclb.mgf	98.42	556.047	4	0	-0.0012	0	2	VGAR	FAELGTAPSSDADATPAALK	AKLE	MOD:01485 F1;MOD:01485 K20	0	8013	Q2K4P7	Q2K4P7{286-305}	0	0.0001	0.0002	Q2K4P7	64.83						71.4376
56096@20170914_03_MJLorite_iTRAQ.cmpd.rclb.mgf	179.17	854.14	3	0	-0.0165	0	2	DENR	ANTLLDEDGILSGFVAEPILGK	QAKV	MOD:01485 A1;MOD:01485 K22	0	8399	Q2K6H3	Q2K6H3{196-217}	0	0.0001	0.0002	Q2K6H3	65.32						107.347
29544@20170914_03_MJLorite_iTRAQ.cmpd.rclb.mgf	99.23	626.337	3	0	0.0069	1	2	ELGR	QRHEIELIASENIVSR	AVLE	MOD:00040 Q1	0	7228	Q2KA25	Q2KA25{32-47}	0	0.0001	0.0002	Q2KA25	61.4						90.2532
43862@20170914_03_MJLorite_iTRAQ.cmpd.rclb.mgf	141.25	751.408	3	0	-0.0005	0	2		AESYDVIIIGSGPGGYVAAIR	ASQL	MOD:01485 A1	0	7963	O05940	O05940{2-22}	0	0.0001	0.0002	O05940	73.6						109.88
36728@20170914_03_MJLorite_iTRAQ.cmpd.rclb.mgf	120.3	466.506	4	0	0.0018	0	2	SVSR	GSIAALGFNYYDVGK	QTGE	MOD:01485 G1;MOD:01485 K15	0	5726	Q2K3B2	Q2K3B2{248-262}	0	0.0001	0.0002	Q2K3B2	75.89						72.0091
36931@20170914_03_MJLorite_iTRAQ.cmpd.rclb.mgf	120.88	718.395	4	0	-0.0018	0	2	AHKR	AIHQDAPAYVEQSTEAQILVTGIK	VVDL	MOD:01485 A1;MOD:01485 K24	0	8381	Q2K3H0	Q2K3H0{114-137}	0	0.0001	0.0002	Q2K3H0	87.81						73.7582
49509@20170914_03_MJLorite_iTRAQ.cmpd.rclb.mgf	157.8	614.086	4	0	-0.0028	0	2	GNVK	SLVYVAAFAPEAGESVADLAGK	FPGG	MOD:01485 S1;MOD:01485 K22	0	1676	Q2K6P0	Q2K6P0{107-128}	0	0.0001	0.0002	Q2K6P0	88.27						80.7899
42135@20170914_03_MJLorite_iTRAQ.cmpd.rclb.mgf	136.17	1124.89	3	0	0.0215	0	2	LVYR	NMGQQQQAIADYNAALQINPSYDVAYIGR	GNVY	MOD:01485 N1;MOD:00719 M2	0	10005	Q2K473	Q2K473{116-144}	0	0.0001	0.0002	Q2K473	60.63						130.845
42719@20170914_03_MJLorite_iTRAQ.cmpd.rclb.mgf	137.9	643.331	4	0	0.0048	0	2	NIEK	GFDASLAGTGSSDLPDIPAEFSK	TPFV	MOD:01485 G1;MOD:01485 K23	0	7659	Q2K8D8	Q2K8D8{91-113}	0	0.0001	0.0002	Q2K8D8	77.92						89.9253
48442@20170914_03_MJLorite_iTRAQ.cmpd.rclb.mgf	154.65	638.34	4	0	0.0045	1	2	SISK	RIELQENFVSALSDSIDSGIGR	LVDA	MOD:01485 R1	0	5239	Q2KCF0	Q2KCF0{238-259}	0	0.0001	0.0002	Q2KCF0	74.44						62.3521
59045@20170914_03_MJLorite_iTRAQ.cmpd.rclb.mgf	188.18	596.332	4	0	-0.0036	0	2	IATR	VMQQAFDYLDAPILTIAGK	DVPM	MOD:01485 V1;MOD:01485 K19	0	1883	Q2K8W6	Q2K8W6{415-433}	0	0.0001	0.0002	Q2K8W6	85.75						68.0231
48376@20170914_03_MJLorite_iTRAQ.cmpd.rclb.mgf	154.45	588.308	4	0	0.0021	0	2	ISTR	IELQENFVGALSDSIDSGVGR	LVDA	MOD:01485 I1	0	5239	Q2KCE9	Q2KCE9{240-260}	0	0.0001	0.0002	Q2KCE9	65.77						75.4933
40727@20170914_03_MJLorite_iTRAQ.cmpd.rclb.mgf	132.05	512.783	4	0	0.009	0	2	YPER	TITMVVPFAAGGPTDTVAR	LVAE	MOD:01485 T1	0	8013	Q2K4P7	Q2K4P7{32-50}	0	0.0001	0.0002	Q2K4P7	80.74						72.5417
44940@20170914_03_MJLorite_iTRAQ.cmpd.rclb.mgf	144.42	681.117	4	0	-0.0015	0	2	AAVK	AAFSGPVDTVASAVGADPSTQILMK	VTEV	MOD:01485 A1;MOD:01485 K25	0	4690	Q2K881	Q2K881{564-588}	0	0.0001	0.0002	Q2K881	74.99						88.7679
29590@20170914_03_MJLorite_iTRAQ.cmpd.rclb.mgf	99.37	488.264	4	0	0.008	0	2		TSINTNNAAMAALQTLR	GINQ	MOD:01485 T1;MOD:00719 M10	0	5239	Q2KCF0	Q2KCF0{2-18}	0	0.0001	0.0002	Q2KCF0	73.09						68.4007
52535@20170914_03_MJLorite_iTRAQ.cmpd.rclb.mgf	168.18	885.133	3	0	0.0103	0	2	ALEK	ISNFDINWNIVSYPNPSWAK	VVFP	MOD:01485 I1;MOD:01485 K20	0	9869	Q2KDI3	Q2KDI3{143-162}	0	0.0001	0.0002	Q2KDI3	80.67						113.9
42919@20170914_03_MJLorite_iTRAQ.cmpd.rclb.mgf	138.48	622.809	4	0	0.0025	0	2	GLPK	HYQAALTDACAFANTNMLAK	YDMK	MOD:00110 C10;MOD:01485 H1;MOD:01485 K20	0	2578	Q2K462	Q2K462{263-282}	0	0.0001	0.0002	Q2K462	61.63						77.9494
40744@20170914_03_MJLorite_iTRAQ.cmpd.rclb.mgf	132.1	678.341	4	0	0.0042	0	2	EDLK	SIMGGNDYETSPSTYLGVFQQK	LQAF	MOD:01485 S1;MOD:01485 K22	0	3383	Q2KCE0	Q2KCE0{89-110}	0	0.0001	0.0002	Q2KCE0	73.99						75.184
48183@20170914_03_MJLorite_iTRAQ.cmpd.rclb.mgf	153.88	849.429	3	1	0.0193	0	2	MGTK	DLWEAATMGYQNIGPNYWK	GEEG	MOD:01485 D1;MOD:01485 K19	0	8161	Q2K670	Q2K670{186-204}	0	0.0001	0.0002	Q2K670	63.04						124.549
59900@20170914_03_MJLorite_iTRAQ.cmpd.rclb.mgf	190.72	685.883	6	0	-0.0263	1	2	DGIR	FVVGPVTSGVAIPVSDVLAENGVLMVTPTATAPDLTKR	GLAN	MOD:01485 F1;MOD:01485 K37	0	5167	Q2K5M7	Q2K5M7{93-130}	0	0.0001	0.0002	Q2K5M7	65.71						59.6231
39331@20170914_03_MJLorite_iTRAQ.cmpd.rclb.mgf	127.9	1062.85	3	0	0.0035	1	2	DLGR	QQVQAEFGDKIETPYLENVPEGPDAER	AIER	MOD:00040 Q1;MOD:01485 K10	0	10500	Q2K8G8	Q2K8G8{52-78}	0	0.0001	0.0002	Q2K8G8	67.76						130.518
51585@20170914_03_MJLorite_iTRAQ.cmpd.rclb.mgf	164	831.425	3	0	0.0019	0	2	DESK	TNYGYTVGAGVEAFVTNNITTR	LEYR	MOD:01485 T1	0	5698	Q2KA52	Q2KA52{153-174}	0	0.0001	0.0002	Q2KA52	90.11						129.52
37903@20170914_03_MJLorite_iTRAQ.cmpd.rclb.mgf	123.73	569.592	4	0	0.0004	0	2	EVQK	NIILTGHIVDHLNTVISK	TRWA	MOD:01485 N1;MOD:01485 K18	0	5676	Q2JZM5	Q2JZM5{225-242}	0	0.0001	0.0002	Q2JZM5	60.94						88.3838
51531@20170914_03_MJLorite_iTRAQ.cmpd.rclb.mgf	163.85	592.005	3	0	0.0084	0	2		TSILTNVAAMAALQTLR	GIND		0	5239	Q2KCE9	Q2KCE9{2-18}	0	0.0001	0.0002	Q2KCE9	87.34						82.5972
46263@20170914_03_MJLorite_iTRAQ.cmpd.rclb.mgf	148.28	723.414	4	0	0.0051	0	2	PTRR	WTPYLGAGIGVNIPHVEVIRPEGK	TWAY	MOD:01485 W1;MOD:01485 K24	0	2979	Q2KC13	Q2KC13{136-159}	0	0.0001	0.0002	Q2KC13	76.68						97.6826
34372@20170914_03_MJLorite_iTRAQ.cmpd.rclb.mgf	113.38	625.586	4	0	0.0025	0	2	IQVR	LGEHNIDVLEGNEQFINAAK	IITH	MOD:01485 L1;MOD:01485 K20	0	450	P00761	P00761{58-77}	0	0.0001	0.0002	P00761	72.39						62.1841
59314@20170914_03_MJLorite_iTRAQ.cmpd.rclb.mgf	188.97	591.835	4	0	0.0012	0	2	MAEK	GQPDIAPEAWIDLLPDVVK	KGTE	MOD:01485 G1;MOD:01485 K19	0	9385	Q2JYN6	Q2JYN6{76-94}	0	0.0001	0.0002	Q2JYN6	65.21						66.434
64913@20170914_03_MJLorite_iTRAQ.cmpd.rclb.mgf	234.73	913.119	3	0	0.0059	0	2	FHVK	ADGSFTYDLTADLDAGVTYTEVLR	YYKI	MOD:01485 A1	0	201	Q2K1Q3	Q2K1Q3{184-207}	0	0.0001	0.0002	Q2K1Q3	111.04						141.892
34278@20170914_03_MJLorite_iTRAQ.cmpd.rclb.mgf	113.12	625.586	4	0	0.0025	0	2	IQVR	LGEHNIDVLEGNEQFINAAK	IITH	MOD:01485 L1;MOD:01485 K20	0	450	P00761	P00761{58-77}	0	0.0001	0.0002	P00761	69.07						60.6308
51340@20170914_03_MJLorite_iTRAQ.cmpd.rclb.mgf	163.25	536.049	4	1	0.0077	0	2	GGLK	VVGEPLGTEDFGFIFPK	GSDL	MOD:01485 V1;MOD:01485 K17	0	1188	Q2K378	Q2K378{213-229}	0	0.0001	0.0002	Q2K378	78.74						69.83
48906@20170914_03_MJLorite_iTRAQ.cmpd.rclb.mgf	156.03	579.816	4	0	0.0015	0	2	IFKK	EAPWATLDHSLVFVPMSK	KVSG	MOD:01485 E1;MOD:01485 K18	0	474	Q2KC86	Q2KC86{492-509}	0	0.0001	0.0002	Q2KC86	66.9						83.7412
54254@20170914_03_MJLorite_iTRAQ.cmpd.rclb.mgf	173.43	759.639	4	0	0.0099	0	2	KTSK	NHGAAYIASFPIPEVVMGINSFEQGAR	SVDP	MOD:01485 N1;MOD:00719 M17	0	10500	Q2K8G8	Q2K8G8{150-176}	0	0.0001	0.0002	Q2K8G8	64.2						72.9585
63158@20170914_03_MJLorite_iTRAQ.cmpd.rclb.mgf	201	661.877	4	0	0.0062	0	2	RLPK	ILFVGISAPAIQAAAQFIAEQWR	QNLG	MOD:01485 I1	0	10529	Q2K1V9	Q2K1V9{387-409}	0	0.0001	0.0002	Q2K1V9	60.15						79.6349
49266@20170914_03_MJLorite_iTRAQ.cmpd.rclb.mgf	157.08	572.303	4	0	0.0025	0	2	GAAK	VDTAYTAMDSAIDVVGEIK	AKLV	MOD:01485 V1;MOD:01485 K19	0	5239	Q2KCF1	Q2KCF1{74-92}	0	0.0001	0.0002	Q2KCF1	58.61						73.9755
36345@20170914_03_MJLorite_iTRAQ.cmpd.rclb.mgf	119.18	560.308	4	0	0.0043	1	2	ATVR	RFDDDASTIQALVSGQVK	AVGG	MOD:01485 R1;MOD:01485 K18	0	1306	Q2K7W3	Q2K7W3{171-188}	0	0.0001	0.0002	Q2K7W3	64.01						60.3744
46162@20170914_03_MJLorite_iTRAQ.cmpd.rclb.mgf	148	647.95	5	0	0.0057	1	2	DAFK	ATLNAGGITEVVNDAITPGDKDFSALTTR	IKSE	MOD:01485 A1;MOD:01485 K21	0	5167	Q2K5M7	Q2K5M7{181-209}	0	0.0001	0.0002	Q2K5M7	62.34						78.2404
47483@20170914_03_MJLorite_iTRAQ.cmpd.rclb.mgf	151.85	650.599	4	0	0.0001	0	2	GNDR	AALLNEVTNWPTYYPSSLSGK	QIAE	MOD:01485 A1;MOD:01485 K21	0	5835	Q2JZD7	Q2JZD7{187-207}	0	0.0001	0.0002	Q2JZD7	77.64						90.7518
45621@20170914_03_MJLorite_iTRAQ.cmpd.rclb.mgf	146.42	638.587	4	0	-0.0007	0	2	LMTK	TAPPGVSGFNWAEAQSAFLQGK	IGMW	MOD:01485 T1;MOD:01485 K22	0	376	Q2JZJ7	Q2JZJ7{256-277}	0	0.0001	0.0002	Q2JZJ7	87.16						81.4318
12772@20170914_03_MJLorite_iTRAQ.cmpd.rclb.mgf	49.98	520.021	4	0	0.0006	0	2	QTLR	GINQGLQTTQSHVSSGYR	VGKA	MOD:01485 G1	0	5239	Q2KCF0	Q2KCF0{19-36}	0	0.0001	0.0002	Q2KCF0	65.02						72.7657
64797@20170914_03_MJLorite_iTRAQ.cmpd.rclb.mgf	209.97	775.23	5	0	-0.0002	0	2	AVPK	EMLTVVDKPIIQYVVDEALEAGIEHLVFVTGR	NKHI	MOD:01485 E1;MOD:01485 K8	0	7180	Q2K4B9	Q2K4B9{31-62}	0	0.0001	0.0002	Q2K4B9	58.46						92.2685
58983@20170914_03_MJLorite_iTRAQ.cmpd.rclb.mgf	188	553.56	4	0	0.0038	0	2	FASR	GFNPVVAVSFAWTSAIEK	VAAE	MOD:01485 G1;MOD:01485 K18	0	2076	Q2KDS5	Q2KDS5{80-97}	0	0.0001	0.0002	Q2KDS5	79.66						73.5442
51185@20170914_03_MJLorite_iTRAQ.cmpd.rclb.mgf	162.72	535.798	4	0	0.0016	0	2	GGLK	VVGEPLGTEDFGFIFPK	GSDL	MOD:01485 V1;MOD:01485 K17	0	1188	Q2K378	Q2K378{213-229}	0	0.0001	0.0002	Q2K378	77.07						63.4162
56010@20170914_03_MJLorite_iTRAQ.cmpd.rclb.mgf	178.78	710.368	4	0	0.0026	0	2	EKFK	AAGFNPEAYTLYSYAAMQAIAGAAK	AAGS	MOD:01485 A1;MOD:01485 K25	0	3055	Q2K502	Q2K502{289-313}	0	0.0001	0.0002	Q2K502	89.68						75.3157
24799@20170914_03_MJLorite_iTRAQ.cmpd.rclb.mgf	85.3	578.818	4	0	0.0068	0	2	AETK	ASATTEAAADPAVVAVHDSLK	IFTD	MOD:01485 A1;MOD:01485 K21	0	1972	Q2K708	Q2K708{371-391}	0	0.0001	0.0002	Q2K708	78.86						94.7658
61409@20170914_03_MJLorite_iTRAQ.cmpd.rclb.mgf	195.22	844.973	4	0	0.0089	0	2	ESSK	LSALQTQQQLAVQSLSIANSSSQTILSLFR	G	MOD:01485 L1	0	5239	Q2KCF0	Q2KCF0{272-301}	0	0.0001	0.0002	Q2KCF0	111.81						128.262
38377@20170914_03_MJLorite_iTRAQ.cmpd.rclb.mgf	125.12	463.002	4	0	0.0039	0	2	EVPK	NWDEFVAAAPALEK	AGIL	MOD:01485 N1;MOD:01485 K14	0	2233	Q2K7E8	Q2K7E8{161-174}	0	0.0001	0.0002	Q2K7E8	66.48						51.4646
52197@20170914_03_MJLorite_iTRAQ.cmpd.rclb.mgf	165.97	796.446	3	0	0.0131	0	2	TSAK	VTLESVEGGFAVTAIHLSLSGR	IPGA	MOD:01485 V1	0	7820	Q2K3Z1	Q2K3Z1{84-105}	0	0.0001	0.0002	Q2K3Z1	102.86						127.02
64803@20170914_03_MJLorite_iTRAQ.cmpd.rclb.mgf	210.28	817.927	4	0	0.0094	1	2	ARPK	YLEAFIDSLINWDYVLERYEEATK		MOD:01485 Y1;MOD:01485 K24	0	3834	Q2KAX8	Q2KAX8{177-200}	0	0.0001	0.0002	Q2KAX8	86.22						95.2279
45867@20170914_03_MJLorite_iTRAQ.cmpd.rclb.mgf	147.13	639.863	4	0	0.0028	0	2	VVPK	TGVVAGVYVQAISAFAPHPNAAK	LWME	MOD:01485 T1;MOD:01485 K23	0	2394	Q2K678	Q2K678{266-288}	0	0.0001	0.0002	Q2K678	64.48						105.638
51344@20170914_03_MJLorite_iTRAQ.cmpd.rclb.mgf	163.25	636.36	4	0	-0.0003	0	2	MDVR	NTQPVTGIAESIQQTLAQAGVK	LEII	MOD:01485 N1;MOD:01485 K22	0	3376	Q2K350	Q2K350{390-411}	0	0.0001	0.0002	Q2K350	93.81						95.6467
56160@20170914_03_MJLorite_iTRAQ.cmpd.rclb.mgf	179.57	710.368	4	0	0.0031	0	2	EKFK	AAGFNPEAYTLYSYAAMQAIAGAAK	AAGS	MOD:01485 A1;MOD:01485 K25	0	3055	Q2K502	Q2K502{289-313}	0	0.0001	0.0002	Q2K502	79.66						82.0059
63508@20170914_03_MJLorite_iTRAQ.cmpd.rclb.mgf	202.15	712.153	4	0	-0.0031	0	2	KVVR	TALQDAASVASLLITTEAMIAELPK	KDAP	MOD:01485 T1;MOD:01485 K25	0	6161	Q2KBZ7	Q2KBZ7{502-526}	0	0.0001	0.0002	Q2KBZ7	111.6						82.4814
34041@20170914_03_MJLorite_iTRAQ.cmpd.rclb.mgf	112.42	609.317	4	0	0.0031	0	2	SYTR	TNIEIHDNTFDDLSEAALK	VDRP	MOD:01485 T1;MOD:01485 K19	0	1972	Q2K708	Q2K708{298-316}	0	0.0001	0.0002	Q2K708	67.66						74.4846
63518@20170914_03_MJLorite_iTRAQ.cmpd.rclb.mgf	202.23	703.395	4	0	-0.0049	0	2	VWRR	GSVITSWLLDLTADALHVDPALSK	FAGR	MOD:01485 G1;MOD:01485 K24	0	1359	Q2K4J2	Q2K4J2{253-276}	0	0.0001	0.0002	Q2K4J2	74.42						100.836
22793@20170914_03_MJLorite_iTRAQ.cmpd.rclb.mgf	79.42	572.307	4	0	0.0024	0	2	QLQK	GAEQAAADINAAGGINGEQIK	IELG	MOD:01485 G1;MOD:01485 K21	0	3055	Q2K502	Q2K502{47-67}	0	0.0001	0.0002	Q2K502	72.29						80.0262
58076@20170914_03_MJLorite_iTRAQ.cmpd.rclb.mgf	185.32	989.487	4	0	0.002	0	2	LDGK	AGADMLIGAAGNDTYIVDDAGDVVTEGLNEGTDWIK	TALS	MOD:01485 A1;MOD:01485 K36	0	6947	Q2KC97	Q2KC97{592-627,1195-1230}	0	0.0001	0.0002	Q2KC97	74.63						124.542
50941@20170914_03_MJLorite_iTRAQ.cmpd.rclb.mgf	162	929.215	4	0	0.0069	0	2	NIVK	QLQAAGYGTDLQYGDDDIPNQLSQIENMVTK	GVKV	MOD:01485 Q1;MOD:01485 K31	0	5613	Q2K5F5	Q2K5F5{52-82}	0	0.0001	0.0002	Q2K5F5	105.72						126.155
24939@20170914_03_MJLorite_iTRAQ.cmpd.rclb.mgf	85.72	463.255	5	0	0.0024	0	2	AETK	ASATTEAAADPAVVAVHDSLK	IFTD	MOD:01485 A1;MOD:01485 K21	0	1972	Q2K708	Q2K708{371-391}	0	0.0001	0.0002	Q2K708	71.09						75.7028
45739@20170914_03_MJLorite_iTRAQ.cmpd.rclb.mgf	146.75	615.318	4	0	-0.0009	0	2	DKFK	ADFANAGATQFGSGWAWVSVK	NGKL	MOD:01485 A1;MOD:01485 K21	0	3834	Q2KAX8	Q2KAX8{113-133}	0	0.0001	0.0002	Q2KAX8	60.83						81.7701
10168@20170914_03_MJLorite_iTRAQ.cmpd.rclb.mgf	42.33	508.505	4	0	0.0014	0	2	SLNK	NNTAIDNTSTDAYTNK	NVVW	MOD:01485 N1;MOD:01485 K16	0	8866	Q2K908	Q2K908{289-304}	0	0.0001	0.0002	Q2K908	65.81						48.0814
34239@20170914_03_MJLorite_iTRAQ.cmpd.rclb.mgf	113.02	500.671	5	0	0.0063	0	2	IQVR	LGEHNIDVLEGNEQFINAAK	IITH	MOD:01485 L1;MOD:01485 K20	0	450	P00761	P00761{58-77}	0	0.0001	0.0002	P00761	65.23						56.0305
60118@20170914_03_MJLorite_iTRAQ.cmpd.rclb.mgf	191.35	769.187	4	0	0.0003	0	2	FEGR	ISPDVQANYLASPPLVVAYALAGTVQK	DLTK	MOD:01485 I1;MOD:01485 K27	0	9609	Q2K397	Q2K397{542-568}	0	0.0001	0.0002	Q2K397	101.64						101.679
47070@20170914_03_MJLorite_iTRAQ.cmpd.rclb.mgf	150.63	751.364	4	0	0.0071	0	2	VPYK	GTGPAMTDLLGGQVDIMCDQTTNTTK	QIKG	MOD:00110 C18;MOD:01485 G1;MOD:01485 K26	0	8013	Q2K4P7	Q2K4P7{187-212}	0	0.0001	0.0002	Q2K4P7	81.8						93.1272
23736@20170914_03_MJLorite_iTRAQ.cmpd.rclb.mgf	82.18	960.522	2	0	0.0047	0	2		TSINTNSSAQAALQTLR	NVNQ	MOD:01485 T1	0	5239	Q2KCF1	Q2KCF1{2-18}	0	0.0001	0.0002	Q2KCF1	90.51						170.634
35389@20170914_03_MJLorite_iTRAQ.cmpd.rclb.mgf	116.37	610.057	4	0	0.0013	0	2	LLGR	IPSAVGYQPTLATDMGQMQER	ITTT	MOD:01485 I1	0	8381	Q2K3H0	Q2K3H0{274-294}	0	0.0001	0.0002	Q2K3H0	74.04						59.4501
57176@20170914_03_MJLorite_iTRAQ.cmpd.rclb.mgf	182.67	884.188	4	0	0.0098	0	2	QDLR	LAGHEAPLQLGFEDFDSYPLYSAYFGATPGR	CANR	MOD:01485 L1	0	3032	Q2K308	Q2K308{45-75}	0	0.0001	0.0002	Q2K308	71.7						102.957
49807@20170914_03_MJLorite_iTRAQ.cmpd.rclb.mgf	158.68	582.321	4	0	-0.0005	0	2	KLDK	SPAFILTQFGLTGDNVTEK	AKAA	MOD:01485 S1;MOD:01485 K19	0	3376	Q2K350	Q2K350{133-151}	0	0.0001	0.0002	Q2K350	76.5						76.5547
35633@20170914_03_MJLorite_iTRAQ.cmpd.rclb.mgf	117.08	645.349	3	0	0.0033	0	2		TSINTNNAAMAALQTLR	GINQ	MOD:01485 T1	0	5239	Q2KCF0	Q2KCF0{2-18}	0	0.0001	0.0002	Q2KCF0	100.07						108.904
51978@20170914_03_MJLorite_iTRAQ.cmpd.rclb.mgf	165.15	958.514	4	0	0.0018	0	2	DGVK	FVIGHFNSGVSIPASEVYAENGILEITPAATNPK	FTER	MOD:01485 F1;MOD:01485 K34	0	3055	Q2K502	Q2K502{94-127}	0	0.0001	0.0002	Q2K502	62.67						112.192
37402@20170914_03_MJLorite_iTRAQ.cmpd.rclb.mgf	122.27	669.105	4	0	-0.0012	0	2	ADAK	HVAEAHEFLNYMMRPEVIAK	ASDH	MOD:01485 H1;MOD:01485 K20	0	189	Q2KCA6	Q2KCA6{283-302}	0	0.0001	0.0002	Q2KCA6	72.82						74.0372
50051@20170914_03_MJLorite_iTRAQ.cmpd.rclb.mgf	159.4	638.339	4	0	0.0005	1	2	SISK	RIELQENFVSALSDSIDSGIGR	LVDA	MOD:01485 R1	0	5239	Q2KCF0	Q2KCF0{238-259}	0	0.0001	0.0002	Q2KCF0	72.58						69.9503
49938@20170914_03_MJLorite_iTRAQ.cmpd.rclb.mgf	159.05	701.396	4	0	-0.0044	1	2	LIAK	MKEAGVSIIYWGGLHTEAGLIIR	QAAD	MOD:01485 M1;MOD:01485 K2	0	3055	Q2K502	Q2K502{211-233}	0	0.0001	0.0002	Q2K502	63.94						80.5728
46577@20170914_03_MJLorite_iTRAQ.cmpd.rclb.mgf	149.2	533.073	4	0	0.0089	0	2	VKHK	HADVGVAVSIPGGLITPIIR	KAEQ	MOD:01485 H1	0	4223	Q2K8W5	Q2K8W5{313-332}	0	0.0001	0.0002	Q2K8W5	67.68						64.816
54505@20170914_03_MJLorite_iTRAQ.cmpd.rclb.mgf	174.17	1236.12	2	0	0.0039	0	2	AEMK	AECSFVSTDWDGIIPALNAK	KFDM	MOD:00110 C3;MOD:01485 A1;MOD:01485 K20	0	3015	Q2K7J0	Q2K7J0{67-86}	0	0.0001	0.0002	Q2K7J0	88.85						154.091
61641@20170914_03_MJLorite_iTRAQ.cmpd.rclb.mgf	195.95	913.458	3	1	0.022	0	2	FHVK	ADGSFTYDLTADLDAGVTYTEVLR	YYKI	MOD:01485 A1	0	201	Q2K1Q3	Q2K1Q3{184-207}	0	0.0001	0.0002	Q2K1Q3	68.1						113.868
48534@20170914_03_MJLorite_iTRAQ.cmpd.rclb.mgf	154.92	638.34	4	0	0.0046	1	2	SISK	RIELQENFVSALSDSIDSGIGR	LVDA	MOD:01485 R1	0	5239	Q2KCF0	Q2KCF0{238-259}	0	0.0001	0.0002	Q2KCF0	72.73						59.667
42370@20170914_03_MJLorite_iTRAQ.cmpd.rclb.mgf	136.87	764.613	4	0	0.0018	0	2	DKLK	ITPGVQYYSDYGIDGNDFADGDAWK	VGLT	MOD:01485 I1;MOD:01485 K25	0	6045	Q2KAI4	Q2KAI4{275-299}	0	0.0001	0.0002	Q2KAI4	67.33						99.2381
55236@20170914_03_MJLorite_iTRAQ.cmpd.rclb.mgf	176.33	754.775	3	1	-0.016	0	2	NTGR	IIAGGVAAGVVGGLIGGAIANGGPR	YVDE	MOD:01485 I1	0	8825	Q2K013	Q2K013{36-60}	0	0.0001	0.0002	Q2K013	73.1						116.505
53913@20170914_03_MJLorite_iTRAQ.cmpd.rclb.mgf	172.43	687.375	4	0	0.0013	0	2	RGLK	NANTPVWTTLLLGYGSSPLGPDGK	LRTT	MOD:01485 N1;MOD:01485 K24	0	376	Q2JZJ7	Q2JZJ7{211-234}	0	0.0001	0.0002	Q2JZJ7	73.86						88.5182
36585@20170914_03_MJLorite_iTRAQ.cmpd.rclb.mgf	119.88	520.542	4	0	0.004	0	2	INEK	LAGLSTQFGQNVLADEK	AWAL	MOD:01485 L1;MOD:01485 K17	0	7004	Q2K3C4	Q2K3C4{168-184}	0	0.0001	0.0002	Q2K3C4	62.25						77.5295
36834@20170914_03_MJLorite_iTRAQ.cmpd.rclb.mgf	120.62	718.649	4	1	0.0145	0	2	AHKR	AIHQDAPAYVEQSTEAQILVTGIK	VVDL	MOD:01485 A1;MOD:01485 K24	0	8381	Q2K3H0	Q2K3H0{114-137}	0	0.0001	0.0002	Q2K3H0	86.84						77.5916
50565@20170914_03_MJLorite_iTRAQ.cmpd.rclb.mgf	160.9	661.344	4	0	0.0012	0	2	GFLK	DASLTDPSLVESDFAEAGLAFAK	DADG	MOD:01485 D1;MOD:01485 K23	0	376	Q2JZJ7	Q2JZJ7{126-148}	0	0.0001	0.0002	Q2JZJ7	83.99						94.0073
52198@20170914_03_MJLorite_iTRAQ.cmpd.rclb.mgf	165.98	811.109	3	0	-0.0038	0	2		PIDILMPALSPTMEEGTLSK	WLKQ	MOD:01485 P1;MOD:01485 K20	0	1883	Q2K8W6	Q2K8W6{2-21}	0	0.0001	0.0002	Q2K8W6	127.03						130.399
39031@20170914_03_MJLorite_iTRAQ.cmpd.rclb.mgf	127.02	795.103	3	0	-0.0194	0	2	GYGK	TNVAGIYAIGDVAGPPMLAHK	AEHE	MOD:01485 T1;MOD:01485 K21	0	7963	O05940	O05940{316-336}	0	0.0001	0.0002	O05940	72.45						116.917
58443@20170914_03_MJLorite_iTRAQ.cmpd.rclb.mgf	186.42	554.334	4	0	0.0051	0	2	QDGR	IDVYSLPVLSIHDLLTK	ANDP	MOD:01485 I1;MOD:01485 K17	0	4070	Q2JZA9	Q2JZA9{191-207}	0	0.0001	0.0002	Q2JZA9	76.86						80.6335
52737@20170914_03_MJLorite_iTRAQ.cmpd.rclb.mgf	168.98	625.858	4	0	0.0094	0	2	PKVK	TIGYLYNSGEANSVSLLAVLK	AEAE	MOD:01485 T1;MOD:01485 K21	0	5726	Q2K3B2	Q2K3B2{156-176}	0	0.0001	0.0002	Q2K3B2	91.64						80.9859
34849@20170914_03_MJLorite_iTRAQ.cmpd.rclb.mgf	114.78	625.669	3	0	0.0005	1	2		SERLEDIAVQMVAGGR	GLLA	MOD:01485 S1	0	4233	Q2K4I0	Q2K4I0{2-17}	0	0.0001	0.0002	Q2K4I0	76.53						90.3347
49868@20170914_03_MJLorite_iTRAQ.cmpd.rclb.mgf	158.85	638.339	4	0	-0.0016	1	2	SISK	RIELQENFVSALSDSIDSGIGR	LVDA	MOD:01485 R1	0	5239	Q2KCF0	Q2KCF0{238-259}	0	0.0001	0.0002	Q2KCF0	63.18						67.3049
63019@20170914_03_MJLorite_iTRAQ.cmpd.rclb.mgf	200.48	731.392	4	0	0.005	0	2	LTVK	FTLNHPEAPFLADLAMDFASIVSK	EYAD	MOD:01485 F1;MOD:01485 K24	0	474	Q2KC86	Q2KC86{161-184}	0	0.0001	0.0002	Q2KC86	66.34						73.4036
21522@20170914_03_MJLorite_iTRAQ.cmpd.rclb.mgf	75.68	473.005	4	0	0.0053	0	2	EKAR	GITISTAHVEYETPAR	HYAH	MOD:01485 G1	0	9836	Q2K9N2	Q2K9N2{55-70}	0	0.0001	0.0002	Q2K9L8;Q2K9N2	74.6						84.9729
32289@20170914_03_MJLorite_iTRAQ.cmpd.rclb.mgf	107.28	517.29	4	0	0.0028	0	2	PIAR	LTGEYEAVVVPASSDIK	TMAD	MOD:01485 L1;MOD:01485 K17	0	10593	Q2K497	Q2K497{122-138}	0	0.0001	0.0002	Q2K497	67.61						69.816
28742@20170914_03_MJLorite_iTRAQ.cmpd.rclb.mgf	96.87	778.1	3	0	0.0073	1	2	NLAR	EVYMGPANALQQQLPTRK	SLFD	MOD:01485 E1;MOD:01485 K18	0	6895	Q2JY83	Q2JY83{343-360}	0	0.0001	0.0002	Q2JY83	68.01						99.1072
38196@20170914_03_MJLorite_iTRAQ.cmpd.rclb.mgf	124.58	976.149	3	1	0.0125	0	2	LFLR	QFGNTSVNGDPTATTNIAGTYGTFHVK	ADGS	MOD:00040 Q1;MOD:01485 K27	0	5138	Q2K591	Q2K591{154-180}	0	0.0001	0.0002	Q2K591	85.9						83.3392
57875@20170914_03_MJLorite_iTRAQ.cmpd.rclb.mgf	184.75	651.109	4	0	0.0043	0	2	VRGR	VGYDMNPFLLYGTAGLALGNVK	VSDG	MOD:01485 Y3;MOD:01485 K22	0	5698	Q2KA52	Q2KA52{121-142}	0	0.0001	0.0002	Q2KA52	71.33						79.8525
25956@20170914_03_MJLorite_iTRAQ.cmpd.rclb.mgf	88.7	960.526	2	0	0.0132	0	2		TSINTNSSAQAALQTLR	NVNQ	MOD:01485 T1	0	5239	Q2KCF1	Q2KCF1{2-18}	0	0.0001	0.0002	Q2KCF1	74.43						156.96
58279@20170914_03_MJLorite_iTRAQ.cmpd.rclb.mgf	185.93	773.916	4	1	-0.0142	0	2	QIVR	LVIEAGAPVVTSLGAYPTFNFHVAGFGGR	LVTV	MOD:01485 L1	0	7182	Q2KAK0	Q2KAK0{104-132}	0	0.0001	0.0002	Q2KAK0	80.43						106.789
52238@20170914_03_MJLorite_iTRAQ.cmpd.rclb.mgf	166.23	811.112	3	0	0.0068	0	2		PIDILMPALSPTMEEGTLSK	WLKQ	MOD:01485 P1;MOD:01485 K20	0	1883	Q2K8W6	Q2K8W6{2-21}	0	0.0001	0.0002	Q2K8W6	85.46						139.002
49540@20170914_03_MJLorite_iTRAQ.cmpd.rclb.mgf	157.88	633.846	4	0	0.0048	0	2	IFKK	AEQLALDESAALPIYYYVSK	NVVS	MOD:01485 A1;MOD:01485 K20	0	2364	Q2K5M4	Q2K5M4{480-499}	0	0.0001	0.0002	Q2K5M4	58.43						83.6285
55494@20170914_03_MJLorite_iTRAQ.cmpd.rclb.mgf	177.08	913.12	3	0	0.0066	0	2	FHVK	ADGSFTYDLTADLDAGVTYTEVLR	YYKI	MOD:01485 A1	0	201	Q2K1Q3	Q2K1Q3{184-207}	0	0.0001	0.0002	Q2K1Q3	90.84						143.608
54176@20170914_03_MJLorite_iTRAQ.cmpd.rclb.mgf	173.22	604.095	4	0	-0.0045	0	2	KGTK	ISPSGADGLAALALADAAVQSVK	EGKL	MOD:01485 I1;MOD:01485 K23	0	2880	Q2K5F0	Q2K5F0{300-322}	0	0.0001	0.0002	Q2K5F0	79.91						91.5609
34236@20170914_03_MJLorite_iTRAQ.cmpd.rclb.mgf	112.98	975.52	2	0	0.0077	0	2		TSINTNNAAMAALQTLR	GINQ	MOD:01485 T1;MOD:00719 M10	0	5239	Q2KCF0	Q2KCF0{2-18}	0	0.0001	0.0002	Q2KCF0	63.92						96.4767
59691@20170914_03_MJLorite_iTRAQ.cmpd.rclb.mgf	190.1	618.833	4	1	0.0119	0	2	HPGR	ATLTGYAGLFAFDLTPDIDVAR	FVNA	MOD:01485 A1	0	7001	Q2JYI5	Q2JYI5{302-323}	0	0.0001	0.0002	Q2JYI5	74.93						85.5161
41307@20170914_03_MJLorite_iTRAQ.cmpd.rclb.mgf	133.75	634.819	4	0	0.0105	0	2	RAAK	ADIQVFQNMTGTTGAAWNDPVR	GGEL	MOD:01485 A1	0	2076	Q2KDS5	Q2KDS5{173-194}	0	0.0001	0.0002	Q2KDS5	93.87						71.1187
50863@20170914_03_MJLorite_iTRAQ.cmpd.rclb.mgf	161.78	670.596	4	0	0.0094	0	2	RMKK	EIEDLGGTVLEYVDTPIAETSQR	MPQL	MOD:01485 E1	0	4359	Q2K1J3	Q2K1J3{207-229}	0	0.0001	0.0002	Q2K1J3	78.77						79.305
60769@20170914_03_MJLorite_iTRAQ.cmpd.rclb.mgf	193.27	604.088	4	0	0.0056	0	2	NHFR	QAPVTENLPMLLGLIGFYHR	NVLG	MOD:01485 Q1	0	1124	Q2KCY8	Q2KCY8{297-316}	0	0.0001	0.0002	Q2KCY8	80.37						68.8973
49177@20170914_03_MJLorite_iTRAQ.cmpd.rclb.mgf	156.82	579.816	4	0	0.0039	0	2	IFKK	EAPWATLDHSLVFVPMSK	KVSG	MOD:01485 E1;MOD:01485 K18	0	474	Q2KC86	Q2KC86{492-509}	0	0.0001	0.0002	Q2KC86	60.49						83.672
47703@20170914_03_MJLorite_iTRAQ.cmpd.rclb.mgf	152.48	817.435	4	0	-0.0003	0	2	IPYK	GAGPALNDVIGNQVPIMFDNLPSSSSHIK	AGTL	MOD:01485 G1;MOD:01485 K29	0	3525	Q2K4H2	Q2K4H2{193-221}	0	0.0001	0.0002	Q2K4H2	82.74						118.182
44176@20170914_03_MJLorite_iTRAQ.cmpd.rclb.mgf	142.18	527.038	4	0	0.0028	0	2	AGPK	AQLTAIVDTWGTYYSK	RVHA	MOD:01485 A1;MOD:01485 K16	0	10500	Q2K8G8	Q2K8G8{247-262}	0	0.0001	0.0002	Q2K8G8	65.47						54.3854
55285@20170914_03_MJLorite_iTRAQ.cmpd.rclb.mgf	176.47	1193.13	4	0	0.0072	0	2	EQHR	AEIGVPVVTYESTASVVPADPQPAPGDELIGPVGAVETITPPETVR	TYIE	MOD:01485 A1	0	3301	Q2K5V7	Q2K5V7{99-144}	0	0.0001	0.0002	Q2K5V7	62.51						114.49
51206@20170914_03_MJLorite_iTRAQ.cmpd.rclb.mgf	162.78	901.459	3	0	0.0077	0	2	ALIR	DLANILNETDLTEIEVEQDDLR	IRVS	MOD:01485 D1	0	6597	Q2K925	Q2K925{15-36}	0	0.0001	0.0002	Q2K925	86.98						141.625
60718@20170914_03_MJLorite_iTRAQ.cmpd.rclb.mgf	193.12	832.043	5	0	0.0119	0	2	QGLK	ATLVSGDGIVSNELASIAGDAVAGTLNTFGPDPTLNPANK	ELVE	MOD:01485 A1;MOD:01485 K40	0	3055	Q2K502	Q2K502{242-281}	0	0.0001	0.0002	Q2K502	72.22						107.875
59223@20170914_03_MJLorite_iTRAQ.cmpd.rclb.mgf	188.7	553.56	4	0	0.0038	0	2	FASR	GFNPVVAVSFAWTSAIEK	VAAE	MOD:01485 G1;MOD:01485 K18	0	2076	Q2KDS5	Q2KDS5{80-97}	0	0.0001	0.0002	Q2KDS5	58.92						76.167
40728@20170914_03_MJLorite_iTRAQ.cmpd.rclb.mgf	132.05	530.788	4	0	0.0084	0	2	IVGR	SIDDLDAGVVNTDWALK	SGLS	MOD:01485 S1;MOD:01485 K17	0	5940	Q2K283	Q2K283{200-216}	0	0.0001	0.0002	Q2K283	105.08						79.0821
64903@20170914_03_MJLorite_iTRAQ.cmpd.rclb.mgf	234.65	906.218	4	0	0.0094	0	2	RLIR	DSANVDYYATFDNFQVGVLQANSIVDGLGLK	DGKG	MOD:01485 D1;MOD:01485 K31	0	5613	Q2K5F5	Q2K5F5{120-150}	0	0.0001	0.0002	Q2K5F5	104.87						129.535
43196@20170914_03_MJLorite_iTRAQ.cmpd.rclb.mgf	139.3	643.604	4	0	-0.0013	0	2	NAAK	IITHPNFNGNTLDNDIMLIK	LSSP	MOD:01485 I1;MOD:01485 K20	0	450	P00761	P00761{78-97}	0	0.0001	0.0002	P00761	63.54						60.6072
59730@20170914_03_MJLorite_iTRAQ.cmpd.rclb.mgf	190.22	762.916	4	0	0.002	0	2	WIER	AATLVWNGPLGAFEIEPFDTATVAAAK	YAAE	MOD:01485 A1;MOD:01485 K27	0	9884	Q2K4I1	Q2K4I1{330-356}	0	0.0001	0.0002	Q2K4I1	63.22						95.2646
20981@20170914_03_MJLorite_iTRAQ.cmpd.rclb.mgf	74.1	430.501	4	0	0.0024	0	2	PSVK	SIIAGEQHSTIFK	DTRE	MOD:01485 S1;MOD:01485 K13	0	5613	Q2K5F5	Q2K5F5{274-286}	0	0.0001	0.0002	Q2K5F5	63.26						85.8802
58169@20170914_03_MJLorite_iTRAQ.cmpd.rclb.mgf	185.6	989.487	4	0	0.002	0	2	LDGK	AGADMLIGAAGNDTYIVDDAGDVVTEGLNEGTDWIK	TALS	MOD:01485 A1;MOD:01485 K36	0	6947	Q2KC97	Q2KC97{592-627,1195-1230}	0	0.0001	0.0002	Q2KC97	108.18						129.292
9329@20170914_03_MJLorite_iTRAQ.cmpd.rclb.mgf	39.88	494.001	4	0	0.0026	1	2	AQIK	AQIEETTSDYDREK	LQER	MOD:01485 A1;MOD:01485 K14	0	6161	Q2JYW6;Q2KAU2;Q2KBZ7	Q2JYW6{351-364};Q2KAU2{351-364};Q2KBZ7{351-364}	0	0.0001	0.0002	Q2JYW6;Q2KAU2;Q2KBZ7	72.27						50.1183
33681@20170914_03_MJLorite_iTRAQ.cmpd.rclb.mgf	111.37	609.054	4	0	0.0128	0	2	TMIK	DGLTDAFHGYHMGITAENIAR	QWQL	MOD:01485 D1	0	8991	Q2K324	Q2K324{147-167}	0	0.0001	0.0002	Q2K324	82.97						96.2557
55114@20170914_03_MJLorite_iTRAQ.cmpd.rclb.mgf	175.97	701.636	4	0	0.003	0	2	NLRR	SIALSVEDGVVATYIHNAVSDGLGK	LGVL	MOD:01485 S1;MOD:01485 K25	0	6902	Q2K8Y6	Q2K8Y6{142-166}	0	0.0001	0.0002	Q2K8Y6	130.31						125.57
56116@20170914_03_MJLorite_iTRAQ.cmpd.rclb.mgf	179.28	568.496	5	0	0.0032	0	2	EKFK	AAGFNPEAYTLYSYAAMQAIAGAAK	AAGS	MOD:01485 A1;MOD:01485 K25	0	3055	Q2K502	Q2K502{289-313}	0	0.0001	0.0002	Q2K502	60.15						63.4894
45027@20170914_03_MJLorite_iTRAQ.cmpd.rclb.mgf	144.67	645.369	3	0	0.001	0	2		TSILTNVAAMAALQTLR	GIND	MOD:01485 T1;MOD:00719 M10	0	5239	Q2KCE9	Q2KCE9{2-18}	0	0.0001	0.0002	Q2KCE9	81.33						106.442
46877@20170914_03_MJLorite_iTRAQ.cmpd.rclb.mgf	150.08	589.543	4	0	-0.0006	0	2	LSSR	IDSQEDFVSALSDSIDSGIGR	LVDA	MOD:01485 I1	0	5239	Q2KCF1	Q2KCF1{239-259}	0	0.0001	0.0002	Q2KCF1	73.85						82.1982
41870@20170914_03_MJLorite_iTRAQ.cmpd.rclb.mgf	135.4	583.814	4	0	-0.0041	0	2	RTIK	APDDLYLTAVTSDLVHEGK	VAGD	MOD:01485 A1;MOD:01485 K19	0	9273	Q2K8G7	Q2K8G7{118-136}	0	0.0001	0.0002	Q2K8G7	62.91						64.4094
37037@20170914_03_MJLorite_iTRAQ.cmpd.rclb.mgf	121.2	609.304	5	0	0.0217	0	2	VEFK	HGGTEIEPGLADSWSVSADGTEYTFK	LHPG	MOD:01485 H1;MOD:01485 K26	0	474	Q2KC86	Q2KC86{64-89}	0	0.0001	0.0002	Q2KC86	82.84						48.5189
58854@20170914_03_MJLorite_iTRAQ.cmpd.rclb.mgf	187.62	931.478	3	0	0.0073	0	2	LAPR	LAADLYGLEIVAENVEDTENNVTR	FVIL	MOD:01485 L1	0	10400	Q2KDY0	Q2KDY0{153-176}	0	0.0001	0.0002	Q2KDY0	88.99						127.076
54882@20170914_03_MJLorite_iTRAQ.cmpd.rclb.mgf	175.28	831.427	3	0	0.0072	0	2	DESK	TNYGYTVGAGVEAFVTNNITTR	LEYR	MOD:01485 T1	0	5698	Q2KA52	Q2KA52{153-174}	0	0.0001	0.0002	Q2KA52	83.04						127.715
58362@20170914_03_MJLorite_iTRAQ.cmpd.rclb.mgf	186.17	726.628	4	0	0.0011	0	2	FLAK	EFNVSVQDVTAFVLGGHGDTMVPLAR	YSTV	MOD:01485 E1	0	1302	Q2K3E9	Q2K3E9{160-185}	0	0.0001	0.0002	Q2K3E9	110.92						97.8119
44385@20170914_03_MJLorite_iTRAQ.cmpd.rclb.mgf	142.78	1197.17	2	0	0.0021	0	2	REYK	VSFLAPLGLSTESEASAAGVAK	LIEQ	MOD:01485 V1;MOD:01485 K22	0	10479	Q2KBK4	Q2KBK4{205-226}	0	0.0001	0.0002	Q2KBK4	107.37						174.801
30604@20170914_03_MJLorite_iTRAQ.cmpd.rclb.mgf	102.33	817.065	3	1	-0.0151	0	2	FLTK	QVDANNGAVTDVQGTYGTFHVK	ADGS	MOD:00040 Q1;MOD:01485 K22	0	201	Q2K1Q3	Q2K1Q3{162-183}	0	0.0001	0.0002	Q2K1Q3	69.64						92.5816
46104@20170914_03_MJLorite_iTRAQ.cmpd.rclb.mgf	147.82	607.579	4	0	0.0043	0	2	PLAR	IVSWATAGVDPSIMGTGPIPASR	KALE	MOD:01485 I1	0	8991	Q2K324	Q2K324{276-298}	0	0.0001	0.0002	Q2K324	70.02						81.8294
28065@20170914_03_MJLorite_iTRAQ.cmpd.rclb.mgf	94.88	546.287	4	0	0.0045	0	2	QVAK	ATGAEPGGELYVESLSDAK	GPAP	MOD:01485 A1;MOD:01485 K19	0	10479	Q2KBK4	Q2KBK4{256-274}	0	0.0001	0.0002	Q2KBK4	79.22						69.0263
56618@20170914_03_MJLorite_iTRAQ.cmpd.rclb.mgf	181.05	695.143	4	0	0.0053	0	2	KSVK	EGVIGATSQQYPLLMASLGIEAIK	KFAD	MOD:01485 E1;MOD:01485 K24	0	5517	Q2KD00	Q2KD00{269-292}	0	0.0001	0.0002	Q2KD00	77.52						118.46
56607@20170914_03_MJLorite_iTRAQ.cmpd.rclb.mgf	181	968.258	4	0	0.0095	0	2	DTVR	TTLASYTLGSDLENLTYSGTVAFTGTGNSLANTIK	GGAG	MOD:01485 T1;MOD:01485 K35	0	6947	Q2KC97	Q2KC97{546-580,1149-1183}	0	0.0001	0.0002	Q2KC97	97.94						119.5
39192@20170914_03_MJLorite_iTRAQ.cmpd.rclb.mgf	127.5	689.886	4	0	0.0044	0	2	SSLK	GVGYGTAAQPLPIVTGQDAEIPSVK	SIIA	MOD:01485 G1;MOD:01485 K25	0	5613	Q2K5F5	Q2K5F5{249-273}	0	0.0001	0.0002	Q2K5F5	89.17						88.4723
47833@20170914_03_MJLorite_iTRAQ.cmpd.rclb.mgf	152.87	985.51	3	0	0.0193	0	2	ETVR	LGGDVVVGAEVPADVTFQTIPDYEYR	YTRI	MOD:01485 L1	0	3301	Q2K5V7	Q2K5V7{157-182}	0	0.0001	0.0002	Q2K5V7	87.2						134.729
42523@20170914_03_MJLorite_iTRAQ.cmpd.rclb.mgf	137.32	962.468	3	0	0.0039	0	2	NGMR	GWVYADYLQMDYGGNQVIVEQHR	AEIG	MOD:01485 G1	0	3301	Q2K5V7	Q2K5V7{76-98}	0	0.0001	0.0002	Q2K5V7	114.23						118.83
54867@20170914_03_MJLorite_iTRAQ.cmpd.rclb.mgf	175.25	584.591	4	0	-0.0026	0	2	TDAK	VDAVLSPYDGLSIGIISSLK	GVGY	MOD:01485 V1;MOD:01485 K20	0	5613	Q2K5F5	Q2K5F5{229-248}	0	0.0001	0.0002	Q2K5F5	60.54						79.5201
31880@20170914_03_MJLorite_iTRAQ.cmpd.rclb.mgf	106.08	640.301	4	0	0.0076	0	2	DKTK	VCFVYVGSHTDGGYSQAHDLGR	QQVQ	MOD:00110 C2;MOD:01485 V1	0	10500	Q2K8G8	Q2K8G8{30-51}	0	0.0001	0.0002	Q2K8G8	84.81						103.033
29810@20170914_03_MJLorite_iTRAQ.cmpd.rclb.mgf	100.02	650.681	3	0	0.0037	0	2		TSINTNNAAMAALQTLR	GINQ	MOD:01485 T1;MOD:00719 M10	0	5239	Q2KCF0	Q2KCF0{2-18}	0	0.0001	0.0002	Q2KCF0	74.16						111.531
34638@20170914_03_MJLorite_iTRAQ.cmpd.rclb.mgf	114.17	625.585	4	0	-0.0019	0	2	IQVR	LGEHNIDVLEGNEQFINAAK	IITH	MOD:01485 L1;MOD:01485 K20	0	450	P00761	P00761{58-77}	0	0.0001	0.0002	P00761	69.41						71.4598
37502@20170914_03_MJLorite_iTRAQ.cmpd.rclb.mgf	122.55	843.683	4	0	0.0029	0	2	ILSR	GTPNLENETWVESANVINGTDTPQVAAQK	LQKG	MOD:01485 G1;MOD:01485 K29	0	8161	Q2K670	Q2K670{378-406}	0	0.0001	0.0002	Q2K670	66.25						102.37
56121@20170914_03_MJLorite_iTRAQ.cmpd.rclb.mgf	179.3	710.368	4	0	0.0031	0	2	EKFK	AAGFNPEAYTLYSYAAMQAIAGAAK	AAGS	MOD:01485 A1;MOD:01485 K25	0	3055	Q2K502	Q2K502{289-313}	0	0.0001	0.0002	Q2K502	82.44						78.2972
51888@20170914_03_MJLorite_iTRAQ.cmpd.rclb.mgf	164.88	958.514	4	0	0.0017	0	2	DGVK	FVIGHFNSGVSIPASEVYAENGILEITPAATNPK	FTER	MOD:01485 F1;MOD:01485 K34	0	3055	Q2K502	Q2K502{94-127}	0	0.0001	0.0002	Q2K502	62.11						117.073
61530@20170914_03_MJLorite_iTRAQ.cmpd.rclb.mgf	195.63	607.579	4	0	-0.0086	0	2	LGAK	VTVVEYLDTILGGMDAEVSK	QFQR	MOD:01485 V1;MOD:01485 K20	0	5902	Q2K3F8	Q2K3F8{201-220}	0	0.0001	0.0002	Q2K3F8	84.46						90.4594
47871@20170914_03_MJLorite_iTRAQ.cmpd.rclb.mgf	152.98	692.381	4	0	0.0019	1	2		ATEIRVPTLGESVSEATVGTWFK	KVGD	MOD:01485 A1;MOD:01485 K23	0	8114	Q2K3F3	Q2K3F3{2-24}	0	0.0001	0.0002	Q2K3F3	62.54						68.5588
40658@20170914_03_MJLorite_iTRAQ.cmpd.rclb.mgf	131.83	731.419	3	0	-0.0123	1	2	NLVK	KVDALVIGGGMANTFIAAR	GTNV	MOD:01485 K1;MOD:01485 K1	0	9884	Q2K4I1	Q2K4I1{231-249}	0	0.0001	0.0002	Q2K4I1	65.92						89.8298
55800@20170914_03_MJLorite_iTRAQ.cmpd.rclb.mgf	177.98	666.032	3	0	0.0084	0	2	EDAR	ATASGMAAVAAAVLCQVK	AGDH	MOD:00110 C15;MOD:01485 A1;MOD:01485 K18	0	8618	Q2KCU5	Q2KCU5{81-98}	0	0.0001	0.0002	Q2KCU5	71.85						125.371
23108@20170914_03_MJLorite_iTRAQ.cmpd.rclb.mgf	80.35	402.475	4	0	0	0	2	NIEK	ALSAADPADAAAFK	ANAE	MOD:01485 A1;MOD:01485 K14	0	10479	Q2KBK4	Q2KBK4{145-158}	0	0.0001	0.0002	Q2KBK4	75.06						69.3996
51717@20170914_03_MJLorite_iTRAQ.cmpd.rclb.mgf	164.4	701.399	4	0	0.0068	1	2	LIAK	MKEAGVSIIYWGGLHTEAGLIIR	QAAD	MOD:01485 M1;MOD:01485 K2	0	3055	Q2K502	Q2K502{211-233}	0	0.0001	0.0002	Q2K502	69.91						74.5636
58631@20170914_03_MJLorite_iTRAQ.cmpd.rclb.mgf	186.97	700.654	4	0	-0.0003	0	2	FKQK	GLTPLALGAIDTSGQHLLASLAYTK	ADDA	MOD:01485 G1;MOD:01485 K25	0	898	Q2K239	Q2K239{186-210}	0	0.0001	0.0002	Q2K239	72.76						117.967
50976@20170914_03_MJLorite_iTRAQ.cmpd.rclb.mgf	162.12	556.103	5	0	0.0191	0	2	AAAR	GETALGIVFMHDAVAQTAEGFPVK	SVAP	MOD:01485 G1;MOD:01485 K24	0	638	Q2K8C6	Q2K8C6{217-240}	0	0.0001	0.0002	Q2K8C6	80.76						77.3761
46331@20170914_03_MJLorite_iTRAQ.cmpd.rclb.mgf	148.48	972.146	3	0	-0.0006	0	2	GLEK	LDSGEININDTPLHALSEDEVADFR	GRNI	MOD:01485 L1	0	8044	Q2K3A3	Q2K3A3{61-85}	0	0.0001	0.0002	Q2K3A3	64.93						120.673
58135@20170914_03_MJLorite_iTRAQ.cmpd.rclb.mgf	185.5	878.203	4	1	0.0308	0	2	CTKK	NLMLQGSDLQGANLFSTDFSLTDLSGSNFK	SANL	MOD:01485 N1;MOD:01485 K30	0	3859	Q2KAU5	Q2KAU5{45-74}	0	0.0001	0.0002	Q2KAU5	60.79						112.65
34521@20170914_03_MJLorite_iTRAQ.cmpd.rclb.mgf	113.83	629.332	4	0	0.004	0	2	QGVK	ADAVAAGASAAAADEALAGAEIDPK	VLSR	MOD:01485 A1;MOD:01485 K25	0	2517	Q2K699	Q2K699{51-75}	0	0.0001	0.0002	Q2K699	94.79						109.174
49495@20170914_03_MJLorite_iTRAQ.cmpd.rclb.mgf	157.75	810.65	4	0	0.0056	0	2	GADR	LIGGTGDDTYIVDNAGDLVTEAADAGTDTVR	TALS	MOD:01485 L1	0	6947	Q2KC97	Q2KC97{945-975,1548-1578}	0	0.0001	0.0002	Q2KC97	142.04						119.974
24685@20170914_03_MJLorite_iTRAQ.cmpd.rclb.mgf	84.97	640.685	3	0	0.0073	0	2		TSINTNSSAQAALQTLR	NVNQ	MOD:01485 T1	0	5239	Q2KCF1	Q2KCF1{2-18}	0	0.0001	0.0002	Q2KCF1	90.42						104.321
52200@20170914_03_MJLorite_iTRAQ.cmpd.rclb.mgf	165.98	903.95	4	1	-0.0256	0	2	FLCR	TDNFGVLVHDPETGFTAAIDAPEEAPILEAATR	RGWK	MOD:01485 T1	0	8183	Q2K3M6	Q2K3M6{13-45}	0	0.0001	0.0002	Q2K3M6	58.8						115.011
50859@20170914_03_MJLorite_iTRAQ.cmpd.rclb.mgf	161.77	621.128	5	0	0.0041	0	2	NACR	ETIEAIETVLKPGHTFGDVFDMHAR	IMDE	MOD:01485 E1;MOD:01485 K11	0	9001	Q2K5U8	Q2K5U8{271-295}	0	0.0001	0.0002	Q2K5U8	64.52						72.4355
53287@20170914_03_MJLorite_iTRAQ.cmpd.rclb.mgf	170.6	716.889	4	0	-0.001	1	2	AYMK	QGYLESSNVDPVKEITELISAQR	AYEM	MOD:01485 Q1;MOD:01485 K13	0	9528	Q2KCF9	Q2KCF9{216-238}	0	0.0001	0.0002	Q2KCF9	86.82						100.627
20581@20170914_03_MJLorite_iTRAQ.cmpd.rclb.mgf	72.92	649.361	3	0	-0.0008	0	2	TGSK	QGITTPPGNPAYNISK	SGVK	MOD:01485 Q1;MOD:01485 K16	0	377	Q2K3B6	Q2K3B6{158-173}	0	0.0001	0.0002	Q2K3B6	65.26						109.677
60064@20170914_03_MJLorite_iTRAQ.cmpd.rclb.mgf	191.2	906.216	4	0	0.0026	0	2	RLIR	DSANVDYYATFDNFQVGVLQANSIVDGLGLK	DGKG	MOD:01485 D1;MOD:01485 K31	0	5613	Q2K5F5	Q2K5F5{120-150}	0	0.0001	0.0002	Q2K5F5	108.81						133.602
24218@20170914_03_MJLorite_iTRAQ.cmpd.rclb.mgf	83.6	414.229	5	0	0.0039	0	2	MLR	FAVVGIDHGHTFDHVK	GLLA	MOD:01485 F1;MOD:01485 K16	0	2176	Q2K281	Q2K281{4-19}	0	0.0001	0.0002	Q2K281	71.14						49.3184
31744@20170914_03_MJLorite_iTRAQ.cmpd.rclb.mgf	105.68	976.012	2	1	-0.0068	0	2		TSINTNNSAMAALQTLR	SINS	MOD:01485 T1	0	5239	Q2K133	Q2K133{2-18}	0	0.0001	0.0002	Q2K133	116.2						174.36
64648@20170914_03_MJLorite_iTRAQ.cmpd.rclb.mgf	206.52	906.47	4	1	0.0181	0	2	RLIR	DSANVDYYATFDNFQVGVLQANSIVDGLGLK	DGKG	MOD:01485 D1;MOD:01485 K31	0	5613	Q2K5F5	Q2K5F5{120-150}	0	0.0001	0.0002	Q2K5F5	81.05						123.026
31809@20170914_03_MJLorite_iTRAQ.cmpd.rclb.mgf	105.88	531.529	4	0	0.0021	0	2	FVSK	EVLEDPAVYPTDEVMK	GLFT	MOD:01485 E1;MOD:01485 K16	0	189	Q2KCA6	Q2KCA6{323-338}	0	0.0001	0.0002	Q2KCA6	59.7						61.1856
30870@20170914_03_MJLorite_iTRAQ.cmpd.rclb.mgf	103.12	775.413	4	0	0.001	0	2	GVFK	GNLDSGANIAPVAPATLPSANAATTTADTK	KFSM	MOD:01485 G1;MOD:01485 K30	0	1654	Q2KCE1	Q2KCE1{166-195}	0	0.0001	0.0002	Q2KCE1	99.09						101.584
31977@20170914_03_MJLorite_iTRAQ.cmpd.rclb.mgf	106.35	640.301	4	0	0.0074	0	2	DKTK	VCFVYVGSHTDGGYSQAHDLGR	QQVQ	MOD:00110 C2;MOD:01485 V1	0	10500	Q2K8G8	Q2K8G8{30-51}	0	0.0001	0.0002	Q2K8G8	99.37						103.376
40718@20170914_03_MJLorite_iTRAQ.cmpd.rclb.mgf	132.02	733.382	3	1	-0.0194	0	2	PQYK	FVMEGAADIAQETGLATGK	YDIA	MOD:01485 F1;MOD:01485 K19	0	6989	Q2K0L8	Q2K0L8{75-93}	0	0.0001	0.0002	Q2K0L8	83.02						146.245
53221@20170914_03_MJLorite_iTRAQ.cmpd.rclb.mgf	170.4	625.857	4	0	0.006	0	2	PKVK	TIGYLYNSGEANSVSLLAVLK	AEAE	MOD:01485 T1;MOD:01485 K21	0	5726	Q2K3B2	Q2K3B2{156-176}	0	0.0001	0.0002	Q2K3B2	66.78						88.0015
44773@20170914_03_MJLorite_iTRAQ.cmpd.rclb.mgf	143.92	846.675	4	0	0.0006	0	2	GADR	LIGGTGDDTYIVDNAGDLVTEAADAGTDTVR	TALS	MOD:01485 L1;MOD:01485 Y10	0	6947	Q2KC97	Q2KC97{945-975,1548-1578}	0	0.0001	0.0002	Q2KC97	91.16						141.947
54399@20170914_03_MJLorite_iTRAQ.cmpd.rclb.mgf	173.87	747.892	4	0	0.0056	0	2	HGKR	NAALIGAGIGALAGGAIGNYMDQQEAELR	AQLE	MOD:01485 N1	0	998	Q2K6F8	Q2K6F8{60-88}	0	0.0001	0.0002	Q2K6F8	100.83						116.787
21300@20170914_03_MJLorite_iTRAQ.cmpd.rclb.mgf	75.03	671.333	4	0	0.0012	0	2	VDPK	FAGASSDNFHLSSGSTAIDHGTSK	YGVS	MOD:01485 F1;MOD:01485 K24	0	8866	Q2K908	Q2K908{346-369}	0	0.0001	0.0002	Q2K908	72.08						97.6206
43178@20170914_03_MJLorite_iTRAQ.cmpd.rclb.mgf	139.23	782.619	4	0	0.0042	0	2	DKLK	ITPGVQYYGDIYEAGDDFSDNDAWK	VGLT	MOD:01485 I1;MOD:01485 K25	0	6045	Q2K7H2	Q2K7H2{275-299}	0	0.0001	0.0002	Q2K7H2	83.63						78.1814
56554@20170914_03_MJLorite_iTRAQ.cmpd.rclb.mgf	180.85	612.099	4	0	0.0062	0	2	ALLR	TIPTYVVTHPLAALAGLSSYAR	MPAN	MOD:01485 T1	0	3574	Q2KDT9	Q2KDT9{304-325}	0	0.0001	0.0002	Q2KDT9	64.25						99.4893
36945@20170914_03_MJLorite_iTRAQ.cmpd.rclb.mgf	120.93	645.681	3	1	-0.0022	0	2		TSINTNNAAMAALQTLR	GINQ	MOD:01485 T1	0	5239	Q2KCF0	Q2KCF0{2-18}	0	0.0001	0.0002	Q2KCF0	59.85						119.574
28998@20170914_03_MJLorite_iTRAQ.cmpd.rclb.mgf	97.63	565.771	4	0	0.0061	0	2	STLK	AASLTADQFDSEEGTMSSLR	SMSE	MOD:01485 A1	0	478	Q2K2Q6	Q2K2Q6{168-187}	0	0.0001	0.0002	Q2K2Q6	75.32						80.8275
42137@20170914_03_MJLorite_iTRAQ.cmpd.rclb.mgf	136.18	558.544	4	0	0.0037	0	2	PIAR	LTPDQAMYHFLSGYTAK	VAGT	MOD:01485 L1;MOD:01485 K17	0	7556	Q2KE66	Q2KE66{362-378}	0	0.0001	0.0002	Q2KE66	74.95						61.8254
64796@20170914_03_MJLorite_iTRAQ.cmpd.rclb.mgf	209.92	818.176	4	1	0.0056	1	2	ARPK	YLEAFIDSLINWDYVLERYEEATK		MOD:01485 Y1;MOD:01485 K24	0	3834	Q2KAX8	Q2KAX8{177-200}	0	0.0001	0.0002	Q2KAX8	76						91.0155
40074@20170914_03_MJLorite_iTRAQ.cmpd.rclb.mgf	130.13	633.378	3	0	-0.0112	0	2	SDER	IAAGTAGELEGIPLGIK	DLFA	MOD:01485 I1;MOD:01485 K17	0	5776	Q2K939	Q2K939{63-79}	0	0.0001	0.0002	Q2K939	69.19						104.477
54419@20170914_03_MJLorite_iTRAQ.cmpd.rclb.mgf	173.93	618.563	4	0	0.0008	0	2	AEMK	AECSFVSTDWDGIIPALNAK	KFDM	MOD:00110 C3;MOD:01485 A1;MOD:01485 K20	0	3015	Q2K7J0	Q2K7J0{67-86}	0	0.0001	0.0002	Q2K7J0	85.69						72.9851
17794@20170914_03_MJLorite_iTRAQ.cmpd.rclb.mgf	64.72	763.407	3	0	0.0148	1	2	IDQR	RVSAVGFGPSQPVASNASEAGR	AQNR	MOD:01485 R1	0	998	Q2K6F8	Q2K6F8{184-205}	0	0.0001	0.0002	Q2K6F8	61.78						117.715
39680@20170914_03_MJLorite_iTRAQ.cmpd.rclb.mgf	128.97	581.551	4	0	-0.0004	0	2	ITGK	AGGQIMGDWAQGEFALAGQK	AGTD	MOD:01485 A1;MOD:01485 K20	0	2233	Q2K7E8	Q2K7E8{257-276}	0	0.0001	0.0002	Q2K7E8	73.79						74.211
24154@20170914_03_MJLorite_iTRAQ.cmpd.rclb.mgf	83.4	763.072	3	1	-0.0007	0	2	QLQK	GAEQAAADINAAGGINGEQIK	IELG	MOD:01485 G1;MOD:01485 K21	0	3055	Q2K502	Q2K502{47-67}	0	0.0001	0.0002	Q2K502	59.84						109.118
63058@20170914_03_MJLorite_iTRAQ.cmpd.rclb.mgf	200.68	895.751	4	0	-0.0006	0	2	SAAK	QLTDVESLISQGANALIILAQDADAIAPAIEK	AAAE	MOD:01485 Q1;MOD:01485 K32	0	10540	Q2K5E8	Q2K5E8{70-101}	0	0.0001	0.0002	Q2K5E8	111.47						119.37
46301@20170914_03_MJLorite_iTRAQ.cmpd.rclb.mgf	148.38	837.209	4	0	0.0058	0	2	EAVR	AAITDATAAILIEPVQGEGGVRPATTEFMK	ALRR	MOD:01485 A1;MOD:01485 K30	0	7757	Q2KCV1	Q2KCV1{171-200}	0	0.0001	0.0002	Q2KCV1	74.85						108.723
58385@20170914_03_MJLorite_iTRAQ.cmpd.rclb.mgf	186.25	645.563	4	0	0.0013	0	2	KDGK	MLATVEQYGAQMAVMGIDYGMR	ELAG	MOD:01485 M1	0	3790	Q2KCK8	Q2KCK8{283-304}	0	0.0001	0.0002	Q2KCK8	84.28						85.4666
43924@20170914_03_MJLorite_iTRAQ.cmpd.rclb.mgf	141.43	719.616	4	0	0.0025	0	2	VAMK	AVNAGEVEGAVIYHYYWFGDQAK	TGEN	MOD:01485 A1;MOD:01485 K23	0	2055	Q2K2Y6	Q2K2Y6{212-234}	0	0.0001	0.0002	Q2K2Y6	98.36						94.0117
58894@20170914_03_MJLorite_iTRAQ.cmpd.rclb.mgf	187.73	613.842	4	0	0.0001	1	2	GKVK	IVPAYYDLDTGVVDFLHKV		MOD:01485 I1;MOD:01485 K18	0	6177	Q8KL91	Q8KL91{198-216}	0	0.0001	0.0002	Q8KL91	65.36						51.3927
48078@20170914_03_MJLorite_iTRAQ.cmpd.rclb.mgf	153.58	638.34	4	0	0.0053	1	2	SISK	RIELQENFVSALSDSIDSGIGR	LVDA	MOD:01485 R1	0	5239	Q2KCF0	Q2KCF0{238-259}	0	0.0001	0.0002	Q2KCF0	80.68						59.5994
21198@20170914_03_MJLorite_iTRAQ.cmpd.rclb.mgf	74.73	549.803	4	0	0.0064	0	2	NGQR	IPQPANPDGPATTTTIEGK	YGTL	MOD:01485 I1;MOD:01485 K19	0	3114	Q2K4M9	Q2K4M9{48-66}	0	0.0001	0.0002	Q2K4M9	62.73						56.8628
21067@20170914_03_MJLorite_iTRAQ.cmpd.rclb.mgf	74.35	430.501	4	0	0.0024	0	2	PSVK	SIIAGEQHSTIFK	DTRE	MOD:01485 S1;MOD:01485 K13	0	5613	Q2K5F5	Q2K5F5{274-286}	0	0.0001	0.0002	Q2K5F5	58.61						84.5269
63073@20170914_03_MJLorite_iTRAQ.cmpd.rclb.mgf	200.75	731.392	4	0	0.0049	0	2	LTVK	FTLNHPEAPFLADLAMDFASIVSK	EYAD	MOD:01485 F1;MOD:01485 K24	0	474	Q2KC86	Q2KC86{161-184}	0	0.0001	0.0002	Q2KC86	62.52						72.6545
40572@20170914_03_MJLorite_iTRAQ.cmpd.rclb.mgf	131.58	875.723	4	0	0.0077	0	2	RVSR	GGTPQYVQAPIAAPAFAAPAAAATPAAAAAAPAAAPGR	NPAN	MOD:01485 G1	0	6597	Q2K925	Q2K925{42-79}	0	0.0001	0.0002	Q2K925	88.55						102.154
47927@20170914_03_MJLorite_iTRAQ.cmpd.rclb.mgf	153.15	566.066	4	0	-0.0028	0	2	LAER	AHGAAAVDLVTVLEENVGPVR	CAVR	MOD:01485 A1	0	7594	Q2K6P6	Q2K6P6{89-109}	0	0.0001	0.0002	Q2K6P6	62.65						48.2375
31053@20170914_03_MJLorite_iTRAQ.cmpd.rclb.mgf	103.65	738.068	3	0	0.0051	0	2	SMSK	DLGQQIVVENVGGAGGTLGAGR	VANA	MOD:01485 D1	0	8013	Q2K4P7	Q2K4P7{59-80}	0	0.0001	0.0002	Q2K4P7	75.8						144.512
29345@20170914_03_MJLorite_iTRAQ.cmpd.rclb.mgf	98.63	864.46	2	0	0.0142	0	2	APAR	QIAENAGDEASIVVGK	ILDK	MOD:00040 Q1;MOD:01485 K16	0	6161	Q2KBZ7	Q2KBZ7{452-467}	0	0.0001	0.0002	Q2KBZ7	85.24						112.633
40786@20170914_03_MJLorite_iTRAQ.cmpd.rclb.mgf	132.22	522.049	4	0	0.0097	0	2	GGAK	DVFVHISALQASGIQSLR	EGQQ	MOD:01485 D1	0	9332	Q2K744	Q2K744{27-44}	0	0.0001	0.0002	Q2K744	83.38						69.1865
56212@20170914_03_MJLorite_iTRAQ.cmpd.rclb.mgf	179.82	710.368	4	0	0.003	0	2	EKFK	AAGFNPEAYTLYSYAAMQAIAGAAK	AAGS	MOD:01485 A1;MOD:01485 K25	0	3055	Q2K502	Q2K502{289-313}	0	0.0001	0.0002	Q2K502	89.9						82.3886
47181@20170914_03_MJLorite_iTRAQ.cmpd.rclb.mgf	150.97	572.302	4	0	0.0003	0	2	GAAK	VDTAYTAMDSAIDVVGEIK	AKLV	MOD:01485 V1;MOD:01485 K19	0	5239	Q2KCF1	Q2KCF1{74-92}	0	0.0001	0.0002	Q2KCF1	65.86						66.7135
22282@20170914_03_MJLorite_iTRAQ.cmpd.rclb.mgf	77.92	538.059	4	0	0.0011	0	2	GSKR	TVVVDGASHVVMVSHPVK	VAEL	MOD:01485 T1;MOD:01485 K18	0	1676	Q2K6P0	Q2K6P0{228-245}	0	0.0001	0.0002	Q2K6P0	77.61						77.9442
25656@20170914_03_MJLorite_iTRAQ.cmpd.rclb.mgf	87.82	961.014	2	1	-0.0101	0	2		TSINTNSSAQAALQTLR	NVNQ	MOD:01485 T1	0	5239	Q2KCF1	Q2KCF1{2-18}	0	0.0001	0.0002	Q2KCF1	95.84						153.051
59253@20170914_03_MJLorite_iTRAQ.cmpd.rclb.mgf	188.78	553.56	4	0	0.0041	0	2	FASR	GFNPVVAVSFAWTSAIEK	VAAE	MOD:01485 G1;MOD:01485 K18	0	2076	Q2KDS5	Q2KDS5{80-97}	0	0.0001	0.0002	Q2KDS5	71.95						82.4995
22403@20170914_03_MJLorite_iTRAQ.cmpd.rclb.mgf	78.27	538.059	4	0	0.0011	0	2	GSKR	TVVVDGASHVVMVSHPVK	VAEL	MOD:01485 T1;MOD:01485 K18	0	1676	Q2K6P0	Q2K6P0{228-245}	0	0.0001	0.0002	Q2K6P0	74.02						76.8689
51811@20170914_03_MJLorite_iTRAQ.cmpd.rclb.mgf	164.67	732.665	4	0	0.0022	0	2	YLVK	GAVSNAINMPSITAEEAPILKPFIR	LADV	MOD:01485 G1;MOD:01485 K21	0	8774	Q2K4M6	Q2K4M6{308-332}	0	0.0001	0.0002	Q2K4M6	60.74						62.7059
45561@20170914_03_MJLorite_iTRAQ.cmpd.rclb.mgf	146.23	617.095	4	0	-0.0047	0	2	PNIR	DGAAIAFAHGLNVHFGLIEPK	ASVD	MOD:01485 D1;MOD:01485 K21	0	6117	Q2K6M2	Q2K6M2{100-120}	0	0.0001	0.0002	Q2K6M2	60.76						86.1005
55251@20170914_03_MJLorite_iTRAQ.cmpd.rclb.mgf	176.37	945.976	4	0	0.0082	0	2		AIHATDDTATFLETDVISGNLLSNDTSDGNLFLR	AFDQ	MOD:01485 A1	0	5138	Q2K591	Q2K591{2-35}	0	0.0001	0.0002	Q2K591	92.87						140.125
53787@20170914_03_MJLorite_iTRAQ.cmpd.rclb.mgf	172.07	562.08	4	0	0.0038	0	2	DASR	LAVAGDSVGGNMAAVVTLLAK	ERGG	MOD:01485 L1;MOD:01485 K21	0	166	Q2K5L4	Q2K5L4{173-193}	0	0.0001	0.0002	Q2K5L4	70.26						93.8669
21126@20170914_03_MJLorite_iTRAQ.cmpd.rclb.mgf	74.52	1099.09	2	1	-0.0161	0	2	NGQR	IPQPANPDGPATTTTIEGK	YGTL	MOD:01485 I1;MOD:01485 K19	0	3114	Q2K4M9	Q2K4M9{48-66}	0	0.0001	0.0002	Q2K4M9	82.76						142.539
44506@20170914_03_MJLorite_iTRAQ.cmpd.rclb.mgf	143.15	534.046	4	0	0.0038	0	2	DAWK	VGLTVDYQIVDNFYAK	ASVQ	MOD:01485 V1;MOD:01485 K16	0	6045	Q2K7H2;Q2KAI4	Q2K7H2{300-315};Q2KAI4{300-315}	0	0.0001	0.0002	Q2K7H2;Q2KAI4	69.89						72.257
18820@20170914_03_MJLorite_iTRAQ.cmpd.rclb.mgf	67.75	408.984	4	0	-0.002	0	2	AMQK	VGNEGVITVEEAK	TAET	MOD:01485 V1;MOD:01485 K13	0	6161	Q2KAU2;Q2KBZ7	Q2KAU2{169-181};Q2KBZ7{169-181}	0	0.0001	0.0002	Q2KAU2;Q2KBZ7	80.57						54.389
22119@20170914_03_MJLorite_iTRAQ.cmpd.rclb.mgf	77.45	409.258	4	0	0.0067	0	2	KKCR	VTIHSARPGLIIGR	KGAD	MOD:01485 V1	0	2418	Q2K9L0	Q2K9L0{66-79}	0	0.0001	0.0002	Q2K9L0	65						80.1073
39294@20170914_03_MJLorite_iTRAQ.cmpd.rclb.mgf	127.8	805.769	3	0	0.0064	0	2	KANK	GNTGPQAPDVIDVGLSFGPSAK	KDGL	MOD:01485 G1;MOD:01485 K22	0	2394	Q2K678	Q2K678{89-110}	0	0.0001	0.0002	Q2K678	68.23						112.398
49330@20170914_03_MJLorite_iTRAQ.cmpd.rclb.mgf	157.27	638.339	4	0	-0.0008	1	2	SISK	RIELQENFVSALSDSIDSGIGR	LVDA	MOD:01485 R1	0	5239	Q2KCF0	Q2KCF0{238-259}	0	0.0001	0.0002	Q2KCF0	74.53						60.5336
62647@20170914_03_MJLorite_iTRAQ.cmpd.rclb.mgf	198.92	716.788	5	1	0.0158	0	2	VAFR	EVSEIASTITPVPGGVGPMTIAMLMANTVIAAHR	AAGQ	MOD:01485 E1	0	7325	Q2KCC6	Q2KCC6{257-290}	0	0.0001	0.0002	Q2KCC6	60.06						67.9026
55527@20170914_03_MJLorite_iTRAQ.cmpd.rclb.mgf	177.18	627.694	3	0	0.0031	0	2	YDRK	IFIDNVLGLEYATIR	EMID	MOD:01485 I1	0	2989	Q2K3F2	Q2K3F2{171-185}	0	0.0001	0.0002	Q2K3F2	63.19						101.732
37108@20170914_03_MJLorite_iTRAQ.cmpd.rclb.mgf	121.4	761.373	4	0	0.0051	0	2	VEFK	HGGTEIEPGLADSWSVSADGTEYTFK	LHPG	MOD:01485 H1;MOD:01485 K26	0	474	Q2KC86	Q2KC86{64-89}	0	0.0001	0.0002	Q2KC86	87.09						85.9181
50154@20170914_03_MJLorite_iTRAQ.cmpd.rclb.mgf	159.68	756.399	4	0	0.0099	0	2	ADGK	MAQLNQQPLGTGPFTFVAYQPDAVIR	YKAN	MOD:01485 M1;MOD:00719 M1	0	474	Q2KC86	Q2KC86{196-221}	0	0.0001	0.0002	Q2KC86	97.46						86.3627
38845@20170914_03_MJLorite_iTRAQ.cmpd.rclb.mgf	126.48	689.886	4	0	0.0048	0	2	SSLK	GVGYGTAAQPLPIVTGQDAEIPSVK	SIIA	MOD:01485 G1;MOD:01485 K25	0	5613	Q2K5F5	Q2K5F5{249-273}	0	0.0001	0.0002	Q2K5F5	96.75						98.7511
60049@20170914_03_MJLorite_iTRAQ.cmpd.rclb.mgf	191.15	604.481	6	0	0.0088	0	2	RLIR	DSANVDYYATFDNFQVGVLQANSIVDGLGLK	DGKG	MOD:01485 D1;MOD:01485 K31	0	5613	Q2K5F5	Q2K5F5{120-150}	0	0.0001	0.0002	Q2K5F5	58.69						79.0457
55275@20170914_03_MJLorite_iTRAQ.cmpd.rclb.mgf	176.43	807.384	4	0	0.0041	0	2	NGNK	LMNEFYATQGMYALPAGNTGAQMGGWFR	KEIN	MOD:01485 L1	0	2578	Q2K462	Q2K462{138-165}	0	0.0001	0.0002	Q2K462	79.21						93.9362
35752@20170914_03_MJLorite_iTRAQ.cmpd.rclb.mgf	117.43	687.848	4	0	0.0093	0	2	PVEK	ETLDQVPEQYRPADGMWTGIAAR	TTVF	MOD:01485 E1	0	2055	Q2K2Y6	Q2K2Y6{110-132}	0	0.0001	0.0002	Q2K2Y6	64.65						107.906
45380@20170914_03_MJLorite_iTRAQ.cmpd.rclb.mgf	145.7	617.095	4	0	-0.0048	0	2	PNIR	DGAAIAFAHGLNVHFGLIEPK	ASVD	MOD:01485 D1;MOD:01485 K21	0	6117	Q2K6M2	Q2K6M2{100-120}	0	0.0001	0.0002	Q2K6M2	63.37						92.5837
39368@20170914_03_MJLorite_iTRAQ.cmpd.rclb.mgf	128.03	689.885	4	0	0.0028	0	2	SSLK	GVGYGTAAQPLPIVTGQDAEIPSVK	SIIA	MOD:01485 G1;MOD:01485 K25	0	5613	Q2K5F5	Q2K5F5{249-273}	0	0.0001	0.0002	Q2K5F5	97.25						89.3559
26262@20170914_03_MJLorite_iTRAQ.cmpd.rclb.mgf	89.6	490.517	4	0	-0.0011	0	2	AEER	GIHAFGQASDMIAAGPK	AQLT	MOD:01485 G1;MOD:01485 K17	0	10500	Q2K8G8	Q2K8G8{230-246}	0	0.0001	0.0002	Q2K8G8	64.44						58.7302
14830@20170914_03_MJLorite_iTRAQ.cmpd.rclb.mgf	56.03	410.955	4	0	-0.0026	0	2	GIGR	LVDADMEEESSK	LSAL	MOD:01485 L1;MOD:01485 K12	0	5239	Q2K133;Q2KCE9;Q2KCF0;Q2KCF1	Q2K133{260-271};Q2KCE9{261-272};Q2KCF0{260-271};Q2KCF1{260-271}	0	0.0001	0.0002	Q2K133;Q2KCE9;Q2KCF0;Q2KCF1	72.3						40.9121
37350@20170914_03_MJLorite_iTRAQ.cmpd.rclb.mgf	122.1	740.416	4	0	0.0057	0	2	FGGK	VLGVPVEIVDADHQNKPDIASNIAR	QWYD	MOD:01485 V1;MOD:01485 K16	0	8393	Q2K0R6	Q2K0R6{64-88}	0	0.0001	0.0002	Q2K0R6	65.44						97.473
5504@20170914_03_MJLorite_iTRAQ.cmpd.rclb.mgf	28.68	427.239	4	0	0.0015	0	2	ILVK	GNHLDQTHAISPK	GVIA	MOD:01485 G1;MOD:01485 K13	0	1972	Q2K708	Q2K708{196-208}	0	0.0001	0.0002	Q2K708	59.29						51.1478
31911@20170914_03_MJLorite_iTRAQ.cmpd.rclb.mgf	106.17	650.681	3	0	0.0045	0	2		TSINTNNSAMAALQTLR	SINS	MOD:01485 T1	0	5239	Q2K133	Q2K133{2-18}	0	0.0001	0.0002	Q2K133	68.84						113.613
41453@20170914_03_MJLorite_iTRAQ.cmpd.rclb.mgf	134.18	580.828	4	0	0.0059	1	2	KPPR	FLRDGDVVELGIEGLGSQK	QSFV	MOD:01485 F1;MOD:01485 K19	0	9964	Q2KE87	Q2KE87{255-273}	0	0.0001	0.0002	Q2KE87	59.11						46.0383
52882@20170914_03_MJLorite_iTRAQ.cmpd.rclb.mgf	169.4	831.763	3	1	0.0149	0	2	DESK	TNYGYTVGAGVEAFVTNNITTR	LEYR	MOD:01485 T1	0	5698	Q2KA52	Q2KA52{153-174}	0	0.0001	0.0002	Q2KA52	94.57						142.685
21809@20170914_03_MJLorite_iTRAQ.cmpd.rclb.mgf	76.52	618.325	4	0	0.0112	0	2	TLRK	ELAAQGHNTNVGDEGGFAPGLK	SASE	MOD:01485 E1;MOD:01485 K22	0	10555	Q2K8W9	Q2K8W9{191-212}	0	0.0001	0.0002	Q2K8W9	80.67						87.8921
53078@20170914_03_MJLorite_iTRAQ.cmpd.rclb.mgf	169.98	716.889	4	0	0.0017	1	2	AYMK	QGYLESSNVDPVKEITELISAQR	AYEM	MOD:01485 Q1;MOD:01485 K13	0	9528	Q2KCF9	Q2KCF9{216-238}	0	0.0001	0.0002	Q2KCF9	67.67						79.5051
56026@20170914_03_MJLorite_iTRAQ.cmpd.rclb.mgf	178.87	671.365	4	0	0.0083	0	2	RSLR	VLDGAIALLDANAGVEPQTETVWR	QAEK	MOD:01485 V1	0	7107	Q2K9L9	Q2K9L9{103-126}	0	0.0001	0.0002	Q2K9L9	58.89						84.8559
33801@20170914_03_MJLorite_iTRAQ.cmpd.rclb.mgf	111.72	593.308	4	0	0.004	0	2	PHGK	AVGDGNNYAHWLLWSHGGK	MVDE	MOD:01485 A1;MOD:01485 K19	0	2207	Q2JZK2	Q2JZK2{200-218}	0	0.0001	0.0002	Q2JZK2	73.35						82.9165
55871@20170914_03_MJLorite_iTRAQ.cmpd.rclb.mgf	178.23	584.593	4	0	0.0043	0	2	TDAK	VDAVLSPYDGLSIGIISSLK	GVGY	MOD:01485 V1;MOD:01485 K20	0	5613	Q2K5F5	Q2K5F5{229-248}	0	0.0001	0.0002	Q2K5F5	82.78						75.896
20649@20170914_03_MJLorite_iTRAQ.cmpd.rclb.mgf	73.13	392.971	4	0	-0.002	0	2	SALK	SMTSAGAALGSISK	RIEL	MOD:01485 S1;MOD:01485 K14	0	5239	Q2KCF0	Q2KCF0{224-237}	0	0.0001	0.0002	Q2KCF0	61.11						54.2307
30333@20170914_03_MJLorite_iTRAQ.cmpd.rclb.mgf	101.55	817.077	3	1	0.0192	0	2	FLTK	QVDANNGAVTDVQGTYGTFHVK	ADGS	MOD:00040 Q1;MOD:01485 K22	0	201	Q2K1Q3	Q2K1Q3{162-183}	0	0.0001	0.0002	Q2K1Q3	86.19						95.6722
43905@20170914_03_MJLorite_iTRAQ.cmpd.rclb.mgf	141.37	1241.15	2	0	0.0014	0	2	TEFR	DIYGVGLTNMIGGADPETELK	AATA	MOD:01485 D1;MOD:01485 K21	0	376	Q2JZJ7	Q2JZJ7{407-427}	0	0.0001	0.0002	Q2JZJ7	85.18						148.014
53710@20170914_03_MJLorite_iTRAQ.cmpd.rclb.mgf	171.83	759.889	4	1	0.0113	0	2	KTSK	NHGAAYIASFPIPEVVMGINSFEQGAR	SVDP	MOD:01485 N1;MOD:00719 M17	0	10500	Q2K8G8	Q2K8G8{150-176}	0	0.0001	0.0002	Q2K8G8	67.33						76.1533
49241@20170914_03_MJLorite_iTRAQ.cmpd.rclb.mgf	157	638.34	4	0	0.0037	1	2	SISK	RIELQENFVSALSDSIDSGIGR	LVDA	MOD:01485 R1	0	5239	Q2KCF0	Q2KCF0{238-259}	0	0.0001	0.0002	Q2KCF0	79.37						67.2024
22060@20170914_03_MJLorite_iTRAQ.cmpd.rclb.mgf	77.27	441.242	4	0	0.005	0	2	QNWR	MVAAAPGLSDDEVAK	ITAD	MOD:01485 M1;MOD:01485 K15	0	10593	Q2K497	Q2K497{255-269}	0	0.0001	0.0002	Q2K497	64.98						62.4722
39661@20170914_03_MJLorite_iTRAQ.cmpd.rclb.mgf	128.92	675.138	4	0	0.0031	1	2	LTLK	NPDEHAILPEIISKEPLAPAVR	QGDD	MOD:01485 N1;MOD:01485 K14	0	6573	Q2K902	Q2K902{217-238}	0	0.0001	0.0002	Q2K902	59.19						64.9381
26821@20170914_03_MJLorite_iTRAQ.cmpd.rclb.mgf	91.23	649.331	3	0	-0.0001	0	2	RVEK	ASDNAAYWSIATTMR	SDNK	MOD:01485 A1;MOD:01485 Y7	0	5239	Q2KCE9;Q2KCF1	Q2KCE9{40-54};Q2KCF1{40-54}	0	0.0001	0.0002	Q2KCE9;Q2KCF1	65.35						97.6691
54597@20170914_03_MJLorite_iTRAQ.cmpd.rclb.mgf	174.45	574.592	4	0	0.0026	0	2	PLSK	TPLSLLLAQHIDLSAGMVK	GVKE	MOD:01485 T1;MOD:01485 K19	0	6831	Q2K370	Q2K370{123-141}	0	0.0001	0.0002	Q2K370	82.42						92.3899
53636@20170914_03_MJLorite_iTRAQ.cmpd.rclb.mgf	171.63	581.333	4	0	0.0036	0	2	LTAK	NIPAEAFTLNAYAAVEVLK	AGIE	MOD:01485 N1;MOD:01485 K19	0	5167	Q2K5M7	Q2K5M7{290-308}	0	0.0001	0.0002	Q2K5M7	83.4						86.3553
60480@20170914_03_MJLorite_iTRAQ.cmpd.rclb.mgf	192.42	826.454	4	0	-0.0004	0	2	ISPK	GVIALIQDTNAVVEDNVLTGGGFGISAQAGK	TIAI	MOD:01485 G1;MOD:01485 K31	0	1972	Q2K708	Q2K708{209-239}	0	0.0001	0.0002	Q2K708	93.98						104.211
16140@20170914_03_MJLorite_iTRAQ.cmpd.rclb.mgf	59.88	661.883	2	0	0.0095	0	2		SATDLASLEK	TIEA	MOD:01485 S1;MOD:01485 K10	0	6399	Q2KD46	Q2KD46{2-11}	0	0.0001	0.0002	Q2KD46	72.44						146.61
54425@20170914_03_MJLorite_iTRAQ.cmpd.rclb.mgf	173.95	663.373	4	0	0.003	0	2	PNTK	VFFLESPTNPTLEVVDISGVAK	LANQ	MOD:01485 V1;MOD:01485 K22	0	8618	Q2KCU5	Q2KCU5{149-170}	0	0.0001	0.0002	Q2KCU5	81.09						96.8939
38854@20170914_03_MJLorite_iTRAQ.cmpd.rclb.mgf	126.5	879.46	3	0	0.0015	0	2	DESK	TNYGYTVGAGVEAFVTNNITTR	LEYR	MOD:01485 T1;MOD:01485 Y5	0	5698	Q2KA52	Q2KA52{153-174}	0	0.0001	0.0002	Q2KA52	82.25						131.518
22591@20170914_03_MJLorite_iTRAQ.cmpd.rclb.mgf	78.82	640.684	3	0	0.0056	0	2		TSINTNSSAQAALQTLR	NVNQ	MOD:01485 T1	0	5239	Q2KCF1	Q2KCF1{2-18}	0	0.0001	0.0002	Q2KCF1	72.43						110.21
48601@20170914_03_MJLorite_iTRAQ.cmpd.rclb.mgf	155.12	784.074	3	0	0.0007	0	2	ISTR	IELQENFVGALSDSIDSGVGR	LVDA	MOD:01485 I1	0	5239	Q2KCE9	Q2KCE9{240-260}	0	0.0001	0.0002	Q2KCE9	80.25						120.882
56510@20170914_03_MJLorite_iTRAQ.cmpd.rclb.mgf	180.72	831.759	3	1	0.0024	0	2	DESK	TNYGYTVGAGVEAFVTNNITTR	LEYR	MOD:01485 T1	0	5698	Q2KA52	Q2KA52{153-174}	0	0.0001	0.0002	Q2KA52	76.59						122.463
61881@20170914_03_MJLorite_iTRAQ.cmpd.rclb.mgf	196.65	952.009	4	0	0.0008	0	2	AKVK	LLTVEMPTFESMLAENPDFVAVALPSLVGPNSK	IAKR	MOD:01485 L1;MOD:01485 K33	0	5056	Q2JZ27	Q2JZ27{109-141}	0	0.0001	0.0002	Q2JZ27	67.43						107.396
48481@20170914_03_MJLorite_iTRAQ.cmpd.rclb.mgf	154.75	770.397	4	0	0	0	2	QEVK	IGYDGIVFATDSSNPDVAYVPADIYK	ALAA	MOD:01485 I1;MOD:01485 K26	0	7138	Q2KCV8	Q2KCV8{109-134}	0	0.0001	0.0002	Q2KCV8	96.22						100.733
46650@20170914_03_MJLorite_iTRAQ.cmpd.rclb.mgf	149.42	691.611	4	0	0.0036	1	2	KQLK	DFPGLNLVTTVYGDDLSDKSYR	EAEG	MOD:01485 D1;MOD:01485 K19	0	1153	Q2K0S9	Q2K0S9{180-201}	0	0.0001	0.0002	Q2K0S9	67.72						92.5519
9418@20170914_03_MJLorite_iTRAQ.cmpd.rclb.mgf	40.13	494.001	4	0	0.0026	1	2	AQIK	AQIEETTSDYDREK	LQER	MOD:01485 A1;MOD:01485 K14	0	6161	Q2JYW6;Q2KAU2;Q2KBZ7	Q2JYW6{351-364};Q2KAU2{351-364};Q2KBZ7{351-364}	0	0.0001	0.0002	Q2JYW6;Q2KAU2;Q2KBZ7	60.81						46.4022
47686@20170914_03_MJLorite_iTRAQ.cmpd.rclb.mgf	152.45	572.303	4	0	0.0009	0	2	GAAK	VDTAYTAMDSAIDVVGEIK	AKLV	MOD:01485 V1;MOD:01485 K19	0	5239	Q2KCF1	Q2KCF1{74-92}	0	0.0001	0.0002	Q2KCF1	66.08						77.6818
60158@20170914_03_MJLorite_iTRAQ.cmpd.rclb.mgf	191.47	906.216	4	0	0.0025	0	2	RLIR	DSANVDYYATFDNFQVGVLQANSIVDGLGLK	DGKG	MOD:01485 D1;MOD:01485 K31	0	5613	Q2K5F5	Q2K5F5{120-150}	0	0.0001	0.0002	Q2K5F5	87.3						119.766
48996@20170914_03_MJLorite_iTRAQ.cmpd.rclb.mgf	156.28	579.816	4	0	0.003	0	2	IFKK	EAPWATLDHSLVFVPMSK	KVSG	MOD:01485 E1;MOD:01485 K18	0	474	Q2KC86	Q2KC86{492-509}	0	0.0001	0.0002	Q2KC86	62.79						84.1812
31702@20170914_03_MJLorite_iTRAQ.cmpd.rclb.mgf	105.57	660.057	4	0	0.0077	0	2	GYIR	FQVDVGDQPLNGSASNDSDWDAR	TRGQ	MOD:01485 F1	0	6045	Q2K7H2;Q2KAI4	Q2K7H2{65-87};Q2KAI4{65-87}	0	0.0001	0.0002	Q2K7H2;Q2KAI4	92.51						90.0884
51189@20170914_03_MJLorite_iTRAQ.cmpd.rclb.mgf	162.73	636.36	4	0	-0.0004	0	2	MDVR	NTQPVTGIAESIQQTLAQAGVK	LEII	MOD:01485 N1;MOD:01485 K22	0	3376	Q2K350	Q2K350{390-411}	0	0.0001	0.0002	Q2K350	91.49						87.9501
45677@20170914_03_MJLorite_iTRAQ.cmpd.rclb.mgf	146.58	559.065	4	0	-0.0007	0	2	PILK	QGNVPMVIMNAATSAIVTK	SPLV	MOD:01485 Q1;MOD:01485 K19	0	2946	Q2K4N4	Q2K4N4{111-129}	0	0.0001	0.0002	Q2K4N4	77.48						61.5433
59073@20170914_03_MJLorite_iTRAQ.cmpd.rclb.mgf	188.27	562.6	4	0	0.0005	0	2	KILR	VLAPLGVLLPNGLGLNVDGK	DIGR	MOD:01485 V1;MOD:01485 K20	0	2314	Q2KBM4	Q2KBM4{181-200}	0	0.0001	0.0002	Q2KBM4	87.55						88.3881
39529@20170914_03_MJLorite_iTRAQ.cmpd.rclb.mgf	128.53	552.111	5	0	0.0063	0	2	SSLK	GVGYGTAAQPLPIVTGQDAEIPSVK	SIIA	MOD:01485 G1;MOD:01485 K25	0	5613	Q2K5F5	Q2K5F5{249-273}	0	0.0001	0.0002	Q2K5F5	65.49						75.435
31832@20170914_03_MJLorite_iTRAQ.cmpd.rclb.mgf	105.93	879.738	3	0	0.0016	0	2	GYIR	FQVDVGDQPLNGSASNDSDWDAR	TRGQ	MOD:01485 F1	0	6045	Q2K7H2;Q2KAI4	Q2K7H2{65-87};Q2KAI4{65-87}	0	0.0001	0.0002	Q2K7H2;Q2KAI4	117.27						153.63
35956@20170914_03_MJLorite_iTRAQ.cmpd.rclb.mgf	118.03	573.05	4	0	0.0076	0	2	SSIR	EVYQDAEQELGGVIDHAK	AEQA	MOD:01485 E1;MOD:01485 K18	0	2928	Q2JYF9	Q2JYF9{530-547}	0	0.0001	0.0002	Q2JYF9	62.4						76.0417
61404@20170914_03_MJLorite_iTRAQ.cmpd.rclb.mgf	195.2	571.825	4	0	0.0072	0	2	AQSK	ATLNYDNFLQLLIAQMK	NQDP	MOD:01485 A1;MOD:01485 K17	0	4239	Q2KCD6	Q2KCD6{25-41}	0	0.0001	0.0002	Q2KCD6	71.81						83.8938
32031@20170914_03_MJLorite_iTRAQ.cmpd.rclb.mgf	106.52	651.018	3	1	0.0156	0	2		TSINTNNAAMAALQTLR	GINQ	MOD:01485 T1;MOD:00719 M10	0	5239	Q2KCF0	Q2KCF0{2-18}	0	0.0001	0.0002	Q2KCF0	64.14						106.826
45303@20170914_03_MJLorite_iTRAQ.cmpd.rclb.mgf	145.47	733.382	4	0	0.0046	0	2	GAGR	VANADPDGYTVLLHHIGMATSATLYR	KLAY	MOD:01485 V1	0	8013	Q2K4P7	Q2K4P7{81-106}	0	0.0001	0.0002	Q2K4P7	82.11						130.891
48974@20170914_03_MJLorite_iTRAQ.cmpd.rclb.mgf	156.22	638.339	4	0	0	1	2	SISK	RIELQENFVSALSDSIDSGIGR	LVDA	MOD:01485 R1	0	5239	Q2KCF0	Q2KCF0{238-259}	0	0.0001	0.0002	Q2KCF0	59.73						62.2284
48626@20170914_03_MJLorite_iTRAQ.cmpd.rclb.mgf	155.18	638.34	4	0	0.0043	1	2	SISK	RIELQENFVSALSDSIDSGIGR	LVDA	MOD:01485 R1	0	5239	Q2KCF0	Q2KCF0{238-259}	0	0.0001	0.0002	Q2KCF0	69.88						60.4388
51467@20170914_03_MJLorite_iTRAQ.cmpd.rclb.mgf	163.65	929.215	4	0	0.006	0	2	NIVK	QLQAAGYGTDLQYGDDDIPNQLSQIENMVTK	GVKV	MOD:01485 Q1;MOD:01485 K31	0	5613	Q2K5F5	Q2K5F5{52-82}	0	0.0001	0.0002	Q2K5F5	103.15						123.327
36817@20170914_03_MJLorite_iTRAQ.cmpd.rclb.mgf	120.57	408.747	4	0	-0.0011	0	2	SDNK	ALSAVSDALGLGAAK	VDTA	MOD:01485 A1;MOD:01485 K15	0	5239	Q2K133;Q2KCE9;Q2KCF0	Q2K133{59-73};Q2KCE9{59-73};Q2KCF0{59-73}	0	0.0001	0.0002	Q2K133;Q2KCE9;Q2KCF0	58.59						56.2868
64657@20170914_03_MJLorite_iTRAQ.cmpd.rclb.mgf	206.65	625.596	4	0	0.0003	0	2	GGDR	VTGDHMGMLGTIINALALATSLR	KLNI	MOD:01485 V1	0	9737	Q2K8Y5	Q2K8Y5{72-94}	0	0.0001	0.0002	Q2K8Y5	75.89						72.9149
41056@20170914_03_MJLorite_iTRAQ.cmpd.rclb.mgf	133.02	497.034	4	0	0	0	2	TLVK	TLETQLETAYTIVSK	IQQL	MOD:01485 T1;MOD:01485 K15	0	8095	Q2KCD9	Q2KCD9{326-340}	0	0.0001	0.0002	Q2KCD9	61.94						52.9811
50497@20170914_03_MJLorite_iTRAQ.cmpd.rclb.mgf	160.72	553.305	3	0	0.002	0	2	YVSR	DEPLAILDFPDIR	NCGD	MOD:01485 D1	0	6659	Q2K5A5	Q2K5A5{28-40}	0	0.0001	0.0002	Q2K5A5	68.57						83.0041
49755@20170914_03_MJLorite_iTRAQ.cmpd.rclb.mgf	158.52	701.396	4	0	-0.0045	1	2	LIAK	MKEAGVSIIYWGGLHTEAGLIIR	QAAD	MOD:01485 M1;MOD:01485 K2	0	3055	Q2K502	Q2K502{211-233}	0	0.0001	0.0002	Q2K502	77.14						77.7224
49417@20170914_03_MJLorite_iTRAQ.cmpd.rclb.mgf	157.53	614.086	4	0	-0.0027	0	2	GNVK	SLVYVAAFAPEAGESVADLAGK	FPGG	MOD:01485 S1;MOD:01485 K22	0	1676	Q2K6P0	Q2K6P0{107-128}	0	0.0001	0.0002	Q2K6P0	89.96						87.5968
42223@20170914_03_MJLorite_iTRAQ.cmpd.rclb.mgf	136.43	911.205	4	0	0.0085	1	2	GNVK	VSDGTSDESKTNYGYTVGAGVEAFVTNNITTR	LEYR	MOD:01485 V1;MOD:01485 K10	0	5698	Q2KA52	Q2KA52{143-174}	0	0.0001	0.0002	Q2KA52	72.71						147.649
29993@20170914_03_MJLorite_iTRAQ.cmpd.rclb.mgf	100.55	650.681	3	0	0.0037	0	2		TSINTNNAAMAALQTLR	GINQ	MOD:01485 T1;MOD:00719 M10	0	5239	Q2KCF0	Q2KCF0{2-18}	0	0.0001	0.0002	Q2KCF0	66.45						113.93
44185@20170914_03_MJLorite_iTRAQ.cmpd.rclb.mgf	142.2	690.118	4	0	-0.0003	0	2	VLLK	GIAPELAENGGEGVLVVDDLTDTGK	TAAQ	MOD:01485 G1;MOD:01485 K25	0	6457	Q2K9D7	Q2K9D7{81-105}	0	0.0001	0.0002	Q2K9D7	73.19						85.3767
57581@20170914_03_MJLorite_iTRAQ.cmpd.rclb.mgf	183.87	713.886	4	0	0.0091	0	2	ERLR	AYGGTALIIDYGHLVTGFGDTLQAVR	MHEF	MOD:01485 A1	0	2117	Q2K5V0	Q2K5V0{233-258}	0	0.0001	0.0002	Q2K5V0	105.12						109.059
52827@20170914_03_MJLorite_iTRAQ.cmpd.rclb.mgf	169.25	625.857	4	0	0.008	0	2	PKVK	TIGYLYNSGEANSVSLLAVLK	AEAE	MOD:01485 T1;MOD:01485 K21	0	5726	Q2K3B2	Q2K3B2{156-176}	0	0.0001	0.0002	Q2K3B2	83.07						81.8829
57337@20170914_03_MJLorite_iTRAQ.cmpd.rclb.mgf	183.15	663.861	4	0	0.0001	0	2	AFFR	ADNSPVPYFGDASISALLTGLQK	KSGW	MOD:01485 A1;MOD:01485 K23	0	2539	Q2KC22	Q2KC22{45-67}	0	0.0001	0.0002	Q2KC22	75.07						82.0502
55763@20170914_03_MJLorite_iTRAQ.cmpd.rclb.mgf	177.87	883.465	3	0	0.0114	0	2	IAER	AYDAGSVMEPLTASGVHAALAAVFR	AASR	MOD:01485 A1	0	1640	Q2K5H9	Q2K5H9{25-49}	0	0.0001	0.0002	Q2K5H9	98.11						115.589
40521@20170914_03_MJLorite_iTRAQ.cmpd.rclb.mgf	131.45	558.808	4	0	0.007	0	2	VASK	TNDIAGDGTTTATVLAQAIVR	EGAK	MOD:01485 T1	0	6161	Q2KBZ7	Q2KBZ7{81-101}	0	0.0001	0.0002	Q2KBZ7	96.38						80.3049
51554@20170914_03_MJLorite_iTRAQ.cmpd.rclb.mgf	163.92	929.215	4	0	0.0072	0	2	NIVK	QLQAAGYGTDLQYGDDDIPNQLSQIENMVTK	GVKV	MOD:01485 Q1;MOD:01485 K31	0	5613	Q2K5F5	Q2K5F5{52-82}	0	0.0001	0.0002	Q2K5F5	131.92						131.318
23036@20170914_03_MJLorite_iTRAQ.cmpd.rclb.mgf	80.12	572.307	4	0	0.0029	0	2	QLQK	GAEQAAADINAAGGINGEQIK	IELG	MOD:01485 G1;MOD:01485 K21	0	3055	Q2K502	Q2K502{47-67}	0	0.0001	0.0002	Q2K502	68.07						73.5637
39449@20170914_03_MJLorite_iTRAQ.cmpd.rclb.mgf	128.3	689.885	4	0	0.0028	0	2	SSLK	GVGYGTAAQPLPIVTGQDAEIPSVK	SIIA	MOD:01485 G1;MOD:01485 K25	0	5613	Q2K5F5	Q2K5F5{249-273}	0	0.0001	0.0002	Q2K5F5	102.8						93.0464
44899@20170914_03_MJLorite_iTRAQ.cmpd.rclb.mgf	144.3	555.539	4	0	-0.0001	0	2	ADVK	SLVWYVPENFEEAGYK	IPTT	MOD:01485 S1;MOD:01485 K16	0	4702	Q2KCC4	Q2KCC4{172-187}	0	0.0001	0.0002	Q2KCC4	67.68						69.653
54136@20170914_03_MJLorite_iTRAQ.cmpd.rclb.mgf	173.08	831.429	3	0	0.0135	0	2	DESK	TNYGYTVGAGVEAFVTNNITTR	LEYR	MOD:01485 T1	0	5698	Q2KA52	Q2KA52{153-174}	0	0.0001	0.0002	Q2KA52	78.58						136.706
53217@20170914_03_MJLorite_iTRAQ.cmpd.rclb.mgf	170.4	563.314	4	0	0.0042	1	2	QSNK	AADAVALFDVIETVDREK	IARA	MOD:01485 A1;MOD:01485 K18	0	2757	Q2K2S8	Q2K2S8{88-105}	0	0.0001	0.0002	Q2K2S8	64.45						57.0288
58642@20170914_03_MJLorite_iTRAQ.cmpd.rclb.mgf	187	879.684	4	1	0.0122	0	2	PGLK	EYVNFFVSDQMIGPDGPLAEYGLVAAPDAER	DAIR	MOD:01485 E1	0	7138	Q2KCV8	Q2KCV8{301-331}	0	0.0001	0.0002	Q2KCV8	125.31						110.625
64801@20170914_03_MJLorite_iTRAQ.cmpd.rclb.mgf	210.15	831.424	3	0	-0.0009	0	2	DESK	TNYGYTVGAGVEAFVTNNITTR	LEYR	MOD:01485 T1	0	5698	Q2KA52	Q2KA52{153-174}	0	0.0001	0.0002	Q2KA52	63.02						103.071
39994@20170914_03_MJLorite_iTRAQ.cmpd.rclb.mgf	129.88	696.379	4	1	0.0179	0	2	MFFR	QAAGAGGPQLYSIDLTGYNEQLVK	TPSY	MOD:01485 Q1;MOD:01485 K24	0	9537	Q2K4L8	Q2K4L8{398-421}	0	0.0001	0.0002	Q2K4L8	88.35						84.7119
25704@20170914_03_MJLorite_iTRAQ.cmpd.rclb.mgf	87.95	641.011	3	1	-0.013	0	2		TSINTNSSAQAALQTLR	NVNQ	MOD:01485 T1	0	5239	Q2KCF1	Q2KCF1{2-18}	0	0.0001	0.0002	Q2KCF1	58.69						79.9516
42034@20170914_03_MJLorite_iTRAQ.cmpd.rclb.mgf	135.88	740.615	4	0	0.0103	0	2	WPGK	VVTEVVPAGDFWEAEPEHQDYLER	IPNG	MOD:01485 V1	0	3436	Q2K237	Q2K237{123-146}	0	0.0001	0.0002	Q2K237	61.13						75.0421
20767@20170914_03_MJLorite_iTRAQ.cmpd.rclb.mgf	73.47	392.971	4	0	-0.0026	0	2	SALK	SMTSAGAALGSISK	RIEL	MOD:01485 S1;MOD:01485 K14	0	5239	Q2KCF0	Q2KCF0{224-237}	0	0.0001	0.0002	Q2KCF0	66.29						63.3074
23212@20170914_03_MJLorite_iTRAQ.cmpd.rclb.mgf	80.63	572.306	4	0	-0.0018	0	2	QLQK	GAEQAAADINAAGGINGEQIK	IELG	MOD:01485 G1;MOD:01485 K21	0	3055	Q2K502	Q2K502{47-67}	0	0.0001	0.0002	Q2K502	109.08						87.3789
61630@20170914_03_MJLorite_iTRAQ.cmpd.rclb.mgf	195.92	763.163	4	0	0.0003	0	2	LVGR	ADAIYIPTDNTIISALEGAVAVAEESK	LPLF	MOD:01485 A1;MOD:01485 K27	0	5726	Q2K3B2	Q2K3B2{208-234}	0	0.0001	0.0002	Q2K3B2	65.11						102.475
55807@20170914_03_MJLorite_iTRAQ.cmpd.rclb.mgf	178	727.893	4	1	0.0283	0	2	GGVK	VALISYISAGDFFQAYQAGAEAQAK	ALDI	MOD:01485 V1;MOD:01485 K25	0	3902	Q2K245	Q2K245{41-65}	0	0.0001	0.0002	Q2K245	71.26						90.301
43128@20170914_03_MJLorite_iTRAQ.cmpd.rclb.mgf	139.1	604.579	4	0	-0.003	0	2		PINITMPALSPTMEEGNLAK	WLVK	MOD:01485 P1;MOD:01485 K20	0	4223	Q2K8W5	Q2K8W5{2-21}	0	0.0001	0.0002	Q2K8W5	72.13						60.4285
26766@20170914_03_MJLorite_iTRAQ.cmpd.rclb.mgf	91.07	759.358	3	0	0.0067	0	2	STLK	AASLTADQFDSEEGTMSSLR	SMSE	MOD:01485 A1;MOD:00719 M16	0	478	Q2K2Q6	Q2K2Q6{168-187}	0	0.0001	0.0002	Q2K2Q6	59.68						98.9903
46298@20170914_03_MJLorite_iTRAQ.cmpd.rclb.mgf	148.38	809.685	4	0	0.0045	1	2	DAFK	ATLNAGGITEVVNDAITPGDKDFSALTTR	IKSE	MOD:01485 A1;MOD:01485 K21	0	5167	Q2K5M7	Q2K5M7{181-209}	0	0.0001	0.0002	Q2K5M7	77.04						98.809
42606@20170914_03_MJLorite_iTRAQ.cmpd.rclb.mgf	137.57	722.105	4	0	0.0118	0	2	NGMR	GWVYADYLQMDYGGNQVIVEQHR	AEIG	MOD:01485 G1	0	3301	Q2K5V7	Q2K5V7{76-98}	0	0.0001	0.0002	Q2K5V7	103.86						84.1841
64843@20170914_03_MJLorite_iTRAQ.cmpd.rclb.mgf	214.23	906.219	4	0	0.012	0	2	RLIR	DSANVDYYATFDNFQVGVLQANSIVDGLGLK	DGKG	MOD:01485 D1;MOD:01485 K31	0	5613	Q2K5F5	Q2K5F5{120-150}	0	0.0001	0.0002	Q2K5F5	98.24						125.793
49088@20170914_03_MJLorite_iTRAQ.cmpd.rclb.mgf	156.57	579.816	4	0	0.0039	0	2	IFKK	EAPWATLDHSLVFVPMSK	KVSG	MOD:01485 E1;MOD:01485 K18	0	474	Q2KC86	Q2KC86{492-509}	0	0.0001	0.0002	Q2KC86	72.6						79.6874
57802@20170914_03_MJLorite_iTRAQ.cmpd.rclb.mgf	184.52	831.763	3	1	0.0159	0	2	DESK	TNYGYTVGAGVEAFVTNNITTR	LEYR	MOD:01485 Y3	0	5698	Q2KA52	Q2KA52{153-174}	0	0.0001	0.0002	Q2KA52	70.36						133.463
43750@20170914_03_MJLorite_iTRAQ.cmpd.rclb.mgf	140.92	867.442	3	0	0.0096	0	2	IADK	YGDGQATTGLNMMTDLITANPK	LVGV	MOD:01485 Y1;MOD:01485 K22	0	8759	Q2KCX3	Q2KCX3{202-223}	0	0.0001	0.0002	Q2KCX3	96.59						128.439
37490@20170914_03_MJLorite_iTRAQ.cmpd.rclb.mgf	122.52	669.105	4	0	-0.0012	0	2	ADAK	HVAEAHEFLNYMMRPEVIAK	ASDH	MOD:01485 H1;MOD:01485 K20	0	189	Q2KCA6	Q2KCA6{283-302}	0	0.0001	0.0002	Q2KCA6	78.62						86.2136
48219@20170914_03_MJLorite_iTRAQ.cmpd.rclb.mgf	153.98	916.176	3	0	0.0079	0	2	HLER	IIGETGVVPVINQIELHPDFQQR	AAQE	MOD:01485 I1	0	8377	Q2K375	Q2K375{175-197}	0	0.0001	0.0002	Q2K375	74.04						91.7705
38857@20170914_03_MJLorite_iTRAQ.cmpd.rclb.mgf	126.52	479.045	4	0	0.0059	0	2	TKGK	VVIQLLPQVAPEHVAR	IKEL	MOD:01485 V1	0	2976	Q2K8D7	Q2K8D7{20-35}	0	0.0001	0.0002	Q2K8D7	58.92						54.9232
54566@20170914_03_MJLorite_iTRAQ.cmpd.rclb.mgf	174.37	574.592	4	0	0.0026	0	2	PLSK	TPLSLLLAQHIDLSAGMVK	GVKE	MOD:01485 T1;MOD:01485 K19	0	6831	Q2K370	Q2K370{123-141}	0	0.0001	0.0002	Q2K370	83.65						93.9405
59285@20170914_03_MJLorite_iTRAQ.cmpd.rclb.mgf	188.88	650.884	4	0	0.0025	0	2	ANPK	LVGVFASNLILAQGVGQAIAENK	LGDK	MOD:01485 L1;MOD:01485 K23	0	8759	Q2KCX3	Q2KCX3{224-246}	0	0.0001	0.0002	Q2KCX3	95.11						95.0783
25019@20170914_03_MJLorite_iTRAQ.cmpd.rclb.mgf	85.95	656.339	4	0	0.0101	0	2	LHFK	GPGTDLTVGLADGHEWHGGASTAK	NGIT	MOD:01485 G1;MOD:01485 K24	0	9869	Q2KDI3	Q2KDI3{222-245}	0	0.0001	0.0002	Q2KDI3	111.99						105.087
61704@20170914_03_MJLorite_iTRAQ.cmpd.rclb.mgf	196.13	985.896	3	0	0.0065	0	2	KMTK	SNVVGSVGAIPIPEVNMLINAFAAGVK	AVNP	MOD:01485 S1;MOD:01485 K27	0	1950	Q2K226	Q2K226{153-179}	0	0.0001	0.0002	Q2K226	66.74						138.281
40893@20170914_03_MJLorite_iTRAQ.cmpd.rclb.mgf	132.53	638.344	4	0	0.0197	1	2	SISK	RIELQENFVSALSDSIDSGIGR	LVDA	MOD:01485 R1	0	5239	Q2KCF0	Q2KCF0{238-259}	0	0.0001	0.0002	Q2KCF0	61.17						66.298
40453@20170914_03_MJLorite_iTRAQ.cmpd.rclb.mgf	131.23	875.974	4	1	0.0132	0	2	RVSR	GGTPQYVQAPIAAPAFAAPAAAATPAAAAAAPAAAPGR	NPAN	MOD:01485 G1	0	6597	Q2K925	Q2K925{42-79}	0	0.0001	0.0002	Q2K925	81						95.238
59750@20170914_03_MJLorite_iTRAQ.cmpd.rclb.mgf	190.28	698.873	4	0	0.0044	1	2	IALK	AGLGEIEIDESELQAAFEDLAKR	FRGG	MOD:01485 A1;MOD:01485 K22	0	88	Q2K2P3	Q2K2P3{37-59}	0	0.0001	0.0002	Q2K2P3	60.13						79.2434
37083@20170914_03_MJLorite_iTRAQ.cmpd.rclb.mgf	121.33	955.499	3	0	0.02	0	2	ITFR	TGSNLTIENSTINDVNGDGIWVEK	FNGV	MOD:01485 T1;MOD:01485 K24	0	3818	Q2K709	Q2K709{144-167}	0	0.0001	0.0002	Q2K709	80.8						123.548
61009@20170914_03_MJLorite_iTRAQ.cmpd.rclb.mgf	193.97	590.602	4	0	0.0021	0	2	DMAR	FLLGEEPVSVLATAAVLVDK	AIGE	MOD:01485 F1;MOD:01485 K20	0	2880	Q2K5F0	Q2K5F0{181-200}	0	0.0001	0.0002	Q2K5F0	67.11						83.0068
23721@20170914_03_MJLorite_iTRAQ.cmpd.rclb.mgf	82.13	566.033	4	0	0.0056	0	2	GVFK	IGTEGTYAPFTYHDESGK	LVGF	MOD:01485 I1;MOD:01485 K18	0	4137	Q2K336	Q2K336{38-55}	0	0.0001	0.0002	Q2K336	62.15						74.2793
60832@20170914_03_MJLorite_iTRAQ.cmpd.rclb.mgf	193.45	703.144	4	0	0.006	0	2	AASR	LDVVQAEGLVQSTLAEIPGLETNIR	VSAH	MOD:01485 L1	0	7622	Q2K4R6	Q2K4R6{212-236}	0	0.0001	0.0002	Q2K4R6	58.94						91.6496
47620@20170914_03_MJLorite_iTRAQ.cmpd.rclb.mgf	152.23	868.943	4	0	0.0038	0	2	QAFR	TSPGSTVAAQGAITAAQDVANSLNNASQSVQDVR	ANAD	MOD:01485 T1	0	3383	Q2KCE0	Q2KCE0{116-149}	0	0.0001	0.0002	Q2KCE0	101.47						120.02
36936@20170914_03_MJLorite_iTRAQ.cmpd.rclb.mgf	120.9	968.01	2	1	-0.0163	0	2		TSINTNNAAMAALQTLR	GINQ	MOD:01485 T1	0	5239	Q2KCF0	Q2KCF0{2-18}	0	0.0001	0.0002	Q2KCF0	65.34						120.654
52011@20170914_03_MJLorite_iTRAQ.cmpd.rclb.mgf	165.27	540.827	4	0	0.0032	0	2	KGVK	VLVIASIDGTTLSDVLQK	AHDA	MOD:01485 V1;MOD:01485 K18	0	5613	Q2K5F5	Q2K5F5{86-103}	0	0.0001	0.0002	Q2K5F5	92.33						64.9008
56372@20170914_03_MJLorite_iTRAQ.cmpd.rclb.mgf	180.32	1184.91	3	0	0.0066	0	2	NIVK	QLQAAGYGTDLQYGDDDIPNQLSQIENMVTK	GVKV	MOD:00040 Q1;MOD:01485 K31	0	5613	Q2K5F5	Q2K5F5{52-82}	0	0.0001	0.0002	Q2K5F5	63.56						117.165
54219@20170914_03_MJLorite_iTRAQ.cmpd.rclb.mgf	173.33	748.145	4	1	0.0191	0	2	HGKR	NAALIGAGIGALAGGAIGNYMDQQEAELR	AQLE	MOD:01485 N1	0	998	Q2K6F8	Q2K6F8{60-88}	0	0.0001	0.0002	Q2K6F8	116.01						113.111
22316@20170914_03_MJLorite_iTRAQ.cmpd.rclb.mgf	78.02	569.771	4	0	0.0106	0	2	STLK	AASLTADQFDSEEGTMSSLR	SMSE	MOD:01485 A1;MOD:00719 M16	0	478	Q2K2Q6	Q2K2Q6{168-187}	0	0.0001	0.0002	Q2K2Q6	59.53						72.7955
46248@20170914_03_MJLorite_iTRAQ.cmpd.rclb.mgf	148.25	549.557	4	0	0.0027	0	2	ADTK	IGTDLGLTNEWAYNIVK	NVGN	MOD:01485 I1;MOD:01485 K17	0	6573	Q2K902	Q2K902{291-307}	0	0.0001	0.0002	Q2K902	66.53						65.1825
43323@20170914_03_MJLorite_iTRAQ.cmpd.rclb.mgf	139.67	790.373	4	0	-0.0036	0	2	IQQR	TAAYDPGNEYAVDYMWGTDGIGYNVK	KVAE	MOD:01485 T1;MOD:01485 K26	0	189	Q2KCA6	Q2KCA6{117-142}	0	0.0001	0.0002	Q2KCA6	103.52						84.9606
22245@20170914_03_MJLorite_iTRAQ.cmpd.rclb.mgf	77.82	472	4	0	0.0051	0	2	SVGK	HGLTLTGDYGSIHVDR	EGNY	MOD:01485 H1	0	1972	Q2K708	Q2K708{428-443}	0	0.0001	0.0002	Q2K708	71.03						47.4385
10475@20170914_03_MJLorite_iTRAQ.cmpd.rclb.mgf	43.23	696.865	2	1	-0.0067	0	2	SKAR	VTEGTDGSINVR	HANG	MOD:01485 V1	0	10221	Q2K9F8	Q2K9F8{111-122}	0	0.0001	0.0002	Q2K9F8	61.2						134.63
29444@20170914_03_MJLorite_iTRAQ.cmpd.rclb.mgf	98.93	556.047	4	0	-0.0011	0	2	VGAR	FAELGTAPSSDADATPAALK	AKLE	MOD:01485 F1;MOD:01485 K20	0	8013	Q2K4P7	Q2K4P7{286-305}	0	0.0001	0.0002	Q2K4P7	86.07						80.3605
49768@20170914_03_MJLorite_iTRAQ.cmpd.rclb.mgf	158.55	810.65	4	0	0.0057	0	2	GADR	LIGGTGDDTYIVDNAGDLVTEAADAGTDTVR	TALS	MOD:01485 L1	0	6947	Q2KC97	Q2KC97{945-975,1548-1578}	0	0.0001	0.0002	Q2KC97	124						121.944
23636@20170914_03_MJLorite_iTRAQ.cmpd.rclb.mgf	81.88	566.033	4	0	0.0056	0	2	GVFK	IGTEGTYAPFTYHDESGK	LVGF	MOD:01485 I1;MOD:01485 K18	0	4137	Q2K336	Q2K336{38-55}	0	0.0001	0.0002	Q2K336	60.53						75.6661
54699@20170914_03_MJLorite_iTRAQ.cmpd.rclb.mgf	174.75	785.398	4	0	0.0022	0	2	LNVK	SALELSGASVCVQSGTTTELNLADYFK	ANNL	MOD:00110 C11;MOD:01485 S1;MOD:01485 K27	0	6573	Q2K902	Q2K902{146-172}	0	0.0001	0.0002	Q2K902	102.62						105.407
48576@20170914_03_MJLorite_iTRAQ.cmpd.rclb.mgf	155.03	770.397	4	0	0	0	2	QEVK	IGYDGIVFATDSSNPDVAYVPADIYK	ALAA	MOD:01485 Y3;MOD:01485 K26	0	7138	Q2KCV8	Q2KCV8{109-134}	0	0.0001	0.0002	Q2KCV8	99.63						93.7755
44330@20170914_03_MJLorite_iTRAQ.cmpd.rclb.mgf	142.63	599.088	4	0	0.0041	0	2	REYK	VSFLAPLGLSTESEASAAGVAK	LIEQ	MOD:01485 V1;MOD:01485 K22	0	10479	Q2KBK4	Q2KBK4{205-226}	0	0.0001	0.0002	Q2KBK4	96.88						75.0688
54444@20170914_03_MJLorite_iTRAQ.cmpd.rclb.mgf	173.98	1046.86	3	0	0.0062	0	2	LNVK	SALELSGASVCVQSGTTTELNLADYFK	ANNL	MOD:00110 C11;MOD:01485 S1;MOD:01485 K27	0	6573	Q2K902	Q2K902{146-172}	0	0.0001	0.0002	Q2K902	84.05						145.034
49513@20170914_03_MJLorite_iTRAQ.cmpd.rclb.mgf	157.82	638.339	4	0	-0.0006	1	2	SISK	RIELQENFVSALSDSIDSGIGR	LVDA	MOD:01485 R1	0	5239	Q2KCF0	Q2KCF0{238-259}	0	0.0001	0.0002	Q2KCF0	62.6						78.5516
36069@20170914_03_MJLorite_iTRAQ.cmpd.rclb.mgf	118.37	475.497	4	0	0.0015	0	2	KSGK	AIGWEYDAMNEIAK	RLNF	MOD:01485 A1;MOD:01485 K14	0	1188	Q2K378	Q2K378{55-68}	0	0.0001	0.0002	Q2K378	63.65						63.2273
59017@20170914_03_MJLorite_iTRAQ.cmpd.rclb.mgf	188.1	650.884	4	0	0.0024	0	2	ANPK	LVGVFASNLILAQGVGQAIAENK	LGDK	MOD:01485 L1;MOD:01485 K23	0	8759	Q2KCX3	Q2KCX3{224-246}	0	0.0001	0.0002	Q2KCX3	104.58						86.5845
62713@20170914_03_MJLorite_iTRAQ.cmpd.rclb.mgf	199.12	838.815	3	1	-0.0222	0	2	VSSK	IDTEGTLLGNVIALALEANGIK	TQDR	MOD:01485 I1;MOD:01485 K22	0	8956	Q2KCY0	Q2KCY0{30-51}	0	0.0001	0.0002	Q2KCY0	60.77						118.304
64897@20170914_03_MJLorite_iTRAQ.cmpd.rclb.mgf	234.53	584.591	4	0	-0.0047	0	2	TDAK	VDAVLSPYDGLSIGIISSLK	GVGY	MOD:01485 V1;MOD:01485 K20	0	5613	Q2K5F5	Q2K5F5{229-248}	0	0.0001	0.0002	Q2K5F5	67.45						82.6007
62734@20170914_03_MJLorite_iTRAQ.cmpd.rclb.mgf	199.18	778.196	4	0	0.0048	0	2	ALEK	AGILPLAVGGQPWQAAGAFDVLMVAIAGK	DTFN	MOD:01485 A1;MOD:01485 K29	0	2233	Q2K7E8	Q2K7E8{175-203}	0	0.0001	0.0002	Q2K7E8	72.74						105.416
39178@20170914_03_MJLorite_iTRAQ.cmpd.rclb.mgf	127.45	815.162	4	0	0.0027	0	2	QPPK	QLGSIEFDQNGNAIGGSVDENATIGSGPIPR	ANSG	MOD:01485 Q1	0	4009	Q2K4M0	Q2K4M0{80-110}	0	0.0001	0.0002	Q2K4M0	66.89						115.259
39416@20170914_03_MJLorite_iTRAQ.cmpd.rclb.mgf	128.18	552.111	5	0	0.0062	0	2	SSLK	GVGYGTAAQPLPIVTGQDAEIPSVK	SIIA	MOD:01485 G1;MOD:01485 K25	0	5613	Q2K5F5	Q2K5F5{249-273}	0	0.0001	0.0002	Q2K5F5	68.23						71.984
47599@20170914_03_MJLorite_iTRAQ.cmpd.rclb.mgf	152.18	572.303	4	0	0.0021	0	2	GAAK	VDTAYTAMDSAIDVVGEIK	AKLV	MOD:01485 V1;MOD:01485 K19	0	5239	Q2KCF1	Q2KCF1{74-92}	0	0.0001	0.0002	Q2KCF1	75.92						72.0674
55191@20170914_03_MJLorite_iTRAQ.cmpd.rclb.mgf	176.18	852.948	4	0	0.005	0	2	DWTK	ATITLEGAYAPWNLTNADGTLGGFEPELAK	VLCE	MOD:01485 A1;MOD:01485 K30	0	1971	Q2K072	Q2K072{29-58}	0	0.0001	0.0002	Q2K072	67.15						136.748
29882@20170914_03_MJLorite_iTRAQ.cmpd.rclb.mgf	100.22	751.367	4	0	0.0085	0	2	DAAK	AMVDQGVDVLTQHTDTTAPMQVAEER	GIHA	MOD:01485 A1;MOD:00719 M2	0	10500	Q2K8G8	Q2K8G8{204-229}	0	0.0001	0.0002	Q2K8G8	125.93						129.907
58743@20170914_03_MJLorite_iTRAQ.cmpd.rclb.mgf	187.3	692.388	3	0	0.0088	0	2	ASGR	IDYVFGDSLALDAFLK	SDGG	MOD:01485 I1;MOD:01485 K16	0	876	Q2K1K6	Q2K1K6{173-188}	0	0.0001	0.0002	Q2K1K6	80.32						105.385
52509@20170914_03_MJLorite_iTRAQ.cmpd.rclb.mgf	168.03	640.037	3	0	-0.0013	0	2		TSILTNVAAMAALQTLR	GIND	MOD:01485 T1	0	5239	Q2KCE9	Q2KCE9{2-18}	0	0.0001	0.0002	Q2KCE9	66.95						110.317
51122@20170914_03_MJLorite_iTRAQ.cmpd.rclb.mgf	162.53	929.215	4	0	0.0075	0	2	NIVK	QLQAAGYGTDLQYGDDDIPNQLSQIENMVTK	GVKV	MOD:01485 Q1;MOD:01485 K31	0	5613	Q2K5F5	Q2K5F5{52-82}	0	0.0001	0.0002	Q2K5F5	140.02						123.327
61753@20170914_03_MJLorite_iTRAQ.cmpd.rclb.mgf	196.28	833.952	4	0	0.0003	0	2	ATGK	AITDVINIGIGGSDLGPVMATLALAPFHDGPR	AHFV	MOD:01485 A1	0	1124	Q2KCY8	Q2KCY8{138-169}	0	0.0001	0.0002	Q2KCY8	82.11						79.6958
56782@20170914_03_MJLorite_iTRAQ.cmpd.rclb.mgf	181.52	855.257	5	0	0.0152	0	2	VDAK	YSSSENYEQQIVIDTQAGSPPNVAILPQPGLLADLAGK	GFLT	MOD:01485 Y1;MOD:01485 K38	0	4702	Q2KCC4	Q2KCC4{85-122}	0	0.0001	0.0002	Q2KCC4	58.91						94.5375
64907@20170914_03_MJLorite_iTRAQ.cmpd.rclb.mgf	234.68	623.821	4	0	0.0034	0	2	DESK	TNYGYTVGAGVEAFVTNNITTR	LEYR	MOD:01485 T1	0	5698	Q2KA52	Q2KA52{153-174}	0	0.0001	0.0002	Q2KA52	80.14						74.9547
48826@20170914_03_MJLorite_iTRAQ.cmpd.rclb.mgf	155.77	579.816	4	0	0.0015	0	2	IFKK	EAPWATLDHSLVFVPMSK	KVSG	MOD:01485 E1;MOD:01485 K18	0	474	Q2KC86	Q2KC86{492-509}	0	0.0001	0.0002	Q2KC86	66.54						77.1597
50207@20170914_03_MJLorite_iTRAQ.cmpd.rclb.mgf	159.85	707.363	4	0	-0.0017	0	2	VVRK	AITAGEIDIYPEYTGNAGFFFNK	ADDA	MOD:01485 A1;MOD:01485 K23	0	8956	Q2KCY0	Q2KCY0{67-89}	0	0.0001	0.0002	Q2KCY0	96.32						96.1085
23123@20170914_03_MJLorite_iTRAQ.cmpd.rclb.mgf	80.38	572.306	4	0	-0.0018	0	2	QLQK	GAEQAAADINAAGGINGEQIK	IELG	MOD:01485 G1;MOD:01485 K21	0	3055	Q2K502	Q2K502{47-67}	0	0.0001	0.0002	Q2K502	96.6						90.4334
53274@20170914_03_MJLorite_iTRAQ.cmpd.rclb.mgf	170.55	1116.84	4	1	0.0194	0	2	MQER	ITTTTTGSITSVQAIYVPADDLTDPAPATSFAHLDATTVLSR	SIAE	MOD:01485 I1	0	8381	Q2K3H0	Q2K3H0{295-336}	0	0.0001	0.0002	Q2K3H0	59.58						137.31
50303@20170914_03_MJLorite_iTRAQ.cmpd.rclb.mgf	160.13	707.363	4	0	-0.0017	0	2	VVRK	AITAGEIDIYPEYTGNAGFFFNK	ADDA	MOD:01485 A1;MOD:01485 K23	0	8956	Q2KCY0	Q2KCY0{67-89}	0	0.0001	0.0002	Q2KCY0	87.43						93.7931
26352@20170914_03_MJLorite_iTRAQ.cmpd.rclb.mgf	89.87	490.517	4	0	-0.0011	0	2	AEER	GIHAFGQASDMIAAGPK	AQLT	MOD:01485 G1;MOD:01485 K17	0	10500	Q2K8G8	Q2K8G8{230-246}	0	0.0001	0.0002	Q2K8G8	69.41						55.919
54598@20170914_03_MJLorite_iTRAQ.cmpd.rclb.mgf	174.45	618.563	4	0	0.001	0	2	AEMK	AECSFVSTDWDGIIPALNAK	KFDM	MOD:00110 C3;MOD:01485 A1;MOD:01485 K20	0	3015	Q2K7J0	Q2K7J0{67-86}	0	0.0001	0.0002	Q2K7J0	64.15						81.7375
6428@20170914_03_MJLorite_iTRAQ.cmpd.rclb.mgf	31.38	365.2	4	0	0.001	0	2		ASTNFRPLHDR	VVVR	MOD:01485 A1	0	2834	Q2KBZ6	Q2KBZ6{2-12}	0	0.0001	0.0002	Q2KBZ6	66.13						43.7265
39421@20170914_03_MJLorite_iTRAQ.cmpd.rclb.mgf	128.18	604.579	4	0	0.0074	0	2	KANK	GNTGPQAPDVIDVGLSFGPSAK	KDGL	MOD:01485 G1;MOD:01485 K22	0	2394	Q2K678	Q2K678{89-110}	0	0.0001	0.0002	Q2K678	59.47						72.4178
35001@20170914_03_MJLorite_iTRAQ.cmpd.rclb.mgf	115.23	652.585	4	0	0.0068	0	2	FKAK	YGLEVNELNPDAGSGDEVEAIK	ANKG	MOD:01485 Y1;MOD:01485 K22	0	2394	Q2K678	Q2K678{64-85}	0	0.0001	0.0002	Q2K678	74.48						80.9603
34048@20170914_03_MJLorite_iTRAQ.cmpd.rclb.mgf	112.45	747.368	4	0	0.0074	0	2	DAAK	AMVDQGVDVLTQHTDTTAPMQVAEER	GIHA	MOD:01485 A1	0	10500	Q2K8G8	Q2K8G8{204-229}	0	0.0001	0.0002	Q2K8G8	132.37						122.231
46969@20170914_03_MJLorite_iTRAQ.cmpd.rclb.mgf	150.35	589.543	4	0	-0.0006	0	2	LSSR	IDSQEDFVSALSDSIDSGIGR	LVDA	MOD:01485 I1	0	5239	Q2KCF1	Q2KCF1{239-259}	0	0.0001	0.0002	Q2KCF1	72.55						79.7395
45942@20170914_03_MJLorite_iTRAQ.cmpd.rclb.mgf	147.35	809.686	4	0	0.0061	1	2	DAFK	ATLNAGGITEVVNDAITPGDKDFSALTTR	IKSE	MOD:01485 A1;MOD:01485 K21	0	5167	Q2K5M7	Q2K5M7{181-209}	0	0.0001	0.0002	Q2K5M7	69.74						95.381
10175@20170914_03_MJLorite_iTRAQ.cmpd.rclb.mgf	42.35	662.314	4	0	0.0119	0	2	QYGR	HNLSAVGQEGNDNYGATYQHGNR	NVAG	MOD:01485 H1	0	2383	Q2K0F5	Q2K0F5{69-91}	0	0.0001	0.0002	Q2K0F5	66.16						71.4711
55986@20170914_03_MJLorite_iTRAQ.cmpd.rclb.mgf	178.67	584.593	4	0	0.0039	0	2	TDAK	VDAVLSPYDGLSIGIISSLK	GVGY	MOD:01485 V1;MOD:01485 K20	0	5613	Q2K5F5	Q2K5F5{229-248}	0	0.0001	0.0002	Q2K5F5	89.81						83.9934
52354@20170914_03_MJLorite_iTRAQ.cmpd.rclb.mgf	167	640.037	3	0	-0.0001	0	2		TSILTNVAAMAALQTLR	GIND	MOD:01485 T1	0	5239	Q2KCE9	Q2KCE9{2-18}	0	0.0001	0.0002	Q2KCE9	87.78						111.36
20682@20170914_03_MJLorite_iTRAQ.cmpd.rclb.mgf	73.22	495.273	4	0	0.0024	0	2	RSLK	IGDELGGHIVSGHVDGK	AEIL	MOD:01485 I1;MOD:01485 K17	0	8848	Q2KA22	Q2KA22{94-110}	0	0.0001	0.0002	Q2KA22	60.07						86.5103
60363@20170914_03_MJLorite_iTRAQ.cmpd.rclb.mgf	192.07	849.194	4	0	0.0006	0	2	GGNK	VSEMSLTIYGDTIADGQHISLAALGAVDFVR	FDIQ	MOD:01485 V1	0	6636	Q2K890	Q2K890{219-249}	0	0.0001	0.0002	Q2K890	74.14						118.73
56559@20170914_03_MJLorite_iTRAQ.cmpd.rclb.mgf	180.87	710.371	4	0	0.0141	0	2	EKFK	AAGFNPEAYTLYSYAAMQAIAGAAK	AAGS	MOD:01485 A1;MOD:01485 K25	0	3055	Q2K502	Q2K502{289-313}	0	0.0001	0.0002	Q2K502	64.01						96.6138
43925@20170914_03_MJLorite_iTRAQ.cmpd.rclb.mgf	141.43	725.134	4	0	0.002	0	2	ADLK	AANEGGTLFGSLAQGYGAPPAIANAYK	DVVS	MOD:01485 A1;MOD:01485 K27	0	456	Q2K9G8	Q2K9G8{365-391}	0	0.0001	0.0002	Q2K3X2;Q2K9G8	87.21						102.712
43802@20170914_03_MJLorite_iTRAQ.cmpd.rclb.mgf	141.07	725.134	4	0	0.0014	0	2	ADLK	AANEGGTLFGSLAQGYGAPPAIANAYK	DVVS	MOD:01485 A1;MOD:01485 K27	0	456	Q2K9G8	Q2K9G8{365-391}	0	0.0001	0.0002	Q2K3X2;Q2K9G8	95.57						105.365
56544@20170914_03_MJLorite_iTRAQ.cmpd.rclb.mgf	180.82	888.933	4	0	0.0115	0	2	NIVK	QLQAAGYGTDLQYGDDDIPNQLSQIENMVTK	GVKV	MOD:00040 Q1;MOD:01485 K31	0	5613	Q2K5F5	Q2K5F5{52-82}	0	0.0001	0.0002	Q2K5F5	61.58						93.4143
57404@20170914_03_MJLorite_iTRAQ.cmpd.rclb.mgf	183.35	755.64	4	0	0.01	0	2	KTSK	NHGAAYIASFPIPEVVMGINSFEQGAR	SVDP	MOD:01485 N1	0	10500	Q2K8G8	Q2K8G8{150-176}	0	0.0001	0.0002	Q2K8G8	80.72						74.5281
41241@20170914_03_MJLorite_iTRAQ.cmpd.rclb.mgf	133.55	574.557	4	0	0.0062	0	2	QYLK	SSSQDSAQQTLLSGLEDLK	SIMG	MOD:01485 S1;MOD:01485 K19	0	3383	Q2KCE0	Q2KCE0{70-88}	0	0.0001	0.0002	Q2KCE0	67.15						88.0781
55133@20170914_03_MJLorite_iTRAQ.cmpd.rclb.mgf	176.02	945.976	4	0	0.0082	0	2		AIHATDDTATFLETDVISGNLLSNDTSDGNLFLR	AFDQ	MOD:01485 A1	0	5138	Q2K591	Q2K591{2-35}	0	0.0001	0.0002	Q2K591	90.8						125.002
32823@20170914_03_MJLorite_iTRAQ.cmpd.rclb.mgf	108.83	841.424	2	0	0.0065	0	2		ADNFNFELVSPER	LLLS	MOD:01485 A1	0	9389	Q2K3H1	Q2K3H1{2-14}	0	0.0001	0.0002	Q2K3H1	60.59						159.346
56697@20170914_03_MJLorite_iTRAQ.cmpd.rclb.mgf	181.27	906.217	4	0	0.0048	0	2	RLIR	DSANVDYYATFDNFQVGVLQANSIVDGLGLK	DGKG	MOD:01485 D1;MOD:01485 K31	0	5613	Q2K5F5	Q2K5F5{120-150}	0	0.0001	0.0002	Q2K5F5	64.25						99.6992
50025@20170914_03_MJLorite_iTRAQ.cmpd.rclb.mgf	159.32	701.397	4	0	-0.0027	1	2	LIAK	MKEAGVSIIYWGGLHTEAGLIIR	QAAD	MOD:01485 M1;MOD:01485 K2	0	3055	Q2K502	Q2K502{211-233}	0	0.0001	0.0002	Q2K502	73.46						71.1414
39916@20170914_03_MJLorite_iTRAQ.cmpd.rclb.mgf	129.67	474.27	4	0	-0.0022	0	2	AFAK	AMLPGQPVGGGFFTVK	NNGK	MOD:01485 A1;MOD:01485 K16	0	4430	Q2K817	Q2K817{235-250}	0	0.0001	0.0002	Q2K817	60.08						65.2832
44943@20170914_03_MJLorite_iTRAQ.cmpd.rclb.mgf	144.42	733.382	4	0	0.0045	0	2	GAGR	VANADPDGYTVLLHHIGMATSATLYR	KLAY	MOD:01485 V1	0	8013	Q2K4P7	Q2K4P7{81-106}	0	0.0001	0.0002	Q2K4P7	112.1						111.689
28819@20170914_03_MJLorite_iTRAQ.cmpd.rclb.mgf	97.1	559.551	4	1	0.0034	1	2	CCAK	MGDVADDKEVLGAGVSGGLR	KEDT	MOD:01485 M1;MOD:01485 K8	0	876	Q2K1K6	Q2K1K6{199-218}	0	0.0001	0.0002	Q2K1K6	74.76						67.5621
49539@20170914_03_MJLorite_iTRAQ.cmpd.rclb.mgf	157.88	614.086	4	0	-0.0026	0	2	GNVK	SLVYVAAFAPEAGESVADLAGK	FPGG	MOD:01485 S1;MOD:01485 K22	0	1676	Q2K6P0	Q2K6P0{107-128}	0	0.0001	0.0002	Q2K6P0	66.41						82.9095
39244@20170914_03_MJLorite_iTRAQ.cmpd.rclb.mgf	127.67	552.111	5	0	0.0063	0	2	SSLK	GVGYGTAAQPLPIVTGQDAEIPSVK	SIIA	MOD:01485 G1;MOD:01485 K25	0	5613	Q2K5F5	Q2K5F5{249-273}	0	0.0001	0.0002	Q2K5F5	67.4						75.9677
47724@20170914_03_MJLorite_iTRAQ.cmpd.rclb.mgf	152.55	645.371	3	0	0.0058	0	2		TSILTNVAAMAALQTLR	GIND	MOD:01485 T1;MOD:00719 M10	0	5239	Q2KCE9	Q2KCE9{2-18}	0	0.0001	0.0002	Q2KCE9	61.57						104.631
38933@20170914_03_MJLorite_iTRAQ.cmpd.rclb.mgf	126.73	689.886	4	0	0.0045	0	2	SSLK	GVGYGTAAQPLPIVTGQDAEIPSVK	SIIA	MOD:01485 G1;MOD:01485 K25	0	5613	Q2K5F5	Q2K5F5{249-273}	0	0.0001	0.0002	Q2K5F5	83.21						92.4739
62562@20170914_03_MJLorite_iTRAQ.cmpd.rclb.mgf	198.67	753.426	4	0	-0.0007	0	2	RMRK	FFEEVALLSQSFVINPDLTVAAAIK	EAEK	MOD:01485 F1;MOD:01485 K25	0	6902	Q2K8Y6	Q2K8Y6{243-267}	0	0.0001	0.0002	Q2K8Y6	64.71						109.3
61744@20170914_03_MJLorite_iTRAQ.cmpd.rclb.mgf	196.27	720.896	4	0	0.001	0	2	QTIR	FAVGLEEPELLWNDLQQALHAAK	R	MOD:01485 F1;MOD:01485 K23	0	7001	Q2JYI5	Q2JYI5{372-394}	0	0.0001	0.0002	Q2JYI5	97.6						94.7443
27526@20170914_03_MJLorite_iTRAQ.cmpd.rclb.mgf	93.3	585.996	3	0	-0.0045	0	2	IFMK	ATSAISGPNDTVLIPR	GSEK	MOD:01485 A1	0	9964	Q2KE87	Q2KE87{100-115}	0	0.0001	0.0002	Q2KE87	71.02						92.9307
33779@20170914_03_MJLorite_iTRAQ.cmpd.rclb.mgf	111.65	747.368	4	0	0.0074	0	2	DAAK	AMVDQGVDVLTQHTDTTAPMQVAEER	GIHA	MOD:01485 A1	0	10500	Q2K8G8	Q2K8G8{204-229}	0	0.0001	0.0002	Q2K8G8	140.19						124.256
54937@20170914_03_MJLorite_iTRAQ.cmpd.rclb.mgf	175.45	701.636	4	0	0.003	0	2	NLRR	SIALSVEDGVVATYIHNAVSDGLGK	LGVL	MOD:01485 S1;MOD:01485 K25	0	6902	Q2K8Y6	Q2K8Y6{142-166}	0	0.0001	0.0002	Q2K8Y6	133.09						124.062
38094@20170914_03_MJLorite_iTRAQ.cmpd.rclb.mgf	124.28	678.129	4	0	0.0017	0	2	LLQK	DPSINVIHTINEPAAVGAYQALK	AVGM	MOD:01485 D1;MOD:01485 K23	0	5517	Q2KD00	Q2KD00{222-244}	0	0.0001	0.0002	Q2KD00	102.48						92.0358
51737@20170914_03_MJLorite_iTRAQ.cmpd.rclb.mgf	164.45	929.214	4	0	0.0016	0	2	NIVK	QLQAAGYGTDLQYGDDDIPNQLSQIENMVTK	GVKV	MOD:01485 Q1;MOD:01485 K31	0	5613	Q2K5F5	Q2K5F5{52-82}	0	0.0001	0.0002	Q2K5F5	125.05						141.424
56683@20170914_03_MJLorite_iTRAQ.cmpd.rclb.mgf	181.23	774.808	5	0	0.0086	0	2	DTVR	TTLASYTLGSDLENLTYSGTVAFTGTGNSLANTIK	GGAG	MOD:01485 T1;MOD:01485 K35	0	6947	Q2KC97	Q2KC97{546-580,1149-1183}	0	0.0001	0.0002	Q2KC97	84.46						101.025
53790@20170914_03_MJLorite_iTRAQ.cmpd.rclb.mgf	172.08	631.033	3	0	-0.0075	0	2	TDQK	TVEIVEMVLAGSINK	EIVA	MOD:01485 T1;MOD:01485 K15	0	7194	Q2KD36	Q2KD36{94-108}	0	0.0001	0.0002	Q2KD36	58.9						93.5856
41358@20170914_03_MJLorite_iTRAQ.cmpd.rclb.mgf	133.9	564.83	4	0	0.0026	0	2	IMEK	VGVIPQQIAGGDIYPALEK	GTID	MOD:01485 V1;MOD:01485 K19	0	2578	Q2K462	Q2K462{192-210}	0	0.0001	0.0002	Q2K462	59.15						74.0045
60643@20170914_03_MJLorite_iTRAQ.cmpd.rclb.mgf	192.88	1039.8	4	0	0.0068	0	2	QGLK	ATLVSGDGIVSNELASIAGDAVAGTLNTFGPDPTLNPANK	ELVE	MOD:01485 A1;MOD:01485 K40	0	3055	Q2K502	Q2K502{242-281}	0	0.0001	0.0002	Q2K502	63.09						132.85
51267@20170914_03_MJLorite_iTRAQ.cmpd.rclb.mgf	163	695.869	4	1	0.0128	0	2	ALAR	AGVDAGEVDEVILGQVLAAGEGQNPAR	QAAI	MOD:01485 A1	0	8991	Q2K324	Q2K324{43-69}	0	0.0001	0.0002	Q2K324	63.71						79.0288
33653@20170914_03_MJLorite_iTRAQ.cmpd.rclb.mgf	111.28	607.315	4	0	0.0096	0	2	AWPK	AEFHLIEGAGHAYSEPGILDR	LIRA	MOD:01485 A1	0	2776	Q2KAB3	Q2KAB3{287-307}	0	0.0001	0.0002	Q2KAB3	66.08						98.458
37325@20170914_03_MJLorite_iTRAQ.cmpd.rclb.mgf	122.03	915.475	3	0	0.0111	0	2	PFKK	EGGTVTAGNASGVNDGAAALIVASEAAAR	KYGL	MOD:01485 E1	0	9129	Q2K0J2	Q2K0J2{244-272}	0	0.0001	0.0002	Q2K0J2	68.07						146.887
44651@20170914_03_MJLorite_iTRAQ.cmpd.rclb.mgf	143.57	820.656	4	0	-0.0008	0	2	FHVK	ADGSFTYDLASDIAPGDHITETIQYYK	ISDG	MOD:01485 A1;MOD:01485 K27	0	5138	Q2K591	Q2K591{181-207}	0	0.0001	0.0002	Q2K591	97.23						101.039
27698@20170914_03_MJLorite_iTRAQ.cmpd.rclb.mgf	93.82	439.01	4	0	0.0004	0	2	RGVK	IIGISVDPVESHAK	WKGD	MOD:01485 I1;MOD:01485 K14	0	6268	Q2K9A0	Q2K9A0{66-79}	0	0.0001	0.0002	Q2K9A0	58.75						52.1169
22628@20170914_03_MJLorite_iTRAQ.cmpd.rclb.mgf	78.93	455.492	4	0	0.0017	0	2	TNYK	QILVDSGYYTEDK	LK	MOD:01485 Q1;MOD:01485 K13	0	5613	Q2K5F5	Q2K5F5{340-352}	0	0.0001	0.0002	Q2K5F5	60.23						48.6972
38136@20170914_03_MJLorite_iTRAQ.cmpd.rclb.mgf	124.4	1030.84	3	0	0.0257	0	2	AVFR	NADAATGGTTSFPYTGGAGAVVASGNLTFDR	NGKM	MOD:01485 N1	0	1654	Q2KCE1	Q2KCE1{240-270}	0	0.0001	0.0002	Q2KCE1	129.17						181.517
64809@20170914_03_MJLorite_iTRAQ.cmpd.rclb.mgf	210.43	906.217	4	0	0.0065	0	2	RLIR	DSANVDYYATFDNFQVGVLQANSIVDGLGLK	DGKG	MOD:01485 D1;MOD:01485 K31	0	5613	Q2K5F5	Q2K5F5{120-150}	0	0.0001	0.0002	Q2K5F5	61.78						111.246
54081@20170914_03_MJLorite_iTRAQ.cmpd.rclb.mgf	172.93	916.164	3	0	0.0039	0	2	RGLK	NANTPVWTTLLLGYGSSPLGPDGK	LRTT	MOD:01485 N1;MOD:01485 K24	0	376	Q2JZJ7	Q2JZJ7{211-234}	0	0.0001	0.0002	Q2JZJ7	80.93						158.423
24420@20170914_03_MJLorite_iTRAQ.cmpd.rclb.mgf	84.18	640.685	3	0	0.0091	0	2		TSINTNSSAQAALQTLR	NVNQ	MOD:01485 T1	0	5239	Q2KCF1	Q2KCF1{2-18}	0	0.0001	0.0002	Q2KCF1	90.88						105.009
33063@20170914_03_MJLorite_iTRAQ.cmpd.rclb.mgf	109.55	728.049	3	1	0.0086	0	2	ENLK	ISNTGGAGIYGGNVTNWTVR	DVEI	MOD:01485 I1	0	1972	Q2K708	Q2K708{100-119}	0	0.0001	0.0002	Q2K708	61.61						90.1462
55316@20170914_03_MJLorite_iTRAQ.cmpd.rclb.mgf	176.57	566.334	4	1	-0.0117	0	2	NTGR	IIAGGVAAGVVGGLIGGAIANGGPR	YVDE	MOD:01485 I1	0	8825	Q2K013	Q2K013{36-60}	0	0.0001	0.0002	Q2K013	61.34						88.2338
34075@20170914_03_MJLorite_iTRAQ.cmpd.rclb.mgf	112.52	625.586	4	0	0.0025	0	2	IQVR	LGEHNIDVLEGNEQFINAAK	IITH	MOD:01485 L1;MOD:01485 K20	0	450	P00761	P00761{58-77}	0	0.0001	0.0002	P00761	65.74						61.2829
35808@20170914_03_MJLorite_iTRAQ.cmpd.rclb.mgf	117.6	645.349	3	0	0.0033	0	2		TSINTNNAAMAALQTLR	GINQ	MOD:01485 T1	0	5239	Q2KCF0	Q2KCF0{2-18}	0	0.0001	0.0002	Q2KCF0	85.6						111.923
53778@20170914_03_MJLorite_iTRAQ.cmpd.rclb.mgf	172.03	858.487	3	1	-0.0226	0	2	DPAK	ADAIGGFLVENGILVDANGVVLK	EKPD	MOD:01485 A1;MOD:01485 K23	0	9495	Q2K3H4	Q2K3H4{299-321}	0	0.0001	0.0002	Q2K3H4	81.79						142.579
7023@20170914_03_MJLorite_iTRAQ.cmpd.rclb.mgf	33.12	522.514	4	0	0.0046	0	2	KWQK	DTGETVTIQASHGGSGAQAR	SVID	MOD:01485 D1	0	5704	Q2K0P9	Q2K0P9{59-78}	0	0.0001	0.0002	Q2K0P9	62.3						89.5899
44359@20170914_03_MJLorite_iTRAQ.cmpd.rclb.mgf	142.72	599.088	4	0	0.0041	0	2	REYK	VSFLAPLGLSTESEASAAGVAK	LIEQ	MOD:01485 V1;MOD:01485 K22	0	10479	Q2KBK4	Q2KBK4{205-226}	0	0.0001	0.0002	Q2KBK4	99.27						77.3955
33869@20170914_03_MJLorite_iTRAQ.cmpd.rclb.mgf	111.92	747.368	4	0	0.0074	0	2	DAAK	AMVDQGVDVLTQHTDTTAPMQVAEER	GIHA	MOD:01485 A1	0	10500	Q2K8G8	Q2K8G8{204-229}	0	0.0001	0.0002	Q2K8G8	144.32						124.256
43176@20170914_03_MJLorite_iTRAQ.cmpd.rclb.mgf	139.23	771.673	4	0	0.0041	0	2	YTIR	EALHSVGLPSDSANQVVVPGPQLEQVLR	SKQV	MOD:01485 E1	0	6679	Q2K1L1	Q2K1L1{150-177}	0	0.0001	0.0002	Q2K1L1	58.29						88.311
62833@20170914_03_MJLorite_iTRAQ.cmpd.rclb.mgf	199.47	778.196	4	0	0.0048	0	2	ALEK	AGILPLAVGGQPWQAAGAFDVLMVAIAGK	DTFN	MOD:01485 A1;MOD:01485 K29	0	2233	Q2K7E8	Q2K7E8{175-203}	0	0.0001	0.0002	Q2K7E8	58.36						96.5863
32467@20170914_03_MJLorite_iTRAQ.cmpd.rclb.mgf	107.8	474.247	4	0	0.0042	0	2	GAGK	DIMTGGTSSDTFVFK	TATE	MOD:01485 D1;MOD:01485 K15	0	8866	Q2K908	Q2K908{588-602}	0	0.0001	0.0002	Q2K908	58.31						52.3125
43005@20170914_03_MJLorite_iTRAQ.cmpd.rclb.mgf	138.73	1214.61	3	0	0.0188	1	2	GNVK	VSDGTSDESKTNYGYTVGAGVEAFVTNNITTR	LEYR	MOD:01485 V1;MOD:01485 Y13	0	5698	Q2KA52	Q2KA52{143-174}	0	0.0001	0.0002	Q2KA52	58.37						135.138
52632@20170914_03_MJLorite_iTRAQ.cmpd.rclb.mgf	168.68	806.798	3	0	-0.0126	0	2	NKNK	VLVSLIGQGYYGTITPPVIQR	NILE	MOD:01485 V1	0	1202	Q2K813	Q2K813{84-104}	0	0.0001	0.0002	Q2K813	58.09						106.451
50110@20170914_03_MJLorite_iTRAQ.cmpd.rclb.mgf	159.57	630.342	4	0	-0.0027	0	2	TTVR	ELLGAIEDVSNRPFPVEYIGR	REGD	MOD:01485 E1	0	846	Q2K357	Q2K357{263-283}	0	0.0001	0.0002	Q2K357	58.14						96.2392
35011@20170914_03_MJLorite_iTRAQ.cmpd.rclb.mgf	115.27	837.676	4	0	0.0079	1	2	DLGR	QQVQAEFGDKIETPYLENVPEGPDAER	AIER	MOD:01485 Q1;MOD:01485 Y15	0	10500	Q2K8G8	Q2K8G8{52-78}	0	0.0001	0.0002	Q2K8G8	58.23						126.172
42933@20170914_03_MJLorite_iTRAQ.cmpd.rclb.mgf	138.52	737.38	4	0	0.0014	0	2	GAGR	VANADPDGYTVLLHHIGMATSATLYR	KLAY	MOD:01485 V1;MOD:00719 M18	0	8013	Q2K4P7	Q2K4P7{81-106}	0	0.0001	0.0002	Q2K4P7	58.11						126.425
42397@20170914_03_MJLorite_iTRAQ.cmpd.rclb.mgf	136.95	787.097	3	0	-0.0064	0	2	TGIK	VETSWEQNITAADALVVPK	GAPN	MOD:01485 V1;MOD:01485 K19	0	3908	Q2K171	Q2K171{236-254}	0	0.0001	0.0002	Q2K171	58.23						94.3387
42140@20170914_03_MJLorite_iTRAQ.cmpd.rclb.mgf	136.2	594.343	4	0	-0.0082	0	2	GGVR	VALDAILAASQPHHFPAVTK	DGQA	MOD:01485 V1;MOD:01485 K20	0	6260	Q2K7N7	Q2K7N7{195-214}	0	0.0001	0.0002	Q2K7N7	58.2						88.6975
62978@20170914_03_MJLorite_iTRAQ.cmpd.rclb.mgf	199.98	731.392	4	0	0.005	0	2	LTVK	FTLNHPEAPFLADLAMDFASIVSK	EYAD	MOD:01485 F1;MOD:01485 K24	0	474	Q2KC86	Q2KC86{161-184}	0	0.0001	0.0002	Q2KC86	58.14						71.8872
62786@20170914_03_MJLorite_iTRAQ.cmpd.rclb.mgf	199.32	971.313	4	0	-0.0008	1	2	IDEK	TIISSTGGIALDKVPETLIVVGGGVIGLELGSVWSR	LGAK	MOD:01485 T1;MOD:01485 K13	0	5902	Q2K3F8	Q2K3F8{161-196}	0	0.0001	0.0002	Q2K3F8	58.21						126.196
46719@20170914_03_MJLorite_iTRAQ.cmpd.rclb.mgf	149.62	839.675	4	0	0	1	2	QKLR	GLVSQQMTMMGTWLQTEQTDKDLAQAR	REKF	MOD:01485 G1;MOD:01485 K21	0	478	Q2K2Q6	Q2K2Q6{219-245}	0	0.0001	0.0002	Q2K2Q6	58.14						114.952
41627@20170914_03_MJLorite_iTRAQ.cmpd.rclb.mgf	134.68	534.555	4	0	0.004	0	2	IKNK	LVDLQGVDPYEASTLVK	TLET	MOD:01485 L1;MOD:01485 K17	0	8095	Q2KCD9	Q2KCD9{309-325}	0	0.0001	0.0002	Q2KCD9	58.01						59.005
25439@20170914_03_MJLorite_iTRAQ.cmpd.rclb.mgf	87.18	641.012	3	1	-0.0114	0	2		TSINTNSSAQAALQTLR	NVNQ	MOD:01485 T1	0	5239	Q2KCF1	Q2KCF1{2-18}	0	0.0001	0.0002	Q2KCF1	58.02						78.1769
56765@20170914_03_MJLorite_iTRAQ.cmpd.rclb.mgf	181.47	638.621	4	0	0.003	0	2	KTGR	SIAGNALAIGGLAAIAGLGYQAYK	NYQA	MOD:01485 S1;MOD:01485 K24	0	2196	Q2K447	Q2K447{56-79}	0	0.0001	0.0002	Q2K447	58.08						84.1549
53397@20170914_03_MJLorite_iTRAQ.cmpd.rclb.mgf	170.92	563.315	4	0	0.0043	1	2	QSNK	AADAVALFDVIETVDREK	IARA	MOD:01485 A1;MOD:01485 K18	0	2757	Q2K2S8	Q2K2S8{88-105}	0	0.0001	0.0002	Q2K2S8	57.97						60.175
31963@20170914_03_MJLorite_iTRAQ.cmpd.rclb.mgf	106.32	546.039	4	0	0.0106	0	2	ENLK	ISNTGGAGIYGGNVTNWTVR	DVEI	MOD:01485 I1	0	1972	Q2K708	Q2K708{100-119}	0	0.0001	0.0002	Q2K708	57.99						77.6545
50828@20170914_03_MJLorite_iTRAQ.cmpd.rclb.mgf	161.68	568.572	4	0	0.0028	0	2	YCAK	HNIGFIPWYPLAAGDLAK	SGSL	MOD:01485 H1;MOD:01485 K18	0	4453	Q2KD16	Q2KD16{203-220}	0	0.0001	0.0002	Q2KD16	57.94						79.8642
24288@20170914_03_MJLorite_iTRAQ.cmpd.rclb.mgf	83.8	555.018	4	0	0.0079	0	2	TPGR	MDASEAQTDAHSFAPLEPR	IDGF	MOD:01485 M1	0	5718	Q2JZT8	Q2JZT8{559-577}	0	0.0001	0.0002	Q2JZT8	57.93						89.9179
61867@20170914_03_MJLorite_iTRAQ.cmpd.rclb.mgf	196.62	751.405	3	0	0.0099	0	2	NHFR	QAPVTENLPMLLGLIGFYHR	NVLG	MOD:00040 Q1	0	1124	Q2KCY8	Q2KCY8{297-316}	0	0.0001	0.0002	Q2KCY8	57.88						77.883
25635@20170914_03_MJLorite_iTRAQ.cmpd.rclb.mgf	87.77	526.285	4	0	0.0065	1	2	TELK	LYPTADEYKLDVSSGR	VDAV	MOD:01485 Y2;MOD:01485 Y8	0	3015	Q2K7J0	Q2K7J0{160-175}	0	0.0001	0.0002	Q2K7J0	57.89						67.7582
46365@20170914_03_MJLorite_iTRAQ.cmpd.rclb.mgf	148.57	1079.24	3	0	-0.0013	1	2	DAFK	ATLNAGGITEVVNDAITPGDKDFSALTTR	IKSE	MOD:01485 A1;MOD:01485 K21	0	5167	Q2K5M7	Q2K5M7{181-209}	0	0.0001	0.0002	Q2K5M7	57.86						129.159
45473@20170914_03_MJLorite_iTRAQ.cmpd.rclb.mgf	145.97	617.095	4	0	-0.0047	0	2	PNIR	DGAAIAFAHGLNVHFGLIEPK	ASVD	MOD:01485 D1;MOD:01485 K21	0	6117	Q2K6M2	Q2K6M2{100-120}	0	0.0001	0.0002	Q2K6M2	57.87						71.4255
20223@20170914_03_MJLorite_iTRAQ.cmpd.rclb.mgf	71.87	670.303	3	0	0.014	0	2	YHVR	DHDDQSDSFFADPVNR	QALE	MOD:01485 D1	0	6264	Q2K135	Q2K135{74-89}	0	0.0001	0.0002	Q2K135	57.71						101.196
57946@20170914_03_MJLorite_iTRAQ.cmpd.rclb.mgf	184.95	750.65	4	0	-0.0007	1	2	AWEK	LPSWFVYGTGDKNIPAAALGFMAER	AGSK	MOD:01485 L1;MOD:01485 K12	0	1676	Q2K6P0	Q2K6P0{198-222}	0	0.0001	0.0002	Q2K6P0	57.77						95.3971
53308@20170914_03_MJLorite_iTRAQ.cmpd.rclb.mgf	170.67	563.314	4	0	0.0043	1	2	QSNK	AADAVALFDVIETVDREK	IARA	MOD:01485 A1;MOD:01485 K18	0	2757	Q2K2S8	Q2K2S8{88-105}	0	0.0001	0.0002	Q2K2S8	57.78						56.3103
61926@20170914_03_MJLorite_iTRAQ.cmpd.rclb.mgf	196.8	718.892	4	0	0.0114	0	2	LYRK	LAYDTLGAFEYVGLVTEVPMTIVAR	KDFE	MOD:01485 L1	0	8013	Q2K4P7	Q2K4P7{108-132}	0	0.0001	0.0002	Q2K4P7	57.77						87.582
47584@20170914_03_MJLorite_iTRAQ.cmpd.rclb.mgf	152.13	822.131	3	0	0.0055	0	2	EYNK	GNATAGLVASQGLLTNLDAYVK	KEGW	MOD:01485 G1;MOD:01485 K22	0	898	Q2K239	Q2K239{92-113}	0	0.0001	0.0002	Q2K239	57.7						120.913
15470@20170914_03_MJLorite_iTRAQ.cmpd.rclb.mgf	57.92	473.236	3	0	0.0055	0	2		TNASTESFFNR	SLAD	MOD:01485 T1	0	7228	Q2KA25	Q2KA25{2-12}	0	0.0001	0.0002	Q2KA25	57.6						70.0489
36256@20170914_03_MJLorite_iTRAQ.cmpd.rclb.mgf	118.92	560.308	4	0	0.0042	1	2	ATVR	RFDDDASTIQALVSGQVK	AVGG	MOD:01485 R1;MOD:01485 K18	0	1306	Q2K7W3	Q2K7W3{171-188}	0	0.0001	0.0002	Q2K7W3	57.66						64.6854
36190@20170914_03_MJLorite_iTRAQ.cmpd.rclb.mgf	118.73	500.515	4	0	0.0014	0	2	ALEK	GTIDAAEFVGPYDDLK	LGFH	MOD:01485 G1;MOD:01485 K16	0	2578	Q2K462	Q2K462{211-226}	0	0.0001	0.0002	Q2K462	57.61						68.8905
51477@20170914_03_MJLorite_iTRAQ.cmpd.rclb.mgf	163.68	638.339	4	0	0.0005	1	2	SISK	RIELQENFVSALSDSIDSGIGR	LVDA	MOD:01485 R1	0	5239	Q2KCF0	Q2KCF0{238-259}	0	0.0001	0.0002	Q2KCF0	57.63						57.5115
36432@20170914_03_MJLorite_iTRAQ.cmpd.rclb.mgf	119.43	581.291	4	0	0.0004	1	2	VGVK	DAADLNSDLVDPCENLRK	GTAM	MOD:00110 C13;MOD:01485 D1;MOD:01485 K18	0	3691	Q2K2P4	Q2K2P4{83-100}	0	0.0001	0.0002	Q2K2P4	57.5						58.9807
21788@20170914_03_MJLorite_iTRAQ.cmpd.rclb.mgf	76.47	440.001	4	0	0.0053	0	2	AGAK	VVILEGNPEADNAK	ERKE	MOD:01485 V1;MOD:01485 K14	0	3790	Q2KCK8	Q2KCK8{179-192}	0	0.0001	0.0002	Q2KCK8	57.56						51.9228
25846@20170914_03_MJLorite_iTRAQ.cmpd.rclb.mgf	88.38	526.285	4	0	0.0065	1	2	TELK	LYPTADEYKLDVSSGR	VDAV	MOD:01485 Y2;MOD:01485 Y8	0	3015	Q2K7J0	Q2K7J0{160-175}	0	0.0001	0.0002	Q2K7J0	57.53						61.4423
22526@20170914_03_MJLorite_iTRAQ.cmpd.rclb.mgf	78.63	549.288	4	0	-0.0019	1	2	VAVR	KDGAAVDIDGDYPETLAR	IAAN	MOD:01485 K1;MOD:01485 K1	0	7138	Q2KCV8	Q2KCV8{218-235}	0	0.0001	0.0002	Q2KCV8	57.47						53.3503
43074@20170914_03_MJLorite_iTRAQ.cmpd.rclb.mgf	138.93	643.331	4	0	0.0058	0	2	NIEK	GFDASLAGTGSSDLPDIPAEFSK	TPFV	MOD:01485 G1;MOD:01485 K23	0	7659	Q2K8D8	Q2K8D8{91-113}	0	0.0001	0.0002	Q2K8D8	57.41						90.4406
49505@20170914_03_MJLorite_iTRAQ.cmpd.rclb.mgf	157.78	1227.17	2	0	0.0016	0	2	GNVK	SLVYVAAFAPEAGESVADLAGK	FPGG	MOD:01485 S1;MOD:01485 K22	0	1676	Q2K6P0	Q2K6P0{107-128}	0	0.0001	0.0002	Q2K6P0	57.36						142.017
56075@20170914_03_MJLorite_iTRAQ.cmpd.rclb.mgf	179.03	609.834	4	0	0.0027	1	2	ASGK	SVSDTIKDAIATIGENMNLR	RSIA	MOD:01485 S1;MOD:01485 K7	0	6902	Q2K8Y6	Q2K8Y6{121-140}	0	0.0001	0.0002	Q2K8Y6	57.4						56.4201
28428@20170914_03_MJLorite_iTRAQ.cmpd.rclb.mgf	95.95	537.551	4	0	0.0042	1	2	FLPK	GQLGALDENPYKLDVAR	AKEL	MOD:01485 G1;MOD:01485 Y11	0	3376	Q2K350	Q2K350{352-368}	0	0.0001	0.0002	Q2K350	57.39						85.6157
46216@20170914_03_MJLorite_iTRAQ.cmpd.rclb.mgf	148.15	464.777	4	0	0.0023	0	2	IFPK	GSDLVGPINAAIAELK	ADGT	MOD:01485 G1;MOD:01485 K16	0	1188	Q2K378	Q2K378{230-245}	0	0.0001	0.0002	Q2K378	57.3						80.0418
48466@20170914_03_MJLorite_iTRAQ.cmpd.rclb.mgf	154.72	544.065	4	0	0.003	0	2	TEMR	IDGVFVAIGHAPATELFK	DKLK	MOD:01485 I1;MOD:01485 K18	0	8412	Q2K5Z4	Q2K5Z4{239-256}	0	0.0001	0.0002	Q2K5Z4	57.31						91.3891
46874@20170914_03_MJLorite_iTRAQ.cmpd.rclb.mgf	150.07	1119.23	3	0	-0.0093	1	2	QKLR	GLVSQQMTMMGTWLQTEQTDKDLAQAR	REKF	MOD:01485 G1;MOD:01485 K21	0	478	Q2K2Q6	Q2K2Q6{219-245}	0	0.0001	0.0002	Q2K2Q6	57.26						134.465
59498@20170914_03_MJLorite_iTRAQ.cmpd.rclb.mgf	189.52	831.427	3	0	0.0062	0	2	DESK	TNYGYTVGAGVEAFVTNNITTR	LEYR	MOD:01485 T1	0	5698	Q2KA52	Q2KA52{153-174}	0	0.0001	0.0002	Q2KA52	57.3						110.708
51799@20170914_03_MJLorite_iTRAQ.cmpd.rclb.mgf	164.63	958.514	4	0	0.0017	0	2	DGVK	FVIGHFNSGVSIPASEVYAENGILEITPAATNPK	FTER	MOD:01485 F1;MOD:01485 K34	0	3055	Q2K502	Q2K502{94-127}	0	0.0001	0.0002	Q2K502	57.25						107.713
56118@20170914_03_MJLorite_iTRAQ.cmpd.rclb.mgf	179.3	609.834	4	0	0.0027	1	2	ASGK	SVSDTIKDAIATIGENMNLR	RSIA	MOD:01485 S1;MOD:01485 K7	0	6902	Q2K8Y6	Q2K8Y6{121-140}	0	0.0001	0.0002	Q2K8Y6	57.25						62.314
42315@20170914_03_MJLorite_iTRAQ.cmpd.rclb.mgf	136.7	1214.61	3	0	0.0169	1	2	GNVK	VSDGTSDESKTNYGYTVGAGVEAFVTNNITTR	LEYR	MOD:01485 V1;MOD:01485 K10	0	5698	Q2KA52	Q2KA52{143-174}	0	0.0001	0.0002	Q2KA52	57.29						156.185
57265@20170914_03_MJLorite_iTRAQ.cmpd.rclb.mgf	182.93	884.188	4	0	0.009	0	2	QDLR	LAGHEAPLQLGFEDFDSYPLYSAYFGATPGR	CANR	MOD:01485 L1	0	3032	Q2K308	Q2K308{45-75}	0	0.0001	0.0002	Q2K308	57.25						101.817
49267@20170914_03_MJLorite_iTRAQ.cmpd.rclb.mgf	157.08	579.816	4	0	0.0039	0	2	IFKK	EAPWATLDHSLVFVPMSK	KVSG	MOD:01485 E1;MOD:01485 K18	0	474	Q2KC86	Q2KC86{492-509}	0	0.0001	0.0002	Q2KC86	57.21						84.839
61889@20170914_03_MJLorite_iTRAQ.cmpd.rclb.mgf	196.68	1224.15	4	0	0.0028	1	2	GVGR	LVDADMEEESSKLTALQTQQQLAIQSLSIANSSAQNILTLFR	S	MOD:01485 L1;MOD:01485 K12	0	5239	Q2KCE9	Q2KCE9{261-302}	0	0.0001	0.0002	Q2KCE9	57.22						137.537
59719@20170914_03_MJLorite_iTRAQ.cmpd.rclb.mgf	190.18	617.606	4	0	-0.002	0	2	QAER	ALITAETLASLAHMLGADKPR	SLEA	MOD:01485 A1;MOD:01485 K19	0	2928	Q2JYF9	Q2JYF9{485-505}	0	0.0001	0.0002	Q2JYF9	57.18						75.2578
42622@20170914_03_MJLorite_iTRAQ.cmpd.rclb.mgf	137.62	579.328	4	0	0.0002	0	2	AKVR	IALDWTPNTNHIGIYVAK	AKGF	MOD:01485 I1;MOD:01485 K18	0	9495	Q2K3H4	Q2K3H4{34-51}	0	0.0001	0.0002	Q2K3H4	57.16						85.3409
42044@20170914_03_MJLorite_iTRAQ.cmpd.rclb.mgf	135.9	911.205	4	0	0.0091	1	2	GNVK	VSDGTSDESKTNYGYTVGAGVEAFVTNNITTR	LEYR	MOD:01485 V1;MOD:01485 K10	0	5698	Q2KA52	Q2KA52{143-174}	0	0.0001	0.0002	Q2KA52	57.17						144.214
65156@20170914_03_MJLorite_iTRAQ.cmpd.rclb.mgf	236.2	561.319	5	0	-0.0045	1	2	LIAK	MKEAGVSIIYWGGLHTEAGLIIR	QAAD	MOD:01485 M1;MOD:01485 K2	0	3055	Q2K502	Q2K502{211-233}	0	0.0001	0.0002	Q2K502	57.14						57.9174
59404@20170914_03_MJLorite_iTRAQ.cmpd.rclb.mgf	189.23	650.884	4	0	0.0026	0	2	ANPK	LVGVFASNLILAQGVGQAIAENK	LGDK	MOD:01485 L1;MOD:01485 K23	0	8759	Q2KCX3	Q2KCX3{224-246}	0	0.0001	0.0002	Q2KCX3	57.11						91.9075
46727@20170914_03_MJLorite_iTRAQ.cmpd.rclb.mgf	149.65	557.565	4	0	0.0032	0	2	AGYK	IPTTMEELHALTDQIVK	DGGV	MOD:01485 I1;MOD:01485 K17	0	4702	Q2KCC4	Q2KCC4{188-204}	0	0.0001	0.0002	Q2KCC4	57.16						61.0817
53656@20170914_03_MJLorite_iTRAQ.cmpd.rclb.mgf	171.68	831.752	3	1	-0.0183	0	2	DESK	TNYGYTVGAGVEAFVTNNITTR	LEYR	MOD:01485 T1	0	5698	Q2KA52	Q2KA52{153-174}	0	0.0001	0.0002	Q2KA52	57.11						98.3828
38739@20170914_03_MJLorite_iTRAQ.cmpd.rclb.mgf	126.18	479.045	4	0	0.0058	0	2	TKGK	VVIQLLPQVAPEHVAR	IKEL	MOD:01485 V1	0	2976	Q2K8D7	Q2K8D7{20-35}	0	0.0001	0.0002	Q2K8D7	57.13						68.3197
51041@20170914_03_MJLorite_iTRAQ.cmpd.rclb.mgf	162.3	655.023	3	0	-0.0018	0	2	HLAR	DLGPIESYLSIDEVIR	VAKL	MOD:01485 D1	0	52	Q2K340	Q2K340{61-76}	0	0.0001	0.0002	Q2K340	57.13						120.137
34979@20170914_03_MJLorite_iTRAQ.cmpd.rclb.mgf	115.17	748.636	4	1	0.0052	0	2	GTWR	GELSNSASSNNTWVNNIAVADPSLNK	NNTA	MOD:01485 G1;MOD:01485 K26	0	8866	Q2K908	Q2K908{263-288}	0	0.0001	0.0002	Q2K908	57.08						108.346
57963@20170914_03_MJLorite_iTRAQ.cmpd.rclb.mgf	185	607.339	4	0	0.0004	0	2	PLAR	YSTVGGIPLTDLVTMGWVTK	ERLE	MOD:01485 Y1;MOD:01485 K20	0	1302	Q2K3E9	Q2K3E9{186-205}	0	0.0001	0.0002	Q2K3E9	57.07						88.6565
16415@20170914_03_MJLorite_iTRAQ.cmpd.rclb.mgf	60.68	750.88	2	0	0.0025	0	2		AEAAPLYDTYSR	APLR	MOD:01485 A1	0	7757	Q2KCV1	Q2KCV1{2-13}	0	0.0001	0.0002	Q2KCV1	57						136.83
38838@20170914_03_MJLorite_iTRAQ.cmpd.rclb.mgf	126.47	635.089	4	0	0.0017	0	2	GAVR	HPLSTQDFSSFLLQAQSSGAK	VIGL	MOD:01485 H1;MOD:01485 K21	0	8393	Q2K0R6	Q2K0R6{201-221}	0	0.0001	0.0002	Q2K0R6	57.07						74.6291
63764@20170914_03_MJLorite_iTRAQ.cmpd.rclb.mgf	203.12	602.126	4	0	-0.0023	0	2	LIAR	LHQAGAISVVAADILALTLLK	SPGE	MOD:01485 L1;MOD:01485 K21	0	1202	Q2K813	Q2K813{239-259}	0	0.0001	0.0002	Q2K813	56.99						60.6016
37207@20170914_03_MJLorite_iTRAQ.cmpd.rclb.mgf	121.7	408.747	4	0	0.0003	0	2	SDNK	ALSAVSDALGLGAAK	VDTA	MOD:01485 A1;MOD:01485 K15	0	5239	Q2K133;Q2KCE9;Q2KCF0	Q2K133{59-73};Q2KCE9{59-73};Q2KCF0{59-73}	0	0.0001	0.0002	Q2K133;Q2KCE9;Q2KCF0	56.98						71.0713
61740@20170914_03_MJLorite_iTRAQ.cmpd.rclb.mgf	196.25	622.114	4	0	-0.006	0	2	VVEK	AEIGLIGLAVMGSNLALNIAEK	GNKI	MOD:01485 A1;MOD:01485 K22	0	2555	Q2K7E1	Q2K7E1{11-32}	0	0.0001	0.0002	Q2K7E1	57.02						98.1899
41629@20170914_03_MJLorite_iTRAQ.cmpd.rclb.mgf	134.7	558.064	4	0	0.0007	0	2	TNTK	LDTLLASSSLTQASSYVGK	YMES	MOD:01485 L1;MOD:01485 K19	0	4239	Q2KCD6	Q2KCD6{74-92}	0	0.0001	0.0002	Q2KCD6	57.06						83.7455
48798@20170914_03_MJLorite_iTRAQ.cmpd.rclb.mgf	155.68	638.339	4	0	-0.0012	1	2	SISK	RIELQENFVSALSDSIDSGIGR	LVDA	MOD:01485 R1	0	5239	Q2KCF0	Q2KCF0{238-259}	0	0.0001	0.0002	Q2KCF0	56.97						62.6571
46011@20170914_03_MJLorite_iTRAQ.cmpd.rclb.mgf	147.55	603.839	4	0	0.0029	1	2	YATR	DDKFIAMPLTTIGNAVVYR	DSHV	MOD:01485 D1;MOD:01485 K3	0	2207	Q2JZK2	Q2JZK2{142-160}	0	0.0001	0.0002	Q2JZK2	56.87						49.5611
64708@20170914_03_MJLorite_iTRAQ.cmpd.rclb.mgf	207.23	906.215	4	0	-0.0021	0	2	RLIR	DSANVDYYATFDNFQVGVLQANSIVDGLGLK	DGKG	MOD:01485 D1;MOD:01485 K31	0	5613	Q2K5F5	Q2K5F5{120-150}	0	0.0001	0.0002	Q2K5F5	56.89						118.371
57489@20170914_03_MJLorite_iTRAQ.cmpd.rclb.mgf	183.6	731.653	4	0	0.0187	0	2	RHGK	NLIGVFHQPDLVLADTDVLNTLSER	EFRA	MOD:01485 N1	0	1307	Q2K3L3	Q2K3L3{163-187}	0	0.0001	0.0002	Q2K3L3	56.85						80.5792
35833@20170914_03_MJLorite_iTRAQ.cmpd.rclb.mgf	117.68	571.071	4	0	-0.0015	0	2	EIIR	QYGLQLPQAALDHLNSPK	ADAP	MOD:01485 Q1;MOD:01485 K18	0	2860	Q2K997	Q2K997{215-232}	0	0.0001	0.0002	Q2K997	56.93						84.2895
56875@20170914_03_MJLorite_iTRAQ.cmpd.rclb.mgf	181.78	855.256	5	0	0.0146	0	2	VDAK	YSSSENYEQQIVIDTQAGSPPNVAILPQPGLLADLAGK	GFLT	MOD:01485 Y1;MOD:01485 K38	0	4702	Q2KCC4	Q2KCC4{85-122}	0	0.0001	0.0002	Q2KCC4	56.88						95.1348
38648@20170914_03_MJLorite_iTRAQ.cmpd.rclb.mgf	125.92	479.045	4	0	0.0057	0	2	TKGK	VVIQLLPQVAPEHVAR	IKEL	MOD:01485 V1	0	2976	Q2K8D7	Q2K8D7{20-35}	0	0.0001	0.0002	Q2K8D7	56.84						69.5933
16604@20170914_03_MJLorite_iTRAQ.cmpd.rclb.mgf	61.25	451.476	4	0	0.0056	0	2	MISR	ITGGDPMGATQFNHGR	QAEE	MOD:01485 I1	0	2233	Q2K7E8	Q2K7E8{74-89}	0	0.0001	0.0002	Q2K7E8	56.8						50.3346
55147@20170914_03_MJLorite_iTRAQ.cmpd.rclb.mgf	176.07	754.775	3	1	-0.016	0	2	NTGR	IIAGGVAAGVVGGLIGGAIANGGPR	YVDE	MOD:01485 I1	0	8825	Q2K013	Q2K013{36-60}	0	0.0001	0.0002	Q2K013	56.78						104.147
61748@20170914_03_MJLorite_iTRAQ.cmpd.rclb.mgf	196.27	816.44	6	0	0.0148	1	2	GVGR	LVDADMEEESSKLTALQTQQQLAIQSLSIANSSAQNILTLFR	S	MOD:01485 L1;MOD:01485 K12	0	5239	Q2KCE9	Q2KCE9{261-302}	0	0.0001	0.0002	Q2KCE9	56.72						107.927
35784@20170914_03_MJLorite_iTRAQ.cmpd.rclb.mgf	117.53	630.578	4	0	0.0099	0	2	GCGK	STPHAELNANTTWHLVADIER	LRQM	MOD:01485 S1	0	2776	Q2KAB3	Q2KAB3{78-98}	0	0.0001	0.0002	Q2KAB3	56.68						84.5012
54640@20170914_03_MJLorite_iTRAQ.cmpd.rclb.mgf	174.57	775.109	3	1	0.0083	0	2	LTAK	NIPAEAFTLNAYAAVEVLK	AGIE	MOD:01485 N1;MOD:01485 K19	0	5167	Q2K5M7	Q2K5M7{290-308}	0	0.0001	0.0002	Q2K5M7	56.61						108.781
37813@20170914_03_MJLorite_iTRAQ.cmpd.rclb.mgf	123.47	569.592	4	0	0.0003	0	2	EVQK	NIILTGHIVDHLNTVISK	TRWA	MOD:01485 N1;MOD:01485 K18	0	5676	Q2JZM5	Q2JZM5{225-242}	0	0.0001	0.0002	Q2JZM5	56.57						89.3555
42963@20170914_03_MJLorite_iTRAQ.cmpd.rclb.mgf	138.62	775.404	4	0	0.0039	1	2	DYFK	ANNLQYNPVVFEKLDEVNAAYDAGR	CDVY	MOD:01485 A1;MOD:01485 K13	0	6573	Q2K902	Q2K902{173-197}	0	0.0001	0.0002	Q2K902	56.54						79.2249
30826@20170914_03_MJLorite_iTRAQ.cmpd.rclb.mgf	103	553.803	4	0	0.0057	0	2	SMSK	DLGQQIVVENVGGAGGTLGAGR	VANA	MOD:01485 D1	0	8013	Q2K4P7	Q2K4P7{59-80}	0	0.0001	0.0002	Q2K4P7	56.47						88.1936
26558@20170914_03_MJLorite_iTRAQ.cmpd.rclb.mgf	90.47	436.728	4	0	-0.0005	0	2	AQAR	MDNLLSANYTDAK	VDAV	MOD:01485 M1;MOD:01485 K13	0	5613	Q2K5F5	Q2K5F5{216-228}	0	0.0001	0.0002	Q2K5F5	56.49						58.1159
53256@20170914_03_MJLorite_iTRAQ.cmpd.rclb.mgf	170.5	759.64	4	0	0.0137	0	2	KTSK	NHGAAYIASFPIPEVVMGINSFEQGAR	SVDP	MOD:01485 N1;MOD:00719 M17	0	10500	Q2K8G8	Q2K8G8{150-176}	0	0.0001	0.0002	Q2K8G8	56.5						60.2321
32400@20170914_03_MJLorite_iTRAQ.cmpd.rclb.mgf	107.6	706.842	4	0	0.0126	0	2	GYDR	AYIEDYLGSNADSYNHPNAAIEPR	IPGI	MOD:01485 A1	0	10055	Q2K1E9	Q2K1E9{464-487}	0	0.0001	0.0002	Q2K1E9	56.52						104.707
33165@20170914_03_MJLorite_iTRAQ.cmpd.rclb.mgf	109.85	553.557	4	0	0.0049	0	2	PGIK	IVFSPTAPTEYNASLNAK	LDAG	MOD:01485 I1;MOD:01485 K18	0	8161	Q2K670	Q2K670{59-76}	0	0.0001	0.0002	Q2K670	56.51						75.5213
58540@20170914_03_MJLorite_iTRAQ.cmpd.rclb.mgf	186.7	679.885	4	0	0.0002	1	2	IQKK	FLANSPFVIIFQQTEVAGYRK	NLKD	MOD:01485 F1;MOD:01485 K21	0	3376	Q2K350	Q2K350{505-525}	0	0.0001	0.0002	Q2K350	56.42						81.2225
32835@20170914_03_MJLorite_iTRAQ.cmpd.rclb.mgf	108.88	562.811	4	1	0.0148	0	2	RMSK	GTNVQDWNQATNLVITGK	AGGQ	MOD:01485 G1;MOD:01485 K18	0	2233	Q2K7E8	Q2K7E8{239-256}	0	0.0001	0.0002	Q2K7E8	56.3						65.0218
62641@20170914_03_MJLorite_iTRAQ.cmpd.rclb.mgf	198.9	641.116	4	0	-0.0036	0	2	DRRK	AMLEDIAILTAGTVISEDLGIK	LENV	MOD:01485 A1;MOD:01485 K22	0	6161	Q2JYW6;Q2KAU2	Q2JYW6{287-308};Q2KAU2{287-308}	0	0.0001	0.0002	Q2JYW6;Q2KAU2	56.3						91.5308
38559@20170914_03_MJLorite_iTRAQ.cmpd.rclb.mgf	125.65	463.514	4	0	-0.0012	0	2	KDFK	LGPSFDTNFVGPIAK	E	MOD:01485 L1;MOD:01485 K15	0	3376	Q2K350	Q2K350{532-546}	0	0.0001	0.0002	Q2K350	56.28						69.7469
53965@20170914_03_MJLorite_iTRAQ.cmpd.rclb.mgf	172.58	1234.1	4	0	0.0054	0	2	ADGK	GGTDVGSLSIGVHTPPQGQYSFDFEDAPTEYPGLPDIASGYAGFK	FGDK	MOD:01485 G1;MOD:01485 K45	0	6636	Q2K890	Q2K890{104-148}	0	0.0001	0.0002	Q2K890	56.25						157.46
58683@20170914_03_MJLorite_iTRAQ.cmpd.rclb.mgf	187.12	562.845	4	1	-0.0194	0	2	KILR	VLAPLGVLLPNGLGLNVDGK	DIGR	MOD:01485 V1;MOD:01485 K20	0	2314	Q2KBM4	Q2KBM4{181-200}	0	0.0001	0.0002	Q2KBM4	56.25						71.0306
37530@20170914_03_MJLorite_iTRAQ.cmpd.rclb.mgf	122.63	745.9	4	0	-0.0052	1	2	ENLK	ISNTGGAGIYGGNVTNWTVRDVEIAK	TGLS	MOD:01485 I1;MOD:01485 K26	0	1972	Q2K708	Q2K708{100-125}	0	0.0001	0.0002	Q2K708	56.23						81.6203
54718@20170914_03_MJLorite_iTRAQ.cmpd.rclb.mgf	174.8	598.62	4	0	0.0019	0	2	DDLR	ILEITPLTKPADIIAEIPR	TVAV	MOD:01485 I1;MOD:01485 K9	0	6260	Q2K7N7	Q2K7N7{10-28}	0	0.0001	0.0002	Q2K7N7	56.2						79.3042
41152@20170914_03_MJLorite_iTRAQ.cmpd.rclb.mgf	133.3	574.558	4	0	0.0065	0	2	QYLK	SSSQDSAQQTLLSGLEDLK	SIMG	MOD:01485 S1;MOD:01485 K19	0	3383	Q2KCE0	Q2KCE0{70-88}	0	0.0001	0.0002	Q2KCE0	56.15						80.5261
36431@20170914_03_MJLorite_iTRAQ.cmpd.rclb.mgf	119.43	560.308	4	0	0.0042	1	2	ATVR	RFDDDASTIQALVSGQVK	AVGG	MOD:01485 R1;MOD:01485 K18	0	1306	Q2K7W3	Q2K7W3{171-188}	0	0.0001	0.0002	Q2K7W3	56.2						56.7192
51070@20170914_03_MJLorite_iTRAQ.cmpd.rclb.mgf	162.38	638.339	4	0	0.0009	1	2	SISK	RIELQENFVSALSDSIDSGIGR	LVDA	MOD:01485 R1	0	5239	Q2KCF0	Q2KCF0{238-259}	0	0.0001	0.0002	Q2KCF0	56.23						60.7542
29431@20170914_03_MJLorite_iTRAQ.cmpd.rclb.mgf	98.9	751.365	4	0	0.001	0	2	DAAK	AMVDQGVDVLTQHTDTTAPMQVAEER	GIHA	MOD:01485 A1;MOD:00719 M20	0	10500	Q2K8G8	Q2K8G8{204-229}	0	0.0001	0.0002	Q2K8G8	56.14						116.692
24968@20170914_03_MJLorite_iTRAQ.cmpd.rclb.mgf	85.8	441.252	4	0	-0.0016	0	2	SGLR	AVALGMQQIATGDAK	IIVA	MOD:01485 A1;MOD:01485 K15	0	8991	Q2K324	Q2K324{96-110}	0	0.0001	0.0002	Q2K324	56.11						75.6577
57882@20170914_03_MJLorite_iTRAQ.cmpd.rclb.mgf	184.77	725.398	3	0	0.0017	0	2	RVVK	SGNMSLGVNLLSVLAEQAAR	ALDP	MOD:01485 S1	0	4937	Q2KDU1	Q2KDU1{126-145}	0	0.0001	0.0002	Q2KDU1	56.06						123.316
50021@20170914_03_MJLorite_iTRAQ.cmpd.rclb.mgf	159.3	680.625	4	0	0.0233	0	2	SAWR	YDADVPLIVPEVNPDAVTQFTK	RNII	MOD:01485 Y1;MOD:01485 K22	0	4857	Q2K2U3	Q2K2U3{100-121}	0	0.0001	0.0002	Q2K2U3	56.05						81.5752
43786@20170914_03_MJLorite_iTRAQ.cmpd.rclb.mgf	141.03	527.038	4	0	0.0027	0	2	AGPK	AQLTAIVDTWGTYYSK	RVHA	MOD:01485 A1;MOD:01485 K16	0	10500	Q2K8G8	Q2K8G8{247-262}	0	0.0001	0.0002	Q2K8G8	55.99						51.7279
64780@20170914_03_MJLorite_iTRAQ.cmpd.rclb.mgf	208.83	906.469	4	1	0.0141	0	2	RLIR	DSANVDYYATFDNFQVGVLQANSIVDGLGLK	DGKG	MOD:01485 D1;MOD:01485 K31	0	5613	Q2K5F5	Q2K5F5{120-150}	0	0.0001	0.0002	Q2K5F5	55.98						112.528
52804@20170914_03_MJLorite_iTRAQ.cmpd.rclb.mgf	169.18	704.39	4	0	0.0068	1	2	GSVR	GRVGYDMNPFLLYGTAGLALGNVK	VSDG	MOD:01485 G1;MOD:01485 K24	0	5698	Q2KA52	Q2KA52{119-142}	0	0.0001	0.0002	Q2KA52	55.93						71.5874
61012@20170914_03_MJLorite_iTRAQ.cmpd.rclb.mgf	193.98	689.055	3	0	0.0122	0	2	TSDR	LYFEPLTAEDVIEILR	AEQE	MOD:01485 L1	0	1215	Q2K603	Q2K603{676-691}	0	0.0001	0.0002	Q2K603	55.88						87.5381
27741@20170914_03_MJLorite_iTRAQ.cmpd.rclb.mgf	93.93	583.061	4	0	0.0099	0	2	PVPK	AGDQGYISDHPDIGVALNAK	STHA	MOD:01485 A1;MOD:01485 K20	0	8161	Q2K670	Q2K670{290-309}	0	0.0001	0.0002	Q2K670	55.9						88.6736
25927@20170914_03_MJLorite_iTRAQ.cmpd.rclb.mgf	88.62	398.98	4	0	-0.0015	0	2	IDDK	SVESFGPNLVGAK	YTLA	MOD:01485 S1;MOD:01485 K13	0	9188	Q2K5N5	Q2K5N5{105-117}	0	0.0001	0.0002	Q2K5N5	55.84						53.435
44500@20170914_03_MJLorite_iTRAQ.cmpd.rclb.mgf	143.12	911.205	4	0	0.0071	1	2	GNVK	VSDGTSDESKTNYGYTVGAGVEAFVTNNITTR	LEYR	MOD:01485 V1;MOD:01485 K10	0	5698	Q2KA52	Q2KA52{143-174}	0.0001	0.0002	0.0003	Q2KA52	55.78						102.161
58354@20170914_03_MJLorite_iTRAQ.cmpd.rclb.mgf	186.15	679.885	4	0	0.0009	1	2	IQKK	FLANSPFVIIFQQTEVAGYRK	NLKD	MOD:01485 F1;MOD:01485 K21	0	3376	Q2K350	Q2K350{505-525}	0.0001	0.0002	0.0003	Q2K350	55.71						83.3351
25553@20170914_03_MJLorite_iTRAQ.cmpd.rclb.mgf	87.52	560.316	4	0	0.0049	0	2	GQMK	ALQVGHEIAAQQVAQMQK	LRGL	MOD:01485 A1;MOD:01485 K18	0	478	Q2K2Q6	Q2K2Q6{199-216}	0.0001	0.0002	0.0003	Q2K2Q6	55.77						62.5411
42785@20170914_03_MJLorite_iTRAQ.cmpd.rclb.mgf	138.08	775.404	4	0	0.0038	1	2	DYFK	ANNLQYNPVVFEKLDEVNAAYDAGR	CDVY	MOD:01485 A1;MOD:01485 K13	0	6573	Q2K902	Q2K902{173-197}	0.0001	0.0002	0.0003	Q2K902	55.7						110.232
42529@20170914_03_MJLorite_iTRAQ.cmpd.rclb.mgf	137.33	542.543	4	0	0.0049	0	2	EHWK	DIIRPSSLLDSCTIDGK	IYCA	MOD:00110 C12;MOD:01485 D1;MOD:01485 K17	0	2233	Q2K7E8	Q2K7E8{114-130}	0.0001	0.0002	0.0003	Q2K7E8	55.73						46.5211
60390@20170914_03_MJLorite_iTRAQ.cmpd.rclb.mgf	192.15	798.896	4	0	-0.0054	0	2	TVPK	ELGGDGATGTNPEQLFAAGYSACFLGALK	FVAG	MOD:00110 C23;MOD:01485 E1;MOD:01485 K29	0	7869	Q2KB07	Q2KB07{35-63}	0.0001	0.0002	0.0003	Q2KB07	55.66						103.305
48215@20170914_03_MJLorite_iTRAQ.cmpd.rclb.mgf	153.98	839.924	4	0	-0.0052	1	2	PQYK	FVMEGAADIAQETGLATGKYDIATGGYYR	APAR	MOD:01485 F1;MOD:01485 K19	0	6989	Q2K0L8	Q2K0L8{75-103}	0.0001	0.0002	0.0003	Q2K0L8	55.67						144.087
46766@20170914_03_MJLorite_iTRAQ.cmpd.rclb.mgf	149.75	671.943	5	0	0.0077	1	2	QKLR	GLVSQQMTMMGTWLQTEQTDKDLAQAR	REKF	MOD:01485 G1;MOD:01485 K21	0	478	Q2K2Q6	Q2K2Q6{219-245}	0.0001	0.0002	0.0003	Q2K2Q6	55.66						74.4136
40216@20170914_03_MJLorite_iTRAQ.cmpd.rclb.mgf	130.55	470.256	4	0	0.003	0	2	PYAK	IVAESFGETFTNFK	TPVV	MOD:01485 I1;MOD:01485 K14	0	7138	Q2KCV8	Q2KCV8{41-54}	0.0001	0.0002	0.0003	Q2KCV8	55.62						49.1094
42448@20170914_03_MJLorite_iTRAQ.cmpd.rclb.mgf	137.1	638.832	4	1	-0.017	0	2	SINR	SFSAPINLHFDQSPADLAHLAR	HETD	MOD:01485 S1	0	3195	Q2KAN3	Q2KAN3{544-565}	0.0001	0.0002	0.0003	Q2KAN3	55.67						79.6474
36162@20170914_03_MJLorite_iTRAQ.cmpd.rclb.mgf	118.65	560.308	4	0	0.0039	1	2	ATVR	RFDDDASTIQALVSGQVK	AVGG	MOD:01485 R1;MOD:01485 K18	0	1306	Q2K7W3	Q2K7W3{171-188}	0.0001	0.0002	0.0003	Q2K7W3	55.64						60.7144
50234@20170914_03_MJLorite_iTRAQ.cmpd.rclb.mgf	159.93	629.832	4	1	0.0104	0	2	MYNK	LMPWDHLAGTLISQEAGAYAAR	FDGS	MOD:01485 L1	0	5084	Q2K7U8	Q2K7U8{219-240}	0.0001	0.0002	0.0003	Q2K7U8	55.59						101.754
54956@20170914_03_MJLorite_iTRAQ.cmpd.rclb.mgf	175.52	561.511	5	0	0.0085	0	2	NLRR	SIALSVEDGVVATYIHNAVSDGLGK	LGVL	MOD:01485 S1;MOD:01485 K25	0	6902	Q2K8Y6	Q2K8Y6{142-166}	0.0001	0.0002	0.0003	Q2K8Y6	55.58						88.6619
52800@20170914_03_MJLorite_iTRAQ.cmpd.rclb.mgf	169.17	638.342	4	0	0.0105	1	2	SISK	RIELQENFVSALSDSIDSGIGR	LVDA	MOD:01485 R1	0	5239	Q2KCF0	Q2KCF0{238-259}	0.0001	0.0002	0.0003	Q2KCF0	55.61						65.5372
5606@20170914_03_MJLorite_iTRAQ.cmpd.rclb.mgf	28.97	427.239	4	0	0.0015	0	2	ILVK	GNHLDQTHAISPK	GVIA	MOD:01485 G1;MOD:01485 K13	0	1972	Q2K708	Q2K708{196-208}	0.0001	0.0002	0.0003	Q2K708	55.59						70.5565
32807@20170914_03_MJLorite_iTRAQ.cmpd.rclb.mgf	108.8	562.558	4	0	0.0023	0	2	RMSK	GTNVQDWNQATNLVITGK	AGGQ	MOD:01485 G1;MOD:01485 K18	0	2233	Q2K7E8	Q2K7E8{239-256}	0.0001	0.0002	0.0003	Q2K7E8	55.53						65.7623
32535@20170914_03_MJLorite_iTRAQ.cmpd.rclb.mgf	108	567.02	4	1	0.014	0	2	YYSR	HDYEGLDTGAANDLMDNLR	SQLS	MOD:01485 H1	0	10120	Q2K484	Q2K484{415-433}	0.0001	0.0002	0.0003	Q2K484	55.61						65.6857
26196@20170914_03_MJLorite_iTRAQ.cmpd.rclb.mgf	89.4	870.44	3	0	-0.0241	0	2	FLTK	QVDANNGAVTDVQGTYGTFHVK	ADGS	MOD:01485 Q1;MOD:01485 K22	0	201	Q2K1Q3	Q2K1Q3{162-183}	0.0001	0.0002	0.0003	Q2K1Q3	55.48						103.566
52401@20170914_03_MJLorite_iTRAQ.cmpd.rclb.mgf	167.27	736.15	4	0	-0.0023	0	2	DVLK	DVPTAVEAGLPGFEVGIWHGIYTPK	GTPA	MOD:01485 D1;MOD:01485 K25	0	8013	Q2K4P7	Q2K4P7{235-259}	0.0001	0.0002	0.0003	Q2K4P7	55.47						111.407
41922@20170914_03_MJLorite_iTRAQ.cmpd.rclb.mgf	135.55	853.08	3	1	-0.0146	0	2	IKDR	QDRPMLYGPTNEEMVTDIFR	SSVK	MOD:01485 Q1	0	3289	Q2K9R4	Q2K9R4{100-119}	0.0001	0.0002	0.0003	Q2K9R4	55.36						109.787
43159@20170914_03_MJLorite_iTRAQ.cmpd.rclb.mgf	139.2	564.789	4	0	0.0054	0	2	WLNK	QYSVWGQVIEGMDNVDK	IKRG	MOD:01485 Q1;MOD:01485 K17	0	2976	Q2K8D7	Q2K8D7{131-147}	0.0001	0.0002	0.0003	Q2K8D7	55.44						64.8714
61688@20170914_03_MJLorite_iTRAQ.cmpd.rclb.mgf	196.1	782.8	5	0	-0.0094	0	2	VDGK	LFTIEGVDVATNFDPAYEGVDALVTFEGYIGGNK	VSEM	MOD:01485 L1;MOD:01485 K34	0	6636	Q2K890	Q2K890{185-218}	0.0001	0.0002	0.0003	Q2K890	55.36						96.467
30970@20170914_03_MJLorite_iTRAQ.cmpd.rclb.mgf	103.42	506.272	4	0	0.0076	0	2	ENLK	FVFESAQGNPATAAQIAR	QFAG	MOD:01485 F1	0	5726	Q2K3B2	Q2K3B2{60-77}	0.0001	0.0002	0.0003	Q2K3B2	55.41						59.6287
44357@20170914_03_MJLorite_iTRAQ.cmpd.rclb.mgf	142.7	513.776	4	1	0.0095	0	2	GPCK	MIAPSLEEISVEMEGK	VKVA	MOD:01485 M1;MOD:01485 K16	0	5601	Q2KE78	Q2KE78{36-51}	0.0001	0.0002	0.0003	Q2KE78	55.41						74.064
46888@20170914_03_MJLorite_iTRAQ.cmpd.rclb.mgf	150.1	753.388	3	0	-0.0064	0	2	GAAK	VDTAYSAMDSAIDVVGDIK	AKLV	MOD:01485 V1;MOD:01485 K19	0	5239	Q2KCF0	Q2KCF0{74-92}	0.0001	0.0002	0.0003	Q2KCF0	55.29						121.331
61677@20170914_03_MJLorite_iTRAQ.cmpd.rclb.mgf	196.05	1064.12	5	0	0.0494	0	2	FSPR	DLGAHAAADDLFTPVHPAAFNAVSPPIFQTSLFTYDSYEAMEDVFAGR	TRNF	MOD:01485 D1	0	7001	Q2JYI5	Q2JYI5{9-56}	0.0001	0.0002	0.0003	Q2JYI5	55.26						136.03
44452@20170914_03_MJLorite_iTRAQ.cmpd.rclb.mgf	142.98	635.861	4	0	0.0021	1	2	TEER	RQVIDFTIPYAATPAAFATAK	DSPL	MOD:01485 R1;MOD:01485 K21	0	1971	Q2K072	Q2K072{101-121}	0.0001	0.0002	0.0003	Q2K072	55.18						63.0079
49659@20170914_03_MJLorite_iTRAQ.cmpd.rclb.mgf	158.23	583.834	4	0	0.006	0	2	DAGK	LGQITVVGFDDDPITLGGVK	EGTV	MOD:01485 L1;MOD:01485 K20	0	3891	Q2JZ78	Q2JZ78{236-255}	0.0001	0.0002	0.0003	Q2JZ78	55.14						71.6874
53372@20170914_03_MJLorite_iTRAQ.cmpd.rclb.mgf	170.85	702.141	4	0	0.0045	0	2	KTFR	SGAQATFIVFQTPEEGIGIPVDLK	GFAE	MOD:01485 S1;MOD:01485 K24	0	2314	Q2KBM4	Q2KBM4{231-254}	0.0001	0.0002	0.0003	Q2KBM4	55.13						77.3657
40756@20170914_03_MJLorite_iTRAQ.cmpd.rclb.mgf	132.13	494.54	4	0	0.0057	1	2	VLAK	KATLAEDLLSLYHGR	WQGS	MOD:01485 K1;MOD:01485 K1	0	2539	Q2KC22	Q2KC22{429-443}	0.0001	0.0002	0.0003	Q2KC22	55.11						41.0803
60258@20170914_03_MJLorite_iTRAQ.cmpd.rclb.mgf	191.75	1145.63	3	1	-0.0166	1	2	ESSK	LSALQTQQQLAVQSLSIANSSSQTILSLFRG		MOD:01485 L1	0	5239	Q2KCF0	Q2KCF0{272-302}	0.0001	0.0002	0.0003	Q2KCF0	55.15						125.299
31852@20201019_1_3409_iTRAQ.cmpd.rclb.mgf	102.55	610.057	4	0	0.0031	0	2	LLGR	IPSAVGYQPTLATDMGQMQER	ITTT	MOD:01485 I1	0	8381	Q2K3H0	Q2K3H0{274-294}	0.0001	0.0002	0.0003	Q2K3H0		67.16						58.4467
32228@20201019_1_3409_iTRAQ.cmpd.rclb.mgf	103.65	805.41	3	0	-0.0021	0	2	VFIK	GSSSDPNADFLFSGQQEVLK	AAID	MOD:01485 G1;MOD:01485 K20	0	10540	Q2K5E8	Q2K5E8{153-172}	0.0001	0.0002	0.0003	Q2K5E8		96.83						119.823
5156@20201019_1_3409_iTRAQ.cmpd.rclb.mgf	23.5	515.005	4	0	-0.0002	0	2	TPAR	HYAHVDCPGHADYVK	NMIT	MOD:01214 C7;MOD:01485 H1;MOD:01485 K15	0	9836	Q2K9N2	Q2K9N2{71-85}	0.0001	0.0002	0.0003	Q2K9L8;Q2K9N2		41.55						93.2989
25344@20201019_1_3409_iTRAQ.cmpd.rclb.mgf	83.22	620.817	4	0	0.0114	0	2	VAGK	GHEEGQTIGGVTLPFSDHAEVR	KALE	MOD:01485 G1	0	3475	Q2K6B6	Q2K6B6{477-498}	0.0001	0.0002	0.0003	Q2K6B6		44.46						60.2875
51183@20201019_1_3409_iTRAQ.cmpd.rclb.mgf	163.65	786.158	4	0	-0.0041	0	2	ILAK	GVDDIAVLAVNDWHVMGAWAQSSGGLGK	IHFL	MOD:01485 G1;MOD:01485 K28	0	1415	Q2KBK7	Q2KBK7{68-95}	0.0001	0.0002	0.0003	Q2KBK7		40.58						126.091
33370@20201019_1_3409_iTRAQ.cmpd.rclb.mgf	106.98	815.953	2	0	0.0017	0	2	PAKR	QAVTNPTNTLFAVK	RLIG	MOD:00040 Q1;MOD:01485 K14	0	7691	Q2KDW6	Q2KDW6{57-70}	0.0001	0.0002	0.0003	Q2KDW6		49.21		25.6966				75.4356
22401@20201019_1_3409_iTRAQ.cmpd.rclb.mgf	74.5	640.684	3	0	0.0066	0	2		TSINTNSSAQAALQTLR	NVNQ	MOD:01485 T1	0	5239	Q2KCF1	Q2KCF1{2-18}	0.0001	0.0002	0.0003	Q2KCF1		91.35						100.887
50357@20201019_1_3409_iTRAQ.cmpd.rclb.mgf	160.67	739.397	4	0	0.0003	0	2	GDQK	AYLQEGMTCILSIHEGVPLALELPR	HVTL	MOD:01214 C9;MOD:01485 Y2	0	7960	Q2K302	Q2K302{105-129}	0.0001	0.0002	0.0003	Q2K302		27.05						79.5628
4446@20201019_1_3409_iTRAQ.cmpd.rclb.mgf	21.43	365.201	4	0	0.0028	0	2		ASTNFRPLHDR	VVVR	MOD:01485 A1	0	2834	Q2KBZ6	Q2KBZ6{2-12}	0.0001	0.0002	0.0003	Q2KBZ6		25.73						68.4368
38532@20201019_1_3409_iTRAQ.cmpd.rclb.mgf	122.57	775.399	4	0	-0.0137	1	2	DYFK	ANNLQYNPVVFEKLDEVNAAYDAGR	CDVY	MOD:01485 Y6;MOD:01485 K13	0	6573	Q2K902	Q2K902{173-197}	0.0001	0.0002	0.0003	Q2K902		41.71		31.975				65.9695
54457@20201019_1_3409_iTRAQ.cmpd.rclb.mgf	173.6	801.193	4	0	0.0062	0	2	IIGR	GIFVTPSDSLAILAANANLAPGYSGGLAGIAR	SMPT	MOD:01485 G1	0	10120	Q2K484	Q2K484{289-320}	0.0001	0.0002	0.0003	Q2K484		61.85						105.753
44797@20201019_1_3409_iTRAQ.cmpd.rclb.mgf	142.57	694.875	4	0	0.009	0	2	AAAR	GETALGIVFMHDAVAQTAEGFPVK	SVAP	MOD:01485 G1;MOD:01485 K24	0	638	Q2K8C6	Q2K8C6{217-240}	0.0001	0.0002	0.0003	Q2K8C6		40.58						95.0202
13445@20201019_1_3409_iTRAQ.cmpd.rclb.mgf	48.05	583.317	4	0	0.0065	0	2	DVAK	TTDQPLVASHSNAHALTPVAR	NLTD	MOD:01485 T1	0	6923	Q2K351	Q2K351{216-236}	0.0001	0.0002	0.0003	Q2K351		107.13						121.358
31754@20201019_1_3409_iTRAQ.cmpd.rclb.mgf	102.27	465.267	4	0	0.0038	0	2	FQAR	HGLPSDGVLGEFTLK	AMNI	MOD:01485 H1;MOD:01485 K15	0	6383	Q2KA26	Q2KA26{153-167}	0.0001	0.0002	0.0003	Q2KA26		50.19						44.2365
52536@20201019_1_3409_iTRAQ.cmpd.rclb.mgf	167.77	659.114	4	0	-0.0045	0	2	VKEK	VQYLAGFYFTPDAMAVTPILK	QGNV	MOD:01485 V1;MOD:01485 K21	0	2946	Q2K4N4	Q2K4N4{90-110}	0.0001	0.0002	0.0003	Q2K4N4		35.14						75.5126
27484@20201019_1_3409_iTRAQ.cmpd.rclb.mgf	89.5	696.391	3	0	-0.0108	0	2	SRVR	ALVGSSNDALSPVIEQAK	KANA	MOD:01485 A1;MOD:01485 K18	0	952	Q2K588	Q2K588{68-85}	0.0001	0.0002	0.0003	Q2K588		60.96						115.201
59430@20201019_1_3409_iTRAQ.cmpd.rclb.mgf	192.33	854.736	4	0	0.0135	0	2	ESSK	LTALQTQQQLAIQSLSIANSSAQNILTLFR	S	MOD:01485 L1	0	5239	Q2KCE9	Q2KCE9{273-302}	0.0001	0.0002	0.0003	Q2KCE9		78.64						106.996
41365@20201019_1_3409_iTRAQ.cmpd.rclb.mgf	130.92	569.313	4	0	-0.0008	0	2	RTGK	LFAHEWSGITPDIMAVAK	GIGG	MOD:01485 L1;MOD:01485 K18	0	7757	Q2KCV1	Q2KCV1{228-245}	0.0001	0.0002	0.0003	Q2KCV1		45.23						59.5639
50427@20201019_1_3409_iTRAQ.cmpd.rclb.mgf	161.27	787.906	4	0	-0.0014	0	2	SAMK	NAATVAAALDEFQSHYPIDFVTFHLAR	TIVD	MOD:01485 N1	0	3789	Q2K2Q3	Q2K2Q3{34-60}	0.0001	0.0002	0.0003	Q2K2Q3		75.07						105.654
32804@20201019_1_3409_iTRAQ.cmpd.rclb.mgf	105.33	477.018	4	0	0.0032	0	2	IGVK	VEIVTHEWAEYLK	LSSD	MOD:01485 V1;MOD:01485 K13	0	474	Q2KC86	Q2KC86{402-414}	0.0001	0.0002	0.0003	Q2KC86		56.46						61.386
26769@20201019_1_3409_iTRAQ.cmpd.rclb.mgf	87.4	816.739	3	0	0.0051	0	2	FLTK	QVDANNGAVTDVQGTYGTFHVK	ADGS	MOD:00040 Q1;MOD:01485 K22	0	201	Q2K1Q3	Q2K1Q3{162-183}	0.0001	0.0002	0.0003	Q2K1Q3		76.36						108.62
28478@20201019_1_3409_iTRAQ.cmpd.rclb.mgf	92.47	675.114	4	0	-0.0036	0	2	ATLK	AANVDYSPCAITQRPSTIAFVK	LVNG	MOD:01214 C9;MOD:01485 A1;MOD:01485 K22	0	5787	Q2KCZ0	Q2KCZ0{67-88}	0.0001	0.0002	0.0003	Q2KCZ0		33.75						82.697
30249@20201019_1_3409_iTRAQ.cmpd.rclb.mgf	97.85	784.151	4	0	0.0061	1	2	EEAK	ANFDAPIYNAPAVAAEEETEAAAPEKR	ERPR	MOD:01485 A1;MOD:01485 K26	0	4476	Q2KBZ0	Q2KBZ0{293-319}	0.0001	0.0002	0.0003	Q2KBZ0		73.92						75.049
39852@20201019_1_3409_iTRAQ.cmpd.rclb.mgf	126.45	747.93	4	0	-0.0004	2	2	DPTK	VKFTPLSAANRFPALQSGEIDVLAR	NTTW	MOD:01485 V1;MOD:01485 K2	0	6573	Q2K902	Q2K902{85-109}	0.0001	0.0002	0.0003	Q2K902		29.47						65.1594
22756@20201019_1_3409_iTRAQ.cmpd.rclb.mgf	75.53	640.684	3	0	0.0067	0	2		TSINTNSSAQAALQTLR	NVNQ	MOD:01485 T1	0	5239	Q2KCF1	Q2KCF1{2-18}	0.0001	0.0002	0.0003	Q2KCF1		77.27						100.018
22356@20201019_1_3409_iTRAQ.cmpd.rclb.mgf	74.37	578.818	4	0	0.0053	0	2	AETK	ASATTEAAADPAVVAVHDSLK	IFTD	MOD:01485 A1;MOD:01485 K21	0	1972	Q2K708	Q2K708{371-391}	0.0001	0.0002	0.0003	Q2K708		24.58						67.2314
41996@20201019_1_3409_iTRAQ.cmpd.rclb.mgf	132.77	693.847	2	0	0.0054	0	2	LGLK	QTLENPWAAFAR	SHPA	MOD:00040 Q1	0	4462	Q2KE13	Q2KE13{354-365}	0.0001	0.0002	0.0003	Q2KE13		24.59		22.8333				68.1005
26925@20201019_1_3409_iTRAQ.cmpd.rclb.mgf	87.87	566.317	4	0	0.0027	0	2	ATGR	KPYTAGLGLEEAGVALDNR	GRVE	MOD:01485 K1;MOD:01485 K1	0	5902	Q2K3F8	Q2K3F8{276-294}	0.0001	0.0002	0.0003	Q2K3F8		49.21						74.28
47088@20201019_1_3409_iTRAQ.cmpd.rclb.mgf	149.77	668.139	4	0	-0.007	1	2	QVTR	EVDGGLQTIEIKLPAVITTDLR	LNEP	MOD:01485 E1;MOD:01485 K12	0	4099	Q2JYP1	Q2JYP1{158-179}	0.0001	0.0002	0.0003	Q2JYP1;Q2K3P6		33.43		33.0096				93.0649
38245@20201019_1_3409_iTRAQ.cmpd.rclb.mgf	121.75	462.525	4	0	0.0051	0	2	AINK	QAVIDAVFQGAAAVAK	NPIP	MOD:01485 Q1;MOD:01485 K16	0	474	Q2KC86	Q2KC86{316-331}	0.0001	0.0002	0.0003	Q2KC86		81.52						82.6122
37992@20201019_1_3409_iTRAQ.cmpd.rclb.mgf	120.98	730.857	4	0	0.009	0	2	DYVK	NMITGAAQMDGAILVCSAADGPMPQTR	EHIL	MOD:01214 C16;MOD:01485 N1	0	9836	Q2K9N2	Q2K9N2{86-112}	0.0001	0.0002	0.0003	Q2K9L8;Q2K9N2		59.97						65.1507
49067@20201019_1_3409_iTRAQ.cmpd.rclb.mgf	155.58	747.891	4	0	0.0013	0	2	HGKR	NAALIGAGIGALAGGAIGNYMDQQEAELR	AQLE	MOD:01485 N1	0	998	Q2K6F8	Q2K6F8{60-88}	0.0001	0.0002	0.0003	Q2K6F8		140.98						115.138
46019@20201019_1_3409_iTRAQ.cmpd.rclb.mgf	146.28	744.368	4	0	0.0009	0	2	SMAR	SQNPNSANSQFFICFTDAPWLNK	QYSV	MOD:01214 C14;MOD:01485 S1;MOD:01485 K23	0	2976	Q2K8D7	Q2K8D7{108-130}	0.0001	0.0002	0.0003	Q2K8D7		71.3						88.8415
5400@20201019_1_3409_iTRAQ.cmpd.rclb.mgf	24.2	574.313	2	0	0.0101	0	2		SNSSVVIASAGR	TAVG		0	8991	Q2K324	Q2K324{2-13}	0.0001	0.0002	0.0003	Q2K324		28.3						100.752
25365@20201019_1_3409_iTRAQ.cmpd.rclb.mgf	83.28	546.288	4	0	0.0091	0	2	QVAK	ATGAEPGGELYVESLSDAK	GPAP	MOD:01485 A1;MOD:01485 K19	0	10479	Q2KBK4	Q2KBK4{256-274}	0.0001	0.0002	0.0003	Q2KBK4		47.37						51.5635
29452@20201019_1_3409_iTRAQ.cmpd.rclb.mgf	95.52	601.624	3	1	-0.0131	0	2	RVEK	ASDNAAYWSIATTMR	SDNK	MOD:01485 A1	0	5239	Q2KCE9;Q2KCF1	Q2KCE9{40-54};Q2KCF1{40-54}	0.0001	0.0002	0.0003	Q2KCE9;Q2KCF1		24.93						75.2101
13312@20201019_1_3409_iTRAQ.cmpd.rclb.mgf	47.67	467.505	4	0	0.0126	0	2	SMGR	AAVPSGASTGAHEAVELR	DGGK	MOD:01485 A1	0	10555	Q2K8W9	Q2K8W9{35-52}	0.0001	0.0002	0.0003	Q2K8W9		62.49						65.7722
37137@20201019_1_3409_iTRAQ.cmpd.rclb.mgf	118.5	558.547	4	0	0.0136	0	2	PIAR	LTPDQAMYHFLSGYTAK	VAGT	MOD:01485 L1;MOD:01485 K17	0	7556	Q2KE66	Q2KE66{362-378}	0.0001	0.0002	0.0003	Q2KE66		43.77						60.598
50380@20201019_1_3409_iTRAQ.cmpd.rclb.mgf	160.78	912.192	4	1	0.0038	0	2	PKGK	LQHVTMDVAVVDEDMFADGVMFDGSSIGGWK	AINE	MOD:01485 L1;MOD:01485 K31	0	4729	Q2K8F0	Q2K8F0{30-60}	0.0001	0.0002	0.0003	Q2K8F0		30.94						86.0117
32324@20201019_1_3409_iTRAQ.cmpd.rclb.mgf	103.93	457.257	4	0	0.0005	0	2	IEAK	IADGSFSPFTGPITK	ADGS	MOD:01485 I1;MOD:01485 K15	0	3307	Q2K1D3	Q2K1D3{318-332}	0.0001	0.0002	0.0003	Q2K1D3		46.93						52.9276
31624@20201019_1_3409_iTRAQ.cmpd.rclb.mgf	101.88	688.103	4	0	0.0093	0	2	ITVR	TASFASAAEGGSASVEAIPAVSDPGLSR	FVSD	MOD:01485 T1	0	2103	Q2JYP2	Q2JYP2{149-176}	0.0001	0.0002	0.0003	Q2JYP2		38.53						57.9148
56605@20201019_1_3409_iTRAQ.cmpd.rclb.mgf	181.3	726.154	4	0	0.0011	1	2	QRYK	ALQDIIAILGMDELSEEDKLAVAR	ARKI	MOD:01485 A1;MOD:01485 K19	0	8381	Q2K3H0	Q2K3H0{382-405}	0.0001	0.0002	0.0003	Q2K3H0		51.8						85.2918
42444@20201019_1_3409_iTRAQ.cmpd.rclb.mgf	135.48	777.392	4	0	0.0024	1	2	WVGK	SAGIFFAAYGPPISDREEGASTIYTWR	GGYK	MOD:01485 S1	0	5741	Q2KBF1	Q2KBF1{36-62}	0.0001	0.0002	0.0003	Q2KBF1		41.68						86.8386
9608@20201019_1_3409_iTRAQ.cmpd.rclb.mgf	36.8	444.986	4	0	-0.0001	0	2	SLVR	ASLEGSHAEGANFAK	VEAY	MOD:01485 A1;MOD:01485 K15	0	3859	Q2KAU5	Q2KAU5{86-100}	0.0001	0.0002	0.0003	Q2KAU5		26.39						46.9941
51503@20201019_1_3409_iTRAQ.cmpd.rclb.mgf	164.6	726.143	4	0	-0.0011	0	2	NRKK	TSAFAGLLGQIVAAPGVTVVDDGTIDNR	RGSI	MOD:01485 T1	0	3786	Q2KBM5	Q2KBM5{267-294}	0.0001	0.0002	0.0003	Q2KBM5		38.19						66.9207
25279@20201019_1_3409_iTRAQ.cmpd.rclb.mgf	83.03	539.306	4	0	0.0005	0	2	NTAR	VAALASGQVHFVNNVDPK	TVPM	MOD:01485 V1;MOD:01485 K18	0	7567	Q2K1I1	Q2K1I1{248-265}	0.0001	0.0002	0.0003	Q2K1I1		39.62						53.374
45924@20201019_1_3409_iTRAQ.cmpd.rclb.mgf	146	720.77	3	0	0.0144	0	2	KGVK	VLVIASIDGTTLSDVLQK	AHDA	MOD:01485 V1;MOD:01485 K18	0	5613	Q2K5F5	Q2K5F5{86-103}	0.0001	0.0002	0.0003	Q2K5F5		24.49						69.2162
40585@20201019_1_3409_iTRAQ.cmpd.rclb.mgf	128.62	512.093	5	0	0.0058	0	2	VVPK	TGVVAGVYVQAISAFAPHPNAAK	LWME	MOD:01485 T1;MOD:01485 K23	0	2394	Q2K678	Q2K678{266-288}	0.0001	0.0002	0.0003	Q2K678		35.17						64.2684
25093@20201019_1_3409_iTRAQ.cmpd.rclb.mgf	82.48	487.015	4	0	0.0029	0	2	CSGR	NISPELAWSGAPEGTK	SFAV	MOD:01485 N1;MOD:01485 K16	0	8596	Q2KDH1	Q2KDH1{51-66}	0.0001	0.0002	0.0003	Q2KDH1		32.08						41.7356
44821@20201019_1_3409_iTRAQ.cmpd.rclb.mgf	142.63	639.343	6	0	-0.0124	0	2	DGVK	FVIGHFNSGVSIPASEVYAENGILEITPAATNPK	FTER	MOD:01485 F1;MOD:01485 K34	0	3055	Q2K502	Q2K502{94-127}	0.0001	0.0002	0.0003	Q2K502		29.08		29.7761				52.2244
37441@20201019_1_3409_iTRAQ.cmpd.rclb.mgf	119.38	634.817	4	0	0.0041	0	2	RAAK	ADIQVFQNMTGTTGAAWNDPVR	GGEL	MOD:01485 A1	0	2076	Q2KDS5	Q2KDS5{173-194}	0.0001	0.0002	0.0003	Q2KDS5		56.09						77.6639
42758@20201019_1_3409_iTRAQ.cmpd.rclb.mgf	136.42	597.832	4	0	0.0041	0	2	VRAR	GLPIVLISHNMPHVFEVADR	IHIH	MOD:01485 G1	0	1007	Q2KCZ8	Q2KCZ8{201-220}	0.0001	0.0002	0.0003	Q2KCZ8		52.66						79.0848
48741@20201019_1_3409_iTRAQ.cmpd.rclb.mgf	154.62	687.374	4	0	-0.0006	0	2	RGLK	NANTPVWTTLLLGYGSSPLGPDGK	LRTT	MOD:01485 N1;MOD:01485 K24	0	376	Q2JZJ7	Q2JZJ7{211-234}	0.0001	0.0002	0.0003	Q2JZJ7		57.73						62.6374
58343@20201019_1_3409_iTRAQ.cmpd.rclb.mgf	188.7	629.346	4	0	0.0026	0	2	TVDK	AYAPSFVLNCLTATVASVVDK	KLVL	MOD:01214 C10;MOD:01485 Y2;MOD:01485 K21	0	3376	Q2K350	Q2K350{167-187}	0.0001	0.0002	0.0003	Q2K350		41						78.7557
22154@20201019_1_3409_iTRAQ.cmpd.rclb.mgf	73.78	590.986	3	1	0.0173	0	2	DSQR	GLEIVGEYTSGNDK	MHMC	MOD:01485 G1;MOD:01485 K14	0	7819	Q2KCC1	Q2KCC1{286-299}	0.0001	0.0002	0.0003	Q2KCC1		29.47						77.4627
27907@20201019_1_3409_iTRAQ.cmpd.rclb.mgf	90.73	751.366	4	0	0.0044	0	2	DAAK	AMVDQGVDVLTQHTDTTAPMQVAEER	GIHA	MOD:01485 A1;MOD:00719 M20	0	10500	Q2K8G8	Q2K8G8{204-229}	0.0001	0.0002	0.0003	Q2K8G8		65.82						121.35
60278@20201019_1_3409_iTRAQ.cmpd.rclb.mgf	195.55	712.153	4	0	-0.0033	0	2	KVVR	TALQDAASVASLLITTEAMIAELPK	KDAP	MOD:01485 T1;MOD:01485 K25	0	6161	Q2KBZ7	Q2KBZ7{502-526}	0.0001	0.0002	0.0003	Q2KBZ7		32.24						85.9859
17906@20201019_1_3409_iTRAQ.cmpd.rclb.mgf	61.27	712.34	4	0	-0.0005	0	2	TGFK	LDSTELPSNDDTDYETGNLGHRPR	VKGG	MOD:01485 L1	0	4729	Q2K8F0	Q2K8F0{153-176}	0.0001	0.0002	0.0003	Q2K8F0		35.62						49.3535
57801@20201019_1_3409_iTRAQ.cmpd.rclb.mgf	186.15	703.143	4	0	0.0027	0	2	AASR	LDVVQAEGLVQSTLAEIPGLETNIR	VSAH	MOD:01485 L1	0	7622	Q2K4R6	Q2K4R6{212-236}	0.0001	0.0002	0.0003	Q2K4R6		38.39						100.749
11046@20201019_1_3409_iTRAQ.cmpd.rclb.mgf	41.02	448.748	4	0	-0.0007	1	2	EFLR	EGAAIEDFKRPDR	IVVG	MOD:01485 E1;MOD:01485 K9	0	559	Q2K584	Q2K584{151-163}	0.0001	0.0002	0.0003	Q2K584		24.62						62.6547
1420@20201019_1_3409_iTRAQ.cmpd.rclb.mgf	12.48	441.981	4	0	0.0027	1	2	NTFR	TCGRDDQQGAIAGK	YLAD	MOD:01214 C2;MOD:01485 T1;MOD:01485 K14	0	3055	Q2K502	Q2K502{139-152}	0.0001	0.0002	0.0003	Q2K502		33.08						54.5201
40000@20201019_1_3409_iTRAQ.cmpd.rclb.mgf	126.88	728.874	4	0	0.0169	0	2	NIVR	HEVEVHCPADAIPEFFNIDLSGK	KIGD	MOD:01214 C7;MOD:01485 H1;MOD:01485 K23	0	7015	Q2K5U4	Q2K5U4{132-154}	0.0001	0.0002	0.0003	Q2K5U4		41.68						73.6652
34431@20201019_1_3409_iTRAQ.cmpd.rclb.mgf	110.1	591.085	4	0	-0.0122	0	2	SRAK	AMNLVHQVVEPDQLIPAAK	QMIK	MOD:01485 A1;MOD:01485 K19	0	9819	Q2KCQ9	Q2KCQ9{193-211}	0.0001	0.0002	0.0003	Q2KCQ9		43.18		30.2987				59.5941
30135@20201019_1_3409_iTRAQ.cmpd.rclb.mgf	97.52	492.51	4	0	0.002	1	2	TVWR	NRDSSLAEVPGFVEFR	LLRG	MOD:01485 N1	0	2130	Q2K560	Q2K560{24-39}	0.0001	0.0002	0.0003	Q2K560		43.75						56.3768
9303@20201019_1_3409_iTRAQ.cmpd.rclb.mgf	35.9	427.983	4	1	-0.0122	0	2	FAAR	QFVNHGHVTVNGVR	VNIG	MOD:01485 Q1	0	3170	Q2K7U4	Q2K7U4{114-127}	0.0001	0.0002	0.0003	Q2K7U4		25.34						46.5675
37917@20201019_1_3409_iTRAQ.cmpd.rclb.mgf	120.78	508.019	4	0	0.0106	0	2	AMLK	NLTFSLDMENQIMGK	ILDD	MOD:01485 N1;MOD:01485 K15	0	9188	Q2K5N5	Q2K5N5{255-269}	0.0001	0.0002	0.0003	Q2K5N5		60.23						60.9246
59851@20201019_1_3409_iTRAQ.cmpd.rclb.mgf	193.65	778.195	4	0	-0.0002	0	2	ALEK	AGILPLAVGGQPWQAAGAFDVLMVAIAGK	DTFN	MOD:01485 A1;MOD:01485 K29	0	2233	Q2K7E8	Q2K7E8{175-203}	0.0001	0.0002	0.0003	Q2K7E8		74.45						108.339
56489@20201019_1_3409_iTRAQ.cmpd.rclb.mgf	180.92	1063.53	3	0	0.0131	0	2	APSR	VEGVFFFACNMDPSGTLEFVPTPVIDR	CFAR	MOD:01214 C9;MOD:01485 V1	0	1510	Q2KB19	Q2KB19{135-161}	0.0001	0.0002	0.0003	Q2KB19		25.3						56.8615
29563@20201019_1_3409_iTRAQ.cmpd.rclb.mgf	95.83	975.515	2	0	-0.0016	0	2		TSINTNNAAMAALQTLR	GINQ	MOD:01485 T1;MOD:00719 M10	0	5239	Q2KCF0	Q2KCF0{2-18}	0.0001	0.0002	0.0003	Q2KCF0		37.18		16.4883				54.621
58924@20201019_1_3409_iTRAQ.cmpd.rclb.mgf	190.57	757.914	4	0	0.0002	0	2	AKTK	ALASAFETLGLTNALFIGGAELDGNFK	LAAQ	MOD:01485 A1;MOD:01485 K27	0	3095	Q2K9L5	Q2K9L5{137-163}	0.0001	0.0002	0.0003	Q2K9L5		55.96						109.927
40949@20201019_1_3409_iTRAQ.cmpd.rclb.mgf	129.68	654.097	4	0	0.0052	0	2	PELK	SRPLDPHPLFASFIEAATEQSR	LV	MOD:01485 S1	0	9255	Q2K871	Q2K871{519-540}	0.0001	0.0002	0.0003	Q2K871		33.38						86.2703
41061@20201019_1_3409_iTRAQ.cmpd.rclb.mgf	130	839.675	4	0	-0.0012	1	2	QKLR	GLVSQQMTMMGTWLQTEQTDKDLAQAR	REKF	MOD:01485 G1;MOD:01485 K21	0	478	Q2K2Q6	Q2K2Q6{219-245}	0.0001	0.0002	0.0003	Q2K2Q6		47.64						82.7652
43708@20201019_1_3409_iTRAQ.cmpd.rclb.mgf	139.35	755.65	4	0	0.013	0	2	ADCK	LHLDSGVVLHAAGEATDPLLAFDAASER	IEKR	MOD:01485 L1	0	6535	Q2KD58	Q2KD58{76-103}	0.0001	0.0002	0.0003	Q2KD58		29.74						84.4102
43625@20201019_1_3409_iTRAQ.cmpd.rclb.mgf	139.1	812.924	4	0	0.0012	0	2	ELNR	AFAGAPWSGYVSPLHVVTSANVEFDGGPK	NSFD	MOD:01485 A1;MOD:01485 K29	0	4359	Q2K1J3	Q2K1J3{318-346}	0.0001	0.0002	0.0003	Q2K1J3		45.33						98.9258
28266@20201019_1_3409_iTRAQ.cmpd.rclb.mgf	91.8	751.366	4	0	0.0064	0	2	DAAK	AMVDQGVDVLTQHTDTTAPMQVAEER	GIHA	MOD:01485 A1;MOD:00719 M2	0	10500	Q2K8G8	Q2K8G8{204-229}	0.0001	0.0002	0.0003	Q2K8G8		47.48						109.926
49145@20201019_1_3409_iTRAQ.cmpd.rclb.mgf	156.22	945.973	4	0	-0.0045	0	2		AIHATDDTATFLETDVISGNLLSNDTSDGNLFLR	AFDQ	MOD:01485 A1	0	5138	Q2K591	Q2K591{2-35}	0.0001	0.0002	0.0003	Q2K591		53.93		39.6706				134.172
4252@20201019_1_3409_iTRAQ.cmpd.rclb.mgf	20.87	460.239	4	0	0.0024	2	2	DARR	FRETVSGDREAAEAR	LRTR	MOD:01485 F1	0	5397	Q2K6H1	Q2K6H1{104-118}	0.0001	0.0002	0.0003	Q2K6H1		46.63						75.4147
46369@20201019_1_3409_iTRAQ.cmpd.rclb.mgf	147.32	656.337	4	0	0.0043	0	2	LQFR	TDTNFGFAVPVSVDGVDGSILDPR	STWA	MOD:01485 T1	0	7556	Q2KE66	Q2KE66{466-489}	0.0001	0.0002	0.0003	Q2KE66		29.17						70.33
23258@20201019_1_3409_iTRAQ.cmpd.rclb.mgf	77.05	472.268	4	0	0.0038	0	2	NVMK	SGVLWNQVVTETHK	AKYS	MOD:01485 S1;MOD:01485 K14	0	2899	Q2K2V0	Q2K2V0{199-212}	0.0001	0.0002	0.0003	Q2K2V0		43.91						47.5037
14204@20201019_1_3409_iTRAQ.cmpd.rclb.mgf	50.28	410.987	4	0	0.0062	0	2	YFKK	HVVDTVTPDEIK	ARYD	MOD:01485 H1;MOD:01485 K12	0	463	Q2K3R8	Q2K3R8{110-121}	0.0001	0.0002	0.0003	Q2K3R8		44.66						45.2962
39117@20201019_1_3409_iTRAQ.cmpd.rclb.mgf	124.3	593.572	4	0	0.0037	0	2	TGLR	AGGDDYLPKPYAFSELLAR	VEVL	MOD:01485 A1;MOD:01485 Y6	0	10130	Q2KAN7	Q2KAN7{119-137}	0.0001	0.0002	0.0003	Q2KAN7		31.96						68.7106
24492@20201019_1_3409_iTRAQ.cmpd.rclb.mgf	80.72	390.247	4	0	-0.001	1	2	MDLK	RGIDLAVAEVVK	DLQA	MOD:01485 R1;MOD:01485 K12	0	6161	Q2KBZ7	Q2KBZ7{118-129}	0.0001	0.0002	0.0003	Q2KBZ7		41.54						35.8139
26922@20201019_1_3409_iTRAQ.cmpd.rclb.mgf	87.87	453.278	4	0	0.0009	0	2	VEAR	SGRPIGILADLQGPK	LRVG	MOD:01485 S1;MOD:01485 K15	0	110	Q2K4D8	Q2K4D8{61-75}	0.0001	0.0002	0.0003	Q2K4D8		28.7						42.8366
38936@20201019_1_3409_iTRAQ.cmpd.rclb.mgf	123.77	555.06	4	0	0.0019	1	2	KLDK	SKLPNLSNMWDVIQQR	TAAY	MOD:01485 S1;MOD:01485 K2	0	189	Q2KCA6	Q2KCA6{101-116}	0.0001	0.0002	0.0003	Q2KCA6		29.07						50.4297
31913@20201019_1_3409_iTRAQ.cmpd.rclb.mgf	102.73	625.09	4	0	-0.0024	0	2	AVVR	TIGGENTTLLCAAGGLPGELHK	LWPA	MOD:01214 C11;MOD:01485 T1;MOD:01485 K22	0	5869	Q2KAI9	Q2KAI9{406-427}	0.0001	0.0002	0.0003	Q2KAI9		42						60.8371
47519@20201019_1_3409_iTRAQ.cmpd.rclb.mgf	151.02	762.366	4	0	0.002	1	2	PGVK	FQTTDFFTPTRDFNADDVVFSFER	QLKA	MOD:01485 F1	0	474	Q2KC86	Q2KC86{96-119}	0.0001	0.0002	0.0003	Q2KC86		28.83						92.2658
51935@20201019_1_3409_iTRAQ.cmpd.rclb.mgf	165.87	792.412	4	0	0.013	0	2	GSSR	EQVLLSLGTPSTTATFDGEVFYYISQR	RTRA	MOD:01485 E1	0	3333	Q2KA05	Q2KA05{49-75}	0.0001	0.0002	0.0003	Q2KA05		26.72						73.134
11916@20201019_1_3409_iTRAQ.cmpd.rclb.mgf	43.58	588.86	2	0	-0.0041	0	2		TDLITPTK	TVDV	MOD:01485 T1;MOD:01485 K8	0	7968	Q2KC98	Q2KC98{2-9}	0.0001	0.0002	0.0003	Q2KC98		42.01						104.118
48119@20201019_1_3409_iTRAQ.cmpd.rclb.mgf	152.78	782.636	4	0	0.0021	1	2	YYKK	YFAEAADEKTYQTLDEAFQDLASGR	IDYV	MOD:01485 Y1;MOD:01485 Y11	0	876	Q2K1K6	Q2K1K6{148-172}	0.0001	0.0002	0.0003	Q2K1K6		50.05						89.073
21047@20201019_1_3409_iTRAQ.cmpd.rclb.mgf	70.55	625.084	4	0	-0.0012	1	2	MAGK	VAVVCGYGDVGKGSAASLSGAGAR	VKVT	MOD:01214 C5;MOD:01485 V1;MOD:01485 Y7	0	128	Q2KE72	Q2KE72{251-274}	0.0001	0.0002	0.0003	Q2KE72		46.22						93.5283
41279@20201019_1_3409_iTRAQ.cmpd.rclb.mgf	130.65	638.586	4	0	-0.0064	0	2	LMTK	TAPPGVSGFNWAEAQSAFLQGK	IGMW	MOD:01485 T1;MOD:01485 K22	0	376	Q2JZJ7	Q2JZJ7{256-277}	0.0001	0.0002	0.0003	Q2JZJ7		60.11						94.6466
55809@20201019_1_3409_iTRAQ.cmpd.rclb.mgf	178.57	530.064	4	0	0.0037	0	2	IMKK	DGGIVAAIVGVGGFLGIGEK	NVAV	MOD:01485 D1;MOD:01485 K20	0	2286	Q2KBX4	Q2KBX4{117-136}	0.0001	0.0002	0.0003	Q2KBX4		48.94						79.9135
52051@20201019_1_3409_iTRAQ.cmpd.rclb.mgf	166.2	823.061	5	1	-0.0093	1	2	DGIR	FVVGPVTSGVAIPVSDVLAENGVLMVTPTATAPDLTKR	GLAN	MOD:01485 F1;MOD:01485 K37	0	5167	Q2K5M7	Q2K5M7{93-130}	0.0001	0.0002	0.0003	Q2K5M7		47.62		36.1138				71.9113
30972@20201019_1_3409_iTRAQ.cmpd.rclb.mgf	99.95	837.675	4	0	0.005	1	2	DLGR	QQVQAEFGDKIETPYLENVPEGPDAER	AIER	MOD:01485 Q1;MOD:01485 Y15	0	10500	Q2K8G8	Q2K8G8{52-78}	0.0001	0.0002	0.0003	Q2K8G8		57.44						115.301
45949@20201019_1_3409_iTRAQ.cmpd.rclb.mgf	146.07	572.078	4	0	0.0042	0	2	IIEK	AVAEAASADPNLGPLLAAFAK	VLAE	MOD:01485 A1;MOD:01485 K21	0	952	Q2K588	Q2K588{120-140}	0.0001	0.0002	0.0003	Q2K588		48.54						78.3491
29281@20201019_1_3409_iTRAQ.cmpd.rclb.mgf	95	692.719	3	0	0.0013	0	2		AEITDPENTIILETTK	GKVV	MOD:01485 A1;MOD:01485 K16	0	2976	Q2K8D7	Q2K8D7{2-17}	0.0001	0.0002	0.0003	Q2K8D7		71.91						98.448
52954@20201019_1_3409_iTRAQ.cmpd.rclb.mgf	169.17	822.864	5	0	0.0026	1	2	DGIR	FVVGPVTSGVAIPVSDVLAENGVLMVTPTATAPDLTKR	GLAN	MOD:01485 F1;MOD:01485 K37	0	5167	Q2K5M7	Q2K5M7{93-130}	0.0001	0.0002	0.0003	Q2K5M7		39.8						53.9686
23364@20201019_1_3409_iTRAQ.cmpd.rclb.mgf	77.37	695.704	3	0	-0.0171	0	2	QANR	LSTVSDNIANVNTTGYK	AVST	MOD:01485 L1;MOD:01485 K17	0	1654	Q2KCE1	Q2KCE1{21-37}	0.0001	0.0002	0.0003	Q2KCE1		73.82						118.685
36484@20201019_1_3409_iTRAQ.cmpd.rclb.mgf	116.57	590.96	3	0	0.0086	0	2	KPGR	MMFEIDGVSEEIAR	EALR	MOD:01485 M1	0	6945	Q2K9K9	Q2K9K9{102-115}	0.0001	0.0002	0.0003	Q2K9K9		36.76						89.3788
46896@20201019_1_3409_iTRAQ.cmpd.rclb.mgf	149.2	912.995	4	0	-0.0187	0	2	PVTR	LTLVDAFQPPVPETLRPVATTQTVDLAAAGAADR	LIES	MOD:01485 L1	0	5637	Q2JZK5	Q2JZK5{24-57}	0.0001	0.0002	0.0003	Q2JZK5		26.97						95.0651
37215@20201019_1_3409_iTRAQ.cmpd.rclb.mgf	118.72	834.67	4	0	-0.0167	0	2	DVVK	QVGGDLVDVTSLVGPNGDPHEFEPSPADAK	NLKA	MOD:01485 Q1;MOD:01485 K30	0	10479	Q2KBK4	Q2KBK4{43-72}	0.0001	0.0002	0.0003	Q2KBK4		45.15		27.6741				94.9363
47681@20201019_1_3409_iTRAQ.cmpd.rclb.mgf	151.5	1109.55	4	0	0.0005	0	2	SLIR	IMQNVQPDEIYNLAAQSHVAVSFEEPEYTANSDALGALR	ILEA	MOD:01485 I1	0	9052	Q2KC60	Q2KC60{73-111}	0.0001	0.0002	0.0003	Q2KC60		51.36		26.2328				123.466
32937@20201019_1_3409_iTRAQ.cmpd.rclb.mgf	105.72	651.572	4	0	0.004	0	2	MNEK	GNVLGMMPHPENLIEAAHGGSDGR	GLFA	MOD:01485 G1	0	3589	Q2K7X5	Q2K7X5{188-211}	0.0001	0.0002	0.0003	Q2K7X5		51.25						61.6503
35095@20201019_1_3409_iTRAQ.cmpd.rclb.mgf	112.05	673.639	4	0	0.0003	1	2	TSSK	LRELVITDSIQPTTAVLSAHNIR	VVTT	MOD:01485 L1	0	6201	Q2K5U6	Q2K5U6{262-284}	0.0001	0.0002	0.0003	Q2K5U6		61.59						79.6065
33868@20201019_1_3409_iTRAQ.cmpd.rclb.mgf	108.45	702.089	4	0	0.0057	0	2	DQYK	AAYGHVLSGDYGTAEEEFNQYIAR	YPSS	MOD:01485 Y3	0	4009	Q2K4M0	Q2K4M0{131-154}	0.0001	0.0002	0.0003	Q2K4M0		38.69						69.237
32617@20201019_1_3409_iTRAQ.cmpd.rclb.mgf	104.78	761.373	4	0	0.0044	0	2	VEFK	HGGTEIEPGLADSWSVSADGTEYTFK	LHPG	MOD:01485 H1;MOD:01485 K26	0	474	Q2KC86	Q2KC86{64-89}	0.0001	0.0002	0.0003	Q2KC86		92.53						76.4003
45577@20201019_1_3409_iTRAQ.cmpd.rclb.mgf	144.97	810.65	4	0	0.0031	0	2	GADR	LIGGTGDDTYIVDNAGDLVTEAADAGTDTVR	TALS	MOD:01485 L1	0	6947	Q2KC97	Q2KC97{945-975,1548-1578}	0.0001	0.0002	0.0003	Q2KC97		88.83						114.893
42113@20201019_1_3409_iTRAQ.cmpd.rclb.mgf	133.23	809.767	3	0	-0.0022	0	2	PLAR	IVSWATAGVDPSIMGTGPIPASR	KALE	MOD:01485 I1	0	8991	Q2K324	Q2K324{276-298}	0.0001	0.0002	0.0003	Q2K324		93.89						118.571
47282@20201019_1_3409_iTRAQ.cmpd.rclb.mgf	150.33	811.441	3	1	-0.0071	0	2		PIDILMPALSPTMEEGTLSK	WLKQ	MOD:01485 P1;MOD:01485 K20	0	1883	Q2K8W6	Q2K8W6{2-21}	0.0001	0.0002	0.0003	Q2K8W6		59.45		35.5287				115.853
40200@20201019_1_3409_iTRAQ.cmpd.rclb.mgf	127.48	618.064	4	0	0.0007	0	2	PWNK	YVEGGSYEYAAGMGFPELIK	SVEK	MOD:01485 Y1;MOD:01485 K20	0	474	Q2KC86	Q2KC86{130-149}	0.0001	0.0002	0.0003	Q2KC86		76.83						81.3593
19666@20201019_1_3409_iTRAQ.cmpd.rclb.mgf	66.42	549.802	4	0	0.0023	0	2	NGQR	IPQPANPDGPATTTTIEGK	YGTL	MOD:01485 I1;MOD:01485 K19	0	3114	Q2K4M9	Q2K4M9{48-66}	0.0001	0.0002	0.0003	Q2K4M9		69.43						65.2212
59658@20201019_1_3409_iTRAQ.cmpd.rclb.mgf	193.02	772.665	4	1	0.0088	0	2	GIVK	EAFPLLTLFSETIGVNDLTVSSEMGK	GGAK	MOD:01485 E1;MOD:01485 K26	0	7488	Q2K5U5	Q2K5U5{260-285}	0.0001	0.0002	0.0003	Q2K5U5		60.67						114.365
18249@20201019_1_3409_iTRAQ.cmpd.rclb.mgf	62.28	543.469	5	0	0.0037	0	2	DKTK	VCFVYVGSHTDGGYSQAHDLGR	QQVQ	MOD:01214 C2;MOD:01485 V1;MOD:01485 Y5	0	10500	Q2K8G8	Q2K8G8{30-51}	0.0001	0.0002	0.0003	Q2K8G8		43.73						61.1616
60379@20201019_1_3409_iTRAQ.cmpd.rclb.mgf	197.05	1192.66	3	0	0.0035	1	2	LLAR	QVGVPAIVVFLNKVDQVDDAELLELVELEVR	ELLS	MOD:00040 Q1;MOD:01485 K13	0	9836	Q2K9N2	Q2K9N2{120-150}	0.0001	0.0002	0.0003	Q2K9L8;Q2K9N2		26.81		27.8506				83.061
40916@20201019_1_3409_iTRAQ.cmpd.rclb.mgf	129.58	575.063	4	0	0.002	1	2	DRLK	RLETELTALEEEAHALTAR	WQAE	MOD:01485 R1	0	8430	Q2K3T4	Q2K3T4{444-462}	0.0001	0.0002	0.0003	Q2K3T4		31.1						55.6876
56161@20201019_1_3409_iTRAQ.cmpd.rclb.mgf	179.85	925.131	3	0	-0.0051	0	2	QVRR	NTELFQQAMQMFSPFMAPPAAK	ESRK	MOD:01485 N1;MOD:01485 K22	0	9443	Q2K325	Q2K325{143-164}	0.0001	0.0002	0.0003	Q2K325		34.77						77.7046
60301@20201019_1_3409_iTRAQ.cmpd.rclb.mgf	195.65	753.214	5	0	-0.02	1	2	DRRK	AMLEDIAILTGGTVISEDLGIKLESVTLDMLGR	AKKV	MOD:01485 A1;MOD:01485 K22	0	6161	Q2KBZ7	Q2KBZ7{287-319}	0.0001	0.0002	0.0003	Q2KBZ7		34.03		32.325				74.9237
30284@20201019_1_3409_iTRAQ.cmpd.rclb.mgf	97.97	505.278	4	0	0.0159	0	2	GRER	GYHGVNFGGISVGGIVANR	KMFG	MOD:01485 G1	0	10357	Q2K5N0	Q2K5N0{146-164}	0.0001	0.0002	0.0003	Q2K5N0		49.06						52.1241
49774@20201019_1_3409_iTRAQ.cmpd.rclb.mgf	158.95	1193.13	4	0	0.0034	0	2	EQHR	AEIGVPVVTYESTASVVPADPQPAPGDELIGPVGAVETITPPETVR	TYIE	MOD:01485 A1	0	3301	Q2K5V7	Q2K5V7{99-144}	0.0001	0.0002	0.0003	Q2K5V7		46.29		27.296				115.084
18661@20201019_1_3409_iTRAQ.cmpd.rclb.mgf	63.5	487.272	4	0	-0.001	0	2	TGSK	QGITTPPGNPAYNISK	SGVK	MOD:01485 Q1;MOD:01485 K16	0	377	Q2K3B6	Q2K3B6{158-173}	0.0001	0.0002	0.0003	Q2K3B6		34.12						67.8909
27986@20201019_1_3409_iTRAQ.cmpd.rclb.mgf	90.98	593.309	4	0	0.0055	0	2	PHGK	AVGDGNNYAHWLLWSHGGK	MVDE	MOD:01485 A1;MOD:01485 K19	0	2207	Q2JZK2	Q2JZK2{200-218}	0.0001	0.0002	0.0003	Q2JZK2		78.24						71.735
881@20201019_1_3409_iTRAQ.cmpd.rclb.mgf	10.83	443.55	3	1	-0.0064	1	2	VVAK	SDDRESTFAR	SDKD	MOD:01485 S1	0	4841	Q2K0B9	Q2K0B9{59-68}	0.0001	0.0002	0.0003	Q2K0B9		63.34						60.6949
31708@20201019_1_3409_iTRAQ.cmpd.rclb.mgf	102.12	645.677	3	1	-0.0139	0	2		TSINTNNAAMAALQTLR	GINQ	MOD:01485 T1	0	5239	Q2KCF0	Q2KCF0{2-18}	0.0001	0.0002	0.0003	Q2KCF0		57.18						103.956
11444@20201019_1_3409_iTRAQ.cmpd.rclb.mgf	42.2	416.48	4	0	0.0026	0	2	HADR	HVGGTYTFHVEK	SGDG	MOD:01485 H1;MOD:01485 K12	0	6271	Q2K0F6	Q2K0F6{62-73}	0.0001	0.0002	0.0003	Q2K0F6		64.24						41.9365
18038@20201019_1_3409_iTRAQ.cmpd.rclb.mgf	61.67	501.009	4	0	0.0015	0	2	SGDR	VIAENYLQHAEHYNR	IIAS	MOD:01485 V1	0	7196	Q2K3T3	Q2K3T3{76-90}	0.0001	0.0002	0.0003	Q2K3T3		24.8						53.8624
30579@20201019_1_3409_iTRAQ.cmpd.rclb.mgf	98.82	747.369	4	0	0.0099	0	2	DAAK	AMVDQGVDVLTQHTDTTAPMQVAEER	GIHA	MOD:01485 A1	0	10500	Q2K8G8	Q2K8G8{204-229}	0.0001	0.0002	0.0003	Q2K8G8		55.28						107.265
50431@20201019_1_3409_iTRAQ.cmpd.rclb.mgf	161.28	913.112	3	0	-0.0159	0	2	FHVK	ADGSFTYDLTADLDAGVTYTEVLR	YYKI	MOD:01485 A1	0	201	Q2K1Q3	Q2K1Q3{184-207}	0.0001	0.0002	0.0003	Q2K1Q3		54.53						105.176
47160@20201019_1_3409_iTRAQ.cmpd.rclb.mgf	149.97	843.474	2	0	0.0014	0	2	AINK	QAVIDAVFQGAAAVAK	NPIP	MOD:00040 Q1;MOD:01485 K16	0	474	Q2KC86	Q2KC86{316-331}	0.0001	0.0002	0.0003	Q2KC86		37.97						103.829
51922@20201019_1_3409_iTRAQ.cmpd.rclb.mgf	165.83	698.872	4	0	-0.0007	1	2	IALK	AGLGEIEIDESELQAAFEDLAKR	FRGG	MOD:01485 A1;MOD:01485 K22	0	88	Q2K2P3	Q2K2P3{37-59}	0.0001	0.0002	0.0003	Q2K2P3		68.48						89.5719
46513@20201019_1_3409_iTRAQ.cmpd.rclb.mgf	147.83	645.36	4	0	-0.0054	0	2	DRLR	LIVDPEQAHITAWDLADALAK	GSPP	MOD:01485 L1;MOD:01485 K21	0	3043	Q2K0Y3	Q2K0Y3{308-328}	0.0001	0.0002	0.0003	Q2K0Y3		30.15						82.6328
11625@20201019_1_3409_iTRAQ.cmpd.rclb.mgf	42.73	418.22	4	0	0.0015	0	2	TPYK	GVSTDAYANPQMK	KEGE	MOD:01485 G1;MOD:01485 K13	0	4702	Q2KCC4	Q2KCC4{384-396}	0.0001	0.0002	0.0003	Q2KCC4		29.54						56.5778
29568@20201019_1_3409_iTRAQ.cmpd.rclb.mgf	95.85	529.545	4	0	0.0048	0	2	DQNR	VYLPHPEILESVQPGHR	LLID	MOD:01485 V1	0	110	Q2K4D8	Q2K4D8{108-124}	0.0001	0.0002	0.0003	Q2K4D8		47.58						57.2204
31025@20201019_1_3409_iTRAQ.cmpd.rclb.mgf	100.12	731.629	4	0	0.0054	0	2	LITR	TFEALEGANRPIVHFYNSTSELQR	RVVF	MOD:01485 T1	0	10293	Q2K5Q2	Q2K5Q2{124-147}	0.0001	0.0002	0.0003	Q2K5Q2		30.78						87.7074
52871@20201019_1_3409_iTRAQ.cmpd.rclb.mgf	168.93	822.864	5	0	0.0029	1	2	DGIR	FVVGPVTSGVAIPVSDVLAENGVLMVTPTATAPDLTKR	GLAN	MOD:01485 F1;MOD:01485 K37	0	5167	Q2K5M7	Q2K5M7{93-130}	0.0001	0.0002	0.0003	Q2K5M7		55.63						64.9135
28781@20201019_1_3409_iTRAQ.cmpd.rclb.mgf	93.52	673.107	4	0	-0.0026	1	2	EGAR	IDDQTDDNRLIIQYNNQVIVR	SDDD	MOD:01485 I1	0	1630	Q2K7J1	Q2K7J1{455-475}	0.0001	0.0002	0.0003	Q2K7J1		35.8		34.8251				71.4744
45396@20201019_1_3409_iTRAQ.cmpd.rclb.mgf	144.43	767.012	5	0	-0.0022	0	2	DGVK	FVIGHFNSGVSIPASEVYAENGILEITPAATNPK	FTER	MOD:01485 F1;MOD:01485 K34	0	3055	Q2K502	Q2K502{94-127}	0.0001	0.0002	0.0003	Q2K502		36.05						76.6397
42345@20201019_1_3409_iTRAQ.cmpd.rclb.mgf	135.18	565.294	4	0	-0.001	0	2	GAAK	VDTAYSAMDSAIDVVGDIK	AKLV	MOD:01485 V1;MOD:01485 K19	0	5239	Q2KCF0	Q2KCF0{74-92}	0.0001	0.0002	0.0003	Q2KCF0		27.82						69.9017
43101@20201019_1_3409_iTRAQ.cmpd.rclb.mgf	137.55	606.829	4	0	0.0059	0	2	GFER	GQPWLQEVTVPDNLPWEK	SGLG	MOD:01485 G1;MOD:01485 K18	0	2517	Q2K699	Q2K699{244-261}	0.0001	0.0002	0.0003	Q2K699		43.86						55.2867
9022@20201019_1_3409_iTRAQ.cmpd.rclb.mgf	35.08	530.598	3	1	-0.0131	0	2	KFDK	SFNEAAYNGAEK	FKAE	MOD:01485 S1;MOD:01485 K12	0	2076	Q2KDS5	Q2KDS5{38-49}	0.0001	0.0002	0.0003	Q2KDS5		34.47						73.8337
25046@20201019_1_3409_iTRAQ.cmpd.rclb.mgf	82.35	599.572	4	0	-0.0042	0	2	YTNK	NVVWANNITYNGTAGQASVK	TDGG	MOD:01485 N1;MOD:01485 K20	0	8866	Q2K908	Q2K908{305-324}	0.0001	0.0002	0.0003	Q2K908		26.13						71.132
30320@20201019_1_3409_iTRAQ.cmpd.rclb.mgf	98.07	599.076	4	0	-0.0024	0	2	TLGR	IMNVIGEPVDEAGPLNTAHK	RAIH	MOD:01485 I1;MOD:01485 K20	0	8381	Q2K3H0	Q2K3H0{93-112}	0.0001	0.0002	0.0003	Q2K3H0		72						77.8293
26271@20201019_1_3409_iTRAQ.cmpd.rclb.mgf	85.95	573.523	4	1	-0.0045	0	2	THAK	DGSDPIAEFADGTTTGHIDAR	RAKE	MOD:01485 D1	0	6923	Q2K351	Q2K351{21-41}	0.0001	0.0002	0.0003	Q2K351		35.55						62.996
51529@20201019_1_3409_iTRAQ.cmpd.rclb.mgf	164.68	687.063	3	0	-0.0035	0	2	FHAK	VVDATIDHFILEITGK	SSKI	MOD:01485 V1;MOD:01485 K16	0	1404	Q2K6H8	Q2K6H8{141-156}	0.0001	0.0002	0.0003	Q2K6H8		43.22						105.846
25665@20201019_1_3409_iTRAQ.cmpd.rclb.mgf	84.17	492.032	4	0	-0.0055	0	2	IFKK	SNVAVVTGGASGIGFAAAK	YFAG	MOD:01485 S1;MOD:01485 K19	0	377	Q2K3B6	Q2K3B6{18-36}	0.0001	0.0002	0.0003	Q2K3B6		33.1						64.8179
26961@20201019_1_3409_iTRAQ.cmpd.rclb.mgf	87.97	570.316	4	0	0.0039	0	2	DGGK	SLASVIEAHGHGEVVDLEK	AYAE	MOD:01485 S1;MOD:01485 K19	0	1125	Q2K5F8	Q2K5F8{71-89}	0.0001	0.0002	0.0003	Q2K5F8		41.9						87.057
12467@20201019_1_3409_iTRAQ.cmpd.rclb.mgf	45.2	440.511	4	0	0.0076	1	2	GEPK	QGVSAANKVVGDGIR	FVVG	MOD:01485 Q1;MOD:01485 K8	0	5167	Q2K5M7	Q2K5M7{78-92}	0.0001	0.0002	0.0003	Q2K5M7		38						77.0694
46670@20201019_1_3409_iTRAQ.cmpd.rclb.mgf	148.53	743.572	5	0	-0.001	0	2	NIVK	QLQAAGYGTDLQYGDDDIPNQLSQIENMVTK	GVKV	MOD:01485 Q1;MOD:01485 K31	0	5613	Q2K5F5	Q2K5F5{52-82}	0.0001	0.0002	0.0003	Q2K5F5		29.35						76.2832
24732@20201019_1_3409_iTRAQ.cmpd.rclb.mgf	81.43	492.668	5	0	0.0029	1	2	LEEK	VATDLDAAIADAEKRPETER	KRVL	MOD:01485 V1;MOD:01485 K14	0	3896	Q2K553	Q2K553{170-189}	0.0001	0.0002	0.0003	Q2K553		34.27						81.1692
31905@20201019_1_3409_iTRAQ.cmpd.rclb.mgf	102.7	538.047	4	0	0.0021	0	2	VRSR	VGGYLQEVHFEDGALVK	QGDL	MOD:01485 Y4;MOD:01485 K17	0	9786	Q2K4W3	Q2K4W3{66-82}	0.0001	0.0002	0.0003	Q2K4W3		81.36						63.5987
21806@20201019_1_3409_iTRAQ.cmpd.rclb.mgf	72.77	479.292	4	0	0.0003	2	2	ETPR	RIPNSITEAVLEKR	NKAT	MOD:01485 R1;MOD:01485 K13	0	7218	Q2K5T2	Q2K5T2{401-414}	0.0001	0.0002	0.0003	Q2K5T2		41.63						37.3409
50964@20201019_1_3409_iTRAQ.cmpd.rclb.mgf	163.02	673.154	4	1	-0.0187	1	2	KILR	VLAPLGVLLPNGLGLNVDGKDIGR	AYFV	MOD:01485 V1;MOD:01485 K20	0	2314	Q2KBM4	Q2KBM4{181-204}	0.0001	0.0002	0.0003	Q2KBM4		27.09						75.3391
50487@20201019_1_3409_iTRAQ.cmpd.rclb.mgf	161.6	710.368	4	0	0.0044	0	2	EKFK	AAGFNPEAYTLYSYAAMQAIAGAAK	AAGS	MOD:01485 A1;MOD:01485 K25	0	3055	Q2K502	Q2K502{289-313}	0.0001	0.0002	0.0003	Q2K502		65.77						87.7492
27130@20201019_1_3409_iTRAQ.cmpd.rclb.mgf	88.47	975.517	2	0	0.0018	0	2		TSINTNNAAMAALQTLR	GINQ	MOD:01485 T1;MOD:00719 M10	0	5239	Q2KCF0	Q2KCF0{2-18}	0.0001	0.0002	0.0003	Q2KCF0		31.33		13.2942				51.1026
7132@20201019_1_3409_iTRAQ.cmpd.rclb.mgf	29.38	430.233	4	0	0.0055	0	2	KVEK	GAGSITAHVETSDGK	VQQI	MOD:01485 G1;MOD:01485 K15	0	7963	O05940	O05940{258-272}	0.0001	0.0002	0.0003	O05940		38.61						54.2321
4490@20201019_1_3409_iTRAQ.cmpd.rclb.mgf	21.57	479.263	2	0	0.0011	0	2	LIIR	QAADQGLK	ATLV	MOD:00040 Q1;MOD:01485 K8	0	3055	Q2K502	Q2K502{234-241}	0.0001	0.0002	0.0003	Q2K502		26.31						68.6081
54375@20201019_1_3409_iTRAQ.cmpd.rclb.mgf	173.35	849.195	4	0	0.006	0	2	GGNK	VSEMSLTIYGDTIADGQHISLAALGAVDFVR	FDIQ	MOD:01485 V1	0	6636	Q2K890	Q2K890{219-249}	0.0001	0.0002	0.0003	Q2K890		34.46						92.5976
31217@20201019_1_3409_iTRAQ.cmpd.rclb.mgf	100.68	544.805	4	0	0.0012	0	2	ERHR	AVTGDAAFVSHISDITVGK	GTEL	MOD:01485 A1;MOD:01485 K19	0	6181	Q2K806	Q2K806{193-211}	0.0001	0.0002	0.0003	Q2K806		30.46						47.8716
46076@20201019_1_3409_iTRAQ.cmpd.rclb.mgf	146.45	756.395	4	0	-0.0068	0	2	ADGK	MAQLNQQPLGTGPFTFVAYQPDAVIR	YKAN	MOD:01485 M1;MOD:00719 M1	0	474	Q2KC86	Q2KC86{196-221}	0.0001	0.0002	0.0003	Q2KC86		30.07						68.9041
45077@20201019_1_3409_iTRAQ.cmpd.rclb.mgf	143.52	639.344	6	0	-0.0025	0	2	DGVK	FVIGHFNSGVSIPASEVYAENGILEITPAATNPK	FTER	MOD:01485 F1;MOD:01485 K34	0	3055	Q2K502	Q2K502{94-127}	0.0001	0.0002	0.0003	Q2K502		30.68						52.0182
30396@20201019_1_3409_iTRAQ.cmpd.rclb.mgf	98.28	747.369	4	0	0.0099	0	2	DAAK	AMVDQGVDVLTQHTDTTAPMQVAEER	GIHA	MOD:01485 A1	0	10500	Q2K8G8	Q2K8G8{204-229}	0.0001	0.0002	0.0003	Q2K8G8		162.08						124.521
37135@20201019_1_3409_iTRAQ.cmpd.rclb.mgf	118.48	529.56	4	0	0.0033	0	2	PEAK	INFLNTDPAVSQIPAVK	NKAL	MOD:01485 I1;MOD:01485 K17	0	5056	Q2JZ27	Q2JZ27{304-320}	0.0001	0.0002	0.0003	Q2JZ27		50.23						63.3255
46509@20201019_1_3409_iTRAQ.cmpd.rclb.mgf	147.8	1008.52	3	1	-0.0079	0	2	ADGK	MAQLNQQPLGTGPFTFVAYQPDAVIR	YKAN	MOD:01485 M1;MOD:00719 M1	0	474	Q2KC86	Q2KC86{196-221}	0.0001	0.0002	0.0003	Q2KC86		31.6						73.9742
35959@20201019_1_3409_iTRAQ.cmpd.rclb.mgf	115.02	715.38	2	0	0.0007	0	2	NGER	QVGLDIAEAMQK	VGNE	MOD:00040 Q1;MOD:01485 K12	0	6161	Q2KBZ7	Q2KBZ7{157-168}	0.0001	0.0002	0.0003	Q2KBZ7		53.79		29.2644				102.876
52036@20201019_1_3409_iTRAQ.cmpd.rclb.mgf	166.15	1184.91	3	0	0.0067	0	2	NIVK	QLQAAGYGTDLQYGDDDIPNQLSQIENMVTK	GVKV	MOD:00040 Q1;MOD:01485 K31	0	5613	Q2K5F5	Q2K5F5{52-82}	0.0001	0.0002	0.0003	Q2K5F5		56						104.929
37095@20201019_1_3409_iTRAQ.cmpd.rclb.mgf	118.37	754.372	4	1	0.0042	0	2	VPYK	GTGPAMTDLLGGQVDIMCDQTTNTTK	QIKG	MOD:01214 C18;MOD:01485 G1;MOD:01485 K26	0	8013	Q2K4P7	Q2K4P7{187-212}	0.0001	0.0002	0.0003	Q2K4P7		46.11						83.8551
11203@20201019_1_3409_iTRAQ.cmpd.rclb.mgf	41.5	359.557	3	0	-0.0078	0	2	GQGK	GALDTALK	IAKG	MOD:01485 G1;MOD:01485 K8	0	7433	Q2K354	Q2K354{272-279}	0.0001	0.0002	0.0003	Q2K354		41.45						55.6078
12117@20201019_1_3409_iTRAQ.cmpd.rclb.mgf	44.17	503.013	4	0	0.0072	2	2	LQIR	ETIDRDYQVEGDLRR	ETAM	MOD:01485 E1	0	5890	Q2K9J4	Q2K9J4{58-72}	0.0001	0.0002	0.0003	Q2K9J4		29.37						45.1554
37465@20201019_1_3409_iTRAQ.cmpd.rclb.mgf	119.45	514.304	4	0	0.0035	1	2		AVSANRLELLQIADAVAR	EKVI	MOD:01485 A1	0	7463	Q2KDZ3	Q2KDZ3{2-19}	0.0001	0.0002	0.0003	Q2KDZ3		41.33						90.7326
23435@20201019_1_3409_iTRAQ.cmpd.rclb.mgf	77.58	497.275	4	0	-0.005	0	2	GLIR	HAGLSEVSVAEIEAASK	HFKV	MOD:01485 H1;MOD:01485 K17	0	4453	Q2KD16	Q2KD16{159-175}	0.0001	0.0002	0.0003	Q2KD16		65.2						53.9571
48132@20201019_1_3409_iTRAQ.cmpd.rclb.mgf	152.82	1043.18	3	0	-0.0056	1	2	YYKK	YFAEAADEKTYQTLDEAFQDLASGR	IDYV	MOD:01485 Y1;MOD:01485 Y11	0	876	Q2K1K6	Q2K1K6{148-172}	0.0001	0.0002	0.0003	Q2K1K6		41.37						104.485
46566@20201019_1_3409_iTRAQ.cmpd.rclb.mgf	148.12	929.213	4	0	0.0009	0	2	NIVK	QLQAAGYGTDLQYGDDDIPNQLSQIENMVTK	GVKV	MOD:01485 Q1;MOD:01485 K31	0	5613	Q2K5F5	Q2K5F5{52-82}	0.0001	0.0002	0.0003	Q2K5F5		88.93						126.106
38558@20201019_1_3409_iTRAQ.cmpd.rclb.mgf	122.65	719.616	4	0	0.0025	0	2	VAMK	AVNAGEVEGAVIYHYYWFGDQAK	TGEN	MOD:01485 A1;MOD:01485 K23	0	2055	Q2K2Y6	Q2K2Y6{212-234}	0.0001	0.0002	0.0003	Q2K2Y6		95.73						102.848
40765@20201019_1_3409_iTRAQ.cmpd.rclb.mgf	129.15	493.787	4	0	0.0065	1	2	DVYK	HFGITADAVVAAAEAKL		MOD:01485 H1;MOD:01485 K16	0	4943	Q2K4I5	Q2K4I5{632-648}	0.0001	0.0002	0.0003	Q2K4I5		48.16						44.4944
25281@20201019_1_3409_iTRAQ.cmpd.rclb.mgf	83.03	546.288	4	0	0.0091	0	2	QVAK	ATGAEPGGELYVESLSDAK	GPAP	MOD:01485 A1;MOD:01485 K19	0	10479	Q2KBK4	Q2KBK4{256-274}	0.0001	0.0002	0.0003	Q2KBK4		60.78						63.1766
3760@20201019_1_3409_iTRAQ.cmpd.rclb.mgf	19.43	427.24	4	0	0.0047	0	2	ILVK	GNHLDQTHAISPK	GVIA	MOD:01485 G1;MOD:01485 K13	0	1972	Q2K708	Q2K708{196-208}	0.0001	0.0002	0.0003	Q2K708		33.94						105.194
38915@20201019_1_3409_iTRAQ.cmpd.rclb.mgf	123.7	649.871	4	0	-0.008	1	2	DLAK	SGLITVNPVGTRYEVIYDLAK	LLTK	MOD:01485 S1;MOD:01485 K21	0	7488	Q2K5U5	Q2K5U5{48-68}	0.0001	0.0002	0.0003	Q2K5U5		26.82						78.3751
46047@20201019_1_3409_iTRAQ.cmpd.rclb.mgf	146.37	725.388	4	0	-0.0044	1	2	NWRR	VAHIIADAIYKQITGEEGYFDTR	VVFV	MOD:01485 V1;MOD:01485 K11	0	9537	Q2K4L8	Q2K4L8{147-169}	0.0001	0.0002	0.0003	Q2K4L8		31.19						78.0668
51413@20201019_1_3409_iTRAQ.cmpd.rclb.mgf	164.33	626.333	4	0	0.0006	0	2	KDRK	FLTAGGVFDDDQIDAFIELK	MAEV	MOD:01485 F1;MOD:01485 K20	0	4729	Q2K8F0	Q2K8F0{428-447}	0.0001	0.0002	0.0003	Q2K8F0		48.48						78.3955
47010@20201019_1_3409_iTRAQ.cmpd.rclb.mgf	149.53	775.878	4	0	-0.0014	1	2	KEPR	DFQPEDYSELEGEMLKHFEAELR	EAYK	MOD:01485 D1;MOD:01485 K16	0	984	Q2KE00	Q2KE00{232-254}	0.0001	0.0002	0.0003	Q2KE00		28.71						84.329
46881@20201019_1_3409_iTRAQ.cmpd.rclb.mgf	149.15	720.894	4	0	0	0	2	NFGK	IATESGAELVGTDGFDQSIQLVLTK	RADA	MOD:01485 I1;MOD:01485 K25	0	4137	Q2K336	Q2K336{155-179}	0.0001	0.0002	0.0003	Q2K336		32.63						87.1792
57923@20201019_1_3409_iTRAQ.cmpd.rclb.mgf	186.58	632.096	4	0	0.0083	0	2	FMCR	GHQLADVAAVLGSLDIVFGEVDR		MOD:01485 G1	0	10578	Q2K9T1	Q2K9T1{374-396}	0.0001	0.0002	0.0003	Q2K9T1		36.94						65.0288
29540@20201019_1_3409_iTRAQ.cmpd.rclb.mgf	95.77	562.558	4	0	0.0027	0	2	RMSK	GTNVQDWNQATNLVITGK	AGGQ	MOD:01485 G1;MOD:01485 K18	0	2233	Q2K7E8	Q2K7E8{239-256}	0.0001	0.0002	0.0003	Q2K7E8		82.37						77.7002
45282@20201019_1_3409_iTRAQ.cmpd.rclb.mgf	144.1	958.512	4	0	-0.0043	0	2	DGVK	FVIGHFNSGVSIPASEVYAENGILEITPAATNPK	FTER	MOD:01485 F1;MOD:01485 K34	0	3055	Q2K502	Q2K502{94-127}	0.0001	0.0002	0.0003	Q2K502		27.52						101.635
941@20201019_1_3409_iTRAQ.cmpd.rclb.mgf	11	405.954	4	0	-0.0009	1	2	NTFR	TCGRDDQQGAIAGK	YLAD	MOD:01214 C2;MOD:01485 K14	0	3055	Q2K502	Q2K502{139-152}	0.0001	0.0002	0.0003	Q2K502		32.29						39.5725
22489@20201019_1_3409_iTRAQ.cmpd.rclb.mgf	74.75	640.684	3	0	0.0067	0	2		TSINTNSSAQAALQTLR	NVNQ	MOD:01485 T1	0	5239	Q2KCF1	Q2KCF1{2-18}	0.0001	0.0002	0.0003	Q2KCF1		92.03						104.4
44312@20201019_1_3409_iTRAQ.cmpd.rclb.mgf	141.13	573.303	4	0	0.0054	1	2	AASR	IRDEVQDDADIVVGAIFDR	SLDG	MOD:01485 I1	0	7774	Q2K6Y8	Q2K6Y8{284-302}	0.0001	0.0002	0.0003	Q2K6Y8		55.46						87.5808
49448@20201019_1_3409_iTRAQ.cmpd.rclb.mgf	158	685.091	4	0	0.0017	0	2	FHVK	ADGSFTYDLTADLDAGVTYTEVLR	YYKI	MOD:01485 A1	0	201	Q2K1Q3	Q2K1Q3{184-207}	0.0001	0.0002	0.0003	Q2K1Q3		28.51						44.4165
31853@20201019_1_3409_iTRAQ.cmpd.rclb.mgf	102.55	614.319	4	0	0.0188	0	2	AHSK	IAWVNYAGLEDDPNHALQQR	YSPK	MOD:01485 I1	0	2995	Q2K9V7	Q2K9V7{315-334}	0.0001	0.0002	0.0003	Q2K9V7		40.53						62.7554
50788@20201019_1_3409_iTRAQ.cmpd.rclb.mgf	162.5	724.976	5	1	-0.0105	0	2	DMSK	VVIGGVDATQDALAAMQAGDLDVTVFQDAAGQGK	GALD	MOD:01485 V1;MOD:01485 K34	0	7433	Q2K354	Q2K354{238-271}	0.0001	0.0002	0.0003	Q2K354		29.6		28.3986				72.1506
36804@20201019_1_3409_iTRAQ.cmpd.rclb.mgf	117.52	1092.5	3	0	-0.0014	0	2	AWSK	TLVYCSEGSPEGFDPSLYTSGTTFDASSR	TVYS	MOD:01214 C5;MOD:01485 T1	0	474	Q2KC86	Q2KC86{25-53}	0.0001	0.0002	0.0003	Q2KC86		97.35						144.166
47567@20201019_1_3409_iTRAQ.cmpd.rclb.mgf	151.17	625.855	4	0	-0.0015	0	2	PKVK	TIGYLYNSGEANSVSLLAVLK	AEAE	MOD:01485 T1;MOD:01485 K21	0	5726	Q2K3B2	Q2K3B2{156-176}	0.0001	0.0002	0.0003	Q2K3B2		25.57						55.1345
35703@20201019_1_3409_iTRAQ.cmpd.rclb.mgf	114.28	581.077	4	0	-0.0056	0	2	VASK	TSDIAGDGTTTATVLAQAIVK	EGAK	MOD:01485 T1;MOD:01485 K21	0	6161	Q2JYW6	Q2JYW6{81-101}	0.0001	0.0002	0.0003	Q2JYW6		33.6						67.4378
34580@20201019_1_3409_iTRAQ.cmpd.rclb.mgf	110.53	582.549	4	0	0.001	1	2	SVAK	EIELEDKFENMGAQMVR	EVAS	MOD:01485 E1;MOD:01485 K7	0	6161	Q2JYW6;Q2KBZ7	Q2JYW6{59-75};Q2KBZ7{59-75}	0.0001	0.0002	0.0003	Q2JYW6;Q2KBZ7		37.19						69.1267
41197@20201019_1_3409_iTRAQ.cmpd.rclb.mgf	130.42	701.398	4	0	0.0026	1	2	LIAK	MKEAGVSIIYWGGLHTEAGLIIR	QAAD	MOD:01485 M1;MOD:01485 K2	0	3055	Q2K502	Q2K502{211-233}	0.0001	0.0002	0.0003	Q2K502		37.54						66.0929
37466@20201019_1_3409_iTRAQ.cmpd.rclb.mgf	119.45	558.31	4	0	-0.008	0	2	LGQK	AEADLEGVDILVNNAGITK	DGLF	MOD:01485 A1;MOD:01485 K19	0	3462	Q2KA90	Q2KA90{74-92}	0.0001	0.0002	0.0003	Q2KA90		31.34						71.7095
13400@20201019_1_3409_iTRAQ.cmpd.rclb.mgf	47.92	471.773	2	0	-0.0031	0	2	QGIK	QIAVDAAK	MITD	MOD:00040 Q1;MOD:01485 K8	0	10293	Q2K5Q2	Q2K5Q2{160-167}	0.0001	0.0002	0.0003	Q2K5Q2		25.01		9.19987				61.774
35443@20201019_1_3409_iTRAQ.cmpd.rclb.mgf	113.17	689.885	4	0	0.0005	0	2	SSLK	GVGYGTAAQPLPIVTGQDAEIPSVK	SIIA	MOD:01485 G1;MOD:01485 K25	0	5613	Q2K5F5	Q2K5F5{249-273}	0.0001	0.0002	0.0003	Q2K5F5		101.65						92.1999
22559@20201019_1_3409_iTRAQ.cmpd.rclb.mgf	74.97	510.279	3	0	0.0119	0	2	LVVK	SLGNGFFDAANK	GAQE	MOD:01485 S1;MOD:01485 K12	0	1153	Q2K0S9	Q2K0S9{35-46}	0.0001	0.0002	0.0003	Q2K0S9		40.98						75.8811
22825@20201019_1_3409_iTRAQ.cmpd.rclb.mgf	75.73	490.518	4	0	0.003	0	2	AEER	GIHAFGQASDMIAAGPK	AQLT	MOD:01485 G1;MOD:01485 K17	0	10500	Q2K8G8	Q2K8G8{230-246}	0.0001	0.0002	0.0003	Q2K8G8		54.62						61.3451
42229@20201019_1_3409_iTRAQ.cmpd.rclb.mgf	134.67	629.33	4	0	-0.0043	0	2	QGVK	ADAVAAGASAAAADEALAGAEIDPK	VLSR	MOD:01485 A1;MOD:01485 K25	0	2517	Q2K699	Q2K699{51-75}	0.0001	0.0002	0.0003	Q2K699		78.69						89.7406
51164@20201019_1_3409_iTRAQ.cmpd.rclb.mgf	163.6	888.96	4	0	0.0036	0	2	TFKR	NSDPSLPASHLVEIVFSVPPNFEGGSIESVQR	ISMK	MOD:01485 N1	0	7116	Q2K4Y0	Q2K4Y0{704-735}	0.0001	0.0002	0.0003	Q2K4Y0		31.22						87.3584
58849@20201019_1_3409_iTRAQ.cmpd.rclb.mgf	190.33	971.715	5	0	0.009	1	2	GIGR	LVDADMEEESSKLSALQTQQQLAVQSLSIANSSSQTILSLFR	G	MOD:01485 L1;MOD:01485 K12	0	5239	Q2KCF0	Q2KCF0{260-301}	0.0001	0.0002	0.0003	Q2KCF0		49.12						119.491
3563@20201019_1_3409_iTRAQ.cmpd.rclb.mgf	18.85	475.583	3	0	0.0052	1	2	FLPR	AYREGTDLEAR	ANMM	MOD:01485 A1	0	8885	Q2K684	Q2K684{274-284}	0.0001	0.0002	0.0003	Q2K684		51.46						64.1006
39482@20201019_1_3409_iTRAQ.cmpd.rclb.mgf	125.37	604.829	4	0	-0.0015	0	2	KGMK	AAQVANHPVWEVPYLPIDPR	DVGR	MOD:01485 A1	0	10293	Q2K5Q2	Q2K5Q2{358-377}	0.0001	0.0002	0.0003	Q2K5Q2		46.33						73.4272
24722@20201019_1_3409_iTRAQ.cmpd.rclb.mgf	81.38	659.832	4	0	-0.005	0	2	CAER	GITVASHDDATLSHVDEAIDNGVR	LAEF	MOD:01485 G1	0	9901	Q2KDV6	Q2KDV6{225-248}	0.0001	0.0002	0.0003	Q2KDV6		38.99		24.1773				76.9532
18629@20201019_1_3409_iTRAQ.cmpd.rclb.mgf	63.4	438.237	4	0	0.0066	0	2	DDIR	AAGHIVHTPDLFDGR	TFHS	MOD:01485 A1	0	4093	Q2K702	Q2K702{26-40}	0.0001	0.0002	0.0003	Q2K702		35.04						61.6117
37781@20201019_1_3409_iTRAQ.cmpd.rclb.mgf	120.37	729.165	5	0	0.0039	1	2	GNVK	VSDGTSDESKTNYGYTVGAGVEAFVTNNITTR	LEYR	MOD:01485 V1;MOD:01485 Y13	0	5698	Q2KA52	Q2KA52{143-174}	0.0001	0.0002	0.0003	Q2KA52		59.84						82.2674
14892@20201019_1_3409_iTRAQ.cmpd.rclb.mgf	52.28	750.879	2	0	0.0015	0	2		AEAAPLYDTYSR	APLR	MOD:01485 A1	0	7757	Q2KCV1	Q2KCV1{2-13}	0.0001	0.0002	0.0003	Q2KCV1		34.25		29.5836				122.057
22886@20201019_1_3409_iTRAQ.cmpd.rclb.mgf	75.92	490.518	4	0	0.003	0	2	AEER	GIHAFGQASDMIAAGPK	AQLT	MOD:01485 G1;MOD:01485 K17	0	10500	Q2K8G8	Q2K8G8{230-246}	0.0001	0.0002	0.0003	Q2K8G8		40.04						54.0922
4434@20201019_1_3409_iTRAQ.cmpd.rclb.mgf	21.4	459.937	3	0	0.0002	1	2		AQASGLMAGKR	GVIM	MOD:01485 A1;MOD:01485 K10	0	9571	Q2KBN7	Q2KBN7{2-12}	0.0001	0.0002	0.0003	Q2KBN7		25.64						49.344
36222@20201019_1_3409_iTRAQ.cmpd.rclb.mgf	115.8	654.866	4	0	-0.0054	0	2	SAGR	TAVGSFNGAFATVPAHELGAAVIK	GALA	MOD:01485 T1;MOD:01485 K24	0	8991	Q2K324	Q2K324{14-37}	0.0001	0.0002	0.0003	Q2K324		49.43						133.85
38933@20201019_1_3409_iTRAQ.cmpd.rclb.mgf	123.75	966.258	4	0	-0.0017	1	2	AMAK	LRPAFDKEGTVTAANASGLNDGAAAAVLMSEAEAVR	RGIQ	MOD:01485 L1;MOD:01485 K7	0	8991	Q2K324	Q2K324{232-267}	0.0001	0.0002	0.0003	Q2K324		32.96						75.4879
14291@20201019_1_3409_iTRAQ.cmpd.rclb.mgf	50.52	709.348	2	0	0.0018	0	2		TNASTESFFNR	SLAD	MOD:01485 T1	0	7228	Q2KA25	Q2KA25{2-12}	0.0001	0.0002	0.0003	Q2KA25		24.65		20.1272				96.5945
18398@20201019_1_3409_iTRAQ.cmpd.rclb.mgf	62.72	534.52	4	0	0.0021	0	2	VLVR	HDDGTVTVYGNADTLSVAR	GQKI	MOD:01485 H1	0	6910	Q2K964	Q2K964{469-487}	0.0001	0.0002	0.0003	Q2K964		61.62						59.8907
32638@20201019_1_3409_iTRAQ.cmpd.rclb.mgf	104.85	686.864	4	0	0.0013	0	2	VVAK	HIFDGSDIAANPANNTLVGTGPFK	FAEH	MOD:01485 H1;MOD:01485 K24	0	10010	Q2K249	Q2K249{180-203}	0.0001	0.0002	0.0003	Q2K249		71.46						105.161
20929@20201019_1_3409_iTRAQ.cmpd.rclb.mgf	70.15	566.034	4	0	0.0081	0	2	GVFK	IGTEGTYAPFTYHDESGK	LVGF	MOD:01485 I1;MOD:01485 K18	0	4137	Q2K336	Q2K336{38-55}	0.0001	0.0002	0.0003	Q2K336		61.59						83.8456
27817@20201019_1_3409_iTRAQ.cmpd.rclb.mgf	90.47	751.366	4	0	0.0043	0	2	DAAK	AMVDQGVDVLTQHTDTTAPMQVAEER	GIHA	MOD:01485 A1;MOD:00719 M20	0	10500	Q2K8G8	Q2K8G8{204-229}	0.0001	0.0002	0.0003	Q2K8G8		73.64						121.948
45919@20201019_1_3409_iTRAQ.cmpd.rclb.mgf	145.98	639.342	6	0	-0.0152	0	2	DGVK	FVIGHFNSGVSIPASEVYAENGILEITPAATNPK	FTER	MOD:01485 F1;MOD:01485 K34	0	3055	Q2K502	Q2K502{94-127}	0.0001	0.0002	0.0003	Q2K502		37.87		35.5713				63.7188
45882@20201019_1_3409_iTRAQ.cmpd.rclb.mgf	145.87	958.759	4	1	-0.0177	0	2	DGVK	FVIGHFNSGVSIPASEVYAENGILEITPAATNPK	FTER	MOD:01485 F1;MOD:01485 K34	0	3055	Q2K502	Q2K502{94-127}	0.0001	0.0002	0.0003	Q2K502		41.79						116.685
24120@20201019_1_3409_iTRAQ.cmpd.rclb.mgf	79.62	621.839	4	0	-0.0044	1	2		ADLSSLKDLGTSSEAAAPAHVR	KVDS	MOD:01485 A1;MOD:01485 K7	0	3545	Q2K9W4	Q2K9W4{2-23}	0.0001	0.0002	0.0003	Q2K9W4		27.38						80.5165
18373@20201019_1_3409_iTRAQ.cmpd.rclb.mgf	62.65	543.469	5	0	0.002	0	2	DKTK	VCFVYVGSHTDGGYSQAHDLGR	QQVQ	MOD:01214 C2;MOD:01485 V1;MOD:01485 Y5	0	10500	Q2K8G8	Q2K8G8{30-51}	0.0001	0.0002	0.0003	Q2K8G8		45.75						63.3852
60362@20201019_1_3409_iTRAQ.cmpd.rclb.mgf	196.38	941.268	4	0	-0.0139	1	2	DRRK	AMLEDIAILTGGTVISEDLGIKLESVTLDMLGR	AKKV	MOD:01485 A1;MOD:01485 K22	0	6161	Q2KBZ7	Q2KBZ7{287-319}	0.0001	0.0002	0.0003	Q2KBZ7		34.15		26.3264				81.0557
46195@20201019_1_3409_iTRAQ.cmpd.rclb.mgf	146.8	720.895	4	0	0.0019	0	2	NFGK	IATESGAELVGTDGFDQSIQLVLTK	RADA	MOD:01485 I1;MOD:01485 K25	0	4137	Q2K336	Q2K336{155-179}	0.0001	0.0002	0.0003	Q2K336		64.95						103.688
33665@20201019_1_3409_iTRAQ.cmpd.rclb.mgf	107.85	718.396	4	0	0.0003	0	2	GAKR	VIVSAPADGADLTVVYGVNHDQLTK	EHTV	MOD:01485 V1;MOD:01485 K25	0	9080	Q2K4I4	Q2K4I4{120-144}	0.0001	0.0002	0.0003	Q2K4I4		73.56						95.0896
24100@20201019_1_3409_iTRAQ.cmpd.rclb.mgf	79.55	772.898	4	0	0.0007	2	2	GAEK	FKAETGIAYRDFEPTGDTQGEQAIR	NFAS	MOD:01485 F1;MOD:01485 K2	0	2076	Q2KDS5	Q2KDS5{50-74}	0.0001	0.0002	0.0003	Q2KDS5		62.57						87.6614
15529@20201019_1_3409_iTRAQ.cmpd.rclb.mgf	54.22	523.545	4	0	0.0047	1	2	PSVK	SIIAGEQHSTIFKDTR	ELAK	MOD:01485 S1;MOD:01485 K13	0	5613	Q2K5F5	Q2K5F5{274-289}	0.0001	0.0002	0.0003	Q2K5F5		57.33						63.8114
17849@20201019_1_3409_iTRAQ.cmpd.rclb.mgf	61.1	762.355	3	1	-0.0142	0	2		TTYYVASSSSGGGNGSASSPFR	TISE	MOD:01485 T1	0	8866	Q2K908	Q2K908{2-23}	0.0001	0.0002	0.0003	Q2K908		30.54						90.9779
45586@20201019_1_3409_iTRAQ.cmpd.rclb.mgf	145	523.29	4	0	0.0014	0	2	DYPK	LAQLWWQAIGDASSGAK	TAQE	MOD:01485 L1;MOD:01485 K17	0	10603	Q2K1V1	Q2K1V1{478-494}	0.0001	0.0002	0.0003	Q2K1V1		60.81						68.478
29206@20201019_1_3409_iTRAQ.cmpd.rclb.mgf	94.8	514.523	4	0	0.0016	1	2	KSGK	AIGWEYDAMNEIAKR	LNFK	MOD:01485 A1;MOD:01485 K14	0	1188	Q2K378	Q2K378{55-69}	0.0001	0.0002	0.0003	Q2K378		35.03						40.9761
8325@20201019_1_3409_iTRAQ.cmpd.rclb.mgf	32.87	410.918	3	0	-0.001	0	2		SGSVSPLAPK	SFVP	MOD:01485 S1;MOD:01485 K10	0	7928	Q2K3R9	Q2K3R9{2-11}	0.0001	0.0002	0.0003	Q2K3R9		28.58						87.6431
20039@20201019_1_3409_iTRAQ.cmpd.rclb.mgf	67.52	405.991	4	0	0.0018	1	2	LNAR	RAAELIQADFAK	IGVK	MOD:01485 R1;MOD:01485 K12	0	474	Q2KC86	Q2KC86{386-397}	0.0001	0.0002	0.0003	Q2KC86		27.62						71.4077
10425@20201019_1_3409_iTRAQ.cmpd.rclb.mgf	39.18	501.517	4	0	0.0083	0	2	AAHR	AHASTEGLAHHLPAYAGR	TMQA	MOD:01485 A1	0	9884	Q2K4I1	Q2K4I1{172-189}	0.0001	0.0002	0.0003	Q2K4I1		37.08						81.9918
56066@20201019_1_3409_iTRAQ.cmpd.rclb.mgf	179.47	865.998	4	0	-0.0007	0	2	DFVR	QVLADASGKPVVATEAEEPVLLGAAILGAVAGR	QFAD	MOD:01485 Q1;MOD:01485 K9	0	2347	Q2K6L9	Q2K6L9{460-492}	0.0001	0.0002	0.0003	Q2K6L9		42.28						92.0531
32645@20201019_1_3409_iTRAQ.cmpd.rclb.mgf	104.87	740.415	4	0	0.003	0	2	FGGK	VLGVPVEIVDADHQNKPDIASNIAR	QWYD	MOD:01485 V1;MOD:01485 K16	0	8393	Q2K0R6	Q2K0R6{64-88}	0.0001	0.0002	0.0003	Q2K0R6		82.76						97.1702
57168@20201019_1_3409_iTRAQ.cmpd.rclb.mgf	183.47	995.756	4	0	0.0003	0	2	DAIR	ELMAAVDSYIPTPERPVDQPFLMPIEDVFSISGR	GTVV	MOD:01485 E1;MOD:00719 M3	0	9836	Q2K9N2	Q2K9N2{188-221}	0.0001	0.0002	0.0003	Q2K9L8;Q2K9N2		25.36						84.3863
703@20201019_1_3409_iTRAQ.cmpd.rclb.mgf	10.22	396.936	4	0	-0.0013	0	2	KKER	AESIEEMHHADR	LVAR	MOD:01485 A1;MOD:00719 M7	0	2845	Q2K2W2	Q2K2W2{54-65}	0.0001	0.0002	0.0003	Q2K2W2		29.23						46.5966
55774@20201019_1_3409_iTRAQ.cmpd.rclb.mgf	178.45	989.303	4	0	0.007	0	2	DGIR	FVVGPVTSGVAIPVSDVLAENGVLMVTPTATAPDLTK	RGLA	MOD:01485 F1;MOD:01485 K37	0	5167	Q2K5M7	Q2K5M7{93-129}	0.0001	0.0002	0.0003	Q2K5M7		69.59						126.258
60457@20201019_1_3409_iTRAQ.cmpd.rclb.mgf	201.82	701.396	4	0	-0.0057	1	2	LIAK	MKEAGVSIIYWGGLHTEAGLIIR	QAAD	MOD:01485 M1;MOD:01485 K2	0	3055	Q2K502	Q2K502{211-233}	0.0001	0.0002	0.0003	Q2K502		62.12						80.62
45197@20201019_1_3409_iTRAQ.cmpd.rclb.mgf	143.87	621.586	4	0	-0.0045	0	2	VKLR	YLASQGGLAAHELADALGYFK	DTGI	MOD:01485 Y1;MOD:01485 K21	0	6679	Q2K1L1	Q2K1L1{32-52}	0.0001	0.0002	0.0003	Q2K1L1		25.91						82.5817
33175@20201019_1_3409_iTRAQ.cmpd.rclb.mgf	106.42	592.094	4	0	-0.0025	0	2	FRKR	VAGAFLVAPPDVTNPDIRPK	HLMT	MOD:01485 V1;MOD:01485 K20	0	2586	Q2K7Y0	Q2K7Y0{87-106}	0.0001	0.0002	0.0003	Q2K7Y0		27.49						62.9019
19080@20201019_1_3409_iTRAQ.cmpd.rclb.mgf	64.72	442.001	4	0	0.0057	0	2	VIDR	AAPIPHLNVAACDK	IMDR	MOD:01214 C12;MOD:01485 A1;MOD:01485 K14	0	10076	Q2K3E5	Q2K3E5{439-452}	0.0001	0.0002	0.0003	Q2K3E5		31.81						57.8979
23885@20201019_1_3409_iTRAQ.cmpd.rclb.mgf	78.88	561.547	4	0	0.0017	1	2	KNEK	YVDGGVAAVASTDFRDSPK	GLFA	MOD:01485 Y1;MOD:01485 K19	0	4702	Q2KCC4	Q2KCC4{272-290}	0.0001	0.0002	0.0003	Q2KCC4		41.99						111.132
24150@20201019_1_3409_iTRAQ.cmpd.rclb.mgf	79.7	621.839	4	0	-0.0044	1	2		ADLSSLKDLGTSSEAAAPAHVR	KVDS	MOD:01485 A1;MOD:01485 K7	0	3545	Q2K9W4	Q2K9W4{2-23}	0.0001	0.0002	0.0003	Q2K9W4		36.04						58.4222
22605@20201019_1_3409_iTRAQ.cmpd.rclb.mgf	75.1	717.904	2	0	0.0037	0	2		SELTSLTIAEAR	EKLR	MOD:01485 S1	0	5776	Q2K939	Q2K939{2-13}	0.0001	0.0002	0.0003	Q2K939		49.79						129.432
43431@20201019_1_3409_iTRAQ.cmpd.rclb.mgf	138.53	770.397	4	0	0.003	0	2	QEVK	IGYDGIVFATDSSNPDVAYVPADIYK	ALAA	MOD:01485 Y3;MOD:01485 K26	0	7138	Q2KCV8	Q2KCV8{109-134}	0.0001	0.0002	0.0003	Q2KCV8		37.54						87.5867
27029@20201019_1_3409_iTRAQ.cmpd.rclb.mgf	88.17	650.68	3	0	0.0002	0	2		TSINTNNAAMAALQTLR	GINQ	MOD:01485 T1;MOD:00719 M10	0	5239	Q2KCF0	Q2KCF0{2-18}	0.0001	0.0002	0.0003	Q2KCF0		74.93						106.268
27106@20201019_1_3409_iTRAQ.cmpd.rclb.mgf	88.4	544.799	4	0	0.006	0	2	HRAR	GHNVFQPYQVNAALMAK	AGSD	MOD:01485 G1;MOD:01485 K17	0	5764	Q2KCV0	Q2KCV0{235-251}	0.0001	0.0002	0.0003	Q2KCV0		34.15						75.165
22798@20201019_1_3409_iTRAQ.cmpd.rclb.mgf	75.67	508.053	4	0	0.0004	0	2	TISK	NLNVQPTIQIRPGYK	FNVL	MOD:01485 N1;MOD:01485 K15	0	5305	Q2K2Q2	Q2K2Q2{401-415}	0.0001	0.0002	0.0003	Q2K2Q2		42.73						51.0691
59575@20201019_1_3409_iTRAQ.cmpd.rclb.mgf	192.77	735.389	4	0	-0.0014	0	2	IIQR	AASVEEIANLVTYLASPLASATTGASMR	VDGG	MOD:01485 A1	0	8138	Q2KBC9	Q2KBC9{227-254}	0.0001	0.0002	0.0003	Q2KBC9		75.47		26.2805				90.4272
55059@20201019_1_3409_iTRAQ.cmpd.rclb.mgf	176.28	749.41	4	0	0.0051	0	2	KNAR	ALAETLIAGGLDVVSGGTDNHLMLVDLR	KKNA	MOD:01485 A1	0	7228	Q2KA25	Q2KA25{302-329}	0.0001	0.0002	0.0003	Q2KA25		46.83						96.1382
24575@20201019_1_3409_iTRAQ.cmpd.rclb.mgf	80.95	656.015	3	0	0.0109	0	2		TSINTNNSAMAALQTLR	SINS	MOD:01485 T1;MOD:00719 M10	0	5239	Q2K133	Q2K133{2-18}	0.0001	0.0002	0.0003	Q2K133		36.76						85.2216
40105@20201019_1_3409_iTRAQ.cmpd.rclb.mgf	127.2	485.777	4	0	0.0014	0	2	GDLR	LSASGAFDTFNPLLAK	GQTA	MOD:01485 L1;MOD:01485 K16	0	9780	Q2KDT6	Q2KDT6{64-79}	0.0001	0.0002	0.0003	Q2KDT6		26.6						51.0762
36399@20201019_1_3409_iTRAQ.cmpd.rclb.mgf	116.32	600.085	4	0	0.0033	0	2	WWTR	ASLEGIAPIVAVPTTAGTGSEVGR	ASVI	MOD:01485 A1	0	8885	Q2K684	Q2K684{169-192}	0.0001	0.0002	0.0003	Q2K684		71.44						78.0438
25535@20201019_1_3409_iTRAQ.cmpd.rclb.mgf	83.78	659.329	4	0	0.0088	0	2	SGKK	LGVTSSTAQESYANHFYPDMK	KTVF	MOD:01485 L1;MOD:01485 K21	0	5072	Q2K1G2	Q2K1G2{148-168}	0.0001	0.0002	0.0003	Q2K1G2		31.84						80.9343
47658@20201019_1_3409_iTRAQ.cmpd.rclb.mgf	151.43	636.515	6	0	0.0099	1	2	FVAR	NAGNVVDTDVLGTIEYGAEHLHAPLIVVMGHKR	CGAV	MOD:01485 N1;MOD:01485 K32	0	6177	Q8KL91	Q8KL91{90-122}	0.0001	0.0002	0.0003	Q8KL91		47.23						29.3496
49864@20201019_1_3409_iTRAQ.cmpd.rclb.mgf	159.22	1193.13	4	0	0.0036	0	2	EQHR	AEIGVPVVTYESTASVVPADPQPAPGDELIGPVGAVETITPPETVR	TYIE	MOD:01485 A1	0	3301	Q2K5V7	Q2K5V7{99-144}	0.0001	0.0002	0.0003	Q2K5V7		26.58		30.8037				88.9456
42277@20201019_1_3409_iTRAQ.cmpd.rclb.mgf	134.87	839.926	4	0	0.0007	1	2	PQYK	FVMEGAADIAQETGLATGKYDIATGGYYR	APAR	MOD:01485 F1;MOD:01485 K19	0	6989	Q2K0L8	Q2K0L8{75-103}	0.0001	0.0002	0.0003	Q2K0L8		68.75						147.923
41375@20201019_1_3409_iTRAQ.cmpd.rclb.mgf	130.93	701.398	4	0	0.0027	1	2	LIAK	MKEAGVSIIYWGGLHTEAGLIIR	QAAD	MOD:01485 M1;MOD:01485 K2	0	3055	Q2K502	Q2K502{211-233}	0.0001	0.0002	0.0003	Q2K502		41.2						57.3169
15503@20201019_1_3409_iTRAQ.cmpd.rclb.mgf	54.13	542.285	4	0	0.0035	1	2	AAAK	MLAESNLSADQVDGSGKR	GQVL	MOD:01485 M1;MOD:01485 K17	0	8114	Q2K3F3	Q2K3F3{130-147}	0.0001	0.0002	0.0003	Q2K3F3		24.75						64.629
42990@20201019_1_3409_iTRAQ.cmpd.rclb.mgf	137.08	824.457	3	1	-0.0195	0	2	ADMK	NGGILGVANGVQEAAGALGWTVK	VLDG	MOD:01485 N1;MOD:01485 K23	0	4359	Q2K1J3	Q2K1J3{68-90}	0.0001	0.0002	0.0003	Q2K1J3		54.45						116.42
7034@20201019_1_3409_iTRAQ.cmpd.rclb.mgf	29.08	817.74	3	0	0.001	0	2		AVDATSSVTSSTSTSSSSSAQSK	ATLN	MOD:01485 A1;MOD:01485 K23	0	4239	Q2KCD6	Q2KCD6{2-24}	0.0001	0.0002	0.0003	Q2KCD6		106.83						115.262
28091@20201019_1_3409_iTRAQ.cmpd.rclb.mgf	91.28	903.47	2	0	0.0148	0	2		TSINTNNSAMAALQTLR	SINS		0	5239	Q2K133	Q2K133{2-18}	0.0001	0.0002	0.0003	Q2K133		44.02						74.7224
51059@20201019_1_3409_iTRAQ.cmpd.rclb.mgf	163.3	726.627	4	0	-0.0023	0	2	FLAK	EFNVSVQDVTAFVLGGHGDTMVPLAR	YSTV	MOD:01485 E1	0	1302	Q2K3E9	Q2K3E9{160-185}	0.0001	0.0002	0.0003	Q2K3E9		56.5		26.3498				81.7063
54038@20201019_1_3409_iTRAQ.cmpd.rclb.mgf	172.37	822.86	5	0	-0.016	1	2	DGIR	FVVGPVTSGVAIPVSDVLAENGVLMVTPTATAPDLTKR	GLAN	MOD:01485 F1;MOD:01485 K37	0	5167	Q2K5M7	Q2K5M7{93-130}	0.0001	0.0002	0.0003	Q2K5M7		26.65		30.2384				74.8075
16667@20201019_1_3409_iTRAQ.cmpd.rclb.mgf	57.65	547.796	4	0	0.0088	1	2	TDKK	EVVEAARTEHEATLAYVR	TPVG	MOD:01485 E1	0	3814	Q2K9C5	Q2K9C5{365-382}	0.0001	0.0002	0.0003	Q2K9C5		47.36						89.6173
20290@20201019_1_3409_iTRAQ.cmpd.rclb.mgf	68.25	535.824	2	0	0.0023	0	2	SELR	QQLVSLQK	GVTN	MOD:00040 Q1;MOD:01485 K8	0	3378	Q2K6N6	Q2K6N6{344-351}	0.0001	0.0002	0.0003	Q2K6N6		33.48						55.243
34198@20201019_1_3409_iTRAQ.cmpd.rclb.mgf	109.42	663.11	4	0	-0.0004	1	2	DQIK	NFGKEAEVSEVGQVLSVGDGIAR	VYGL	MOD:01485 N1;MOD:01485 K4	0	964	Q2K3G8	Q2K3G8{18-40}	0.0001	0.0002	0.0003	Q2K3G8		60.5						81.0146
30596@20201019_1_3409_iTRAQ.cmpd.rclb.mgf	98.87	612.336	4	0	0.0027	0	2	AGLK	ETTTGDTLCDPLKPVILER	MEFP	MOD:01214 C9;MOD:01485 E1;MOD:01485 K13	0	7107	Q2K9L9	Q2K9L9{387-405}	0.0001	0.0002	0.0003	Q2K9L9		32.71						74.717
24980@20201019_1_3409_iTRAQ.cmpd.rclb.mgf	82.15	537.551	4	0	0.0017	1	2	FLPK	GQLGALDENPYKLDVAR	AKEL	MOD:01485 G1;MOD:01485 K12	0	3376	Q2K350	Q2K350{352-368}	0.0001	0.0002	0.0003	Q2K350		60.77						65.7369
44190@20201019_1_3409_iTRAQ.cmpd.rclb.mgf	140.77	953.492	4	0	0.0002	0	2	ELKK	DGNLTVQEQAGLNVGFLAYNTQMAPFDKPEVR	RALN	MOD:01485 D1;MOD:01485 K28	0	474	Q2KC86	Q2KC86{275-306}	0.0001	0.0002	0.0003	Q2KC86		55.04						96.037
25366@20201019_1_3409_iTRAQ.cmpd.rclb.mgf	83.28	549.568	4	0	0.0005	1	2	LLGR	VVDALGNPIDGKGPINATR	RSRV	MOD:01485 V1;MOD:01485 K12	0	964	Q2K3G8	Q2K3G8{107-125}	0.0001	0.0002	0.0003	Q2K3G8		43.07						96.582
32854@20201019_1_3409_iTRAQ.cmpd.rclb.mgf	105.48	761.373	4	0	0.0046	0	2	VEFK	HGGTEIEPGLADSWSVSADGTEYTFK	LHPG	MOD:01485 H1;MOD:01485 K26	0	474	Q2KC86	Q2KC86{64-89}	0.0001	0.0002	0.0003	Q2KC86		83.14						77.4297
46854@20201019_1_3409_iTRAQ.cmpd.rclb.mgf	149.07	705.614	4	0	-0.0051	1	2	KSPR	DLDGKTYGGFGGTWESALVSAMIR	NDGG	MOD:01485 D1;MOD:01485 K5	0	9495	Q2K3H4	Q2K3H4{130-153}	0.0001	0.0002	0.0003	Q2K3H4		30.71						93.3597
14761@20201019_1_3409_iTRAQ.cmpd.rclb.mgf	51.9	539.98	3	0	-0.0042	1	2		TKLSYQLYSAR	NFQP	MOD:01485 T1;MOD:01485 K2	0	1401	Q2K7F3	Q2K7F3{2-12}	0.0001	0.0002	0.0003	Q2K7F3		29.15						68.5161
24844@20201019_1_3409_iTRAQ.cmpd.rclb.mgf	81.75	649.86	2	0	-0.0001	0	2	IRLK	QSGPDAILTAAK	FIQH	MOD:00040 Q1;MOD:01485 K12	0	2517	Q2K699	Q2K699{223-234}	0.0001	0.0002	0.0003	Q2K699		29.27		19.277				70.8897
22195@20201019_1_3409_iTRAQ.cmpd.rclb.mgf	73.9	427.484	4	1	0.0015	0	2	GAAK	AAGSVDPEAVATAMK	EKGP	MOD:01485 A1;MOD:01485 K15	0	3055	Q2K502	Q2K502{314-328}	0.0001	0.0002	0.0003	Q2K502		44.35						50.156
40912@20201019_1_3409_iTRAQ.cmpd.rclb.mgf	129.57	834.431	3	0	0.0044	0	2	QTLK	TANPSVPVMTLDADLAAEDSALR	KTYL	MOD:01485 T1	0	321	Q2K5C9	Q2K5C9{106-128}	0.0001	0.0002	0.0003	Q2K5C9		29.88						64.8469
59813@20201019_1_3409_iTRAQ.cmpd.rclb.mgf	193.53	600.598	4	0	-0.0068	0	2	WKGR	WGAAPAGADFQAIVAALLQLK	GEDA	MOD:01485 W1;MOD:01485 K21	0	2055	Q2K2Y6	Q2K2Y6{164-184}	0.0001	0.0002	0.0003	Q2K2Y6		47.6						79.7207
35605@20201019_1_3409_iTRAQ.cmpd.rclb.mgf	113.97	689.885	4	0	0.0011	0	2	SSLK	GVGYGTAAQPLPIVTGQDAEIPSVK	SIIA	MOD:01485 G1;MOD:01485 K25	0	5613	Q2K5F5	Q2K5F5{249-273}	0.0001	0.0002	0.0003	Q2K5F5		118.43						91.9675
35738@20201019_1_3409_iTRAQ.cmpd.rclb.mgf	114.38	670.899	4	0	-0.0067	0	2	VETR	GNVGLVTLNRPQALNALNSTVLK	ELKA	MOD:01485 G1;MOD:01485 K23	0	2134	Q2KDA8	Q2KDA8{12-34}	0.0001	0.0002	0.0003	Q2KDA8		42.67						82.3017
41145@20201019_1_3409_iTRAQ.cmpd.rclb.mgf	130.25	788.423	4	0	-0.0041	0	2	ADGK	MAQLNQQPLGTGPFTFVAYQPDAVIR	YKAN	MOD:01485 M1;MOD:01485 Y19	0	474	Q2KC86	Q2KC86{196-221}	0.0001	0.0002	0.0003	Q2KC86		27.04						65.4495
16676@20201019_1_3409_iTRAQ.cmpd.rclb.mgf	57.68	719.88	2	0	-0.0024	0	2		SSEIDSSTLLSR	ASQL	MOD:01485 S1	0	5998	Q2KBY4	Q2KBY4{2-13}	0.0001	0.0002	0.0003	Q2KBY4		61.11		22.0931				146.061
41486@20201019_1_3409_iTRAQ.cmpd.rclb.mgf	131.27	538.555	4	0	0.0001	1	2	FKGK	EKIDDLVFAITSDAAVR	AQKL	MOD:01485 E1;MOD:01485 K2	0	474	Q2KC86	Q2KC86{233-249}	0.0001	0.0002	0.0003	Q2KC86		51.16						67.0122
56190@20201019_1_3409_iTRAQ.cmpd.rclb.mgf	179.93	995.761	4	0	0.0207	0	2	DAIR	ELMAAVDSYIPTPERPVDQPFLMPIEDVFSISGR	GTVV	MOD:01485 E1;MOD:00719 M3	0	9836	Q2K9N2	Q2K9N2{188-221}	0.0001	0.0002	0.0003	Q2K9L8;Q2K9N2		35.14						86.0315
40551@20201019_1_3409_iTRAQ.cmpd.rclb.mgf	128.5	897.682	4	0	-0.0008	1	2	AIKK	AAGADGENYDEVRYEGYGPGGTAIIVEALTDNR	NRTA	MOD:01485 A1	0	5483	Q2K4K5	Q2K4K5{73-105}	0.0001	0.0002	0.0003	Q2K4K5		37.64						120.441
35479@20201019_1_3409_iTRAQ.cmpd.rclb.mgf	113.38	792.137	4	0	0.0077	0	2	KISR	FHYSDYGIPDEQTTVIVSSDAYLSASR	EHAR	MOD:01485 F1	0	9495	Q2K3H4	Q2K3H4{203-229}	0.0001	0.0002	0.0003	Q2K3H4		64.68						90.8975
46627@20201019_1_3409_iTRAQ.cmpd.rclb.mgf	148.4	929.213	4	0	0.001	0	2	NIVK	QLQAAGYGTDLQYGDDDIPNQLSQIENMVTK	GVKV	MOD:01485 Q1;MOD:01485 K31	0	5613	Q2K5F5	Q2K5F5{52-82}	0.0001	0.0002	0.0003	Q2K5F5		72.92						111.173
22307@20201019_1_3409_iTRAQ.cmpd.rclb.mgf	74.22	653.089	4	0	0.0045	0	2	FLTK	QVDANNGAVTDVQGTYGTFHVK	ADGS	MOD:01485 Q1;MOD:01485 K22	0	201	Q2K1Q3	Q2K1Q3{162-183}	0.0001	0.0002	0.0003	Q2K1Q3		78.8						80.701
41490@20201019_1_3409_iTRAQ.cmpd.rclb.mgf	131.27	599.11	5	0	-0.0025	1	2	AAPK	GASDDAVLKLFEPGSYELVPHDGMR	KTIA	MOD:01485 G1;MOD:01485 K9	0	4223	Q2K8W5	Q2K8W5{205-229}	0.0001	0.0002	0.0003	Q2K8W5		33.5						68.5968
39395@20201019_1_3409_iTRAQ.cmpd.rclb.mgf	125.12	643.33	4	0	0.0024	0	2	NIEK	GFDASLAGTGSSDLPDIPAEFSK	TPFV	MOD:01485 G1;MOD:01485 K23	0	7659	Q2K8D8	Q2K8D8{91-113}	0.0001	0.0002	0.0003	Q2K8D8		44.86						96.6257
34438@20201019_1_3409_iTRAQ.cmpd.rclb.mgf	110.12	628.569	4	0	0.0022	0	2	LDSK	TAHWETEEANTVMTNFLTK	YKDI	MOD:01485 T1;MOD:01485 K19	0	3790	Q2KCK8	Q2KCK8{214-232}	0.0001	0.0002	0.0003	Q2KCK8		25.87						56.9116
11283@20201019_1_3409_iTRAQ.cmpd.rclb.mgf	41.73	582.849	2	1	-0.0053	0	2	WQAR	TSLADGIAK	AYAD	MOD:01485 T1;MOD:01485 K9	0	2876	Q2KC59	Q2KC59{291-299}	0.0001	0.0002	0.0003	Q2KC59		31.23		27.6013				115.718
31390@20201019_1_3409_iTRAQ.cmpd.rclb.mgf	101.18	799.882	4	0	0.0022	1	2	VFEK	LDEVNAAYDAGRCDVYTTDQSGLYSLR	LTLK	MOD:01214 C13;MOD:01485 L1	0	6573	Q2K902	Q2K902{186-212}	0.0001	0.0002	0.0003	Q2K902		76.72						107.927
31732@20201019_1_3409_iTRAQ.cmpd.rclb.mgf	102.2	569.295	4	0	0.0084	0	2	NPIK	ISLEGFTGAYDGEPVSESK	LADT	MOD:01485 I1;MOD:01485 K19	0	6893	Q2K8F2	Q2K8F2{166-184}	0.0001	0.0002	0.0003	Q2K8F2		59.32						72.1243
40563@20201019_1_3409_iTRAQ.cmpd.rclb.mgf	128.55	639.862	4	0	0.0001	0	2	VVPK	TGVVAGVYVQAISAFAPHPNAAK	LWME	MOD:01485 T1;MOD:01485 K23	0	2394	Q2K678	Q2K678{266-288}	0.0001	0.0002	0.0003	Q2K678		66.96						122.034
38755@20201019_1_3409_iTRAQ.cmpd.rclb.mgf	123.23	525.317	4	1	-0.016	0	2	VSVK	SIPQVANGLGITILSTPK	GVMA	MOD:01485 S1;MOD:01485 K18	0	1036	Q2K9K2	Q2K9K2{93-110}	0.0001	0.0002	0.0003	Q2K9K2		42.39						71.4082
3674@20201019_1_3409_iTRAQ.cmpd.rclb.mgf	19.18	401.227	3	0	0.0007	1	2	TIAR	RQPMAADLR	EIMG	MOD:01485 R1	0	4334	Q2KCV4	Q2KCV4{75-83}	0.0001	0.0002	0.0003	Q2KCV4		28.18						63.9634
56122@20201019_1_3409_iTRAQ.cmpd.rclb.mgf	179.7	694.105	4	0	0.014	0	2	QVRR	NTELFQQAMQMFSPFMAPPAAK	ESRK	MOD:01485 N1;MOD:01485 K22	0	9443	Q2K325	Q2K325{143-164}	0.0001	0.0002	0.0003	Q2K325		34.47						72.9901
59156@20201019_1_3409_iTRAQ.cmpd.rclb.mgf	191.3	859.228	4	0	0.005	1	2	ESSK	LSALQTQQQLAVQSLSIANSSSQTILSLFRG		MOD:01485 L1	0	5239	Q2KCF0	Q2KCF0{272-302}	0.0001	0.0002	0.0003	Q2KCF0		50.23						106.461
38657@20201019_1_3409_iTRAQ.cmpd.rclb.mgf	122.93	769.127	4	0	0.0039	1	2	MGTK	DLWEAATMGYQNIGPNYWKGEEGR	EALI	MOD:01485 D1;MOD:01485 K19	0	8161	Q2K670	Q2K670{186-209}	0.0001	0.0002	0.0003	Q2K670		47.92						85.0515
57711@20201019_1_3409_iTRAQ.cmpd.rclb.mgf	185.77	995.757	4	0	0.0061	0	2	DAIR	ELMAAVDSYIPTPERPVDQPFLMPIEDVFSISGR	GTVV	MOD:01485 E1;MOD:00719 M23	0	9836	Q2K9N2	Q2K9N2{188-221}	0.0001	0.0002	0.0003	Q2K9L8;Q2K9N2		28.63						85.4192
59572@20201019_1_3409_iTRAQ.cmpd.rclb.mgf	192.77	714.118	4	0	-0.0007	0	2	DFVR	FDIQPDVEPTGFPQLAFDNFTVLV		MOD:01485 F1	0	6636	Q2K890	Q2K890{250-273}	0.0001	0.0002	0.0003	Q2K890		30.21		24.0226				52.6832
52938@20201019_1_3409_iTRAQ.cmpd.rclb.mgf	169.12	953.893	5	0	0.0149	0	2	AASR	TATAVVSNTPILGPQSVASAQQAIMQYQQIAAAGGWPEVNPGDQR	LQLG	MOD:01485 T1	0	6383	Q2KA26	Q2KA26{61-105}	0.0001	0.0002	0.0003	Q2KA26		30.42						52.275
12614@20201019_1_3409_iTRAQ.cmpd.rclb.mgf	45.63	410.213	4	0	0.0043	0	2	TGVK	FHDGEAFDAAAAK	FALD	MOD:01485 F1;MOD:01485 K13	0	3873	Q2KDP1	Q2KDP1{110-122}	0.0001	0.0002	0.0003	Q2KDP1		38.29						44.1293
34005@20201019_1_3409_iTRAQ.cmpd.rclb.mgf	108.85	555.302	5	0	0.0057	0	2		AEILLFHHAQGLTPGVHAFADDIR	AAGH	MOD:01485 A1	0	4093	Q2K702	Q2K702{2-25}	0.0001	0.0002	0.0003	Q2K702		35.84						78.0231
14467@20201019_1_3409_iTRAQ.cmpd.rclb.mgf	51.05	593.578	4	0	0.0026	0	2	IAAK	HYYRPIKPEAADPADIAR	FPKL	MOD:01485 Y3;MOD:01485 K7	0	5704	Q2K0P9	Q2K0P9{287-304}	0.0001	0.0002	0.0003	Q2K0P9		27.13						60.6668
47532@20201019_1_3409_iTRAQ.cmpd.rclb.mgf	151.05	1148.3	4	0	0.002	0	2	GSDR	HTYGFGGQVFTGYNWQAGQIVYGVESDLGYSGDDVSSGGVK	NKYG	MOD:01485 Y3;MOD:01485 K41	0	5698	Q2KA52	Q2KA52{68-108}	0.0001	0.0002	0.0003	Q2KA52		28.74						88.5171
7816@20201019_1_3409_iTRAQ.cmpd.rclb.mgf	31.38	409.226	4	0	-0.0031	1	2	QLGK	DAVGDAAASGDLRK	NAVV	MOD:01485 D1;MOD:01485 K14	0	4462	Q2KE13	Q2KE13{445-458}	0.0001	0.0002	0.0003	Q2KE13		30.03						54.7563
39392@20201019_1_3409_iTRAQ.cmpd.rclb.mgf	125.1	622.33	4	0	0.0078	0	2	LGRR	HLMVNIPAAYVEAVEDGSVATR	HTAV	MOD:01485 H1	0	6383	Q2KA26	Q2KA26{198-219}	0.0001	0.0002	0.0003	Q2KA26		88.15						72.9136
41065@20201019_1_3409_iTRAQ.cmpd.rclb.mgf	130.03	538.308	4	0	-0.0191	0	2	SEPK	NLNPAIVASNGVFFIASK	VIEP	MOD:01485 N1;MOD:01485 K18	0	10010	Q2K249	Q2K249{49-66}	0.0001	0.0002	0.0003	Q2K249		69.67		30.2299				66.4111
53755@20201019_1_3409_iTRAQ.cmpd.rclb.mgf	171.53	519.295	4	0	-0.0007	0	2	NPEK	MIADLEDVFILLHEK	KLSN	MOD:01485 M1;MOD:01485 K15	0	6161	Q2KBZ7	Q2KBZ7{211-225}	0.0001	0.0002	0.0003	Q2KBZ7		58.67						62.8993
44100@20201019_1_3409_iTRAQ.cmpd.rclb.mgf	140.5	1241.63	2	0	-0.0008	0	2	AEMK	AECSFVSTDWDGIIPALNAK	KFDM	MOD:01214 C3;MOD:01485 A1;MOD:01485 K20	0	3015	Q2K7J0	Q2K7J0{67-86}	0.0001	0.0002	0.0003	Q2K7J0		59.57						127.328
34424@20201019_1_3409_iTRAQ.cmpd.rclb.mgf	110.08	478.02	4	0	0.0041	1	2	YMTK	GREPDFLLGLTSGMK	QIGQ	MOD:01485 G1;MOD:01485 K15	0	1196	Q2K6T2	Q2K6T2{77-91}	0.0001	0.0002	0.0003	Q2K6T2		25.15						37.5586
11715@20201019_1_3409_iTRAQ.cmpd.rclb.mgf	43	429.999	4	0	0.0012	1	2	VLQK	AHDAGIKVIAYDR	LIRD	MOD:01485 A1;MOD:01485 K7	0	5613	Q2K5F5	Q2K5F5{104-116}	0.0001	0.0002	0.0003	Q2K5F5		51.2						58.0345
54876@20201019_1_3409_iTRAQ.cmpd.rclb.mgf	175.72	906.47	4	1	0.0171	0	2	RLIR	DSANVDYYATFDNFQVGVLQANSIVDGLGLK	DGKG	MOD:01485 D1;MOD:01485 K31	0	5613	Q2K5F5	Q2K5F5{120-150}	0.0001	0.0002	0.0003	Q2K5F5		28.71						77.2065
55994@20201019_1_3409_iTRAQ.cmpd.rclb.mgf	179.22	865.998	4	0	-0.0007	0	2	DFVR	QVLADASGKPVVATEAEEPVLLGAAILGAVAGR	QFAD	MOD:01485 Q1;MOD:01485 K9	0	2347	Q2K6L9	Q2K6L9{460-492}	0.0001	0.0002	0.0003	Q2K6L9		27.4						99.494
21451@20201019_1_3409_iTRAQ.cmpd.rclb.mgf	71.73	505.288	4	0	0.0093	1	2	AGMK	AGDVVTALNGETIKDAR	DLSR	MOD:01485 A1;MOD:01485 K14	0	5777	Q2KAN8	Q2KAN8{362-378}	0.0001	0.0002	0.0003	Q2KAN8		39.62						51.8806
50416@20201019_1_3409_iTRAQ.cmpd.rclb.mgf	161.18	695.142	4	0	0.001	0	2	KSVK	EGVIGATSQQYPLLMASLGIEAIK	KFAD	MOD:01485 E1;MOD:01485 K24	0	5517	Q2KD00	Q2KD00{269-292}	0.0001	0.0002	0.0003	Q2KD00		80.86						105.782
32998@20201019_1_3409_iTRAQ.cmpd.rclb.mgf	105.9	665.603	4	0	0.0025	1	2	EALR	EGRIPIYEPGLDQLVAENTSTGR	LSFS	MOD:01485 E1	0	559	Q2K584	Q2K584{37-59}	0.0001	0.0002	0.0003	Q2K584		48.9						82.3855
55487@20201019_1_3409_iTRAQ.cmpd.rclb.mgf	177.6	519.302	4	0	0.0083	0	2	SSGR	VDAVIDDVVVLSEWVK	SDAG	MOD:01485 V1;MOD:01485 K16	0	3015	Q2K7J0	Q2K7J0{176-191}	0.0001	0.0002	0.0003	Q2K7J0		64.81						57.6279
15081@20201019_1_3409_iTRAQ.cmpd.rclb.mgf	52.85	571.303	3	0	0.0151	0	2	EVGR	GTFTQIGSTDQVASR	MSEL	MOD:01485 G1	0	7061	Q2K5W9	Q2K5W9{491-505}	0.0001	0.0002	0.0003	Q2K5W9		28.3						75.853
28643@20201019_1_3409_iTRAQ.cmpd.rclb.mgf	92.95	405.244	4	0	0.0017	0	2	SDNK	ALSAVSDALGVGAAK	VDTA	MOD:01485 A1;MOD:01485 K15	0	5239	Q2KCF1	Q2KCF1{59-73}	0.0001	0.0002	0.0003	Q2KCF1		58.71						58.8105
36332@20201019_1_3409_iTRAQ.cmpd.rclb.mgf	116.13	516.071	4	0	0.0005	0	2	GPDR	IAIPALLATAAVHHHLIR	KGLR	MOD:01485 I1	0	7802	Q2K4B4	Q2K4B4{669-686}	0.0001	0.0002	0.0003	Q2K4B4		37.92						50.1756
56816@20201019_1_3409_iTRAQ.cmpd.rclb.mgf	182.15	1046.31	4	0	-0.0014	0	2	GGQK	IGIVGAVTNDTPELSSPGPNVTIEDDVQTITSAVQDLK	GQGV	MOD:01485 I1;MOD:01485 K38	0	8753	Q2K4C5	Q2K4C5{173-210}	0.0001	0.0002	0.0003	Q2K4C5		46.48						105.177
59023@20201019_1_3409_iTRAQ.cmpd.rclb.mgf	190.88	1106.54	3	0	0.02	0	2	QIVK	DGGVPWCIGLGSGGATGWPATDWVEDIMLR	MQPP	MOD:01214 C7;MOD:01485 D1	0	4702	Q2KCC4	Q2KCC4{205-234}	0.0001	0.0002	0.0003	Q2KCC4		77.19						122.271
18361@20201019_1_3409_iTRAQ.cmpd.rclb.mgf	62.62	424.246	3	0	-0.0067	0	2	AFAK	SQLGAGVELPR	DGTV	MOD:01485 S1	0	1215	Q2K603	Q2K603{1021-1031}	0.0001	0.0002	0.0003	Q2K603		39.29						70.3591
36797@20201019_1_3409_iTRAQ.cmpd.rclb.mgf	117.5	819.629	4	0	0.0081	0	2	AWSK	TLVYCSEGSPEGFDPSLYTSGTTFDASSR	TVYS	MOD:01214 C5;MOD:01485 T1	0	474	Q2KC86	Q2KC86{25-53}	0.0001	0.0002	0.0003	Q2KC86		34.22						74.6868
8398@20201019_1_3409_iTRAQ.cmpd.rclb.mgf	33.08	553.302	3	0	-0.0041	1	2		AANRAPENPYLAAR	QEWS	MOD:01485 A1	0	6613	Q2K2Q8	Q2K2Q8{2-15}	0.0001	0.0002	0.0003	Q2K2Q8		28.24		22.4118				69.5026
12890@20201019_1_3409_iTRAQ.cmpd.rclb.mgf	46.43	469.257	4	0	0.0096	0	2	FSMR	QLLEAGVHFGHQTHR	WNPK	MOD:01485 Q1	0	1982	Q2K8Y7	Q2K8Y7{10-24}	0.0001	0.0002	0.0003	Q2K8Y7		90.49						82.2409
54434@20201019_1_3409_iTRAQ.cmpd.rclb.mgf	173.53	849.195	4	0	0.006	0	2	GGNK	VSEMSLTIYGDTIADGQHISLAALGAVDFVR	FDIQ	MOD:01485 V1	0	6636	Q2K890	Q2K890{219-249}	0.0001	0.0002	0.0003	Q2K890		52.55						84.9944
54854@20201019_1_3409_iTRAQ.cmpd.rclb.mgf	175.67	692.176	5	0	0.0046	0	2	KKAR	DAGVLVIALDTPLEPADAADATFATDNLLAGK	LIGQ	MOD:01485 D1;MOD:01485 K32	0	5517	Q2KD00	Q2KD00{106-137}	0.0001	0.0002	0.0003	Q2KD00		26.53						75.6662
22014@20201019_1_3409_iTRAQ.cmpd.rclb.mgf	73.37	909.931	2	1	-0.0114	0	2	RVEK	ASDNAAYWSIATTMR	SDNK	MOD:01485 A1;MOD:00719 M14	0	5239	Q2KCE9;Q2KCF1	Q2KCE9{40-54};Q2KCF1{40-54}	0.0001	0.0002	0.0003	Q2KCE9;Q2KCF1		68.23						97.6605
52217@20201019_1_3409_iTRAQ.cmpd.rclb.mgf	166.68	1184.91	3	0	0.0067	0	2	NIVK	QLQAAGYGTDLQYGDDDIPNQLSQIENMVTK	GVKV	MOD:00040 Q1;MOD:01485 K31	0	5613	Q2K5F5	Q2K5F5{52-82}	0.0001	0.0002	0.0003	Q2K5F5		31.54						89.538
37431@20201019_1_3409_iTRAQ.cmpd.rclb.mgf	119.35	864.943	4	0	0.0094	1	2	GIYK	FATAWQEQNPDYKIEITASSAGIPYPDR	LKEV	MOD:01485 F1;MOD:01485 K13	0	6989	Q2K0L8	Q2K0L8{156-183}	0.0001	0.0002	0.0003	Q2K0L8		75.46						111.199
28707@20201019_1_3409_iTRAQ.cmpd.rclb.mgf	93.2	975.514	2	0	-0.0028	0	2		TSINTNNAAMAALQTLR	GINQ	MOD:01485 T1;MOD:00719 M10	0	5239	Q2KCF0	Q2KCF0{2-18}	0.0001	0.0002	0.0003	Q2KCF0		85.8						149.818
35625@20201019_1_3409_iTRAQ.cmpd.rclb.mgf	114.05	682.028	3	0	0.0034	0	2	EQAR	ANAAAADLAPLSADVMAATR	VIYE	MOD:01485 A1	0	10547	Q2K9U1	Q2K9U1{294-313}	0.0001	0.0002	0.0003	Q2K9U1		76.11						139.712
13663@20201019_1_3409_iTRAQ.cmpd.rclb.mgf	48.7	394.739	4	0	0.0026	0	2	MALR	NIAIIAHVDHGK	TTLV	MOD:01485 N1;MOD:01485 K12	0	8018	Q2K3C5	Q2K3C5{5-16}	0.0001	0.0002	0.0003	Q2K3C5		30.12						52.3011
32388@20201019_1_3409_iTRAQ.cmpd.rclb.mgf	104.12	604.311	4	0	0.0034	0	2	VFIK	GSSSDPNADFLFSGQQEVLK	AAID	MOD:01485 G1;MOD:01485 K20	0	10540	Q2K5E8	Q2K5E8{153-172}	0.0001	0.0002	0.0003	Q2K5E8		76.57						73.3342
53054@20201019_1_3409_iTRAQ.cmpd.rclb.mgf	169.47	867.929	4	0	0.0046	0	2	AGFR	AGLFYSWWDDGLSGETDDIGSIVTLHNSIR	YQYE	MOD:01485 A1	0	6045	Q2K7H2	Q2K7H2{137-166}	0.0001	0.0002	0.0003	Q2K7H2		57.86						58.4144
18301@20201019_1_3409_iTRAQ.cmpd.rclb.mgf	62.43	450.503	4	0	0.0015	0	2	TGIK	VTHDLIGEGDVVEK	LQTQ	MOD:01485 V1;MOD:01485 K14	0	10603	Q2K1V1	Q2K1V1{94-107}	0.0001	0.0002	0.0003	Q2K1V1		49.85						39.3228
44525@20201019_1_3409_iTRAQ.cmpd.rclb.mgf	141.77	633.845	4	0	0.0022	0	2	IFKK	AEQLALDESAALPIYYYVSK	NVVS	MOD:01485 A1;MOD:01485 K20	0	2364	Q2K5M4	Q2K5M4{480-499}	0.0001	0.0002	0.0003	Q2K5M4		35.29						69.1134
55750@20201019_1_3409_iTRAQ.cmpd.rclb.mgf	178.4	659.871	6	0	0.006	0	2	DGIR	FVVGPVTSGVAIPVSDVLAENGVLMVTPTATAPDLTK	RGLA	MOD:01485 F1;MOD:01485 K37	0	5167	Q2K5M7	Q2K5M7{93-129}	0.0001	0.0002	0.0003	Q2K5M7		52.69						79.2248
40953@20201019_1_3409_iTRAQ.cmpd.rclb.mgf	129.7	685.369	4	0	0.0196	0	2	LEDR	VINTSDQVVPTFLMYHMNVGGK	WLDD	MOD:01485 V1;MOD:01485 K22	0	9462	Q2K687	Q2K687{137-158}	0.0001	0.0002	0.0003	Q2K687		48.44						78.8899
58056@20201019_1_3409_iTRAQ.cmpd.rclb.mgf	187.35	916.716	4	0	0.0064	0	2	PSGR	VIETDEDFVSELLESEGVAVVHGSAFGLGPNFR	ISYA	MOD:01485 V1	0	3230	Q2K5X1	Q2K5X1{343-375}	0.0001	0.0002	0.0003	Q2K5X1		54.48						115.483
29866@20201019_1_3409_iTRAQ.cmpd.rclb.mgf	96.73	528.05	4	0	-0.0011	0	2	DGPR	AHFVSNIDGAHIADILK	LVQP	MOD:01485 A1;MOD:01485 K17	0	1124	Q2KCY8	Q2KCY8{170-186}	0.0001	0.0002	0.0003	Q2KCY8		68.56						79.6411
1376@20201019_1_3409_iTRAQ.cmpd.rclb.mgf	12.35	576.331	2	0	-0.0042	0	2		TDQSATIK	IGDK	MOD:01485 T1;MOD:01485 K8	0	1465	Q2K8X4	Q2K8X4{2-9}	0.0001	0.0002	0.0003	Q2K8X4		55.92						104.118
12989@20201019_1_3409_iTRAQ.cmpd.rclb.mgf	46.72	515.025	4	0	0.0014	1	2	NFAK	FEDHVDGGVRDAAPGVK	AAAE	MOD:01485 F1;MOD:01485 K17	0	7556	Q2KE66	Q2KE66{516-532}	0.0001	0.0002	0.0003	Q2KE66		38.17						66.1425
21744@20201019_1_3409_iTRAQ.cmpd.rclb.mgf	72.57	803.435	2	0	0.001	0	2		SANILTVDDSASIR	LTTK	MOD:01485 S1	0	8164	Q2K4F7	Q2K4F7{2-15}	0.0001	0.0002	0.0003	Q2K4F7		30.09		22.5801				90.5182
46276@20201019_1_3409_iTRAQ.cmpd.rclb.mgf	147.03	562.847	4	0	-0.0075	1	2	SAAR	AKGITSILNLAPLIPDAPR	LGRL	MOD:01485 A1;MOD:01485 K2	0	3764	Q2KD55	Q2KD55{165-183}	0.0001	0.0002	0.0003	Q2KD55		30.15						54.9843
33752@20201019_1_3409_iTRAQ.cmpd.rclb.mgf	108.1	718.396	4	0	0.0003	0	2	GAKR	VIVSAPADGADLTVVYGVNHDQLTK	EHTV	MOD:01485 V1;MOD:01485 K25	0	9080	Q2K4I4	Q2K4I4{120-144}	0.0001	0.0002	0.0003	Q2K4I4		73.33						90.4555
32637@20201019_1_3409_iTRAQ.cmpd.rclb.mgf	104.85	682.347	4	0	0.003	0	2	PSGK	AHNEMLLPDEATDEAVANAIDAK	GRQL	MOD:01485 A1;MOD:01485 K23	0	8302	Q2K6H7	Q2K6H7{558-580}	0.0001	0.0002	0.0003	Q2K6H7		39.09						80.084
38934@20201019_1_3409_iTRAQ.cmpd.rclb.mgf	123.75	1128.57	2	0	-0.0019	0	2	WLNK	QYSVWGQVIEGMDNVDK	IKRG	MOD:01485 Q1;MOD:01485 K17	0	2976	Q2K8D7	Q2K8D7{131-147}	0.0001	0.0002	0.0003	Q2K8D7		40.81						106.161
47944@20201019_1_3409_iTRAQ.cmpd.rclb.mgf	152.27	866.189	4	0	0.0074	1	2		ARQEANEQFQITSFLDGANAAYIEQLYAR	YEED	MOD:01485 A1	0	2989	Q2K3F2	Q2K3F2{2-30}	0.0001	0.0002	0.0003	Q2K3F2		39.51						79.6197
32613@20201019_1_3409_iTRAQ.cmpd.rclb.mgf	104.77	686.865	4	0	0.002	0	2	VVAK	HIFDGSDIAANPANNTLVGTGPFK	FAEH	MOD:01485 H1;MOD:01485 K24	0	10010	Q2K249	Q2K249{180-203}	0.0001	0.0002	0.0003	Q2K249		46.63						92.1387
58412@20201019_1_3409_iTRAQ.cmpd.rclb.mgf	188.95	1221.14	4	0	-0.0046	1	2	GVGR	LVDADMEEESSKLSALQTQQQLAIQSLSIANSSSQNILSLFR	G	MOD:01485 L1;MOD:01485 K12	0	5239	Q2K133	Q2K133{260-301}	0.0001	0.0002	0.0003	Q2K133		66.02		32.2911				126.581
54186@20201019_1_3409_iTRAQ.cmpd.rclb.mgf	172.8	823.174	4	0	0.0061	0	2	DFRR	FNSGAEIFAAIASGDVQVGYVGSSPFAAAVSR	GLEV	MOD:01485 F1	0	4710	Q2K163	Q2K163{63-94}	0.0001	0.0002	0.0003	Q2K163		40.6						90.1408
38756@20201019_1_3409_iTRAQ.cmpd.rclb.mgf	123.23	555.29	4	0	0.003	0	2	TNFK	LTYLTGGDDVFGPDFGGAK	VYTN	MOD:01485 Y3;MOD:01485 K19	0	9188	Q2K5N5	Q2K5N5{215-233}	0.0001	0.0002	0.0003	Q2K5N5		39.22						63.3857
46817@20201019_1_3409_iTRAQ.cmpd.rclb.mgf	148.97	636.36	4	0	0.0021	0	2	MDVR	NTQPVTGIAESIQQTLAQAGVK	LEII	MOD:01485 N1;MOD:01485 K22	0	3376	Q2K350	Q2K350{390-411}	0.0001	0.0002	0.0003	Q2K350		93.33						95.5008
45954@20201019_1_3409_iTRAQ.cmpd.rclb.mgf	146.08	616.605	4	0	0.0009	0	2	RPGK	MAVIGNGVVVDPHALIAEIEK	LSAQ	MOD:01485 M1;MOD:01485 K21	0	1021	Q2K4X9	Q2K4X9{65-85}	0.0001	0.0002	0.0003	Q2K4X9		57.06						95.5162
40255@20201019_1_3409_iTRAQ.cmpd.rclb.mgf	127.65	534.043	4	0	-0.0056	0	2	DAWK	VGLTVDYQIVDNFYAK	ASVQ	MOD:01485 V1;MOD:01485 K16	0	6045	Q2K7H2;Q2KAI4	Q2K7H2{300-315};Q2KAI4{300-315}	0.0001	0.0002	0.0003	Q2K7H2;Q2KAI4		58.8						76.9626
31560@20201019_1_3409_iTRAQ.cmpd.rclb.mgf	101.68	635.318	4	0	-0.0022	0	2	LISR	HGVECWLVNTGWTGGAYGTGK	RMPI	MOD:01214 C5;MOD:01485 H1;MOD:01485 K21	0	7556	Q2KE66	Q2KE66{420-440}	0.0001	0.0002	0.0003	Q2KE66		40.71						59.7389
30186@20201019_1_3409_iTRAQ.cmpd.rclb.mgf	97.67	727.069	3	0	-0.0143	1	2	VAPK	LSLAVQDSLEKGDFAAAR	AIVG	MOD:01485 L1;MOD:01485 K11	0	6779	Q2JZ58	Q2JZ58{218-235}	0.0001	0.0002	0.0003	Q2JZ58		29.05						54.3968
38760@20201019_1_3409_iTRAQ.cmpd.rclb.mgf	123.25	615.009	3	0	0.0087	0	2	DAVK	YAGWPGILVGDVAQPR	GGPM	MOD:01485 Y1	0	3791	Q2KDT7	Q2KDT7{111-126}	0.0001	0.0002	0.0003	Q2KDT7		39.75						76.2793
58949@20201019_1_3409_iTRAQ.cmpd.rclb.mgf	190.65	662.636	4	0	0.0063	0	2	DTMK	LFVFGTPGGSQVNLVALLDNLGK	GASG	MOD:01485 L1;MOD:01485 K23	0	4921	Q2K9W7	Q2K9W7{272-294}	0.0001	0.0002	0.0003	Q2K9W7		36.41						86.6473
48850@20201019_1_3409_iTRAQ.cmpd.rclb.mgf	154.93	934.939	4	0	0.009	1	2	SDVK	RDGAVILGWTGDNGDPDNFMDTLLGCDAVGGNNR	AQWC	MOD:01214 C26;MOD:01485 R1	0	474	Q2KC86	Q2KC86{421-454}	0.0001	0.0002	0.0003	Q2KC86		60.17						98.5083
60040@20201019_1_3409_iTRAQ.cmpd.rclb.mgf	194.42	773.753	3	0	0.0029	0	2		PLINLPEFATELLSEFDAR	NAER	MOD:01485 P1	0	4705	Q2KC03	Q2KC03{2-20}	0.0001	0.0002	0.0003	Q2KC03		62.93						100.899
19215@20201019_1_3409_iTRAQ.cmpd.rclb.mgf	65.1	578.976	3	0	-0.0005	1	2	LDAK	RYDTVINQVGITEAR	KQKY		0	4137	Q2K336	Q2K336{93-107}	0.0001	0.0002	0.0003	Q2K336		34.2						76.152
42020@20201019_1_3409_iTRAQ.cmpd.rclb.mgf	132.85	622.102	4	0	0.0087	0	2	SIQR	ALLVLEQQGAEHFFGEPALK	ISDI	MOD:01485 A1;MOD:01485 K20	0	1318	Q2KB00	Q2KB00{194-213}	0.0001	0.0002	0.0003	Q2KB00		29.37						93.9651
37075@20201019_1_3409_iTRAQ.cmpd.rclb.mgf	118.32	576.812	4	0	0.0006	0	2	LGKK	ILNESGLAITAADDLDDAAK	KIVA	MOD:01485 I1;MOD:01485 K20	0	1104	Q2K3F0	Q2K3F0{370-389}	0.0001	0.0002	0.0003	Q2K3F0		33.97						70.6506
40798@20201019_1_3409_iTRAQ.cmpd.rclb.mgf	129.23	610.332	4	0	0.0051	0	2	ENAK	FADILEAHGITFIGPTADHIR	IMGD	MOD:01485 F1	0	10585	Q2K926	Q2K926{91-111}	0.0001	0.0002	0.0003	Q2K926		51.39						85.6392
4794@20201019_1_3409_iTRAQ.cmpd.rclb.mgf	22.45	471.609	3	0	-0.0063	1	2		TKTQAVSFSR	TGGP	MOD:01485 T1;MOD:01485 K2	0	3174	Q2K8H2	Q2K8H2{2-11}	0.0001	0.0002	0.0003	Q2K8H2		35.54						56.4369
40459@20201019_1_3409_iTRAQ.cmpd.rclb.mgf	128.23	820.656	4	0	-0.0004	0	2	FHVK	ADGSFTYDLASDIAPGDHITETIQYYK	ISDG	MOD:01485 A1;MOD:01485 K27	0	5138	Q2K591	Q2K591{181-207}	0.0001	0.0002	0.0003	Q2K591		31.44						74.612
53845@20201019_1_3409_iTRAQ.cmpd.rclb.mgf	171.8	519.295	4	0	-0.0007	0	2	NPEK	MIADLEDVFILLHEK	KLSN	MOD:01485 M1;MOD:01485 K15	0	6161	Q2KBZ7	Q2KBZ7{211-225}	0.0001	0.0002	0.0003	Q2KBZ7		54.87						64.21
46309@20201019_1_3409_iTRAQ.cmpd.rclb.mgf	147.13	615.103	4	1	0.0079	0	2	LAKK	FNSAVFPGLQGGPLMHIIAAK	AVAF	MOD:01485 F1;MOD:01485 K21	0	7228	Q2KA25	Q2KA25{257-277}	0.0001	0.0002	0.0003	Q2KA25		26.5						69.5782
19200@20201019_1_3409_iTRAQ.cmpd.rclb.mgf	65.07	507.778	4	0	0.0019	0	2	FLDR	AGISPGVIDGHMGSNVTK	GIYA	MOD:01485 A1;MOD:01485 K18	0	7410	Q2K686	Q2K686{201-218}	0.0001	0.0002	0.0003	Q2K686		47.25						75.1963
59380@20201019_1_3409_iTRAQ.cmpd.rclb.mgf	191.98	731.391	4	0	0.0023	0	2	LTVK	FTLNHPEAPFLADLAMDFASIVSK	EYAD	MOD:01485 F1;MOD:01485 K24	0	474	Q2KC86	Q2KC86{161-184}	0.0001	0.0002	0.0003	Q2KC86		46.7						65.8225
32247@20201019_1_3409_iTRAQ.cmpd.rclb.mgf	103.7	645.35	3	0	0.0062	0	2		TSINTNNAAMAALQTLR	GINQ	MOD:01485 T1	0	5239	Q2KCF0	Q2KCF0{2-18}	0.0001	0.0002	0.0003	Q2KCF0		86.07						111.654
32301@20201019_1_3409_iTRAQ.cmpd.rclb.mgf	103.87	628.836	4	0	0.0005	0	2	PAMK	EAGADIVIALSHSGIDGSAPSEK	MENA	MOD:01485 E1;MOD:01485 K23	0	3814	Q2K9C5	Q2K9C5{239-261}	0.0001	0.0002	0.0003	Q2K9C5		33.52						82.2715
42087@20201019_1_3409_iTRAQ.cmpd.rclb.mgf	133.03	693.847	2	0	0.0054	0	2	LGLK	QTLENPWAAFAR	SHPA	MOD:00040 Q1	0	4462	Q2KE13	Q2KE13{354-365}	0.0001	0.0002	0.0003	Q2KE13		31.68		12.5092				61.4976
34728@20201019_1_3409_iTRAQ.cmpd.rclb.mgf	110.97	579.807	4	0	0.002	1	2	RQRR	AIPYSDAVSSYVDKLDER	RGAV	MOD:01485 A1;MOD:01485 K14	0	5333	Q2K5P4	Q2K5P4{27-44}	0.0001	0.0002	0.0003	Q2K5P4		48.64						79.581
27170@20201019_1_3409_iTRAQ.cmpd.rclb.mgf	88.58	570.804	4	0	0.0034	0	2	KTGR	LVTVEEGYPQSSVGTEIATR	VMQQ	MOD:01485 L1	0	1883	Q2K8W6	Q2K8W6{395-414}	0.0001	0.0002	0.0003	Q2K8W6		40.95						62.672
42313@20201019_1_3409_iTRAQ.cmpd.rclb.mgf	135.03	809.684	4	0	0.001	1	2	DAFK	ATLNAGGITEVVNDAITPGDKDFSALTTR	IKSE	MOD:01485 A1;MOD:01485 K21	0	5167	Q2K5M7	Q2K5M7{181-209}	0.0001	0.0002	0.0003	Q2K5M7		44.71						113.631
47655@20201019_1_3409_iTRAQ.cmpd.rclb.mgf	151.43	617.071	4	0	0.0053	0	2	LSER	IVADDVFTSIHIEEFEVMAR	DTKL	MOD:01485 I1	0	4923	Q2K9M4	Q2K9M4{831-850}	0.0001	0.0002	0.0003	Q2K9M4		43.31						69.3594
48267@20201019_1_3409_iTRAQ.cmpd.rclb.mgf	153.23	732.894	4	0	0.0131	0	2	IRAK	QYQAVTVAEPLNLQGWQLVDELNR	AFAG	MOD:01485 Q1	0	4359	Q2K1J3	Q2K1J3{294-317}	0.0001	0.0002	0.0003	Q2K1J3		25.79						75.4101
43127@20201019_1_3409_iTRAQ.cmpd.rclb.mgf	137.65	645.372	3	0	0.0091	0	2		TSILTNVAAMAALQTLR	GIND	MOD:01485 T1;MOD:00719 M10	0	5239	Q2KCE9	Q2KCE9{2-18}	0.0001	0.0002	0.0003	Q2KCE9		26.33						77.7528
43604@20201019_1_3409_iTRAQ.cmpd.rclb.mgf	139.05	638.337	4	0	-0.008	1	2	SISK	RIELQENFVSALSDSIDSGIGR	LVDA	MOD:01485 R1	0	5239	Q2KCF0	Q2KCF0{238-259}	0.0001	0.0002	0.0003	Q2KCF0		33.79		29.2457				50.9667
29072@20201019_1_3409_iTRAQ.cmpd.rclb.mgf	94.4	660.303	4	1	-0.0106	0	2	GYIR	FQVDVGDQPLNGSASNDSDWDAR	TRGQ	MOD:01485 F1	0	6045	Q2K7H2;Q2KAI4	Q2K7H2{65-87};Q2KAI4{65-87}	0.0001	0.0002	0.0003	Q2K7H2;Q2KAI4		44.57						91.2847
38054@20201019_1_3409_iTRAQ.cmpd.rclb.mgf	121.17	758.063	3	1	-0.0145	0	2		PINITMPALSPTMEEGNLAK	WLVK	MOD:01485 K20	0	4223	Q2K8W5	Q2K8W5{2-21}	0.0001	0.0002	0.0003	Q2K8W5		34.57						89.3315
50391@20201019_1_3409_iTRAQ.cmpd.rclb.mgf	160.88	1168.18	2	0	0.0017	0	2	TDAK	VDAVLSPYDGLSIGIISSLK	GVGY	MOD:01485 V1;MOD:01485 K20	0	5613	Q2K5F5	Q2K5F5{229-248}	0.0001	0.0002	0.0003	Q2K5F5		54.43						105.178
50754@20201019_1_3409_iTRAQ.cmpd.rclb.mgf	162.4	710.367	4	0	0	0	2	EKFK	AAGFNPEAYTLYSYAAMQAIAGAAK	AAGS	MOD:01485 A1;MOD:01485 K25	0	3055	Q2K502	Q2K502{289-313}	0.0001	0.0002	0.0003	Q2K502		32.55						87.4147
24321@20201019_1_3409_iTRAQ.cmpd.rclb.mgf	80.22	554.32	2	0	-0.0006	0	2		AFLADALSR	VKPS	MOD:01485 A1	0	3230	Q2K5X1	Q2K5X1{2-10}	0.0001	0.0002	0.0003	Q2K5X1		48.93						123.392
31595@20201019_1_3409_iTRAQ.cmpd.rclb.mgf	101.78	699.871	4	0	-0.0021	0	2	GEQR	LVSGVCLASIGAVSNPDHANINDGK	AGRT	MOD:01214 C6;MOD:01485 L1;MOD:01485 K25	0	473	Q2K9L3	Q2K9L3{184-208}	0.0001	0.0002	0.0003	Q2K9L3		86.38						80.3311
33286@20201019_1_3409_iTRAQ.cmpd.rclb.mgf	106.75	541.821	4	0	-0.0006	0	2	EALR	LAGEVIPSVRPNIGVEITR	EALG	MOD:01485 L1	0	3487	Q2K5F9	Q2K5F9{117-135}	0.0001	0.0002	0.0003	Q2K5F9		35.59						71.4662
51842@20201019_1_3409_iTRAQ.cmpd.rclb.mgf	165.58	862.513	2	0	0.0033	0	2	AREK	QFLIPEAPIGASLIK	IYSR	MOD:00040 Q1;MOD:01485 K15	0	6989	Q2K0L8	Q2K0L8{110-124}	0.0001	0.0002	0.0003	Q2K0L8		54.05		26.7951				86.6572
1958@20201019_1_3409_iTRAQ.cmpd.rclb.mgf	14.07	495.29	3	0	-0.0118	1	2	TGRR	VAAASIEHNRK	FQLE	MOD:01485 V1;MOD:01485 K11	0	3487	Q2K5F9	Q2K5F9{232-242}	0.0001	0.0002	0.0003	Q2K5F9		40.04						54.4209
30316@20201019_1_3409_iTRAQ.cmpd.rclb.mgf	98.05	545.101	5	0	0.0069	0	2	DNKK	LSIGVDSNQNHLHPGSVLTSMVK	RVDL	MOD:01485 L1;MOD:01485 K23	0	2076	Q2KDS5	Q2KDS5{231-253}	0.0001	0.0002	0.0003	Q2KDS5		64.77						68.6743
13336@20201019_1_3409_iTRAQ.cmpd.rclb.mgf	47.73	423.455	4	0	0.0082	0	2	APEK	ADHYHLYWGNDR	AALL	MOD:01485 A1	0	5835	Q2JZD7	Q2JZD7{175-186}	0.0001	0.0002	0.0003	Q2JZD7		29						60.1436
21440@20201019_1_3409_iTRAQ.cmpd.rclb.mgf	71.68	686.873	4	0	0.0029	1	2	YSKK	HKAVAEIPEGAVIGVPNDPSNEGR	ALRV	MOD:01485 H1;MOD:01485 K2	0	5940	Q2K283	Q2K283{131-154}	0.0001	0.0002	0.0003	Q2K283		61.14						60.1805
60427@20201019_1_3409_iTRAQ.cmpd.rclb.mgf	199.03	1070.22	3	0	0.0083	0	2	NIAR	QWYDTEQVDAIMELTTSSVALAVQAIAK	EKKK	MOD:00040 Q1;MOD:01485 K28	0	8393	Q2K0R6	Q2K0R6{89-116}	0.0001	0.0002	0.0003	Q2K0R6		40.99						43.6576
22322@20201019_1_3409_iTRAQ.cmpd.rclb.mgf	74.27	540.787	2	0	-0.0015	0	2		ALPDFSMR	QLLE	MOD:01485 A1	0	1982	Q2K8Y7	Q2K8Y7{2-9}	0.0001	0.0002	0.0003	Q2K8Y7		27.32						88.928
22797@20201019_1_3409_iTRAQ.cmpd.rclb.mgf	75.65	501.511	4	0	0.0048	0	2	KDKK	AGDVTGDGVGGNWDVAKP		MOD:01485 A1;MOD:01485 K17	0	2193	Q2K6I9	Q2K6I9{109-126}	0.0001	0.0002	0.0003	Q2K6I9		42.45						83.3289
25456@20201019_1_3409_iTRAQ.cmpd.rclb.mgf	83.55	549.568	4	0	0.0006	1	2	LLGR	VVDALGNPIDGKGPINATR	RSRV	MOD:01485 V1;MOD:01485 K12	0	964	Q2K3G8	Q2K3G8{107-125}	0.0001	0.0002	0.0003	Q2K3G8		42.93						73.8188
49624@20201019_1_3409_iTRAQ.cmpd.rclb.mgf	158.5	1020.01	4	0	-0.0012	1	2	GSGK	STLSYVLSGREDYEVTEGDILYNGESILELDPAER	AAKG	MOD:01485 S1	0	801	Q2K805	Q2K805{43-77}	0.0001	0.0002	0.0003	Q2K805		29.51		30.4946				75.2881
46959@20201019_1_3409_iTRAQ.cmpd.rclb.mgf	149.38	985.138	3	0	-0.0058	0	2	NTLR	LVQEEGGFLYSSDSYADDLPYWVR	GVDG	MOD:01485 L1	0	1314	Q2K5H8	Q2K5H8{176-199}	0.0001	0.0002	0.0003	Q2K5H8		45.68						109.763
36511@20201019_1_3409_iTRAQ.cmpd.rclb.mgf	116.65	526.038	4	0	0.0032	1	2	VLTK	RADATINDSLSFLDFK	KHKP	MOD:01485 R1;MOD:01485 K16	0	4137	Q2K336	Q2K336{180-195}	0.0001	0.0002	0.0003	Q2K336		48.07						50.5594
34212@20201019_1_3409_iTRAQ.cmpd.rclb.mgf	109.45	887.428	3	1	0.001	0	2	IFDK	AGVPYPTNDMTWAQFDETAEK	LAGG	MOD:01485 A1;MOD:01485 K21	0	9790	Q2JYX5	Q2JYX5{161-181}	0.0001	0.0002	0.0003	Q2JYX5		33.3						104.418
34014@20201019_1_3409_iTRAQ.cmpd.rclb.mgf	108.87	618.347	4	0	0.0009	0	2	DFLR	VSGNTQVTVEIPVHFINEAK	SPGL	MOD:01485 V1;MOD:01485 K20	0	7015	Q2K5U4	Q2K5U4{98-117}	0.0001	0.0002	0.0003	Q2K5U4		40.4						84.1609
45044@20201019_1_3409_iTRAQ.cmpd.rclb.mgf	143.4	958.512	4	0	-0.0046	0	2	DGVK	FVIGHFNSGVSIPASEVYAENGILEITPAATNPK	FTER	MOD:01485 F1;MOD:01485 K34	0	3055	Q2K502	Q2K502{94-127}	0.0001	0.0002	0.0003	Q2K502		38.12						118.021
51200@20201019_1_3409_iTRAQ.cmpd.rclb.mgf	163.72	515.316	4	0	-0.0038	0	2	DGTR	AFIAGVPVWGTLIGLQK	KGRA	MOD:01485 A1;MOD:01485 K17	0	4241	Q2K4A7	Q2K4A7{102-118}	0.0001	0.0002	0.0003	Q2K4A7		29.36						68.8958
51062@20201019_1_3409_iTRAQ.cmpd.rclb.mgf	163.3	758.137	4	0	-0.0021	0	2	RVTR	VPSGHPEGYLEAFATIYTEAAHAINAR	KKGK	MOD:01485 V1	0	9336	Q2K439	Q2K439{328-354}	0.0001	0.0002	0.0003	Q2K439		27.36		28.3358				44.7954
35454@20201019_1_3409_iTRAQ.cmpd.rclb.mgf	113.25	552.11	5	0	0.0041	0	2	SSLK	GVGYGTAAQPLPIVTGQDAEIPSVK	SIIA	MOD:01485 G1;MOD:01485 K25	0	5613	Q2K5F5	Q2K5F5{249-273}	0.0001	0.0002	0.0003	Q2K5F5		59.17						75.5638
7235@20201019_1_3409_iTRAQ.cmpd.rclb.mgf	29.68	511.268	2	0	0.0069	0	2	TADR	QAPAPVHYR	TAKI	MOD:00040 Q1	0	14	Q2K0G7	Q2K0G7{33-41}	0.0001	0.0002	0.0003	Q2K0G7		42.49						75.6769
44986@20201019_1_3409_iTRAQ.cmpd.rclb.mgf	143.25	571.825	4	0	-0.0021	0	2	ANAK	VIHDFVAANDWIANLAVK	AETA	MOD:01485 V1;MOD:01485 K18	0	8517	Q2K4M5	Q2K4M5{283-300}	0.0001	0.0002	0.0003	Q2K4M5		26.32						71.3429
13813@20201019_1_3409_iTRAQ.cmpd.rclb.mgf	49.13	394.973	4	0	0.0025	0	2	DAAK	VGFTAGETLHEK	VSYK	MOD:01485 V1;MOD:01485 K12	0	5138	Q2K591	Q2K591{79-90}	0.0001	0.0002	0.0003	Q2K591		53.4						48.3456
33134@20201019_1_3409_iTRAQ.cmpd.rclb.mgf	106.3	491.274	4	0	0.0075	0	2	PDIK	INLEFVPYEGLHDK	TVLA	MOD:01485 I1;MOD:01485 K14	0	9432	Q2K4U9	Q2K4U9{60-73}	0.0001	0.0002	0.0003	Q2K4U9		49.11						53.0236
34397@20201019_1_3409_iTRAQ.cmpd.rclb.mgf	110	577.307	4	0	0.0039	0	2	NGVK	IGYLTCDIGGGTGYVLGSSK	EADC	MOD:01214 C6;MOD:01485 Y3;MOD:01485 K20	0	6818	Q2K1U0	Q2K1U0{43-62}	0.0001	0.0002	0.0003	Q2K1U0		37.1						76.1391
39094@20201019_1_3409_iTRAQ.cmpd.rclb.mgf	124.23	700.898	4	0	-0.0017	0	2	NVAR	AEPDGHTILMGTVATHALNPLILK	STPY	MOD:01485 A1;MOD:01485 K24	0	3525	Q2K4H2	Q2K4H2{89-112}	0.0001	0.0002	0.0003	Q2K4H2		34.58						107.924
41173@20201019_1_3409_iTRAQ.cmpd.rclb.mgf	130.33	785.367	4	0	0.001	0	2	KQMK	YDADNSDLSDLSAPYQHLVEDSPWTR	SSVS	MOD:01485 Y1	0	2957	Q2K8Y0	Q2K8Y0{546-571}	0.0001	0.0002	0.0003	Q2K8Y0		56.45		34.5991				90.5726
28423@20201019_1_3409_iTRAQ.cmpd.rclb.mgf	92.27	530.038	4	0	0.004	0	2	GAAR	LAVAGDNPMLLSEQDAGK	VGRA	MOD:01485 L1;MOD:01485 K18	0	9869	Q2KDI3	Q2KDI3{107-124}	0.0001	0.0002	0.0003	Q2KDI3		34.09						65.9097
32769@20201019_1_3409_iTRAQ.cmpd.rclb.mgf	105.23	761.373	4	0	0.0045	0	2	VEFK	HGGTEIEPGLADSWSVSADGTEYTFK	LHPG	MOD:01485 H1;MOD:01485 K26	0	474	Q2KC86	Q2KC86{64-89}	0.0001	0.0002	0.0003	Q2KC86		95.71						88.0539
45407@20201019_1_3409_iTRAQ.cmpd.rclb.mgf	144.48	614.331	4	1	-0.0051	0	2	LGFR	IFDCGNVPTPALALYGLESK	AACL	MOD:01214 C4;MOD:01485 I1;MOD:01485 K20	0	911	Q2K579	Q2K579{71-90}	0.0001	0.0002	0.0003	Q2K579		25.57		24.0398				56.5291
43510@20201019_1_3409_iTRAQ.cmpd.rclb.mgf	138.77	577.819	4	0	-0.0017	0	2	FNKK	QLVDITSLPGMENFSAVAK	AAWT	MOD:01485 Q1;MOD:01485 K19	0	8161	Q2K670	Q2K670{102-120}	0.0001	0.0002	0.0003	Q2K670		78.32						89.7647
33123@20201019_1_3409_iTRAQ.cmpd.rclb.mgf	106.27	677.846	4	0	0.0012	0	2	GSIK	AASPAGAYLIGHDVAVADFNQYGTR	RGNH	MOD:01485 A1	0	9609	Q2K397	Q2K397{688-712}	0.0001	0.0002	0.0003	Q2K397		61.6						85.2882
59091@20201019_1_3409_iTRAQ.cmpd.rclb.mgf	191.1	844.972	4	0	0.0025	0	2	ESSK	LSALQTQQQLAVQSLSIANSSSQTILSLFR	G	MOD:01485 L1	0	5239	Q2KCF0	Q2KCF0{272-301}	0.0001	0.0002	0.0003	Q2KCF0		40.43						118.55
13981@20201019_1_3409_iTRAQ.cmpd.rclb.mgf	49.62	586.047	4	0	0.0058	0	2	PIPR	ANSGTPQQTASLGSEADQYK	AAYG	MOD:01485 A1;MOD:01485 K20	0	4009	Q2K4M0	Q2K4M0{111-130}	0.0001	0.0002	0.0003	Q2K4M0		38.79						72.2611
42315@20201019_1_3409_iTRAQ.cmpd.rclb.mgf	135.05	839.926	4	0	0.0007	1	2	PQYK	FVMEGAADIAQETGLATGKYDIATGGYYR	APAR	MOD:01485 F1;MOD:01485 K19	0	6989	Q2K0L8	Q2K0L8{75-103}	0.0001	0.0002	0.0003	Q2K0L8		54.12						110.398
38244@20201019_1_3409_iTRAQ.cmpd.rclb.mgf	121.73	1085.56	4	0	-0.0059	0	2		ANHKPVAADVYQPIFDIDKPVDGNILDGSTDADGDLVR	LNFV	MOD:01485 K4;MOD:01485 K19	0	3114	Q2K4M9	Q2K4M9{2-39}	0.0001	0.0002	0.0003	Q2K4M9		46.68						83.8619
14146@20201019_1_3409_iTRAQ.cmpd.rclb.mgf	50.12	467.242	4	0	0.0034	1	2	TPSR	RGDGHADLSYVYAAAR	EIAT	MOD:01485 R1	0	559	Q2K584	Q2K584{86-101}	0.0001	0.0002	0.0003	Q2K584		58.33						52.7987
47713@20201019_1_3409_iTRAQ.cmpd.rclb.mgf	151.6	586.083	4	0	-0.005	0	2	IDKK	FVVDTIFLGYAAASTGPVPK	NAPE	MOD:01485 F1;MOD:01485 K20	0	10010	Q2K249	Q2K249{316-335}	0.0001	0.0002	0.0003	Q2K249		32.06						72.2793
32296@20201019_1_3409_iTRAQ.cmpd.rclb.mgf	103.85	604.561	4	1	0.0061	0	2	VFIK	GSSSDPNADFLFSGQQEVLK	AAID	MOD:01485 G1;MOD:01485 K20	0	10540	Q2K5E8	Q2K5E8{153-172}	0.0001	0.0002	0.0003	Q2K5E8		43.73						67.4157
40054@20201019_1_3409_iTRAQ.cmpd.rclb.mgf	127.05	655.092	4	0	0.0075	0	2	GGNR	HGFLAFAEIHPDYYQIPLADR	QALL	MOD:01485 H1	0	224	Q2K9P2	Q2K9P2{66-86}	0.0001	0.0002	0.0003	Q2K9P2		59.14						97.078
25677@20201019_1_3409_iTRAQ.cmpd.rclb.mgf	84.2	586.32	4	0	0.003	1	2	LAQK	VISDDVILDHTEREIGDK	AIVT	MOD:01485 V1;MOD:01485 K18	0	4334	Q2KCV4	Q2KCV4{50-67}	0.0001	0.0002	0.0003	Q2KCV4		32.43						68.5011
41395@20201019_1_3409_iTRAQ.cmpd.rclb.mgf	131	519.809	4	0	-0.0012	0	2	LVAR	IIFLEGHPNLQTLAPLR	IGQN	MOD:01485 I1	0	2845	Q2K2W2	Q2K2W2{70-86}	0.0001	0.0002	0.0003	Q2K2W2		40.57						103.2
19654@20201019_1_3409_iTRAQ.cmpd.rclb.mgf	66.4	485.274	4	0	0.0034	1	2	VFVR	RTHGEDLSGLNAVVIGR	SNLF	MOD:01485 R1	0	7325	Q2KCC6	Q2KCC6{153-169}	0.0001	0.0002	0.0003	Q2JZV0;Q2KCC6		31.03						47.9273
22578@20201019_1_3409_iTRAQ.cmpd.rclb.mgf	75.02	640.684	3	0	0.0067	0	2		TSINTNSSAQAALQTLR	NVNQ	MOD:01485 T1	0	5239	Q2KCF1	Q2KCF1{2-18}	0.0001	0.0002	0.0003	Q2KCF1		92.9						108.364
48179@20201019_1_3409_iTRAQ.cmpd.rclb.mgf	152.97	759.637	4	0	0.0021	0	2	KTSK	NHGAAYIASFPIPEVVMGINSFEQGAR	SVDP	MOD:01485 N1;MOD:00719 M17	0	10500	Q2K8G8	Q2K8G8{150-176}	0.0001	0.0002	0.0003	Q2K8G8		26.58						49.6066
47104@20201019_1_3409_iTRAQ.cmpd.rclb.mgf	149.8	834.464	3	1	-0.0208	0	2	PKVK	TIGYLYNSGEANSVSLLAVLK	AEAE	MOD:01485 T1;MOD:01485 K21	0	5726	Q2K3B2	Q2K3B2{156-176}	0.0001	0.0002	0.0003	Q2K3B2		26.78						96.3182
41732@20201019_1_3409_iTRAQ.cmpd.rclb.mgf	132	796.153	4	0	-0.0016	0	2	ELAK	WKPYLGDGFEAQTYSDSQNLFTLGR	AAIY	MOD:01485 W1;MOD:01485 Y4	0	8161	Q2K670	Q2K670{234-258}	0.0001	0.0002	0.0003	Q2K670		58.54						83.0134
57530@20201019_1_3409_iTRAQ.cmpd.rclb.mgf	184.93	847.036	5	0	0.0085	0	2	GVEK	AVEAANTEIFDAIGGIDAENQIQIDNIMIELDGTPNK	SRLG	MOD:01485 A1;MOD:01485 K37	0	10555	Q2K8W9	Q2K8W9{66-102}	0.0001	0.0002	0.0003	Q2K8W9		29.75						84.6326
37005@20201019_1_3409_iTRAQ.cmpd.rclb.mgf	118.1	754.123	4	0	0.0082	0	2	VPYK	GTGPAMTDLLGGQVDIMCDQTTNTTK	QIKG	MOD:01214 C18;MOD:01485 G1;MOD:01485 K26	0	8013	Q2K4P7	Q2K4P7{187-212}	0.0001	0.0002	0.0003	Q2K4P7		25.38						82.0918
45585@20201019_1_3409_iTRAQ.cmpd.rclb.mgf	144.98	1045.22	3	0	-0.006	0	2	ELTK	NQIDQGADVIYAAAGATGLGVLQTAADNK	KLSI	MOD:01485 N1;MOD:01485 K29	0	2076	Q2KDS5	Q2KDS5{201-229}	0.0001	0.0002	0.0003	Q2KDS5		94.52						142.348
32698@20201019_1_3409_iTRAQ.cmpd.rclb.mgf	105.03	655.112	4	0	0.0025	0	2	AAAK	AAASAGKPWVLDPVAHYATTFR	RQAV	MOD:01485 A1;MOD:01485 K7	0	2412	Q2K0X8	Q2K0X8{75-96}	0.0001	0.0002	0.0003	Q2K0X8		38.86						69.265
31605@20201019_1_3409_iTRAQ.cmpd.rclb.mgf	101.83	508.282	3	0	0.0018	0	2	KYLR	NLEAMMLVADK	SITL	MOD:01485 N1;MOD:01485 K11	0	1361	Q2KE55	Q2KE55{91-101}	0.0001	0.0002	0.0003	Q2KE55		34.74						75.3954
30893@20201019_1_3409_iTRAQ.cmpd.rclb.mgf	99.73	593.3	5	0	-0.0158	0	2	VVKK	SFGTNAGLFNNAAQHYNHIHFWK	WMKK	MOD:01485 S1;MOD:01485 K23	0	3834	Q2KAX8	Q2KAX8{60-82}	0.0001	0.0002	0.0003	Q2KAX8		31.07		28.9654				81.1067
37327@20201019_1_3409_iTRAQ.cmpd.rclb.mgf	119.05	722.102	4	0	0.0007	0	2	NGMR	GWVYADYLQMDYGGNQVIVEQHR	AEIG	MOD:01485 G1	0	3301	Q2K5V7	Q2K5V7{76-98}	0.0001	0.0002	0.0003	Q2K5V7		66.71						73.9164
2098@20201019_1_3409_iTRAQ.cmpd.rclb.mgf	14.48	451.253	2	0	0.0073	0	2	GEPK	QGVSAANK	VVGD	MOD:00040 Q1;MOD:01485 K8	0	5167	Q2K5M7	Q2K5M7{78-85}	0.0001	0.0002	0.0003	Q2K5M7		35.58						65.7347
58248@20201019_1_3409_iTRAQ.cmpd.rclb.mgf	188.37	814.431	6	0	0.0019	1	2	GVGR	LVDADMEEESSKLSALQTQQQLAIQSLSIANSSSQNILSLFR	G	MOD:01485 L1;MOD:01485 K12	0	5239	Q2K133	Q2K133{260-301}	0.0001	0.0002	0.0003	Q2K133		49.98						91.3781
21775@20201019_1_3409_iTRAQ.cmpd.rclb.mgf	72.68	462.756	4	0	0.0077	0	2	NSWK	IVDFTSEARPIYHR	DDKK	MOD:01485 I1	0	3814	Q2K9C5	Q2K9C5{337-350}	0.0001	0.0002	0.0003	Q2K9C5		31.4						39.9773
58799@20201019_1_3409_iTRAQ.cmpd.rclb.mgf	190.2	588.338	4	0	0.0102	0	2	SDSK	TVIGYDVDLAQAIADSLGLK	LNLV	MOD:01485 T1;MOD:01485 K20	0	1161	Q2K153	Q2K153{85-104}	0.0001	0.0002	0.0003	Q2K153		36.29						57.725
31552@20201019_1_3409_iTRAQ.cmpd.rclb.mgf	101.67	594.83	4	0	0.0019	0	2	MGVK	NFAAVVNPPHATILAVGAGEQR	VVVK	MOD:01485 N1	0	4223	Q2K8W5	Q2K8W5{380-401}	0.0001	0.0002	0.0003	Q2K8W5		43.54						109.448
29113@20201019_1_3409_iTRAQ.cmpd.rclb.mgf	94.5	975.516	2	0	0.0005	0	2		TSINTNNAAMAALQTLR	GINQ	MOD:01485 T1;MOD:00719 M10	0	5239	Q2KCF0	Q2KCF0{2-18}	0.0001	0.0002	0.0003	Q2KCF0		83.01		19.3878				110.719
27354@20201019_1_3409_iTRAQ.cmpd.rclb.mgf	89.12	600.317	3	0	-0.0047	0	2	PVDR	TLTDEDFEALTQK	IVAS	MOD:01485 T1;MOD:01485 K13	0	9650	Q2KDJ9	Q2KDJ9{780-792}	0.0001	0.0002	0.0003	Q2KDJ9		33.96						74.9478
50979@20201019_1_3409_iTRAQ.cmpd.rclb.mgf	163.05	839.196	4	0	-0.008	0	2	MNK	QITNFADARPTDAVDAVFESFPLTIAQK	RIWS	MOD:01485 Q1;MOD:01485 K28	0	5495	Q2JYI9	Q2JYI9{4-31}	0.0001	0.0002	0.0003	Q2JYI9		29.34		30.0329				92.1388
16733@20201019_1_3409_iTRAQ.cmpd.rclb.mgf	57.85	608.882	2	1	-0.0077	0	2	GPCK	QLTPVLEK	VVNE	MOD:01485 Q1;MOD:01485 K8	0	8891	Q2K362	Q2K362{71-78}	0.0001	0.0002	0.0003	Q2K362		44.17		16.4437				102.356
28572@20201019_1_3409_iTRAQ.cmpd.rclb.mgf	92.75	660.055	4	0	-0.0031	0	2	GYIR	FQVDVGDQPLNGSASNDSDWDAR	TRGQ	MOD:01485 F1	0	6045	Q2K7H2;Q2KAI4	Q2K7H2{65-87};Q2KAI4{65-87}	0.0001	0.0002	0.0003	Q2K7H2;Q2KAI4		51.91						85.3114
59256@20201019_1_3409_iTRAQ.cmpd.rclb.mgf	191.58	979.521	5	0	-0.0113	1	2	GVGR	LVDADMEEESSKLTALQTQQQLAIQSLSIANSSAQNILTLFR	S	MOD:01485 L1;MOD:01485 K12	0	5239	Q2KCE9	Q2KCE9{261-302}	0.0001	0.0002	0.0003	Q2KCE9		66.01		38.7837				115.812
48237@20201019_1_3409_iTRAQ.cmpd.rclb.mgf	153.13	782.636	4	0	0.0021	1	2	YYKK	YFAEAADEKTYQTLDEAFQDLASGR	IDYV	MOD:01485 Y1;MOD:01485 Y11	0	876	Q2K1K6	Q2K1K6{148-172}	0.0001	0.0002	0.0003	Q2K1K6		64.11						103.569
47691@20201019_1_3409_iTRAQ.cmpd.rclb.mgf	151.53	753.873	4	0	0.0016	0	2	KVAK	YYYYPGWWEGGPTVHAFFNLEK	WSGL	MOD:01485 Y1;MOD:01485 K22	0	2578	Q2K462	Q2K462{235-256}	0.0001	0.0002	0.0003	Q2K462		41.39						94.7463
36338@20201019_1_3409_iTRAQ.cmpd.rclb.mgf	116.15	624.804	4	0	0.0016	0	2	EEMR	ASDDVFVMGEEVAEYQGAYK	VTQG	MOD:01485 A1;MOD:01485 K20	0	1883	Q2K8W6	Q2K8W6{158-177}	0.0001	0.0002	0.0003	Q2K8W6		58.44						74.2225
26996@20201019_1_3409_iTRAQ.cmpd.rclb.mgf	88.07	638.352	4	1	0.0003	1	2	TLGR	IMNVIGEPVDEAGPLNTAHKR	AIHQ	MOD:01485 I1;MOD:01485 K20	0	8381	Q2K3H0	Q2K3H0{93-113}	0.0001	0.0002	0.0003	Q2K3H0		61.97						53.3907
21758@20201019_1_3409_iTRAQ.cmpd.rclb.mgf	72.62	592.65	3	0	0.0086	0	2		TSINTNSSAQAALQTLR	NVNQ		0	5239	Q2KCF1	Q2KCF1{2-18}	0.0001	0.0002	0.0003	Q2KCF1		92.41						64.2446
18585@20201019_1_3409_iTRAQ.cmpd.rclb.mgf	63.27	586.628	3	0	0.007	0	2	ESYR	AYIGEADLYNSNGAR	LAQP	MOD:01485 A1	0	6264	Q2K135	Q2K135{38-52}	0.0001	0.0002	0.0003	Q2K135		39.01						75.8108
49178@20201019_1_3409_iTRAQ.cmpd.rclb.mgf	156.47	910.434	4	1	-0.0028	0	2	VKAK	GFIQCGVNTGLAGFAAPDASGNWAGFDVDFCK	AVAS	MOD:01214 C5;MOD:01214 C31;MOD:01485 G1;MOD:01485 K32	0	6573	Q2K902	Q2K902{41-72}	0.0001	0.0002	0.0003	Q2K902		78.44		27.5995				113.17
40596@20201019_1_3409_iTRAQ.cmpd.rclb.mgf	128.63	690.12	4	0	0.0067	0	2	VLLK	GIAPELAENGGEGVLVVDDLTDTGK	TAAQ	MOD:01485 G1;MOD:01485 K25	0	6457	Q2K9D7	Q2K9D7{81-105}	0.0001	0.0002	0.0003	Q2K9D7		34.93						77.4184
43087@20201019_1_3409_iTRAQ.cmpd.rclb.mgf	137.47	589.544	4	0	0.0059	0	2	LSSR	IDSQEDFVSALSDSIDSGIGR	LVDA	MOD:01485 I1	0	5239	Q2KCF1	Q2KCF1{239-259}	0.0001	0.0002	0.0003	Q2KCF1		77.4						63.9676
22217@20201019_1_3409_iTRAQ.cmpd.rclb.mgf	73.97	653.089	4	0	0.0045	0	2	FLTK	QVDANNGAVTDVQGTYGTFHVK	ADGS	MOD:01485 Q1;MOD:01485 K22	0	201	Q2K1Q3	Q2K1Q3{162-183}	0.0001	0.0002	0.0003	Q2K1Q3		86.48						67.0823
40968@20201019_1_3409_iTRAQ.cmpd.rclb.mgf	129.73	839.675	4	0	-0.0013	1	2	QKLR	GLVSQQMTMMGTWLQTEQTDKDLAQAR	REKF	MOD:01485 G1;MOD:01485 K21	0	478	Q2K2Q6	Q2K2Q6{219-245}	0.0001	0.0002	0.0003	Q2K2Q6		31.47						98.8746
11432@20201019_1_3409_iTRAQ.cmpd.rclb.mgf	42.17	565.824	2	1	-0.0081	0	2	YLAK	NVVAAGLADR	CTIQ	MOD:01485 N1	0	4851	Q2KD94	Q2KD94{309-318}	0.0001	0.0002	0.0003	Q2KD94		50.6						138.042
50173@20201019_1_3409_iTRAQ.cmpd.rclb.mgf	160.13	691.375	3	0	0.0038	0	2	PILK	QGNVPMVIMNAATSAIVTK	SPLV	MOD:00040 Q1;MOD:01485 K19	0	2946	Q2K4N4	Q2K4N4{111-129}	0.0001	0.0002	0.0003	Q2K4N4		42.97						67.0595
7446@20201019_1_3409_iTRAQ.cmpd.rclb.mgf	30.28	571.643	3	0	-0.0021	1	2		SQETYELKAEAR	ERVG	MOD:01485 S1;MOD:01485 K8	0	7015	Q2K5U4	Q2K5U4{2-13}	0.0001	0.0002	0.0003	Q2K5U4		57.36						91.7383
27339@20201019_1_3409_iTRAQ.cmpd.rclb.mgf	89.07	817.066	3	1	-0.0136	0	2	FLTK	QVDANNGAVTDVQGTYGTFHVK	ADGS	MOD:00040 Q1;MOD:01485 K22	0	201	Q2K1Q3	Q2K1Q3{162-183}	0.0001	0.0002	0.0003	Q2K1Q3		64.72						94.6429
8929@20201019_1_3409_iTRAQ.cmpd.rclb.mgf	34.82	530.598	3	1	-0.0132	0	2	KFDK	SFNEAAYNGAEK	FKAE	MOD:01485 S1;MOD:01485 K12	0	2076	Q2KDS5	Q2KDS5{38-49}	0.0001	0.0002	0.0003	Q2KDS5		27.39						63.5841
17462@20201019_1_3409_iTRAQ.cmpd.rclb.mgf	59.98	495.275	4	0	0.0102	0	2	RSLK	IGDELGGHIVSGHVDGK	AEIL	MOD:01485 I1;MOD:01485 K17	0	8848	Q2KA22	Q2KA22{94-110}	0.0001	0.0002	0.0003	Q2KA22		48.74						70.7967
30199@20201019_1_3409_iTRAQ.cmpd.rclb.mgf	97.7	558.312	4	0	0.0009	0	2	AEQR	SEIVQNLEEGQVVDGVVK	NITD	MOD:01485 S1;MOD:01485 K18	0	4462	Q2KE13	Q2KE13{189-206}	0.0001	0.0002	0.0003	Q2KE13		60.1						64.9041
38007@20201019_1_3409_iTRAQ.cmpd.rclb.mgf	121.03	560.8	4	0	0.0001	1	2	ELGR	DVKDTAYMLPYGFYLR	AMFY	MOD:01485 D1;MOD:01485 K3	0	117	Q2K0N6	Q2K0N6{124-139}	0.0001	0.0002	0.0003	Q2K0N6		26						51.4479
39496@20201019_1_3409_iTRAQ.cmpd.rclb.mgf	125.4	751.409	3	0	0.0012	0	2		AESYDVIIIGSGPGGYVAAIR	ASQL	MOD:01485 A1	0	7963	O05940	O05940{2-22}	0.0001	0.0002	0.0003	O05940		49.09						98.8865
18451@20201019_1_3409_iTRAQ.cmpd.rclb.mgf	62.88	430.5	4	0	-0.0007	0	2	PSVK	SIIAGEQHSTIFK	DTRE	MOD:01485 S1;MOD:01485 K13	0	5613	Q2K5F5	Q2K5F5{274-286}	0.0001	0.0002	0.0003	Q2K5F5		64.57						74.4334
30108@20201019_1_3409_iTRAQ.cmpd.rclb.mgf	97.43	531.32	3	1	-0.0101	0	2	ALNR	IALGTQTVSVWK	DSRE	MOD:01485 I1;MOD:01485 K12	0	10540	Q2K5E8	Q2K5E8{253-264}	0.0001	0.0002	0.0003	Q2K5E8		25.74		19.6397				60.7993
28492@20201019_1_3409_iTRAQ.cmpd.rclb.mgf	92.5	1001.48	3	0	-0.0189	0	2	DAAK	AMVDQGVDVLTQHTDTTAPMQVAEER	GIHA	MOD:01485 A1;MOD:00719 M2	0	10500	Q2K8G8	Q2K8G8{204-229}	0.0001	0.0002	0.0003	Q2K8G8		67.93						112.308
47660@20201019_1_3409_iTRAQ.cmpd.rclb.mgf	151.43	654.356	4	0	0.0009	0	2	TLGR	AAIYPAGSWEIALFNTQAQFK	MGAF	MOD:01485 A1;MOD:01485 K21	0	8161	Q2K670	Q2K670{259-279}	0.0001	0.0002	0.0003	Q2K670		65.76						78.6637
52126@20201019_1_3409_iTRAQ.cmpd.rclb.mgf	166.42	1184.91	3	0	0.0067	0	2	NIVK	QLQAAGYGTDLQYGDDDIPNQLSQIENMVTK	GVKV	MOD:00040 Q1;MOD:01485 K31	0	5613	Q2K5F5	Q2K5F5{52-82}	0.0001	0.0002	0.0003	Q2K5F5		33.36						85.6341
14789@20201019_1_3409_iTRAQ.cmpd.rclb.mgf	51.98	539.98	3	0	-0.0037	1	2		TKLSYQLYSAR	NFQP	MOD:01485 T1;MOD:01485 K2	0	1401	Q2K7F3	Q2K7F3{2-12}	0.0001	0.0002	0.0003	Q2K7F3		47.6						63.2876
60378@20201019_1_3409_iTRAQ.cmpd.rclb.mgf	197.03	701.397	4	0	-0.0014	1	2	LIAK	MKEAGVSIIYWGGLHTEAGLIIR	QAAD	MOD:01485 M1;MOD:01485 K2	0	3055	Q2K502	Q2K502{211-233}	0.0001	0.0002	0.0003	Q2K502		41.9						49.1437
21804@20201019_1_3409_iTRAQ.cmpd.rclb.mgf	72.75	960.52	2	0	0.0009	0	2		TSINTNSSAQAALQTLR	NVNQ	MOD:01485 T1	0	5239	Q2KCF1	Q2KCF1{2-18}	0.0001	0.0002	0.0003	Q2KCF1		77		23.3683				157.253
29004@20201019_1_3409_iTRAQ.cmpd.rclb.mgf	94.2	647.663	3	1	-0.0137	0	2	QKSR	SGVAINGFEGGQMPIYR	RLPK	MOD:01485 S1	0	3053	Q2K9J7	Q2K9J7{42-58}	0.0001	0.0002	0.0003	Q2K9J7		26.47						73.0596
45667@20201019_1_3409_iTRAQ.cmpd.rclb.mgf	145.23	784.167	4	0	-0.0006	0	2	ELTK	NQIDQGADVIYAAAGATGLGVLQTAADNK	KLSI	MOD:01485 N1;MOD:01485 K29	0	2076	Q2KDS5	Q2KDS5{201-229}	0.0001	0.0002	0.0003	Q2KDS5		78.91						86.0365
42168@20201019_1_3409_iTRAQ.cmpd.rclb.mgf	134.48	565.294	4	0	-0.0011	0	2	GAAK	VDTAYSAMDSAIDVVGDIK	AKLV	MOD:01485 V1;MOD:01485 K19	0	5239	Q2KCF0	Q2KCF0{74-92}	0.0001	0.0002	0.0003	Q2KCF0		89.71						74.4123
45858@20201019_1_3409_iTRAQ.cmpd.rclb.mgf	145.8	586.803	4	0	-0.0012	0	2	GAAK	VDTAYTAMDSAIDVVDEIK	AKLV	MOD:01485 V1;MOD:01485 K19	0	5239	Q2K133	Q2K133{74-92}	0.0001	0.0002	0.0003	Q2K133		36.91						71.7095
49731@20201019_1_3409_iTRAQ.cmpd.rclb.mgf	158.83	750.651	4	0	0.0012	1	2	AWEK	LPSWFVYGTGDKNIPAAALGFMAER	AGSK	MOD:01485 L1;MOD:01485 K12	0	1676	Q2K6P0	Q2K6P0{198-222}	0.0001	0.0002	0.0003	Q2K6P0		38.08						92.5957
50441@20201019_1_3409_iTRAQ.cmpd.rclb.mgf	161.35	710.368	4	0	0.0044	0	2	EKFK	AAGFNPEAYTLYSYAAMQAIAGAAK	AAGS	MOD:01485 A1;MOD:01485 K25	0	3055	Q2K502	Q2K502{289-313}	0.0001	0.0002	0.0003	Q2K502		84.8						86.4521
59080@20201019_1_3409_iTRAQ.cmpd.rclb.mgf	191.08	696.14	4	0	-0.0005	0	2	ALRR	VVAAAISAGLPVPALTSALTYFDAYR	QGRG	MOD:01485 V1	0	2555	Q2K7E1	Q2K7E1{417-442}	0.0001	0.0002	0.0003	Q2K7E1		35.6						77.0981
5493@20201019_1_3409_iTRAQ.cmpd.rclb.mgf	24.47	696.354	3	0	0.018	0	2	KWQK	DTGETVTIQASHGGSGAQAR	SVID	MOD:01485 D1	0	5704	Q2K0P9	Q2K0P9{59-78}	0.0001	0.0002	0.0003	Q2K0P9		37.4						80.9089
22112@20201019_1_3409_iTRAQ.cmpd.rclb.mgf	73.67	559.342	2	0	0.0013	0	2		TAITDIIAR	EILD	MOD:01485 T1	0	10555	Q2K8W9	Q2K8W9{2-10}	0.0001	0.0002	0.0003	Q2K8W9		42.84						134.129
39043@20201019_1_3409_iTRAQ.cmpd.rclb.mgf	124.08	758.731	3	1	-0.021	0	2	EELK	IVEDMANEIVLQNSPVTTR	LMSV	MOD:01485 I1	0	1363	Q2K7T4	Q2K7T4{609-627}	0.0001	0.0002	0.0003	Q2K7T4		48.93						74.7733
42385@20201019_1_3409_iTRAQ.cmpd.rclb.mgf	135.32	809.684	4	0	0.001	1	2	DAFK	ATLNAGGITEVVNDAITPGDKDFSALTTR	IKSE	MOD:01485 A1;MOD:01485 K21	0	5167	Q2K5M7	Q2K5M7{181-209}	0.0001	0.0002	0.0003	Q2K5M7		33.75						84.0351
46205@20201019_1_3409_iTRAQ.cmpd.rclb.mgf	146.82	860.943	4	0	0.0045	1	2	GLER	GGYNIDQLFDTSPFSFQSGVTYVTPQRK	LKDV	MOD:01485 G1;MOD:01485 K28	0	7554	Q2K981	Q2K981{31-58}	0.0001	0.0002	0.0003	Q2K981		31.59						61.2369
27618@20201019_1_3409_iTRAQ.cmpd.rclb.mgf	89.9	545.016	4	0	0.0022	0	2	TGYK	GFDWGAWHDGDDAAIQK	EADG	MOD:01485 G1;MOD:01485 K17	0	3114	Q2K4M9	Q2K4M9{148-164}	0.0001	0.0002	0.0003	Q2K4M9		49.51						68.9475
15551@20201019_1_3409_iTRAQ.cmpd.rclb.mgf	54.32	551.795	4	0	-0.0012	1	2	PGEK	HGTREVFEQNVLAAGCK	ASGA	MOD:01214 C16;MOD:01485 H1;MOD:01485 K17	0	7138	Q2KCV8	Q2KCV8{175-191}	0.0001	0.0002	0.0003	Q2KCV8		27.6						45.6991
31094@20201019_1_3409_iTRAQ.cmpd.rclb.mgf	100.33	494.795	4	0	-0.0053	0	2	ETGR	GGSLSIIGFQNLTRPK	SFHL	MOD:01485 G1;MOD:01485 K16	0	7686	Q2K683	Q2K683{437-452}	0.0001	0.0002	0.0003	Q2K683		38.81						51.8292
48104@20201019_1_3409_iTRAQ.cmpd.rclb.mgf	152.75	530.3	2	0	0.0075	0	2	PEER	QLLTALFDR	VRTA	MOD:00040 Q1	0	3997	Q2K5P9	Q2K5P9{7-15}	0.0001	0.0002	0.0003	Q2K5P9		41.3						55.8769
44712@20201019_1_3409_iTRAQ.cmpd.rclb.mgf	142.32	694.875	4	0	0.009	0	2	AAAR	GETALGIVFMHDAVAQTAEGFPVK	SVAP	MOD:01485 G1;MOD:01485 K24	0	638	Q2K8C6	Q2K8C6{217-240}	0.0001	0.0002	0.0003	Q2K8C6		52.06						97.7864
25097@20201019_1_3409_iTRAQ.cmpd.rclb.mgf	82.5	537.551	4	0	0.0018	1	2	FLPK	GQLGALDENPYKLDVAR	AKEL	MOD:01485 G1;MOD:01485 K12	0	3376	Q2K350	Q2K350{352-368}	0.0001	0.0002	0.0003	Q2K350		45.03						98.4806
58436@20201019_1_3409_iTRAQ.cmpd.rclb.mgf	189.03	991.757	4	0	0.0025	0	2	DAIR	ELMAAVDSYIPTPERPVDQPFLMPIEDVFSISGR	GTVV	MOD:01485 E1	0	9836	Q2K9N2	Q2K9N2{188-221}	0.0001	0.0002	0.0003	Q2K9L8;Q2K9N2		44.35						98.0344
31989@20201019_1_3409_iTRAQ.cmpd.rclb.mgf	102.95	720.865	4	0	0.0065	0	2	EAIR	HGGQAASFATGAGFLAAGATGAGFAAGQSAR	AAGS	MOD:01485 H1	0	199	Q2K2Q7	Q2K2Q7{372-402}	0.0001	0.0002	0.0003	Q2K2Q7		66.11						80.0423
8584@20201019_1_3409_iTRAQ.cmpd.rclb.mgf	33.65	440.929	3	0	0.0005	0	2		TVTSASPEIK	IELH	MOD:01485 T1;MOD:01485 K10	0	3378	Q2K6N6	Q2K6N6{2-11}	0.0001	0.0002	0.0003	Q2K6N6		25.77						54.8042
24285@20201019_1_3409_iTRAQ.cmpd.rclb.mgf	80.12	499.776	4	0	-0.0002	1	2	DIQK	IKYEGPDSTNPLAFR	YYQP	MOD:01485 I1;MOD:01485 K2	0	5336	Q2K433	Q2K433{12-26}	0.0001	0.0002	0.0003	Q2K433		27.45						48.0028
33067@20201019_1_3409_iTRAQ.cmpd.rclb.mgf	106.1	843.93	4	1	-0.0085	0	2	ILSR	GTPNLENETWVESANVINGTDTPQVAAQK	LQKG	MOD:01485 G1;MOD:01485 K29	0	8161	Q2K670	Q2K670{378-406}	0.0001	0.0002	0.0003	Q2K670		29.62		29.3424				79.6705
57483@20201019_1_3409_iTRAQ.cmpd.rclb.mgf	184.7	1039.8	4	0	0.0086	0	2	QGLK	ATLVSGDGIVSNELASIAGDAVAGTLNTFGPDPTLNPANK	ELVE	MOD:01485 A1;MOD:01485 K40	0	3055	Q2K502	Q2K502{242-281}	0.0001	0.0002	0.0003	Q2K502		59.65						112.237
57588@20201019_1_3409_iTRAQ.cmpd.rclb.mgf	185.22	995.757	4	0	0.0061	0	2	DAIR	ELMAAVDSYIPTPERPVDQPFLMPIEDVFSISGR	GTVV	MOD:01485 E1;MOD:00719 M23	0	9836	Q2K9N2	Q2K9N2{188-221}	0.0001	0.0002	0.0003	Q2K9L8;Q2K9N2		44.63						99.2064
15332@20201019_1_3409_iTRAQ.cmpd.rclb.mgf	53.63	553.792	4	0	0.0032	1	2	WYKK	STGKDYTAEEDPGVISVR	EIYN	MOD:01485 S1;MOD:01485 Y6	0	10277	Q2K414	Q2K414{189-206}	0.0001	0.0002	0.0003	Q2K414		34.64						54.7526
42635@20201019_1_3409_iTRAQ.cmpd.rclb.mgf	136.03	953.492	4	0	0.0006	0	2	ELKK	DGNLTVQEQAGLNVGFLAYNTQMAPFDKPEVR	RALN	MOD:01485 D1;MOD:01485 K28	0	474	Q2KC86	Q2KC86{275-306}	0.0001	0.0002	0.0003	Q2KC86		27.91						83.7012
16556@20201019_1_3409_iTRAQ.cmpd.rclb.mgf	57.32	635.656	3	1	0.0175	0	2	AGVR	YVSENWTDTANTSK	NPSS	MOD:01485 Y1;MOD:01485 K14	0	2707	Q2JYH7	Q2JYH7{648-661}	0.0001	0.0002	0.0003	Q2JYH7		41.57						79.6591
30200@20201019_1_3409_iTRAQ.cmpd.rclb.mgf	97.72	558.312	4	0	0.001	0	2	AEQR	SEIVQNLEEGQVVDGVVK	NITD	MOD:01485 S1;MOD:01485 K18	0	4462	Q2KE13	Q2KE13{189-206}	0.0001	0.0002	0.0003	Q2KE13		40.26						82.8109
26202@20201019_1_3409_iTRAQ.cmpd.rclb.mgf	85.75	458.977	4	0	0.0067	0	2	MLPR	DIIAFGMDGDGDGHIR	LKQS	MOD:01485 D1	0	2517	Q2K699	Q2K699{205-220}	0.0001	0.0002	0.0003	Q2K699		34.49						42.2901
47618@20201019_1_3409_iTRAQ.cmpd.rclb.mgf	151.32	918.843	5	0	0.0043	0	2	GSDR	HTYGFGGQVFTGYNWQAGQIVYGVESDLGYSGDDVSSGGVK	NKYG	MOD:01485 H1;MOD:01485 K41	0	5698	Q2KA52	Q2KA52{68-108}	0.0001	0.0002	0.0003	Q2KA52		29.37						116.04
53935@20201019_1_3409_iTRAQ.cmpd.rclb.mgf	172.07	519.295	4	0	-0.0007	0	2	NPEK	MIADLEDVFILLHEK	KLSN	MOD:01485 M1;MOD:01485 K15	0	6161	Q2KBZ7	Q2KBZ7{211-225}	0.0001	0.0002	0.0003	Q2KBZ7		40.41						44.1565
21294@20201019_1_3409_iTRAQ.cmpd.rclb.mgf	71.27	1060.54	2	1	-0.0154	0	2	KAKK	INTSEEVAQVGTISANGER	QVGL	MOD:01485 I1	0	6161	Q2KBZ7	Q2KBZ7{138-156}	0.0001	0.0002	0.0003	Q2KBZ7		35.16						79.0281
48441@20201019_1_3409_iTRAQ.cmpd.rclb.mgf	153.75	710.368	4	0	0.0043	0	2	EKFK	AAGFNPEAYTLYSYAAMQAIAGAAK	AAGS	MOD:01485 A1;MOD:01485 K25	0	3055	Q2K502	Q2K502{289-313}	0.0001	0.0002	0.0003	Q2K502		24.75						89.7762
44759@20201019_1_3409_iTRAQ.cmpd.rclb.mgf	142.45	1000.56	3	0	-0.0058	0	2		TATAPWTTEKPTALLVLADGTVIEGR	GIGA	MOD:01485 T1;MOD:01485 K10	0	2259	Q2K612	Q2K612{2-27}	0.0001	0.0002	0.0003	Q2K612		28.22		27.1409				95.7316
25826@20201019_1_3409_iTRAQ.cmpd.rclb.mgf	84.63	579.811	4	0	0.0039	1	2	LLGR	LGVTVDFVDPSDHDEVRK	ALPG	MOD:01485 L1;MOD:01485 K18	0	7001	Q2JYI5	Q2JYI5{131-148}	0.0001	0.0002	0.0003	Q2JYI5		31.3						48.0934
57558@20201019_1_3409_iTRAQ.cmpd.rclb.mgf	185.07	1039.8	4	0	0.0086	0	2	QGLK	ATLVSGDGIVSNELASIAGDAVAGTLNTFGPDPTLNPANK	ELVE	MOD:01485 A1;MOD:01485 K40	0	3055	Q2K502	Q2K502{242-281}	0.0001	0.0002	0.0003	Q2K502		75.77						129.928
18603@20201019_1_3409_iTRAQ.cmpd.rclb.mgf	63.32	514.035	4	0	0.0013	0	2	VLSR	AFANVNYNKPTIAADR	GQKS	MOD:01485 A1;MOD:01485 K9	0	4663	Q2K2U2	Q2K2U2{60-75}	0.0001	0.0002	0.0003	Q2K2U2		45.33						75.1852
27678@20201019_1_3409_iTRAQ.cmpd.rclb.mgf	90.07	586.329	4	0	-0.0053	1	2	VNMR	AGPSTRYPAVAVIPAGSSVEIR	GCLS	MOD:01485 A1	0	2934	Q2KDW4	Q2KDW4{105-126}	0.0001	0.0002	0.0003	Q2KDW4		39.08		29.9556				58.7543
1468@20201019_1_3409_iTRAQ.cmpd.rclb.mgf	12.62	576.331	2	0	-0.0042	0	2		TDQSATIK	IGDK	MOD:01485 T1;MOD:01485 K8	0	1465	Q2K8X4	Q2K8X4{2-9}	0.0001	0.0002	0.0003	Q2K8X4		26.48						83.887
28520@20201019_1_3409_iTRAQ.cmpd.rclb.mgf	92.58	772.64	4	1	-0.0155	0	2	LFLR	QFGNTSVNGDPTATTNIAGTYGTFHVK	ADGS	MOD:01485 Q1;MOD:01485 K27	0	5138	Q2K591	Q2K591{154-180}	0.0001	0.0002	0.0003	Q2K591		41.98						86.62
21567@20201019_1_3409_iTRAQ.cmpd.rclb.mgf	72.07	472.004	4	0	0.0021	1	2	VYRR	HDGNIGWIDSANIKG		MOD:01485 H1;MOD:01485 K14	0	6535	Q2KD58	Q2KD58{198-212}	0.0001	0.0002	0.0003	Q2KD58		39.97						50.6542
51975@20201019_1_3409_iTRAQ.cmpd.rclb.mgf	165.98	1028.57	4	1	-0.0105	1	2	DGIR	FVVGPVTSGVAIPVSDVLAENGVLMVTPTATAPDLTKR	GLAN	MOD:01485 F1;MOD:01485 K37	0	5167	Q2K5M7	Q2K5M7{93-130}	0.0001	0.0002	0.0003	Q2K5M7		34.69		34.8888				81.7057
41216@20201019_1_3409_iTRAQ.cmpd.rclb.mgf	130.47	561.32	5	0	0.0014	1	2	LIAK	MKEAGVSIIYWGGLHTEAGLIIR	QAAD	MOD:01485 M1;MOD:01485 K2	0	3055	Q2K502	Q2K502{211-233}	0.0001	0.0002	0.0003	Q2K502		43.2						50.701
45988@20201019_1_3409_iTRAQ.cmpd.rclb.mgf	146.18	736.15	4	0	-0.0018	0	2	DVLK	DVPTAVEAGLPGFEVGIWHGIYTPK	GTPA	MOD:01485 D1;MOD:01485 K25	0	8013	Q2K4P7	Q2K4P7{235-259}	0.0001	0.0002	0.0003	Q2K4P7		57.24						111.492
54093@20201019_1_3409_iTRAQ.cmpd.rclb.mgf	172.53	814.915	4	0	0.0051	0	2	CRGR	TVFVADTAVHDMPTAEQLADIAEEAAGLAR	RMGY	MOD:01485 T1	0	902	Q2KD75	Q2KD75{599-628}	0.0001	0.0002	0.0003	Q2KD75		49.7						99.8831
44030@20201019_1_3409_iTRAQ.cmpd.rclb.mgf	140.3	742.618	4	0	0.0016	0	2	SVAK	DGQNLSYVFWFSSPSPSADAYVGGK	NSAS	MOD:01485 D1;MOD:01485 K25	0	5056	Q2JZ27	Q2JZ27{222-246}	0.0001	0.0002	0.0003	Q2JZ27		63.35						80.0184
31152@20201019_1_3409_iTRAQ.cmpd.rclb.mgf	100.48	837.675	4	0	0.0051	1	2	DLGR	QQVQAEFGDKIETPYLENVPEGPDAER	AIER	MOD:01485 Q1;MOD:01485 K10	0	10500	Q2K8G8	Q2K8G8{52-78}	0.0001	0.0002	0.0003	Q2K8G8		57.33						124.97
26444@20201019_1_3409_iTRAQ.cmpd.rclb.mgf	86.45	488.036	4	0	0.005	1	2	ALNR	IALGTQTVSVWKDSR	ELGK	MOD:01485 I1;MOD:01485 K12	0	10540	Q2K5E8	Q2K5E8{253-267}	0.0001	0.0002	0.0003	Q2K5E8		37.84						65.6455
48981@20201019_1_3409_iTRAQ.cmpd.rclb.mgf	155.33	702.893	4	0	0.0023	0	2	IKAR	GALTVGVILSGAPFGYIDPTSQTQK	GYNL	MOD:01485 G1;MOD:01485 K25	0	3711	Q2KA68	Q2KA68{24-48}	0.0001	0.0002	0.0003	Q2KA68		29.29						51.8978
42633@20201019_1_3409_iTRAQ.cmpd.rclb.mgf	136.03	911.203	4	0	-0.001	1	2	GNVK	VSDGTSDESKTNYGYTVGAGVEAFVTNNITTR	LEYR	MOD:01485 V1;MOD:01485 Y15	0	5698	Q2KA52	Q2KA52{143-174}	0.0001	0.0002	0.0003	Q2KA52		35.35						89.9128
57562@20201019_1_3409_iTRAQ.cmpd.rclb.mgf	185.1	642.353	4	0	0.0018	0	2	QGLK	APLDGAPYLYAAQTLVDWVSK	GYIS	MOD:01485 A1;MOD:01485 K21	0	898	Q2K239	Q2K239{224-244}	0.0001	0.0002	0.0003	Q2K239		28.05						69.5248
53639@20201019_1_3409_iTRAQ.cmpd.rclb.mgf	171.18	726.14	4	0	-0.0017	0	2	TFGR	VPTLSDVPFPVVMEPHLVVEFYSR		MOD:01485 V1	0	3170	Q2K7U4	Q2K7U4{182-205}	0.0001	0.0002	0.0003	Q2K7U4		41.72						90.3861
35615@20201019_1_3409_iTRAQ.cmpd.rclb.mgf	114.02	552.11	5	0	0.0046	0	2	SSLK	GVGYGTAAQPLPIVTGQDAEIPSVK	SIIA	MOD:01485 G1;MOD:01485 K25	0	5613	Q2K5F5	Q2K5F5{249-273}	0.0001	0.0002	0.0003	Q2K5F5		32.71						89.8812
14620@20201019_1_3409_iTRAQ.cmpd.rclb.mgf	51.48	664.023	3	0	0.0008	0	2		VQSLQLGASNQADDQK	GMRR	MOD:01485 V1;MOD:01485 K16	0	5305	Q2K2Q2	Q2K2Q2{2-17}	0.0001	0.0002	0.0003	Q2K2Q2		52.05						77.1616
31407@20201019_1_3409_iTRAQ.cmpd.rclb.mgf	101.23	639.329	4	0	0.0032	0	2	VPPK	CYLHHQASFIPSFFPEGTK	LGQD	MOD:01214 C1;MOD:01485 Y2;MOD:01485 K19	0	4702	Q2KCC4	Q2KCC4{299-317}	0.0001	0.0002	0.0003	Q2KCC4		41.09						78.2622
30535@20201019_1_3409_iTRAQ.cmpd.rclb.mgf	98.68	607.332	4	0	0.0031	1	2	GISK	ALAAEGADLAFTYQGDALGKR	VRPL	MOD:01485 A1;MOD:01485 K20	0	4575	Q2KE02	Q2KE02{28-48}	0.0001	0.0002	0.0003	Q2KE02		53.89						75.3607
26713@20201019_1_3409_iTRAQ.cmpd.rclb.mgf	87.25	519.799	4	0	-0.0007	2	2	EAAR	RKGDTSENLIGLLESR	LDAI	MOD:01485 R1;MOD:01485 K2	0	3170	Q2K7U4	Q2K7U4{80-95}	0.0001	0.0002	0.0003	Q2K7U4		32.79						54.7812
35500@20201019_1_3409_iTRAQ.cmpd.rclb.mgf	113.48	1017.99	4	0	-0.0098	1	2	QTLR	SINSNLETTQNSVSTGYRVDTASDNAAYWSIATTMR	SDNK	MOD:01485 S1	0	5239	Q2K133	Q2K133{19-54}	0.0001	0.0002	0.0003	Q2K133		77.61		34.0025				135.252
49662@20201019_1_3409_iTRAQ.cmpd.rclb.mgf	158.63	685.093	4	0	0.0103	0	2	FHVK	ADGSFTYDLTADLDAGVTYTEVLR	YYKI	MOD:01485 A1	0	201	Q2K1Q3	Q2K1Q3{184-207}	0.0001	0.0002	0.0003	Q2K1Q3		30.79						42.0716
1619@20201019_1_3409_iTRAQ.cmpd.rclb.mgf	13.08	424.47	4	0	0.0014	0	2	AVYR	VAHGGSHSQAPSLMR	QYFL	MOD:01485 V1;MOD:00719 M14	0	2254	Q2K5A4	Q2K5A4{217-231}	0.0001	0.0002	0.0003	Q2K5A4		27.95						51.4115
60247@20201019_1_3409_iTRAQ.cmpd.rclb.mgf	195.35	930.511	4	0	-0.0086	0	2	SGAK	NAALPLMIASLLTSDTLTLENVPHLADVELLMR	ILGN	MOD:01485 N1	0	5525	Q2KCP0	Q2KCP0{23-55}	0.0001	0.0002	0.0003	Q2KCP0		46.55		32.7089				89.9824
34833@20201019_1_3409_iTRAQ.cmpd.rclb.mgf	111.27	673.348	4	0	0.0029	0	2	SVGK	VAFVVSTEGGMDIEAVAHDTPEK	IQTI	MOD:01485 V1;MOD:01485 K23	0	1104	Q2K3F0	Q2K3F0{131-153}	0.0001	0.0002	0.0003	Q2K3F0		38.26						78.5396
50078@20201019_1_3409_iTRAQ.cmpd.rclb.mgf	159.85	646.114	4	0	0.0013	1	2	KVRR	IGKGDVIAGFAGATADAFTLLER	LEKK	MOD:01485 I1;MOD:01485 K3	0	1361	Q2KE55	Q2KE55{38-60}	0.0001	0.0002	0.0003	Q2KE55		26.06						63.5325
27526@20201019_1_3409_iTRAQ.cmpd.rclb.mgf	89.63	545.016	4	0	0.0021	0	2	TGYK	GFDWGAWHDGDDAAIQK	EADG	MOD:01485 G1;MOD:01485 K17	0	3114	Q2K4M9	Q2K4M9{148-164}	0.0001	0.0002	0.0003	Q2K4M9		37.15						69.1001
31274@20201019_1_3409_iTRAQ.cmpd.rclb.mgf	100.85	501.022	4	0	-0.0002	0	2	GIER	IYVHESLYDAFVEK	SVAW	MOD:01485 Y2;MOD:01485 K14	0	7686	Q2K683	Q2K683{269-282}	0.0001	0.0002	0.0003	Q2K683		30.47						45.1014
36280@20201019_1_3409_iTRAQ.cmpd.rclb.mgf	115.97	656.862	4	0	-0.0005	0	2	ADKK	VVVGYQTDALPSSVAIANGEFAK	KTGY	MOD:01485 V1;MOD:01485 K23	0	4710	Q2K163	Q2K163{30-52}	0.0001	0.0002	0.0003	Q2K163		55.31						80.3924
53092@20201019_1_3409_iTRAQ.cmpd.rclb.mgf	169.57	989.491	4	0	0.0164	0	2	LDGK	AGADMLIGAAGNDTYIVDDAGDVVTEGLNEGTDWIK	TALS	MOD:01485 A1;MOD:01485 K36	0	6947	Q2KC97	Q2KC97{592-627,1195-1230}	0.0001	0.0002	0.0003	Q2KC97		75.07						135.894
37502@20201019_1_3409_iTRAQ.cmpd.rclb.mgf	119.57	685.401	3	0	-0.0021	1	2		AVSANRLELLQIADAVAR	EKVI	MOD:01485 A1	0	7463	Q2KDZ3	Q2KDZ3{2-19}	0.0001	0.0002	0.0003	Q2KDZ3		63.96						108.043
36354@20201019_1_3409_iTRAQ.cmpd.rclb.mgf	116.18	849.437	2	0	0.0061	0	2	GQFR	QALNDFNTALQINPR	FFQA	MOD:00040 Q1	0	10005	Q2K473	Q2K473{88-102}	0.0001	0.0002	0.0003	Q2K473		50.57		27.0789				86.3428
19850@20201019_1_3409_iTRAQ.cmpd.rclb.mgf	66.97	634.827	4	0	-0.0026	1	2	AEAR	VAGAFADKTDAIHNAYADNQR	RLES	MOD:01485 V1;MOD:01485 K8	0	4429	Q2K7R6	Q2K7R6{1147-1167}	0.0001	0.0002	0.0003	Q2K7R6		34.18						68.3363
42637@20201019_1_3409_iTRAQ.cmpd.rclb.mgf	136.07	645.367	3	0	-0.006	0	2		TSILTNVAAMAALQTLR	GIND	MOD:01485 T1;MOD:00719 M10	0	5239	Q2KCE9	Q2KCE9{2-18}	0.0001	0.0002	0.0003	Q2KCE9		51.34						88.5101
31279@20201019_1_3409_iTRAQ.cmpd.rclb.mgf	100.87	593.303	5	0	0.0025	0	2	VVKK	SFGTNAGLFNNAAQHYNHIHFWK	WMKK	MOD:01485 S1;MOD:01485 K23	0	3834	Q2KAX8	Q2KAX8{60-82}	0.0001	0.0002	0.0003	Q2KAX8		50.9						93.2594
23291@20201019_1_3409_iTRAQ.cmpd.rclb.mgf	77.15	507.553	4	0	-0.0036	1	2	YGDK	QAPIAIAINTNEVTKR	IHAG	MOD:01485 Q1;MOD:01485 K15	0	7015	Q2K5U4	Q2K5U4{39-54}	0.0001	0.0002	0.0003	Q2K5U4		45.32						48.5894
26508@20201019_1_3409_iTRAQ.cmpd.rclb.mgf	86.63	565.322	4	0	-0.0047	1	2	LQER	IEELRQQALDTDLAVQK	FRSE	MOD:01485 I1;MOD:01485 K17	0	1713	Q2K589	Q2K589{227-243}	0.0001	0.0002	0.0003	Q2K589		30.57						51.2747
48733@20201019_1_3409_iTRAQ.cmpd.rclb.mgf	154.6	581.331	4	0	-0.0026	0	2	LTAK	NIPAEAFTLNAYAAVEVLK	AGIE	MOD:01485 N1;MOD:01485 K19	0	5167	Q2K5M7	Q2K5M7{290-308}	0.0001	0.0002	0.0003	Q2K5M7		54.92						68.4371
6793@20201019_1_3409_iTRAQ.cmpd.rclb.mgf	28.35	542.949	3	1	-0.0096	0	2	SSLK	DLGTSSEAAAPAHVR	KVDS	MOD:01485 D1	0	3545	Q2K9W4	Q2K9W4{9-23}	0.0001	0.0002	0.0003	Q2K9W4		48.99						73.4957
41039@20201019_1_3409_iTRAQ.cmpd.rclb.mgf	129.95	607.817	4	0	0.0009	0	2	RQMK	DMAIVGNIGHFDNEIEVAALR	NLKW	MOD:01485 D1	0	128	Q2KE72	Q2KE72{328-348}	0.0001	0.0002	0.0003	Q2KE72		67.78						97.6229
48583@20201019_1_3409_iTRAQ.cmpd.rclb.mgf	154.17	581.332	4	0	0.0006	0	2	LTAK	NIPAEAFTLNAYAAVEVLK	AGIE	MOD:01485 N1;MOD:01485 K19	0	5167	Q2K5M7	Q2K5M7{290-308}	0.0001	0.0002	0.0003	Q2K5M7		59.35						81.484
31731@20201019_1_3409_iTRAQ.cmpd.rclb.mgf	102.2	559.295	5	0	0.004	0	2	QEAK	IVPIVEPECLMDGKPGDHNIDR	CAEV	MOD:01214 C9;MOD:01485 I1;MOD:01485 K14	0	4233	Q2K4I0	Q2K4I0{172-193}	0.0001	0.0002	0.0003	Q2K4I0		29.27						65.1625
59847@20201019_1_3409_iTRAQ.cmpd.rclb.mgf	193.63	742.897	6	0	0.0045	1	2	LVGR	ADAIYIPTDNTIISALEGAVAVAEESKLPLFTADTDSVSR	GSIA	MOD:01485 A1;MOD:01485 K27	0	5726	Q2K3B2	Q2K3B2{208-247}	0.0001	0.0002	0.0003	Q2K3B2		34.09						63.2982
19881@20201019_1_3409_iTRAQ.cmpd.rclb.mgf	67.05	633.073	4	0	-0.0037	0	2	EDIR	IYVNSPGGHVESGDSIHDMVK	FIKP	MOD:01485 I1;MOD:01485 K21	0	6814	Q2K5Q0	Q2K5Q0{60-80}	0.0001	0.0002	0.0003	Q2K5Q0		66.88						95.4704
6297@20201019_1_3409_iTRAQ.cmpd.rclb.mgf	26.88	521.274	4	0	0.0085	1	2	NAVK	TATATGADTSGALDEREK	VLKQ	MOD:01485 T1;MOD:01485 K18	0	3383	Q2KCE0	Q2KCE0{179-196}	0.0001	0.0002	0.0003	Q2KCE0		63.36						56.4067
38523@20201019_1_3409_iTRAQ.cmpd.rclb.mgf	122.55	652.588	4	0	0.0026	0	2	VLPR	EGIYATATQEIAGLGGDSQFYK	IYGK	MOD:01485 E1;MOD:01485 K22	0	2957	Q2K8Y0	Q2K8Y0{591-612}	0.0001	0.0002	0.0003	Q2K8Y0		67.55						72.6684
60475@20201019_1_3409_iTRAQ.cmpd.rclb.mgf	205.07	701.396	4	0	-0.0036	1	2	LIAK	MKEAGVSIIYWGGLHTEAGLIIR	QAAD	MOD:01485 M1;MOD:01485 K2	0	3055	Q2K502	Q2K502{211-233}	0.0001	0.0002	0.0003	Q2K502		42.63						77.754
40062@20201019_1_3409_iTRAQ.cmpd.rclb.mgf	127.07	723.661	4	1	-0.0068	0	2	PTRR	WTPYLGAGIGVNIPHVEVIRPEGK	TWAY	MOD:01485 W1;MOD:01485 K24	0	2979	Q2KC13	Q2KC13{136-159}	0.0001	0.0002	0.0003	Q2KC13		64.81		27.3753				86.2527
44831@20201019_1_3409_iTRAQ.cmpd.rclb.mgf	142.67	767.008	5	0	-0.0192	0	2	DGVK	FVIGHFNSGVSIPASEVYAENGILEITPAATNPK	FTER	MOD:01485 F1;MOD:01485 K34	0	3055	Q2K502	Q2K502{94-127}	0.0001	0.0002	0.0003	Q2K502		31.89		36.1001				66.4323
4355@20201019_1_3409_iTRAQ.cmpd.rclb.mgf	21.17	365.201	4	0	0.0029	0	2		ASTNFRPLHDR	VVVR	MOD:01485 A1	0	2834	Q2KBZ6	Q2KBZ6{2-12}	0.0001	0.0002	0.0003	Q2KBZ6		36.21						47.8078
56410@20201019_1_3409_iTRAQ.cmpd.rclb.mgf	180.67	580.573	4	0	0.0039	0	2	WCAR	EIVGDEPFALLLPDMIMK	GDKG	MOD:01485 E1;MOD:01485 K18	0	7180	Q2K4B9	Q2K4B9{123-140}	0.0001	0.0002	0.0003	Q2K4B9		60.15						79.2364
59514@20201019_1_3409_iTRAQ.cmpd.rclb.mgf	192.58	753.426	4	0	-0.0027	0	2	RMRK	FFEEVALLSQSFVINPDLTVAAAIK	EAEK	MOD:01485 F1;MOD:01485 K25	0	6902	Q2K8Y6	Q2K8Y6{243-267}	0.0001	0.0002	0.0003	Q2K8Y6		55.76						93.3709
27698@20201019_1_3409_iTRAQ.cmpd.rclb.mgf	90.12	772.394	4	0	0.0037	0	2	LFLR	QFGNTSVNGDPTATTNIAGTYGTFHVK	ADGS	MOD:01485 Q1;MOD:01485 K27	0	5138	Q2K591	Q2K591{154-180}	0.0001	0.0002	0.0003	Q2K591		109.15						100.599
2013@20201019_1_3409_iTRAQ.cmpd.rclb.mgf	14.23	451.249	2	0	0.0003	0	2	GEPK	QGVSAANK	VVGD	MOD:00040 Q1;MOD:01485 K8	0	5167	Q2K5M7	Q2K5M7{78-85}	0.0001	0.0002	0.0003	Q2K5M7		37.78						84.389
5583@20201019_1_3409_iTRAQ.cmpd.rclb.mgf	24.73	608.571	4	0	0.0115	0	2	PAPR	IHQPGGQANQRPQQSYQPPR	ANDR	MOD:01485 I1	0	3724	Q2KDZ5	Q2KDZ5{92-111}	0.0001	0.0002	0.0003	Q2KDZ5		27.96						46.4827
36851@20201019_1_3409_iTRAQ.cmpd.rclb.mgf	117.65	694.124	4	0	0.0017	1	2	QTLK	TANPSVPVMTLDADLAAEDSALRK	TYLG	MOD:01485 T1;MOD:01485 K24	0	321	Q2K5C9	Q2K5C9{106-129}	0.0001	0.0002	0.0003	Q2K5C9		38.89						39.6282
37330@20201019_1_3409_iTRAQ.cmpd.rclb.mgf	119.05	750.683	4	0	-0.0024	0	2	LVDR	VIGTGTVKPVEEVYIQPQVEGLSIR	TLKA	MOD:01485 V1;MOD:01485 Y14	0	3306	Q2K524	Q2K524{55-79}	0.0001	0.0002	0.0003	Q2K524		39.43						89.7833
21967@20201019_1_3409_iTRAQ.cmpd.rclb.mgf	73.23	560.316	4	0	0.0046	0	2	GQMK	ALQVGHEIAAQQVAQMQK	LRGL	MOD:01485 A1;MOD:01485 K18	0	478	Q2K2Q6	Q2K2Q6{199-216}	0.0001	0.0002	0.0003	Q2K2Q6		80.82						64.8981
45387@20201019_1_3409_iTRAQ.cmpd.rclb.mgf	144.42	674.108	4	0	0.0035	0	2	IFYR	EAGPADAPVVLLLHGFPTSSHMFR	NLIP	MOD:01485 E1	0	14	Q2K0G7	Q2K0G7{54-77}	0.0001	0.0002	0.0003	Q2K0G7		48.09						60.6228
23799@20201019_1_3409_iTRAQ.cmpd.rclb.mgf	78.63	561.547	4	0	0.0017	1	2	KNEK	YVDGGVAAVASTDFRDSPK	GLFA	MOD:01485 Y1;MOD:01485 K19	0	4702	Q2KCC4	Q2KCC4{272-290}	0.0001	0.0002	0.0003	Q2KCC4		54.34						101.029
59341@20201019_1_3409_iTRAQ.cmpd.rclb.mgf	191.83	878.22	4	0	-0.0035	0	2	NINK	GNIQPLPIAVTDFLQGDMGAQVSQVIAADLQR	SGLF	MOD:01485 G1	0	9537	Q2K4L8	Q2K4L8{37-68}	0.0001	0.0002	0.0003	Q2K4L8		49.69		28.8236				85.0082
52508@20201019_1_3409_iTRAQ.cmpd.rclb.mgf	167.67	553.56	4	0	0.004	0	2	FASR	GFNPVVAVSFAWTSAIEK	VAAE	MOD:01485 G1;MOD:01485 K18	0	2076	Q2KDS5	Q2KDS5{80-97}	0.0001	0.0002	0.0003	Q2KDS5		66.75						75.4524
30463@20201019_1_3409_iTRAQ.cmpd.rclb.mgf	98.47	938.001	2	0	0.0019	1	2		SERLEDIAVQMVAGGR	GLLA	MOD:01485 S1	0	4233	Q2K4I0	Q2K4I0{2-17}	0.0001	0.0002	0.0003	Q2K4I0		74.75						160.081
22575@20201019_1_3409_iTRAQ.cmpd.rclb.mgf	75	599.57	4	0	0.0025	0	2	GDPR	TANQAVQGVYAAGLSASGGDAAK	AGEE	MOD:01485 T1;MOD:01485 K23	0	2394	Q2K678	Q2K678{181-203}	0.0001	0.0002	0.0003	Q2K678		100.36						87.1242
36372@20201019_1_3409_iTRAQ.cmpd.rclb.mgf	116.23	667.941	5	0	0.0027	0	2	DVVK	QVGGDLVDVTSLVGPNGDPHEFEPSPADAK	NLKA	MOD:01485 Q1;MOD:01485 K30	0	10479	Q2KBK4	Q2KBK4{43-72}	0.0001	0.0002	0.0003	Q2KBK4		62.69						98.2519
46018@20201019_1_3409_iTRAQ.cmpd.rclb.mgf	146.27	720.895	4	0	0.0018	0	2	NFGK	IATESGAELVGTDGFDQSIQLVLTK	RADA	MOD:01485 I1;MOD:01485 K25	0	4137	Q2K336	Q2K336{155-179}	0.0001	0.0002	0.0003	Q2K336		59.28						110.803
59734@20201019_1_3409_iTRAQ.cmpd.rclb.mgf	193.3	860.942	4	0	0.0152	0	2	EISR	QVATDIMIIEDEPLIAMDIEQMVESLGHR	VTGI	MOD:01485 Q1	0	2718	Q2K547	Q2K547{137-165}	0.0001	0.0002	0.0003	Q2K547		82.04						85.6927
35746@20201019_1_3409_iTRAQ.cmpd.rclb.mgf	114.4	726.618	4	0	-0.0034	0	2	PITK	ADGSEGAATGATLTDAQIVAMDWHVK	GVTT	MOD:01485 A1;MOD:01485 K26	0	3307	Q2K1D3	Q2K1D3{333-358}	0.0001	0.0002	0.0003	Q2K1D3		77.29						89.8655
38965@20201019_1_3409_iTRAQ.cmpd.rclb.mgf	123.85	500.287	4	0	-0.0017	0	2	FFGK	IPEVAEMPNLIEVQK	ASYD	MOD:01485 I1;MOD:01485 K15	0	4923	Q2K9M4	Q2K9M4{20-34}	0.0001	0.0002	0.0003	Q2K9M4		44.65						57.4692
21475@20201019_1_3409_iTRAQ.cmpd.rclb.mgf	71.8	402.476	4	0	0.0037	0	2	NIEK	ALSAADPADAAAFK	ANAE	MOD:01485 A1;MOD:01485 K14	0	10479	Q2KBK4	Q2KBK4{145-158}	0.0001	0.0002	0.0003	Q2KBK4		56.65						60.2011
23601@20201019_1_3409_iTRAQ.cmpd.rclb.mgf	78.05	641.011	3	1	-0.0139	0	2		TSINTNSSAQAALQTLR	NVNQ	MOD:01485 T1	0	5239	Q2KCF1	Q2KCF1{2-18}	0.0001	0.0002	0.0003	Q2KCF1		64						78.0858
36428@20201019_1_3409_iTRAQ.cmpd.rclb.mgf	116.4	655.114	4	1	-0.0161	0	2	SAGR	TAVGSFNGAFATVPAHELGAAVIK	GALA	MOD:01485 T1;MOD:01485 K24	0	8991	Q2K324	Q2K324{14-37}	0.0001	0.0002	0.0003	Q2K324		39.12						89.4961
44681@20201019_1_3409_iTRAQ.cmpd.rclb.mgf	142.22	719.141	4	0	0.0182	0	2	PPHR	LVFTHAWETGAGETSPETIVTITLR	ESDG	MOD:01485 L1	0	10269	Q2KBA3	Q2KBA3{88-112}	0.0001	0.0002	0.0003	Q2KBA3		32.13						67.8562
60388@20201019_1_3409_iTRAQ.cmpd.rclb.mgf	197.28	772.818	5	0	-0.0018	0	2	IKAK	AFADVGTIAEETAAAVVEQLIGSTAAQADVAAAVAAAK	KEV	MOD:01485 A1;MOD:01485 K38	0	560	Q2KBV9	Q2KBV9{167-204}	0.0001	0.0002	0.0003	Q2KBV9		42.11						101.509
20435@20201019_1_3409_iTRAQ.cmpd.rclb.mgf	68.68	549.29	4	0	0.0042	1	2	VAVR	KDGAAVDIDGDYPETLAR	IAAN	MOD:01485 K1;MOD:01485 K1	0	7138	Q2KCV8	Q2KCV8{218-235}	0.0001	0.0002	0.0003	Q2KCV8		30.87						61.3766
35745@20201019_1_3409_iTRAQ.cmpd.rclb.mgf	114.4	726.619	4	0	-0.0025	0	2	PITK	ADGSEGAATGATLTDAQIVAMDWHVK	GVTT	MOD:01485 A1;MOD:01485 K26	0	3307	Q2K1D3	Q2K1D3{333-358}	0.0001	0.0002	0.0003	Q2K1D3		32.38						71.4725
57544@20201019_1_3409_iTRAQ.cmpd.rclb.mgf	185	693.538	6	0	0.0125	0	2	QGLK	ATLVSGDGIVSNELASIAGDAVAGTLNTFGPDPTLNPANK	ELVE	MOD:01485 A1;MOD:01485 K40	0	3055	Q2K502	Q2K502{242-281}	0.0001	0.0002	0.0003	Q2K502		41.65						81.4121
26480@20201019_1_3409_iTRAQ.cmpd.rclb.mgf	86.55	545.292	4	0	0.0042	1	2	EAQR	FVSIYDEYSKAPDVTR	ERLF	MOD:01485 F1;MOD:01485 K10	0	6225	Q2K6H0	Q2K6H0{300-315}	0.0001	0.0002	0.0003	Q2K6H0		48.81						73.0197
32323@20201019_1_3409_iTRAQ.cmpd.rclb.mgf	103.92	1207.61	2	0	0.0029	0	2	VFIK	GSSSDPNADFLFSGQQEVLK	AAID	MOD:01485 G1;MOD:01485 K20	0	10540	Q2K5E8	Q2K5E8{153-172}	0.0001	0.0002	0.0003	Q2K5E8		78.99						143.897
57316@20201019_1_3409_iTRAQ.cmpd.rclb.mgf	184.03	783.193	4	0	0.0071	0	2	MAER	AAPILDGGNVFMAVGALHLPGQGGVIELLR	KQGF	MOD:01485 A1	0	3395	Q2K3G0	Q2K3G0{320-349}	0.0001	0.0002	0.0003	Q2K3G0		26.14						46.8963
10666@20201019_1_3409_iTRAQ.cmpd.rclb.mgf	39.9	560.846	2	0	-0.005	0	2		ATASEILK	QIQE	MOD:01485 A1;MOD:01485 K8	0	4729	Q2K8F0	Q2K8F0{2-9}	0.0001	0.0002	0.0003	Q2K8F0		53.48						118.29
48165@20201019_1_3409_iTRAQ.cmpd.rclb.mgf	152.93	598.62	4	0	0.0025	0	2	DDLR	ILEITPLTKPADIIAEIPR	TVAV	MOD:01485 I1;MOD:01485 K9	0	6260	Q2K7N7	Q2K7N7{10-28}	0.0001	0.0002	0.0003	Q2K7N7		35.1						80.5517
12240@20201019_1_3409_iTRAQ.cmpd.rclb.mgf	44.53	560.275	4	0	0.0005	0	2	LVSR	DFNHDSHSSIFATDQTK	VMEG	MOD:01485 D1;MOD:01485 K17	0	9080	Q2K4I4	Q2K4I4{286-302}	0.0001	0.0002	0.0003	Q2K4I4		35.3						65.9504
46378@20201019_1_3409_iTRAQ.cmpd.rclb.mgf	147.33	752.398	4	0	0.0001	0	2	ADGK	MAQLNQQPLGTGPFTFVAYQPDAVIR	YKAN	MOD:01485 M1	0	474	Q2KC86	Q2KC86{196-221}	0.0001	0.0002	0.0003	Q2KC86		29.96						66.6943
37380@20201019_1_3409_iTRAQ.cmpd.rclb.mgf	119.2	620.831	4	0	0.0039	0	2	DFLK	SPIAHEVWMAQSSFLTPYK	GVST	MOD:01485 S1;MOD:01485 K19	0	4702	Q2KCC4	Q2KCC4{365-383}	0.0001	0.0002	0.0003	Q2KCC4		35.43						53.2997
59397@20201019_1_3409_iTRAQ.cmpd.rclb.mgf	192.2	1037.58	3	0	0.0068	0	2	AAEK	GIVVTNTPDVLNDEVADTTIGLLLNTIR	ELPR	MOD:01485 G1	0	1900	Q2K460	Q2K460{87-114}	0.0001	0.0002	0.0003	Q2K460		69.18						134.949
27729@20201019_1_3409_iTRAQ.cmpd.rclb.mgf	90.22	751.366	4	0	0.004	0	2	DAAK	AMVDQGVDVLTQHTDTTAPMQVAEER	GIHA	MOD:01485 A1;MOD:00719 M20	0	10500	Q2K8G8	Q2K8G8{204-229}	0.0001	0.0002	0.0003	Q2K8G8		76.19						117.206
30317@20201019_1_3409_iTRAQ.cmpd.rclb.mgf	98.05	563.562	4	0	0.0059	0	2	KSEK	VDIVYFGGYHPEGGLLAR	QLHD	MOD:01485 V1;MOD:01485 Y9	0	5167	Q2K5M7	Q2K5M7{215-232}	0.0001	0.0002	0.0003	Q2K5M7		26.05						65.6037
36765@20201019_1_3409_iTRAQ.cmpd.rclb.mgf	117.4	799.466	3	0	0.0138	0	2	AYIK	AIGQAGIVIAGAGLTSPETGTIVR	RKGE	MOD:01485 A1	0	2588	Q2K4H0	Q2K4H0{32-55}	0.0001	0.0002	0.0003	Q2K4H0		32.86						98.4938
12954@20201019_1_3409_iTRAQ.cmpd.rclb.mgf	46.62	475.004	4	0	0.0045	0	2	MDIK	VVSETITTHDYESK	VLAP	MOD:01485 V1;MOD:01485 K14	0	10603	Q2K1V1	Q2K1V1{67-80}	0.0001	0.0002	0.0003	Q2K1V1		57.3						57.4245
22076@20201019_1_3409_iTRAQ.cmpd.rclb.mgf	73.55	471.5	4	0	0.0054	0	2	PLAR	HVAENFNEIHLPYR	TYRA	MOD:01485 H1	0	4484	Q2KC04	Q2KC04{143-156}	0.0001	0.0002	0.0003	Q2KC04		32.49						62.74
50488@20201019_1_3409_iTRAQ.cmpd.rclb.mgf	161.6	721.382	3	0	-0.0163	0	2	ALPK	SLIVMGSGAIGIEFASFYR	SMGV	MOD:01485 S1	0	7963	O05940	O05940{190-208}	0.0001	0.0002	0.0003	O05940		28.19						77.1333
48373@20201019_1_3409_iTRAQ.cmpd.rclb.mgf	153.55	526.323	4	0	-0.0006	0	2	EGGK	ISAHLLIPGFVFTGLTK	GDRA	MOD:01485 I1;MOD:01485 K17	0	377	Q2K3B6	Q2K3B6{195-211}	0.0001	0.0002	0.0003	Q2K3B6		45.91						57.1355
17592@20201019_1_3409_iTRAQ.cmpd.rclb.mgf	60.37	546.541	4	0	0.0033	0	2	AMDR	IFILHADHEQNASTSTVR	LAGS	MOD:01485 I1	0	1465	Q2K8X4	Q2K8X4{223-240}	0.0001	0.0002	0.0003	Q2K8X4		50.16						95.9369
28929@20201019_1_3409_iTRAQ.cmpd.rclb.mgf	93.97	751.367	4	0	0.0068	0	2	DAAK	AMVDQGVDVLTQHTDTTAPMQVAEER	GIHA	MOD:01485 A1;MOD:00719 M2	0	10500	Q2K8G8	Q2K8G8{204-229}	0.0001	0.0002	0.0003	Q2K8G8		39.4						108.199
43453@20201019_1_3409_iTRAQ.cmpd.rclb.mgf	138.6	610.313	4	0	0.002	0	2	LGGK	AAYFGNVAADQLGDIFTHDIR	AQGV	MOD:01485 A1	0	6438	Q2KDX6	Q2KDX6{75-95}	0.0001	0.0002	0.0003	Q2KDX6		33.83						71.6141
44040@20201019_1_3409_iTRAQ.cmpd.rclb.mgf	140.33	1173.58	2	0	0.0141	0	2	ALAR	TVGWIAQWNEMIEDPEQR	IGRP	MOD:01485 T1	0	1465	Q2K8X4	Q2K8X4{390-407}	0.0001	0.0002	0.0003	Q2K8X4		26.15						78.955
15150@20201019_1_3409_iTRAQ.cmpd.rclb.mgf	53.08	452.994	4	0	0.0066	0	2	VETK	AGAGIGADDAAYAAAGAK	IAAS	MOD:01485 A1;MOD:01485 K18	0	8071	Q2K9C1	Q2K9C1{39-56}	0.0001	0.0002	0.0003	Q2K9C1		67.38						61.5066
6974@20201019_1_3409_iTRAQ.cmpd.rclb.mgf	28.92	752.743	3	0	0.0125	0	2	APVR	AAEPAPAPAQARPQQSTPAPR	IHQP	MOD:01485 A1	0	3724	Q2KDZ5	Q2KDZ5{71-91}	0.0001	0.0002	0.0003	Q2KDZ5		42.32						97.6062
39655@20201019_1_3409_iTRAQ.cmpd.rclb.mgf	125.88	606.083	4	0	-0.0009	1	2	LWGK	IDFLVHAIGFSDKDELTGR	YIDT	MOD:01485 I1;MOD:01485 K13	0	9571	Q2KBN7	Q2KBN7{89-107}	0.0001	0.0002	0.0003	Q2KBN7		35.75						89.8486
45972@20201019_1_3409_iTRAQ.cmpd.rclb.mgf	146.13	958.759	4	1	-0.0177	0	2	DGVK	FVIGHFNSGVSIPASEVYAENGILEITPAATNPK	FTER	MOD:01485 F1;MOD:01485 K34	0	3055	Q2K502	Q2K502{94-127}	0.0001	0.0002	0.0003	Q2K502		35.1						100.88
18738@20201019_1_3409_iTRAQ.cmpd.rclb.mgf	63.72	618.055	4	0	0.0042	0	2	GEGR	TVNVEYVSANPTGPMHVGHCR	GAVV	MOD:01214 C20;MOD:01485 T1	0	5854	Q2K975	Q2K975{123-143}	0.0001	0.0002	0.0003	Q2K975		56.28						83.0152
59296@20201019_1_3409_iTRAQ.cmpd.rclb.mgf	191.72	763.162	4	0	-0.0011	0	2	LVGR	ADAIYIPTDNTIISALEGAVAVAEESK	LPLF	MOD:01485 A1;MOD:01485 K27	0	5726	Q2K3B2	Q2K3B2{208-234}	0.0001	0.0002	0.0003	Q2K3B2		29.5						107.939
42260@20201019_1_3409_iTRAQ.cmpd.rclb.mgf	134.78	809.684	4	0	0.0009	1	2	DAFK	ATLNAGGITEVVNDAITPGDKDFSALTTR	IKSE	MOD:01485 A1;MOD:01485 K21	0	5167	Q2K5M7	Q2K5M7{181-209}	0.0001	0.0002	0.0003	Q2K5M7		26.21						106.116
56898@20201019_1_3409_iTRAQ.cmpd.rclb.mgf	182.48	877.219	4	0	0.004	1	2	SALR	RLEQLTAEASQQPMHEVIGEAVDLIVSIER	TPRG	MOD:01485 R1	0	3309	Q2K2R0	Q2K2R0{258-287}	0.0001	0.0002	0.0003	Q2K2R0		40.6						117.749
12134@20201019_1_3409_iTRAQ.cmpd.rclb.mgf	44.22	413.482	4	0	0.0066	0	2	NVLR	WADAIHSRPAVQR	GRMV	MOD:01485 W1	0	8749	Q2K220	Q2K220{243-255}	0.0001	0.0002	0.0003	Q2K220		39.26						68.5096
41524@20201019_1_3409_iTRAQ.cmpd.rclb.mgf	131.37	655.113	4	0	0.0013	1	2	TKVK	FTPLSAANRFPALQSGEIDVLAR	NTTW	MOD:01485 F1	0	6573	Q2K902	Q2K902{87-109}	0.0001	0.0002	0.0003	Q2K902		41.28						88.7028
42296@20201019_1_3409_iTRAQ.cmpd.rclb.mgf	134.95	809.684	4	0	0.0009	1	2	DAFK	ATLNAGGITEVVNDAITPGDKDFSALTTR	IKSE	MOD:01485 A1;MOD:01485 K21	0	5167	Q2K5M7	Q2K5M7{181-209}	0.0001	0.0002	0.0003	Q2K5M7		38.1						103.31
33998@20201019_1_3409_iTRAQ.cmpd.rclb.mgf	108.82	794.931	4	0	0.008	1	2	GVKK	AQAELPDYQLELKYPEQASVAIQQR	LMED	MOD:01485 A1;MOD:01485 K13	0	3891	Q2JZ78	Q2JZ78{54-78}	0.0001	0.0002	0.0003	Q2JZ78		51.96						67.6783
31558@20201019_1_3409_iTRAQ.cmpd.rclb.mgf	101.68	629.332	4	0	0.0043	0	2	QGVK	ADAVAAGASAAAADEALAGAEIDPK	VLSR	MOD:01485 A1;MOD:01485 K25	0	2517	Q2K699	Q2K699{51-75}	0.0001	0.0002	0.0003	Q2K699		79.67						97.2084
44822@20201019_1_3409_iTRAQ.cmpd.rclb.mgf	142.63	661.831	4	0	0.0011	1	2	ELAR	DRNPDAALGDFIADPLPPMDFGR	IAAQ	MOD:01485 D1	0	7463	Q2KDZ3	Q2KDZ3{87-109}	0.0001	0.0002	0.0003	Q2KDZ3		28.6						42.6109
20827@20201019_1_3409_iTRAQ.cmpd.rclb.mgf	69.85	625.567	4	1	-0.0163	2	2	PAAK	ASNGGPVADFDRDEELKAYR	EMLL	MOD:01485 A1;MOD:01485 Y19	0	9921	Q2K8W7	Q2K8W7{22-41}	0.0001	0.0002	0.0003	Q2K8W7		50.28						33.9515
13725@20201019_1_3409_iTRAQ.cmpd.rclb.mgf	48.88	455.009	4	1	0.0035	0	2	QIGR	HCAIVSQVGIAGSTK	IGNG	MOD:01214 C2;MOD:01485 H1;MOD:01485 K15	0	1471	Q2K8X9	Q2K8X9{264-278}	0.0001	0.0002	0.0003	Q2K8X9		30.43						54.1955
39819@20201019_1_3409_iTRAQ.cmpd.rclb.mgf	126.35	733.148	4	0	-0.0119	0	2	IKER	MSSIEIDTVMPQDLINAKPAAAAVR	EFFG	MOD:01485 M1;MOD:01485 K18	0	4923	Q2K9M4	Q2K9M4{489-513}	0.0001	0.0002	0.0003	Q2K9M4		30.18		34.6315				74.8056
35087@20201019_1_3409_iTRAQ.cmpd.rclb.mgf	112.02	572.316	5	0	0.0023	0	2	GIAR	HLVNLEVVNTYEGTHDIHALIIGR	SITG	MOD:01485 H1	0	9367	Q2K0R4	Q2K0R4{362-385}	0.0001	0.0002	0.0003	Q2K0R4		39.42						51.2063
60326@20201019_1_3409_iTRAQ.cmpd.rclb.mgf	195.88	1046	4	0	0.0034	0	2	PAVR	QGDDQWFDIVSWVGYAMINAEEFGITQANVDDMK	NSPN	MOD:01485 Q1;MOD:01485 K34	0	6573	Q2K902	Q2K902{239-272}	0.0001	0.0002	0.0003	Q2K902		56.52						95.2907
36329@20201019_1_3409_iTRAQ.cmpd.rclb.mgf	116.1	817.172	4	0	0.003	1	2	RAAK	ADIQVFQNMTGTTGAAWNDPVRGGELTK	NQID	MOD:01485 A1;MOD:01485 K28	0	2076	Q2KDS5	Q2KDS5{173-200}	0.0001	0.0002	0.0003	Q2KDS5		53.92						90.3357
26382@20201019_1_3409_iTRAQ.cmpd.rclb.mgf	86.27	448.763	4	0	0.0008	0	2	PAKR	QAVTNPTNTLFAVK	RLIG	MOD:01485 Q1;MOD:01485 K14	0	7691	Q2KDW6	Q2KDW6{57-70}	0.0001	0.0002	0.0003	Q2KDW6		30.75						63.0582
45731@20201019_1_3409_iTRAQ.cmpd.rclb.mgf	145.42	958.508	4	0	-0.0218	0	2	DGVK	FVIGHFNSGVSIPASEVYAENGILEITPAATNPK	FTER	MOD:01485 F1;MOD:01485 K34	0	3055	Q2K502	Q2K502{94-127}	0.0001	0.0002	0.0003	Q2K502		41.21		33.2645				95.044
23167@20201019_1_3409_iTRAQ.cmpd.rclb.mgf	76.77	812.429	2	0	-0.0003	0	2		SQSVSLTFPDGSVR	SFPA	MOD:01485 S1	0	8869	Q2K859	Q2K859{2-15}	0.0001	0.0002	0.0003	Q2K859		56.57		24.0127				115.011
15755@20201019_1_3409_iTRAQ.cmpd.rclb.mgf	55	523.545	4	0	0.0043	1	2	PSVK	SIIAGEQHSTIFKDTR	ELAK	MOD:01485 S1;MOD:01485 K13	0	5613	Q2K5F5	Q2K5F5{274-289}	0.0001	0.0002	0.0003	Q2K5F5		52.49						63.7337
32729@20201019_1_3409_iTRAQ.cmpd.rclb.mgf	105.12	686.865	4	0	0.0021	0	2	VVAK	HIFDGSDIAANPANNTLVGTGPFK	FAEH	MOD:01485 H1;MOD:01485 K24	0	10010	Q2K249	Q2K249{180-203}	0.0001	0.0002	0.0003	Q2K249		49.19						102.091
26385@20201019_1_3409_iTRAQ.cmpd.rclb.mgf	86.28	524.819	2	0	-0.0009	0	2		ADFIAVIR	RAVD	MOD:01485 A1	0	7116	Q2K4Y0	Q2K4Y0{2-9}	0.0001	0.0002	0.0003	Q2K4Y0		24.58						94.9944
45506@20201019_1_3409_iTRAQ.cmpd.rclb.mgf	144.77	680.866	4	1	-0.0113	0	2	SAWR	YDADVPLIVPEVNPDAVTQFTK	RNII	MOD:01485 Y1;MOD:01485 K22	0	4857	Q2K2U3	Q2K2U3{100-121}	0.0001	0.0002	0.0003	Q2K2U3		33.69		28.1833				76.6175
25373@20201019_1_3409_iTRAQ.cmpd.rclb.mgf	83.3	571.985	3	0	-0.0027	1	2	PSPK	ALEAIQQAADDRLR	LYPD	MOD:01485 A1	0	6304	Q2K332	Q2K332{42-55}	0.0001	0.0002	0.0003	Q2K332		28.45						74.6748
18414@20201019_1_3409_iTRAQ.cmpd.rclb.mgf	62.77	671.336	4	0	0.013	0	2	VDPK	FAGASSDNFHLSSGSTAIDHGTSK	YGVS	MOD:01485 F1;MOD:01485 K24	0	8866	Q2K908	Q2K908{346-369}	0.0001	0.0002	0.0003	Q2K908		59.64						96.1392
46628@20201019_1_3409_iTRAQ.cmpd.rclb.mgf	148.4	960.854	3	0	-0.0074	0	2	NFGK	IATESGAELVGTDGFDQSIQLVLTK	RADA	MOD:01485 I1;MOD:01485 K25	0	4137	Q2K336	Q2K336{155-179}	0.0001	0.0002	0.0003	Q2K336		28.34						82.6939
18509@20201019_1_3409_iTRAQ.cmpd.rclb.mgf	63.05	435.233	4	0	0.0049	0	2	RLAK	EAGIDLSAVAGSGPHGR	VIKS	MOD:01485 E1	0	4223	Q2K8W5	Q2K8W5{150-166}	0.0001	0.0002	0.0003	Q2K8W5		63.73						62.8881
52140@20201019_1_3409_iTRAQ.cmpd.rclb.mgf	166.47	827.435	4	0	0.0026	0	2	KDAK	SVGAGLDGLGAIIGELTDAPAPGANDAAGDQPK	TIEQ	MOD:01485 S1;MOD:01485 K33	0	2852	Q2KAB7	Q2KAB7{569-601}	0.0001	0.0002	0.0003	Q2KAB7		34.49						84.9081
56210@20201019_1_3409_iTRAQ.cmpd.rclb.mgf	180	882.222	4	0	0.0093	0	2	NINK	GNIQPLPIAVTDFLQGDMGAQVSQVIAADLQR	SGLF	MOD:01485 G1;MOD:00719 M18	0	9537	Q2K4L8	Q2K4L8{37-68}	0.0001	0.0002	0.0003	Q2K4L8		25.55						60.4393
32805@20201019_1_3409_iTRAQ.cmpd.rclb.mgf	105.35	500.515	4	0	0.0017	0	2	ALEK	GTIDAAEFVGPYDDLK	LGFH	MOD:01485 G1;MOD:01485 K16	0	2578	Q2K462	Q2K462{211-226}	0.0001	0.0002	0.0003	Q2K462		71.58						59.7396
49389@20201019_1_3409_iTRAQ.cmpd.rclb.mgf	157.83	677.859	4	1	-0.014	0	2	KFAK	ADAGWLSEAVFGQIVDPASGTLSK	APLG	MOD:01485 A1;MOD:01485 K24	0	7583	Q2K6G4	Q2K6G4{830-853}	0.0001	0.0002	0.0003	Q2K6G4		41.77						68.0242
45918@20201019_1_3409_iTRAQ.cmpd.rclb.mgf	145.98	609.075	4	0	0.0056	0	2	KGVR	ILLVDHEDSFVHTLANYFR	QTGA	MOD:01485 I1	0	5333	Q2K5P4	Q2K5P4{531-549}	0.0001	0.0002	0.0003	Q2K5P4		33.29						87.5274
41985@20201019_1_3409_iTRAQ.cmpd.rclb.mgf	132.73	1214.15	2	0	0.0022	0	2	PLAR	IVSWATAGVDPSIMGTGPIPASR	KALE	MOD:01485 I1	0	8991	Q2K324	Q2K324{276-298}	0.0001	0.0002	0.0003	Q2K324		28.36		20.4122				82.2519
12407@20201019_1_3409_iTRAQ.cmpd.rclb.mgf	45.02	474.73	4	0	0.005	1	2	LNER	REPDFDDGSLTENTR	CAYP	MOD:01485 R1	0	7556	Q2KE66	Q2KE66{308-322}	0.0001	0.0002	0.0003	Q2KE66		31.35						44.22
58105@20201019_1_3409_iTRAQ.cmpd.rclb.mgf	187.7	916.716	4	0	0.0064	0	2	PSGR	VIETDEDFVSELLESEGVAVVHGSAFGLGPNFR	ISYA	MOD:01485 V1	0	3230	Q2K5X1	Q2K5X1{343-375}	0.0001	0.0002	0.0003	Q2K5X1		56.9						105.84
52510@20201019_1_3409_iTRAQ.cmpd.rclb.mgf	167.68	715.612	4	1	-0.0053	0	2	ELIR	SIGNGFYVTELIGHGVNMITGEYSR	GATG	MOD:01485 S1	0	5998	Q2KBY4	Q2KBY4{365-389}	0.0001	0.0002	0.0003	Q2KBY4		27.52		25.0809				62.2879
52535@20201019_1_3409_iTRAQ.cmpd.rclb.mgf	167.75	553.56	4	0	0.004	0	2	FASR	GFNPVVAVSFAWTSAIEK	VAAE	MOD:01485 G1;MOD:01485 K18	0	2076	Q2KDS5	Q2KDS5{80-97}	0.0001	0.0002	0.0003	Q2KDS5		61.12						80.6223
19879@20201019_1_3409_iTRAQ.cmpd.rclb.mgf	67.05	627.09	4	0	-0.0057	1	2	ANAK	EMLGNTLVTAQTGEAGKQVNR	LYIE	MOD:01485 E1;MOD:01485 K17	0	1104	Q2K3F0	Q2K3F0{85-105}	0.0001	0.0002	0.0003	Q2K3F0		31.19						62.3342
45946@20201019_1_3409_iTRAQ.cmpd.rclb.mgf	146.07	539.058	4	0	0.0066	0	2	DANK	IVWLTPSPANNTWALAVR	NDVA	MOD:01485 I1	0	8956	Q2KCY0	Q2KCY0{115-132}	0.0001	0.0002	0.0003	Q2KCY0		47.96						71.4082
55874@20201019_1_3409_iTRAQ.cmpd.rclb.mgf	178.77	725.394	4	0	0.0047	0	2	KLLR	ELVELTDFPITSTLMGLGAYPASGK	NWLK	MOD:01485 E1;MOD:01485 K25	0	8302	Q2K6H7	Q2K6H7{226-250}	0.0001	0.0002	0.0003	Q2K6H7		41.74						92.3872
9942@20201019_1_3409_iTRAQ.cmpd.rclb.mgf	37.77	453.505	4	0	0.0032	1	2	FNVR	EITPDRDRPIAEVR	EKAV	MOD:01485 E1	0	4690	Q2K881	Q2K881{485-498}	0.0001	0.0002	0.0003	Q2K881		31.36						75.2142
23509@20201019_1_3409_iTRAQ.cmpd.rclb.mgf	77.78	641.011	3	1	-0.0132	0	2		TSINTNSSAQAALQTLR	NVNQ	MOD:01485 T1	0	5239	Q2KCF1	Q2KCF1{2-18}	0.0001	0.0002	0.0003	Q2KCF1		30.4						76.0658
19188@20201019_1_3409_iTRAQ.cmpd.rclb.mgf	65.02	609.54	4	0	0.0037	1	2	LEYR	YTDYQSKDYDLDSGSFSR	GYDE	MOD:01485 Y1;MOD:01485 Y9	0	5698	Q2KA52	Q2KA52{179-196}	0.0001	0.0002	0.0003	Q2KA52		27.06						71.317
21877@20201019_1_3409_iTRAQ.cmpd.rclb.mgf	72.97	567.81	4	0	0.0064	0	2	IMIK	AGEAVDQQMEALRPHLSK	GDIM	MOD:01485 A1;MOD:01485 K18	0	2555	Q2K7E1	Q2K7E1{85-102}	0.0001	0.0002	0.0003	Q2K7E1		45.82						75.8739
35688@20201019_1_3409_iTRAQ.cmpd.rclb.mgf	114.23	723.609	4	0	-0.0011	0	2	VLMK	HPHVWVLTDDMYEHLTYGDFK	FVTP	MOD:01485 H1;MOD:01485 K21	0	3230	Q2K5X1	Q2K5X1{196-216}	0.0001	0.0002	0.0003	Q2K5X1		26.96						81.9842
54940@20201019_1_3409_iTRAQ.cmpd.rclb.mgf	175.9	989.548	4	1	-0.0136	0	2	DGIR	FVVGPVTSGVAIPVSDVLAENGVLMVTPTATAPDLTK	RGLA	MOD:01485 F1;MOD:01485 K37	0	5167	Q2K5M7	Q2K5M7{93-129}	0.0001	0.0002	0.0003	Q2K5M7		44.94		33.16				103.516
58526@20201019_1_3409_iTRAQ.cmpd.rclb.mgf	189.3	991.757	4	0	0.0025	0	2	DAIR	ELMAAVDSYIPTPERPVDQPFLMPIEDVFSISGR	GTVV	MOD:01485 E1	0	9836	Q2K9N2	Q2K9N2{188-221}	0.0001	0.0002	0.0003	Q2K9L8;Q2K9N2		24.97						88.791
52605@20201019_1_3409_iTRAQ.cmpd.rclb.mgf	168.02	553.56	4	0	0.0041	0	2	FASR	GFNPVVAVSFAWTSAIEK	VAAE	MOD:01485 G1;MOD:01485 K18	0	2076	Q2KDS5	Q2KDS5{80-97}	0.0001	0.0002	0.0003	Q2KDS5		68.21						80.2778
39955@20201019_1_3409_iTRAQ.cmpd.rclb.mgf	126.77	560.075	4	0	-0.0202	1	2	GLVR	LVGGLIDPAPLPSPFDKGR	LVLD	MOD:01485 L1;MOD:01485 K17	0	5435	Q2K1T9	Q2K1T9{174-192}	0.0001	0.0002	0.0003	Q2K1T9		45.82						50.8303
32158@20201019_1_3409_iTRAQ.cmpd.rclb.mgf	103.45	645.35	3	0	0.0062	0	2		TSINTNNAAMAALQTLR	GINQ	MOD:01485 T1	0	5239	Q2KCF0	Q2KCF0{2-18}	0.0001	0.0002	0.0003	Q2KCF0		91.71						105.438
44839@20201019_1_3409_iTRAQ.cmpd.rclb.mgf	142.68	834.108	3	0	0.0133	0	2	IYEK	LIEGSELVDAPCAPATLEMLAR	FSVL	MOD:01214 C12;MOD:01485 L1	0	9398	Q2K6F1	Q2K6F1{295-316}	0.0001	0.0002	0.0003	Q2K6F1		55.13						103.99
27700@20201019_1_3409_iTRAQ.cmpd.rclb.mgf	90.13	817.067	3	1	-0.0113	0	2	FLTK	QVDANNGAVTDVQGTYGTFHVK	ADGS	MOD:00040 Q1;MOD:01485 K22	0	201	Q2K1Q3	Q2K1Q3{162-183}	0.0001	0.0002	0.0003	Q2K1Q3		29.71						79.9689
29479@20201019_1_3409_iTRAQ.cmpd.rclb.mgf	95.6	529.067	4	0	-0.0019	1	2	GSGR	LTPPKAPLFLGNAGTATR	FLTA	MOD:01485 L1;MOD:01485 K5	0	4583	Q2KBU1	Q2KBU1{84-101}	0.0001	0.0002	0.0003	Q2KBU1		25.55						60.2417
40702@20201019_1_3409_iTRAQ.cmpd.rclb.mgf	128.95	871.428	4	0	-0.0071	0	2	DLAK	IASSGQSSQWAQTPWVWNEGYGELGAADAK	YHVV	MOD:01485 I1;MOD:01485 K30	0	2259	Q2K612	Q2K612{176-205}	0.0001	0.0002	0.0003	Q2K612		64.07						105.829
24013@20201019_1_3409_iTRAQ.cmpd.rclb.mgf	79.32	472.529	4	0	-0.0067	1	2	IAGK	TDGLQGLKENVIVGR	LIPA	MOD:01485 T1;MOD:01485 K8	0	2724	Q2K9M3	Q2K9M3{1336-1350}	0.0001	0.0002	0.0003	Q2K9M3		40.1						80.2501
33374@20201019_1_3409_iTRAQ.cmpd.rclb.mgf	107.02	523.02	4	0	-0.0027	0	2	VFHR	VIQDFMAQTGDVEYGK	KGSE	MOD:01485 V1;MOD:01485 K16	0	2976	Q2K8D7	Q2K8D7{53-68}	0.0001	0.0002	0.0003	Q2K8D7		56.21						64.7135
22854@20201019_1_3409_iTRAQ.cmpd.rclb.mgf	75.82	960.521	2	0	0.0037	0	2		TSINTNSSAQAALQTLR	NVNQ	MOD:01485 T1	0	5239	Q2KCF1	Q2KCF1{2-18}	0.0001	0.0002	0.0003	Q2KCF1		63.5		25.4128				144.097
38814@20201019_1_3409_iTRAQ.cmpd.rclb.mgf	123.4	1159.12	2	0	0.0065	0	2	REGR	IPIYEPGLDQLVAENTSTGR	LSFS	MOD:01485 I1	0	559	Q2K584	Q2K584{40-59}	0.0001	0.0002	0.0003	Q2K584		64.26						110.127
24161@20201019_1_3409_iTRAQ.cmpd.rclb.mgf	79.73	759.358	3	0	0.008	0	2	STLK	AASLTADQFDSEEGTMSSLR	SMSE	MOD:01485 A1;MOD:00719 M16	0	478	Q2K2Q6	Q2K2Q6{168-187}	0.0001	0.0002	0.0003	Q2K2Q6		25.4						72.6129
39836@20201019_1_3409_iTRAQ.cmpd.rclb.mgf	126.42	592.574	4	0	0.0028	0	2	VVRR	EAHLAAPPAAVFALMTDPEK	ILRW	MOD:01485 E1;MOD:01485 K20	0	4177	Q2K6S8	Q2K6S8{14-33}	0.0001	0.0002	0.0003	Q2K6S8		26.73						65.3884
25940@20201019_1_3409_iTRAQ.cmpd.rclb.mgf	84.97	533.801	4	0	0.0001	1	2	NAAK	AAGIGHLIYSSVADADRK	TGIP	MOD:01485 A1;MOD:01485 K18	0	9506	Q2K759	Q2K759{101-118}	0.0001	0.0002	0.0003	Q2K759		39.15						55.7686
29773@20201019_1_3409_iTRAQ.cmpd.rclb.mgf	96.45	825.174	4	1	-0.0161	0	2	HGNR	NVAGVGQFGSNHTTILTQDGNGNIAAGVQVGR	GCSA	MOD:01485 N1	0	2383	Q2K0F5	Q2K0F5{92-123}	0.0001	0.0002	0.0003	Q2K0F5		29.93						118.73
22662@20201019_1_3409_iTRAQ.cmpd.rclb.mgf	75.25	653.335	4	1	-0.0104	0	2	FLTK	QVDANNGAVTDVQGTYGTFHVK	ADGS	MOD:01485 Q1;MOD:01485 K22	0	201	Q2K1Q3	Q2K1Q3{162-183}	0.0001	0.0002	0.0003	Q2K1Q3		60.91		31.8109				83.4495
8051@20201019_1_3409_iTRAQ.cmpd.rclb.mgf	32.05	566.278	3	0	-0.0018	0	2	FFAR	HGVHDEEEFLGQR	FFVD	MOD:01485 H1	0	5163	Q2K7S1	Q2K7S1{17-29}	0.0001	0.0002	0.0003	Q2K7S1		27.94						61.7974
39088@20201019_1_3409_iTRAQ.cmpd.rclb.mgf	124.22	622.092	4	0	0.0018	1	2	GYDR	LIENPAAFYITFDNKEVGR	LQAQ	MOD:01485 L1;MOD:01485 K15	0	10540	Q2K5E8	Q2K5E8{115-133}	0.0001	0.0002	0.0003	Q2K5E8		37.67						61.2395
12554@20201019_1_3409_iTRAQ.cmpd.rclb.mgf	45.45	440.511	4	0	0.0076	1	2	GEPK	QGVSAANKVVGDGIR	FVVG	MOD:01485 Q1;MOD:01485 K8	0	5167	Q2K5M7	Q2K5M7{78-92}	0.0001	0.0002	0.0003	Q2K5M7		64.58						77.3412
18303@20201019_1_3409_iTRAQ.cmpd.rclb.mgf	62.45	453.508	4	0	0.0005	0	2	VADR	TGHAILHTLYGQSLR	NNAE	MOD:01485 T1	0	10076	Q2K3E5	Q2K3E5{154-168}	0.0001	0.0002	0.0003	Q2K3E5		26.91						71.8163
29652@20201019_1_3409_iTRAQ.cmpd.rclb.mgf	96.08	933.489	2	1	-0.0162	0	2	ADFR	VCNGTQNLVGVAIGYR	AKDG	MOD:01214 C2;MOD:01485 V1	0	4292	Q2K4D7	Q2K4D7{45-60}	0.0001	0.0002	0.0003	Q2K4D7		31.1						86.8206
33765@20201019_1_3409_iTRAQ.cmpd.rclb.mgf	108.15	532.064	4	0	0.0016	0	2	QTAK	ALTAASQIGSDVHVLVAGK	GARA	MOD:01485 A1;MOD:01485 K19	0	2103	Q2JYP2	Q2JYP2{21-39}	0.0001	0.0002	0.0003	Q2JYP2		59.62						70.9218
46785@20201019_1_3409_iTRAQ.cmpd.rclb.mgf	148.88	640.038	3	0	0.0017	0	2		TSILTNVAAMAALQTLR	GIND	MOD:01485 T1	0	5239	Q2KCE9	Q2KCE9{2-18}	0.0001	0.0002	0.0003	Q2KCE9		83.33						95.7587
31983@20201019_1_3409_iTRAQ.cmpd.rclb.mgf	102.93	681.369	4	1	-0.0156	0	2	DNKK	LSIGVDSNQNHLHPGSVLTSMVK	RVDL	MOD:01485 L1;MOD:01485 K23	0	2076	Q2KDS5	Q2KDS5{231-253}	0.0001	0.0002	0.0003	Q2KDS5		41.23						92.7815
46135@20201019_1_3409_iTRAQ.cmpd.rclb.mgf	146.62	704.388	4	0	-0.0004	1	2	GSVR	GRVGYDMNPFLLYGTAGLALGNVK	VSDG	MOD:01485 Y5;MOD:01485 K24	0	5698	Q2KA52	Q2KA52{119-142}	0.0001	0.0002	0.0003	Q2KA52		27.24						64.7963
32495@20201019_1_3409_iTRAQ.cmpd.rclb.mgf	104.43	718.395	4	0	-0.0016	0	2	AHKR	AIHQDAPAYVEQSTEAQILVTGIK	VVDL	MOD:01485 A1;MOD:01485 K24	0	8381	Q2K3H0	Q2K3H0{114-137}	0.0001	0.0002	0.0003	Q2K3H0		69.36						77.3576
60442@20201019_1_3409_iTRAQ.cmpd.rclb.mgf	199.93	855.469	4	0	0.0031	0	2	SAAK	QLTDVESLISQGANALIILAQDADAIAPAIEK	AAAE	MOD:00040 Q1;MOD:01485 K32	0	10540	Q2K5E8	Q2K5E8{70-101}	0.0001	0.0002	0.0003	Q2K5E8		78.52						93.3077
38644@20201019_1_3409_iTRAQ.cmpd.rclb.mgf	122.9	682.335	6	0	0.0134	0	2		ASPIHATDDSATFQETDVISGNLLSNDSSDNGHLFLR	AFDG	MOD:01485 A1	0	201	Q2K1Q3	Q2K1Q3{2-38}	0.0001	0.0002	0.0003	Q2K1Q3		39.86						45.0011
2296@20201019_1_3409_iTRAQ.cmpd.rclb.mgf	15.18	415.725	4	0	-0.0007	0	2	AARK	ELEHAELHEHK	SRLE	MOD:01485 E1;MOD:01485 K11	0	9389	Q2K3H1	Q2K3H1{105-115}	0.0001	0.0002	0.0003	Q2K3H1		34.73						52.151
12721@20201019_1_3409_iTRAQ.cmpd.rclb.mgf	45.93	582.048	4	0	0.0055	1	2	VAMK	QAIADSGLEEKDYAQNER	AGII	MOD:01485 Q1;MOD:01485 K11	0	4370	Q2KE03	Q2KE03{84-101}	0.0001	0.0002	0.0003	Q2KE03		33.45						57.6024
55665@20201019_1_3409_iTRAQ.cmpd.rclb.mgf	178.13	719.388	4	1	-0.0003	1	2	HNDR	GTGIAAAELALLAGADRVEGTLFGNGER	TGNV	MOD:01485 G1	0	10293	Q2K5Q2	Q2K5Q2{260-287}	0.0001	0.0002	0.0003	Q2K5Q2		25.69		24.6067				64.8644
39513@20201019_1_3409_iTRAQ.cmpd.rclb.mgf	125.47	666.628	4	0	-0.0032	0	2	GEQK	VSNTAGGAALGALGGALVGVAVGGGGHGK	RNAA	MOD:01485 V1;MOD:01485 K29	0	998	Q2K6F8	Q2K6F8{30-58}	0.0001	0.0002	0.0003	Q2K6F8		98.69						113.221
54833@20201019_1_3409_iTRAQ.cmpd.rclb.mgf	175.6	813.396	4	0	-0.0002	0	2	KGFK	GLVNGEYDNLPEAAFYMVGSMDEAIEK	AKKL	MOD:01485 G1;MOD:01485 K27	0	8381	Q2K3H0	Q2K3H0{442-468}	0.0001	0.0002	0.0003	Q2K3H0		44						79.2468
26773@20201019_1_3409_iTRAQ.cmpd.rclb.mgf	87.42	518.306	4	0	0.0016	1	2	EMFR	KLLDQGQAGDNIGALIR	GVNR	MOD:01485 K1;MOD:01485 K1	0	9836	Q2K9N2	Q2K9N2{261-277}	0.0001	0.0002	0.0003	Q2K9L8;Q2K9N2		30.5						54.1672
21745@20201019_1_3409_iTRAQ.cmpd.rclb.mgf	72.58	408.247	4	0	0.0008	0	2	IVNK	LVHDANIAYVVK	ATRA	MOD:01485 L1;MOD:01485 K12	0	5417	Q2K504	Q2K504{172-183}	0.0001	0.0002	0.0003	Q2K504		35.57						36.6124
60333@20201019_1_3409_iTRAQ.cmpd.rclb.mgf	196	691.142	4	0	-0.0057	0	2	VENR	LPSSDANPYLALAASLASGLLGIMK	EIEP	MOD:01485 L1;MOD:01485 K25	0	2441	Q2KCB4	Q2KCB4{379-403}	0.0001	0.0002	0.0003	Q2KCB4		34.85						81.7129
36927@20201019_1_3409_iTRAQ.cmpd.rclb.mgf	117.88	575.574	4	0	0.0153	1	2	EGYR	FLAGEILEIDERNPQLAAR	ILTS	MOD:01485 F1	0	3195	Q2KAN3	Q2KAN3{818-836}	0.0001	0.0002	0.0003	Q2KAN3		45.18						73.7811
23785@20201019_1_3409_iTRAQ.cmpd.rclb.mgf	78.58	661.813	4	0	0.0067	0	2	SAGK	TYEAYIYSDVNHGFHNDTTPR	YDEA	MOD:01485 Y2	0	1156	Q2K107	Q2K107{253-273}	0.0001	0.0002	0.0003	Q2K107		52.1						73.0262
44253@20201019_1_3409_iTRAQ.cmpd.rclb.mgf	140.97	621.321	4	0	0.0015	0	2	AEMK	AECSFVSTDWDGIIPALNAK	KFDM	MOD:01214 C3;MOD:01485 A1;MOD:01485 K20	0	3015	Q2K7J0	Q2K7J0{67-86}	0.0001	0.0002	0.0003	Q2K7J0		65.32						78.6013
20226@20201019_1_3409_iTRAQ.cmpd.rclb.mgf	68.07	533.553	4	0	0.0007	0	2	DYIK	AAQGNLAGSITTHHLIINR	NAIL	MOD:01485 A1	0	8035	Q2KCZ6	Q2KCZ6{186-204}	0.0001	0.0002	0.0003	Q2KCZ6		34.54						60.7898
56648@20201019_1_3409_iTRAQ.cmpd.rclb.mgf	181.47	641.858	4	0	0.0075	0	2	AVYR	EAQEILAEDVPALYLFVMPK	LGVW	MOD:01485 E1;MOD:01485 K20	0	3873	Q2KDP1	Q2KDP1{461-480}	0.0001	0.0002	0.0003	Q2KDP1		39						67.0002
30652@20201019_1_3409_iTRAQ.cmpd.rclb.mgf	99.03	572.549	4	0	0.0097	0	2	FPVK	SVAPCEGTGYEIGSMSIIK	GARN	MOD:01214 C5;MOD:01485 S1;MOD:01485 K19	0	638	Q2K8C6	Q2K8C6{241-259}	0.0001	0.0002	0.0003	Q2K8C6		42.34						60.8784
15663@20201019_1_3409_iTRAQ.cmpd.rclb.mgf	54.73	523.545	4	0	0.0047	1	2	PSVK	SIIAGEQHSTIFKDTR	ELAK	MOD:01485 S1;MOD:01485 K13	0	5613	Q2K5F5	Q2K5F5{274-289}	0.0001	0.0002	0.0003	Q2K5F5		49.48						69.0021
38125@20201019_1_3409_iTRAQ.cmpd.rclb.mgf	121.38	494.289	4	0	0.0018	1	2	DQCK	SALAEVDRLLAAAGSNK	SKIL	MOD:01485 S1;MOD:01485 K17	0	3566	Q2K689	Q2K689{40-56}	0.0001	0.0002	0.0003	Q2K689		64.68						74.7215
53535@20201019_1_3409_iTRAQ.cmpd.rclb.mgf	170.88	873.785	3	0	0.0024	0	2		AFELPELPYDYEALAPFMSK	ETLE	MOD:01485 A1;MOD:01485 K20	0	3834	Q2KAX8	Q2KAX8{2-21}	0.0001	0.0002	0.0003	Q2KAX8		41.14						104
42247@20201019_1_3409_iTRAQ.cmpd.rclb.mgf	134.7	809.684	4	0	0.0009	1	2	DAFK	ATLNAGGITEVVNDAITPGDKDFSALTTR	IKSE	MOD:01485 A1;MOD:01485 K21	0	5167	Q2K5M7	Q2K5M7{181-209}	0.0001	0.0002	0.0003	Q2K5M7		37.17						101.133
21121@20201019_1_3409_iTRAQ.cmpd.rclb.mgf	70.77	509.512	4	0	0.0033	0	2	TGIK	VVYDTFDSNETVETK	LLAG	MOD:01485 V1;MOD:01485 K15	0	189	Q2KCA6	Q2KCA6{54-68}	0.0001	0.0002	0.0003	Q2KCA6		73.32						68.1952
43122@20201019_1_3409_iTRAQ.cmpd.rclb.mgf	137.63	599.067	4	0	0.002	1	2	VLPK	DYQLDPVRDFTLHVDFLR	VSGN	MOD:01485 D1	0	7015	Q2K5U4	Q2K5U4{80-97}	0.0001	0.0002	0.0003	Q2K5U4		29.74						66.376
37555@20201019_1_3409_iTRAQ.cmpd.rclb.mgf	119.72	509.985	3	0	0.0004	0	2	DALK	IGIAGLGTVGASLVR	IIQQ	MOD:01485 I1	0	5900	Q2K917	Q2K917{7-21}	0.0001	0.0002	0.0003	Q2K917		54.03						89.5607
57345@20201019_1_3409_iTRAQ.cmpd.rclb.mgf	184.18	995.756	4	0	0.0036	0	2	DAIR	ELMAAVDSYIPTPERPVDQPFLMPIEDVFSISGR	GTVV	MOD:01485 E1;MOD:00719 M23	0	9836	Q2K9N2	Q2K9N2{188-221}	0.0001	0.0002	0.0003	Q2K9L8;Q2K9N2		55.85						103.563
60320@20201019_1_3409_iTRAQ.cmpd.rclb.mgf	195.82	712.153	4	0	-0.0034	0	2	KVVR	TALQDAASVASLLITTEAMIAELPK	KDAP	MOD:01485 T1;MOD:01485 K25	0	6161	Q2KBZ7	Q2KBZ7{502-526}	0.0001	0.0002	0.0003	Q2KBZ7		40.29						87.5549
14990@20201019_1_3409_iTRAQ.cmpd.rclb.mgf	52.58	441.588	3	0	-0.0011	0	2		SATDLASLEK	TIEA	MOD:01485 S1;MOD:01485 K10	0	6399	Q2KD46	Q2KD46{2-11}	0.0001	0.0002	0.0003	Q2KD46		37.54						64.7159
13993@20201019_1_3409_iTRAQ.cmpd.rclb.mgf	49.67	413.244	3	0	0.0007	0	2		SEITAAMVK	ELRE	MOD:01485 S1;MOD:01485 K9	0	6902	Q2K8Y6	Q2K8Y6{2-10}	0.0001	0.0002	0.0003	Q2K8Y6		41.16						84.1295
[truncated: 105,930 more rows]

## Sheet: ident_proteins
ID	length	Mw(kDa)	pI	GRAVY	inferred.protein.fdr	best.peptide.fdr	protein.group	inferred.protein.group.size	%sequence_coverage	pept_unique	pept_inferred	pept_ambiguous	pept_excluded	header
[truncated: 1,685 more rows]

[truncated: 3 more sheets: ident_legend, quant_design, quant_RESP_vs_RES]
